# Supplementary material for: Effect of host genotype and Eimeria acervulina infection on the metabolome of meat-type chickens
Source: PLoS One. 2019 Oct 16;14(10):e0223417. doi: 10.1371/journal.pone.0223417 (PMC6795442; doi:10.1371/journal.pone.0223417)
Supplement: S1 Table — Dataset used for analysis. (XLSX) [file pone.0223417.s001.xlsx]

## Sheet: Sheet1
												SAMPLE NAME	UNGA-00326	UNGA-00327	UNGA-00328	UNGA-00329	UNGA-00330	UNGA-00331	UNGA-00332	UNGA-00333	UNGA-00334	UNGA-00335	UNGA-00336	UNGA-00337	UNGA-00338	UNGA-00339	UNGA-00340	UNGA-00341	UNGA-00342	UNGA-00343	UNGA-00344	UNGA-00345	UNGA-00346	UNGA-00347	UNGA-00348	UNGA-00349	UNGA-00350	UNGA-00351	UNGA-00352	UNGA-00353	UNGA-00354	UNGA-00355	UNGA-00356	UNGA-00357	UNGA-00358	UNGA-00359	UNGA-00360	UNGA-00361	UNGA-00362
												PARENT SAMPLE ID	6127065	6127066	6127067	6127068	6127069	6127070	6127071	6127072	6127073	6127074	6127075	6127076	6127077	6127078	6127079	6127080	6127081	6127082	6127083	6127084	6127085	6127086	6127087	6127088	6127089	6127090	6127091	6127092	6127093	6127094	6127095	6127096	6127097	6127098	6127099	6127100	6127101
												CLIENT IDENTIFIER	A1	A2	A3	A4	A5	C6	C7	C8	C9	C10	708	720	701	482	495	139	185	176	190	154	725	733	743	746	760	130	120	114	150	136	483	496	498	707	715	143	180
												HOST GENOTYPE	ACRB	ACRB	ACRB	ACRB	ACRB	COBB	COBB	COBB	COBB	COBB	ACRB	ACRB	ACRB	ACRB	ACRB	COBB	COBB	COBB	COBB	COBB	ACRB	ACRB	ACRB	ACRB	ACRB	COBB	COBB	COBB	COBB	COBB	ACRB	ACRB	ACRB	ACRB	ACRB	COBB	COBB
												ORIG ORDER	1	2	3	4	5	6	7	8	9	10	11	12	13	14	15	16	17	18	19	20	21	22	23	24	25	26	27	28	29	30	31	32	33	34	35	36	37
												SERUM	Serum	Serum	Serum	Serum	Serum	Serum	Serum	Serum	Serum	Serum	Serum	Serum	Serum	Serum	Serum	Serum	Serum	Serum	Serum	Serum	Serum	Serum	Serum	Serum	Serum	Serum	Serum	Serum	Serum	Serum	Serum	Serum	Serum	Serum	Serum	Serum	Serum
												SPL AMNT	200 uL	200 uL	200 uL	200 uL	200 uL	200 uL	200 uL	200 uL	200 uL	200 uL	200 uL	200 uL	200 uL	200 uL	200 uL	200 uL	200 uL	200 uL	200 uL	200 uL	200 uL	200 uL	200 uL	200 uL	200 uL	200 uL	200 uL	200 uL	200 uL	200 uL	200 uL	200 uL	200 uL	200 uL	200 uL	200 uL	200 uL
												STATISTICAL COMPARISONS	GROUPs 1,2,5, 6	GROUP 1 vs GROUP5	GROUP 1 vs GROUP7	GROUP 2 vs GROUP6	GROUP 2 vs GROUP 8	GROUP 5 vs GROUP 7	GROUP 6 vs GROUP 8	GROUPs 3, 4, 7, 8	GROUP 5 vs GROUP 6	GROUP 7 vs GROUP 8
												TIME DAYS POST INFECTION	4	4	4	4	4	4	4	4	4	4	4	4	4	4	4	4	4	4	4	4	6	6	6	6	6	6	6	6	6	6	6	6	6	6	6	6	6
												VOLUME EXTRACTED	50	50	50	50	50	50	50	50	50	50	50	50	50	35	50	50	50	50	50	50	50	50	50	50	50	50	50	50	50	50	50	50	50	50	50	50	50
												GROUP NUMBER	1	1	1	1	1	2	2	2	2	2	3	3	3	3	3	4	4	4	4	4	5	5	5	5	5	6	6	6	6	6	7	7	7	7	7	8	8
PATHWAY SORTORDER	BIOCHEMICAL	SUPER PATHWAY	SUB PATHWAY	COMP ID	PLATFORM	CHEMICAL ID	RI	MASS	PUBCHEM	CAS	KEGG	Group HMDB	ACRB Ctrl 4	ACRB Ctrl 4	ACRB Ctrl 4	ACRB Ctrl 4	ACRB Ctrl 4	COBB Ctrl 4	COBB Ctrl 4	COBB Ctrl 4	COBB Ctrl 4	COBB Ctrl 4	ACRB Tx 4	ACRB Tx 4	ACRB Tx 4	ACRB Tx 4	ACRB Tx 4	COBB Tx 4	COBB Tx 4	COBB Tx 4	COBB Tx 4	COBB Tx 4	ACRB Ctrl 6	ACRB Ctrl 6	ACRB Ctrl 6	ACRB Ctrl 6	ACRB Ctrl 6	COBB Ctrl 6	COBB Ctrl 6	COBB Ctrl 6	COBB Ctrl 6	COBB Ctrl 6	ACRB Tx 6	ACRB Tx 6	ACRB Tx 6	ACRB Tx 6	ACRB Tx 6	COBB Tx 6	COBB Tx 6
1481	(14 or 15)-methylpalmitate (a17:0 or i17:0)	Lipid	Fatty Acid, Branched	38768	LC/MS Neg	100002945	5695	269.249	17903417				0.7694	0.9123	0.8401	0.7883	1.0272	0.8499	0.6953	0.8786	0.6578	0.8064	0.7205	0.735	0.8239	1.1168	0.9782	1.0585	1.007	1.1825	0.9608	0.9939	1.0061	1.0974	1.0987	1.221	0.8953	0.9142	1.1027	1.0894	1.1887	1.1558	1.2534	0.9592	1.2097	1.6752	1.1211	1.3894	1.0441
1485	(16 or 17)-methylstearate (a19:0 or i19:0)	Lipid	Fatty Acid, Branched	38296	LC/MS Neg	100002356	5993	297.28	3083779	2724-59-6		HMDB37397	0.8102	0.8737	0.861	0.7937	1.0222	0.9116	0.3402	1.2195	0.61	0.6177	0.4811	0.584	0.8012	1.196	0.9836	1.2758	1.4556	1.2268	1.0089	1.3391	0.8573	1.017	1.0805	1.2077	0.9001	0.8014	1.3632	0.9911	1.3587	1.2868	1.1318	0.7694	1.475	1.5178	1.1343	1.6277	0.7659
487	(N(1) + N(8))-acetylspermidine	Amino Acid	Polyamine Metabolism	57814	LC/MS Pos Early	100016038	3080	188.176	123689;496				1.1142	0.4133	0.4023	3.0761	26.0275	0.4077	0.4057	0.7323	0.4226	0.3171	0.2644	0.2644	1.471	0.3862	0.406	1	1.0852	1.6918	1.9448	0.6264	3.3231	1.7853	1.9417	1.6407	0.7549	2.1986	1.9332	7.2318	3.0512	0.5598	1.1042	2.7128	1.2011	0.7926	0.6137	0.5434	1.2057
1715	(R)-3-hydroxybutyrylcarnitine	Lipid	Fatty Acid Metabolism (Acyl Carnitine, Hydroxy)	43264	LC/MS Pos Early	100003926	2400	248.149	53481617			HMDB13127	0.6607	0.2791	0.2791	0.2791	0.2791	1.787	0.4117	1.4496	0.7561	0.5062	2.683	2.4543	0.2791	1.9121	0.8934	0.7981	0.2791	0.4151	0.2791	0.2791	0.7611	1.7757	0.8016	0.2791	1.8026	0.2791	0.9812	0.3558	0.2791	0.2791	0.3172	1.764	1.8294	3.6181	1.2442	2.2673	1.8476
1716	(S)-3-hydroxybutyrylcarnitine	Lipid	Fatty Acid Metabolism (Acyl Carnitine, Hydroxy)	52984	LC/MS Pos Early	100009271	2340	248.149				HMDB13127	1.0147	0.4912	1.274	1.0267	0.7717	0.8501	0.824	1.395	0.8882	0.5786	1.2645	1.1205	1.1353	4.0795	1.4885	1.0252	0.8345	0.9723	0.8422	0.9027	1.0072	1.0242	1.6869	0.8506	1.4529	0.8977	0.8807	0.8946	0.9197	0.8996	1.0411	0.9393	1.3698	2.0549	1.2631	0.9928	1.1261
2563	1-(1-enyl-oleoyl)-GPE (P-18:1)*	Lipid	Lysoplasmalogen	44621	LC/MS Pos Late	100005372	1566	464.314					1.1056	1.3796	2.5963	0.8884	1.3191	1.414	0.3631	0.9809	0.7443	0.8935	0.2444	0.2145	0.3708	0.2079	0.2573	0.3039	0.4681	0.3427	0.4028	0.2415	0.8453	0.9552	1.883	1.7046	1.3716	2.0071	1.4425	0.6635	1.8294	1.7703	1.1627	0.8936	1.0191	1.6117	1.4145	2.7145	0.9759
2532	1-(1-enyl-palmitoyl)-2-arachidonoyl-GPE (P-16:0/20:4)*	Lipid	Plasmalogen	52673	LC/MS Pos Late	100009002	2270	724.528				HMDB11352	0.8922	1.4241	0.9379	0.7586	0.7818	0.6741	0.9106	1.0626	0.7976	0.9057	1.1105	0.8506	0.8335	1.3482	1.0133	0.9432	1.142	1.1497	1.0739	0.783	1.2143	0.9353	0.9157	1.2569	1.1489	1.0068	0.9469	1.1958	1.2761	1.0037	1.0575	0.9428	1.0638	1.1288	1.1733	0.9983	0.6894
2541	1-(1-enyl-palmitoyl)-2-linoleoyl-GPC (P-16:0/18:2)*	Lipid	Plasmalogen	52682	LC/MS Pos Late	100009009	2226	742.574				HMDB11211	0.7443	1.5706	0.9936	1.1465	0.4784	0.4003	0.7509	0.7987	1.0941	0.7314	0.3153	0.2915	0.6977	1.1036	0.5257	1.1156	1.5073	1.1738	1.7043	0.8948	1.0223	0.7269	0.9363	1.101	0.7741	1.1287	1.0064	1.2705	1.3217	0.5671	1.3155	1.1349	1.6786	1.5676	1.3731	1.7776	0.7469
2529	1-(1-enyl-palmitoyl)-2-linoleoyl-GPE (P-16:0/18:2)*	Lipid	Plasmalogen	52677	LC/MS Pos Late	100009069	2351	700.528				HMDB11343	1.0881	2.0886	1.3364	1.3319	0.8482	0.6177	0.9032	0.7575	1.3944	0.6564	0.5736	0.4547	0.6042	2.8214	0.6044	0.885	1.1312	0.9841	1.4499	0.72	1.5895	0.9271	1.2244	1.1289	0.4613	1.2129	1.1968	1.2891	1.4279	0.9816	1.0159	0.9368	1.2359	1.2185	1.3015	0.895	0.6036
2534	1-(1-enyl-palmitoyl)-2-oleoyl-GPC (P-16:0/18:1)*	Lipid	Plasmalogen	52478	LC/MS Pos Late	100009007	2443	744.59					0.8832	1.5715	0.8081	0.6928	0.7231	0.7178	1.345	1.5925	1.2202	1.2933	0.7685	0.6911	0.6575	0.9922	0.6371	0.8725	0.9681	1.0914	1.149	0.7286	1.3696	0.9199	0.6273	1.2533	1.0078	1.1164	0.9129	1.4851	0.9229	0.8688	1.0317	2.0808	1.6399	1.8413	1.4098	1.6601	1.2944
2528	1-(1-enyl-palmitoyl)-2-oleoyl-GPE (P-16:0/18:1)*	Lipid	Plasmalogen	52477	LC/MS Pos Late	100009005	2600	702.543				HMDB11342	0.9473	1.8223	0.967	1.0276	0.6923	0.798	0.9968	1.1086	1.5318	1.5272	0.603	0.493	0.6363	1.0264	0.6516	0.9635	1.2487	1.4165	1.5738	1.0032	1.1594	0.8868	0.9586	1.0544	0.8321	1.4575	1.3652	1.72	2.0244	1.3044	0.8648	0.8616	0.9941	1.2515	1.4043	0.9002	0.5515
2530	1-(1-enyl-palmitoyl)-2-palmitoyl-GPC (P-16:0/16:0)*	Lipid	Plasmalogen	52716	LC/MS Pos Late	100009162	2454	718.574	11146967			HMDB11206	0.884	1.8932	0.8909	0.9398	0.8323	0.6733	1.2048	1.377	1.1116	1.1279	0.8744	0.6349	0.6455	0.8733	0.626	0.8775	1.1593	0.8805	1.1848	0.7777	1.326	0.9213	0.7807	1.3302	1.0439	1.1479	1.0386	1.8113	1.4644	0.9829	1.0171	1.191	1.2622	1.1653	1.1375	1.3737	0.879
2560	1-(1-enyl-palmitoyl)-GPC (P-16:0)*	Lipid	Lysoplasmalogen	52474	LC/MS Pos Late	100002875	1547	480.345	10917802			HMDB10407	1.3597	2.2575	1.9152	0.8657	1.5871	1.4441	0.4374	0.9569	0.7787	0.8723	0.2796	0.1695	0.3287	0.1811	0.2254	0.1842	0.3034	0.1277	0.2715	0.1277	0.6248	0.9262	1.8459	1.7823	1.2926	1.1719	1.2049	0.4021	1.7401	1.0384	1.1975	1	0.823	1.2599	1.2016	2.1475	0.7286
2561	1-(1-enyl-palmitoyl)-GPE (P-16:0)*	Lipid	Lysoplasmalogen	39270	LC/MS Pos Late	100003000	1558	438.298					1.2658	1.4846	2.3302	0.977	1.6161	1.2649	0.3484	1.023	0.6309	0.7351	0.2091	0.1227	0.2689	0.163	0.1786	0.1739	0.3011	0.1959	0.2254	0.1799	0.6488	0.9661	1.9846	1.684	1.4122	1.7957	1.4546	0.4926	1.5916	1.5944	1.0581	0.8242	0.8194	1.4859	1.4077	2.2128	0.7734
2545	1-(1-enyl-stearoyl)-2-arachidonoyl-GPE (P-18:0/20:4)*	Lipid	Plasmalogen	52475	LC/MS Pos Late	100008999	2511	752.559	9547058			HMDB05779	0.7516	1.0434	0.7611	0.9411	0.7918	0.6542	1.0464	1.3077	1.0151	0.8112	1.0344	0.8958	0.9335	1.181	0.9913	1.3722	1.22	1.1013	0.9726	1.0396	1.1489	0.8415	0.8478	1.0114	1.0469	0.8287	0.8419	1.1483	1.0041	0.8028	0.9959	1.1182	1.1874	1.156	1.1974	1.0431	0.595
2537	1-(1-enyl-stearoyl)-2-linoleoyl-GPE (P-18:0/18:2)*	Lipid	Plasmalogen	52748	LC/MS Pos Late	100009225	2633	728.559				HMDB11376	0.9771	1.4307	1.034	1.397	0.7983	0.5794	0.7848	0.6561	1.317	0.7132	0.6498	0.5566	0.8416	0.8198	0.8963	1.1395	1.1178	1.0954	1.4686	0.9486	1.564	0.8431	1.2256	1.0229	0.6813	1.0859	1.1799	1.2061	1.6475	0.8039	1.1671	1.2984	1.9922	1.8976	1.6606	0.7245	0.512
2536	1-(1-enyl-stearoyl)-2-oleoyl-GPE (P-18:0/18:1)	Lipid	Plasmalogen	52614	LC/MS Pos Late	100008919	2950	730.574		144371-68-6		HMDB11375	0.6595	1.7154	0.6542	1.6673	0.6421	0.5446	0.7113	0.4882	2.4025	1.6988	0.5207	0.3886	0.6	0.3089	0.3607	1.3329	1.4734	1.7294	2.248	1.0183	1.2012	0.5166	0.8168	0.5578	0.3906	1.336	1.6192	2.7202	2.7596	0.9817	1.1798	1.1607	1.9357	2.5327	2.7314	0.6623	0.2553
2565	1-(1-enyl-stearoyl)-GPE (P-18:0)*	Lipid	Lysoplasmalogen	39271	LC/MS Pos Late	100003001	1649	466.329					0.7882	1.1312	1.4513	0.9251	1.2316	0.6927	0.6092	0.9991	0.9571	0.91	0.402	0.4566	0.4393	0.3711	0.4585	0.6308	0.6597	0.5216	0.6987	0.5356	1.7827	0.87	1.5317	1.3502	1.1919	1.1506	1.1067	1.3974	1.3426	1.0539	1.5469	1.549	1.6559	1.6722	1.3988	1.9879	0.7853
5492	1,2,3-benzenetriol sulfate (1)	Xenobiotics	Chemical	48761	LC/MS Neg	100006373	1453	204.981					0.2532	0.2532	0.6772	0.3712	0.5145	0.2532	2.0331	0.2532	5.996	1.7442	0.2532	0.2532	0.2532	0.2532	0.2532	0.2532	0.2532	0.2532	1.9625	5.9138	0.2532	0.2532	0.6068	0.34	0.2714	1.6545	0.2532	0.2532	1.6557	0.4502	1.3228	1.3901	0.2532	0.2532	1.8664	0.4855	0.2532
5487	1,2,3-benzenetriol sulfate (2)	Xenobiotics	Chemical	48762	LC/MS Neg	100006374	1709	204.981					0.3447	0.2194	0.446	1	0.7306	0.2953	3.0184	0.1637	14.9765	4.1859	0.1637	0.1637	0.1637	0.7721	0.1637	0.3889	0.1637	0.1637	1.3089	6.118	0.1637	0.3782	1.058	0.8907	1.2236	3.2271	0.614	0.1637	2.6881	1.1309	1.7883	2.8674	0.2695	0.1637	2.3842	0.1768	0.2414
2119	1,2-dilinoleoyl-GPC (18:2/18:2)	Lipid	Phosphatidylcholine (PC)	52603	LC/MS Pos Late	100008903	2006	782.569	5288075	998-06-1		HMDB08138	1.3302	1.2967	1.1257	1.4372	0.7341	0.9212	0.7812	0.9028	1.2345	1.119	0.2509	0.313	0.5343	0.4996	0.5949	0.6618	1.1985	1.2476	1.0868	0.8323	1.3802	1.2759	0.9929	1.3613	1.343	1.1616	1.4892	1.0217	1.9516	1.0071	0.6245	0.805	1.0357	1.1251	0.8505	0.6979	0.3417
2201	1,2-dilinoleoyl-GPE (18:2/18:2)*	Lipid	Phosphatidylethanolamine (PE)	53174	LC/MS Pos Late	100009217	2083	740.523	9546812			HMDB09093	1.5707	2.0825	1.3209	1.5752	0.6945	0.9899	0.715	0.653	1.3648	1.0101	0.2957	0.3206	0.761	1.7034	0.7429	0.3663	1.3352	1.2501	1.106	0.6343	1.8233	1.7505	1.442	1.1547	1.1928	1.2179	1.5634	0.737	2.37	0.9189	0.6555	0.968	1.1236	1.3847	0.8995	0.557	0.3821
2042	1,2-dipalmitoyl-GPC (16:0/16:0)	Lipid	Phosphatidylcholine (PC)	19130	LC/MS Pos Late	100000657	2365	734.569	452110	63-89-8		HMDB00564	1.1449	1.3167	0.7766	1.0478	1.0872	0.7982	1.0125	0.8798	1.0983	0.9399	0.9711	0.9875	0.7883	1.0227	0.8848	0.8956	1.1436	0.8285	1.0468	0.9503	1.3918	1.1821	0.8227	1.2284	1.0365	0.9773	1.0392	0.9327	1.3564	0.9636	0.9088	1.4843	1.1408	1.236	0.9594	1.533	0.7183
2162	1,2-dipalmitoyl-GPE (16:0/16:0)*	Lipid	Phosphatidylethanolamine (PE)	57341	LC/MS Pos Late	100009204	2498	692.523	445468			HMDB08923	1.0274	3.0818	0.2403	1.0634	1.816	0.1333	0.4521	0.1333	1.0952	0.9017	0.3038	0.5349	0.2962	0.2181	0.3853	0.1333	0.6432	0.183	0.484	0.1333	3.0164	1.4506	0.6601	0.861	0.6346	1	0.8808	0.6657	2.6383	1.0248	1.1311	1.9929	1.7135	3.073	1.3274	1.9621	0.1333
1090	1,5-anhydroglucitol (1,5-AG)	Carbohydrate	Glycolysis, Gluconeogenesis, and Pyruvate Metabolism	20675	LC/MS Neg	100000580	802	163.061	64960	154-58-5	C07326	HMDB02712	1.0185	1.9656	1.0184	0.999	0.8869	0.6197	1.1643	0.8013	1.1025	0.9812	0.8444	0.9405	1.0146	0.976	0.5787	0.6934	0.6403	0.6773	0.9785	0.9424	1.2833	0.9841	1.4211	1.001	1.4629	0.9025	1.0821	1.0046	1.2312	1.0344	0.8257	0.8835	1.0705	1.3471	1.3039	1.2234	0.7885
1378	10-heptadecenoate (17:1n7)	Lipid	Long Chain Monounsaturated Fatty Acid	33971	LC/MS Neg	100001278	5555	267.233	5312435	29743-97-3		HMDB60038	1.4392	0.765	0.771	0.7557	0.8501	0.5431	0.392	1.4631	0.8638	0.8307	0.5441	0.4948	0.8726	0.6978	1.2859	1.5599	1.9218	1.0732	0.9268	1.5943	2.8385	3.6427	1.2272	1.4958	1.1937	1.9269	2.8666	0.8173	2.1248	2.2792	0.7391	1.0984	2.1924	1.9828	1.7392	0.6976	0.4648
1386	10-nonadecenoate (19:1n9)	Lipid	Long Chain Monounsaturated Fatty Acid	33972	LC/MS Neg	100001277	5780	295.264	5312513	73033-09-7		HMDB13622	1.2143	0.7294	0.9422	0.7644	1.036	0.6772	0.5031	1.3305	0.7391	0.7755	0.5244	0.4386	0.6987	0.7815	1.0271	1.3882	1.7957	1.0418	0.8792	1.2026	2.3782	2.7956	1.3266	1.4718	1.3316	1.8088	2.8615	0.8115	2.243	2.2415	0.7068	0.9363	2.3503	1.9328	1.6929	0.7467	0.4566
1814	12,13-DiHOME	Lipid	Fatty Acid, Dihydroxy	38395	LC/MS Neg	62	5137	313.238	10236635	263399-35-5	C14829	HMDB04705	0.9138	0.9803	0.4754	0.3748	0.7955	0.5336	0.4211	0.9714	0.3294	0.3228	0.441	0.2294	0.8991	0.675	0.801	1.0697	2.8075	0.6837	0.3901	1.3589	4.0198	2.4608	1.353	1.0895	1.2847	1.376	1.3147	0.4761	1.9381	1.8577	1.0197	1.9328	4.4128	1.9161	3.5864	0.5631	0.8805
1920	12-HHTrE	Lipid	Eicosanoid	57393	LC/MS Neg	1261	5175	279.197	5283141	54397-84-1	C20388	HMDB12535	1.2233	1.706	0.9672	0.7628	1.6755	1.2435	0.181	1.4106	0.4186	0.4816	0.098	0.0024	0.2594	0.0024	0.0078	0.0024	0.1155	0.0024	0.0024	0.0024	0.018	0.9357	1.2483	1.3378	0.6176	1.1277	1.0433	0.0024	1.1133	1.5726	0.5602	0.254	0.3035	1.3461	1.2644	1.5427	0.8588
1789	13-HODE + 9-HODE	Lipid	Fatty Acid, Monohydroxy	37752	LC/MS Neg	100002196	5275	295.228	43013				1.597	0.8776	0.7667	0.4897	0.8341	0.5052	0.3243	1.1224	0.4539	0.3917	0.3533	0.2807	0.7313	0.8691	0.3768	0.3748	0.6653	0.4394	0.7264	0.4112	5.7442	3.0534	1.8268	2.11	2.7434	1.6041	2.9358	0.4434	2.5232	2.3226	2.0841	2.944	5.7575	3.0526	4.9512	1.3589	0.8273
1785	16-hydroxypalmitate	Lipid	Fatty Acid, Monohydroxy	39609	LC/MS Neg	100002953	5236.2	271.228	10466	506-13-8	C18218	HMDB06294	1.055	1.3067	0.9368	0.8433	1.3842	0.6843	0.9545	6.505	1.0749	1.4095	0.6862	0.6842	0.901	2.0356	2.7879	8.3773	16.5208	2.5315	1.9009	4.8172	0.9966	0.8814	1.0034	1.1596	0.8094	0.9842	1.235	1.6832	1.2918	0.8203	0.8995	0.9061	1.42	1.033	0.9352	0.7538	0.4391
4308	1-aminocyclopropanecarboxylic acid	Xenobiotics	Food Component/Plant	38098	LC/MS Pos Early	100002230	2047	102.055	535	22059-21-8	C01234		1.5658	1.7837	0.843	1.876	0.9381	0.4312	1.7435	0.7847	1.2802	1.0648	2.6975	1.9565	1.8196	1.5535	1.8408	0.4142	0.5192	0.2707	0.6769	0.3425	1.9029	0.9088	1.0619	1.3292	1.246	0.3925	0.3686	0.2733	0.7404	0.4162	1.6128	1.6826	1.0935	1.6045	1.1897	0.4114	0.7187
2335	1-arachidonoyl-GPA (20:4)	Lipid	Lysophospholipid	46325	LC/MS Neg	100004442	5499	457.236		799268-65-8			1.4809	1.7892	1.2141	1.1324	1.9859	0.8052	0.833	1.2296	0.708	1.0014	0.5372	0.6276	1.1375	1.2403	0.9986	0.36	0.4203	0.3877	0.5998	0.7607	0.8577	2.0362	2.1895	2.4922	1.6804	0.9894	1.0325	1.506	0.85	1.392	1.5013	0.6908	0.6123	0.8005	0.8501	1.3388	0.8366
2374	1-arachidonoyl-GPC* (20:4)*	Lipid	Lysophospholipid	33228	LC/MS Pos Late	100001551	1460	544.34			C05208	HMDB10395	1.6707	1.1464	1.4971	1.4515	3.0543	0.764	1.4641	1.3644	1.2452	3.0426	0.9955	1.0831	0.6457	0.8423	0.9514	1.3512	0.8755	0.7601	0.7459	1.2193	2.0213	1.0692	0.7315	1.8963	1.7579	0.9826	0.8482	2.1552	0.7859	0.9517	0.9782	1.5229	0.9069	1.0045	0.8155	1.9236	0.856
2419	1-arachidonoyl-GPE (20:4n6)*	Lipid	Lysophospholipid	35186	LC/MS Pos Late	100001571	1470	502.293	42607465			HMDB11517	1.1804	1.4734	1.1123	0.9585	1.4083	0.7231	0.9231	0.8681	1.311	2.5489	0.5555	0.7383	0.5594	0.5195	0.7028	0.7722	0.7997	0.8794	1.0036	0.7716	1.8809	1.2415	0.7801	0.9964	1.1284	1.0478	1.3834	1.53	1.538	1.3151	0.9517	1.1182	1.182	1.3765	1.2694	1.2431	0.7035
2459	1-arachidonoyl-GPI* (20:4)*	Lipid	Lysophospholipid	34214	LC/MS Neg	100001654	5482	619.289				HMDB61690	1.0028	1.4725	2.9942	1.4965	2.435	0.6819	0.8909	0.9507	0.9972	0.904	0.2663	0.502	0.5532	0.3849	0.3214	1.117	1.678	0.6479	2.2465	0.9795	1.2933	1.0239	1.2144	1.9823	1.807	1.4284	1.3462	1.6412	1.3556	1.5302	0.5712	1.0325	0.8405	0.9314	0.98	0.9267	0.5086
2589	1-arachidonylglycerol (20:4)	Lipid	Monoacylglycerol	34397	LC/MS Neg	100001433	6250	303.233	5282281	35474-99-8	C13857	HMDB11549	1.9165	1.5659	0.879	0.7517	1.3183	0.4177	0.5878	0.9302	0.7312	0.5148	0.5128	0.8895	0.4394	0.4741	0.3774	1.0131	0.7423	0.582	0.9988	0.5738	4.5445	2.9496	1.4957	1.6222	0.9297	2.5157	2.3157	1.3424	1.9923	3.5849	0.5506	4.1772	3.2648	3.3202	2.4388	2.1799	0.7527
344	1-carboxyethylisoleucine	Amino Acid	Leucine, Isoleucine and Valine Metabolism	62558	LC/MS Neg	100020427	2628	202.108					1.5092	0.6184	0.5607	0.7489	0.792	1.277	0.3847	0.2564	0.7498	0.2378	0.5574	0.8643	1.1432	0.4683	1.5674	0.71	1.2129	0.9978	0.728	0.6174	1.1877	1.4308	1.371	1.495	1.6878	1.1095	0.4915	0.5893	1.2575	1.3045	1.7579	0.9469	0.7712	1.598	1.2505	0.9213	1.3225
299	1-carboxyethylleucine	Amino Acid	Leucine, Isoleucine and Valine Metabolism	62559	LC/MS Neg	100020425	2663	202.108					1.1722	0.6656	0.3402	0.3677	0.6838	1.0252	0.5495	0.2252	0.6022	0.3502	0.6885	0.8812	0.8958	0.4183	0.8576	0.3743	0.9448	0.8079	0.5165	0.3344	1.2158	1.1906	1.6409	1.2025	1.0731	1.2585	0.9748	0.7172	1.4347	1.2662	1.4074	1.045	1.3323	1.9411	1.3582	1.283	1.2855
138	1-carboxyethylphenylalanine	Amino Acid	Phenylalanine Metabolism	62566	LC/MS Neg	100020419	2844	236.093					1.1184	0.6347	0.3771	0.4943	0.5811	1.2639	0.5009	0.2786	0.6494	0.3366	0.8964	0.9406	1.8019	0.4201	1.1535	0.6679	1.3245	1.1249	0.8518	0.5705	1.344	0.9586	1.1916	1.1426	1.1098	1.4371	0.8378	0.4855	1.4134	1.1942	1.2061	1.0202	1.0829	1.2955	1.1622	0.9333	0.9798
156	1-carboxyethyltyrosine	Amino Acid	Tyrosine Metabolism	62564	LC/MS Neg	100020421	1846	252.088					1.8444	1.158	0.8246	0.5717	0.7988	1.7034	0.6857	0.5529	1.0271	0.5794	0.7449	0.9784	1.5304	0.3305	0.8111	0.9983	1.1115	0.7952	1.0016	0.6865	1.5867	1.2957	0.8152	1.3943	1.565	1.9782	1.2924	0.3958	1.8145	1.6944	1.5305	0.8298	0.7801	1.2894	1.7471	1.1663	0.9984
367	1-carboxyethylvaline	Amino Acid	Leucine, Isoleucine and Valine Metabolism	62562	LC/MS Neg	100020423	2008	188.093					1.0232	0.7923	0.3853	0.5779	0.7336	1.2804	0.4943	0.3371	0.6749	0.4829	0.5663	0.8721	0.8037	0.4163	1.2869	0.6	1.2793	1.0666	0.589	0.5251	1.2849	1.3995	1.4909	1.392	1.4187	1.1957	0.9483	0.6845	1.3903	1.5501	1.6673	0.8096	1.3574	2.417	1.3786	0.9768	1.5123
2588	1-dihomo-linolenylglycerol (20:3)	Lipid	Monoacylglycerol	48341	LC/MS Neg	100006121	6400	305.249					1.8462	2.776	0.4744	1.1778	0.8816	0.481	0.1605	0.2285	0.5683	0.5916	0.2741	0.462	0.3831	0.313	0.1605	0.4614	0.4827	0.4491	1.7475	0.3801	4.5899	4.6283	1.6742	1.8678	0.6714	3.435	3.109	1.5725	6.511	3.8331	1	3.3675	4.2417	4.2193	2.8282	2.3055	0.6088
2610	1-dihomo-linoleoylglycerol (20:2)	Lipid	Monoacylglycerol	35103	LC/MS Neg	100001483	6800	307.264					1.0884	0.6333	0.731	1	0.9077	0.7347	0.1301	0.3522	0.763	0.4965	0.6083	0.6202	0.2158	0.1301	0.2445	0.4192	0.2652	0.2439	1.4844	0.1301	8.0841	4.7276	1.5943	3.2082	1.2127	2.0255	5.0748	0.7573	2.9735	3.9177	0.5181	3.9315	4.6381	4.6258	3.614	1.1865	1.7219
2592	1-docosahexaenoylglycerol (22:6)	Lipid	Monoacylglycerol	35153	LC/MS Neg	100001481	6150	309.222				HMDB11587	1.5544	0.6102	0.4263	0.7765	1	0.2829	0.7137	1.2339	0.9433	0.567	0.5984	1.1335	0.2829	0.4962	0.3957	1.0495	0.2829	0.8593	0.7928	0.2829	6.5023	2.4469	1.2452	1.5895	1.1019	1.0662	1.4002	0.2829	0.6429	2.2062	0.2829	3.6311	2.9108	2.6925	1.8682	0.9882	0.6507
2584	1-linolenoylglycerol (18:3)	Lipid	Monoacylglycerol	34393	LC/MS Neg	100001435	6214	277.217	53480978	124151-74-2		HMDB11569	3.4871	1.8281	0.3268	0.836	1.0424	0.678	0.1662	0.1772	0.7398	0.3532	0.2346	0.5583	0.3242	0.3284	0.1662	0.5291	0.4179	0.4389	1.2552	0.1662	6.3241	2.5956	2.2242	1.5121	2.4412	3.6089	2.2399	0.2602	2.3907	2.3537	0.5522	5.1225	4.516	5.0723	1.9632	2.7374	0.4391
2358	1-linolenoyl-GPC (18:3)*	Lipid	Lysophospholipid	45951	LC/MS Pos Late	100005350	1410	518.324				HMDB10388	1.3185	0.8273	1.1779	1.1116	1.0523	0.9467	1.1631	1.4231	1.0128	1.5802	0.3647	0.7815	0.7707	0.5112	1.2007	1.2515	1.7396	1.8522	1.1278	1.5572	1.1563	0.6433	0.5771	1.4249	1.5922	0.9811	0.964	1.5025	1.2518	0.9302	0.9432	1.0369	0.787	0.9872	0.6076	0.9279	0.6533
2124	1-linoleoyl-2-arachidonoyl-GPC (18:2/20:4n6)*	Lipid	Phosphatidylcholine (PC)	52710	LC/MS Pos Late	100009131	1969	806.569				HMDB08147	1.6425	1.0971	1.2659	1.6429	1.2366	0.7068	1.0053	0.979	1.1616	1.075	0.442	0.5441	0.5762	0.6584	0.8718	1.3142	1.2537	1.3009	0.9054	1.4512	1.3529	1.0839	0.6682	1.7375	1.5789	1.056	1.0236	1.3943	1.1324	0.9947	0.5527	0.6439	0.6647	0.786	0.621	0.6247	0.3167
2203	1-linoleoyl-2-arachidonoyl-GPE (18:2/20:4)*	Lipid	Phosphatidylethanolamine (PE)	53189	LC/MS Pos Late	100009222	2030	764.523				HMDB09102	1.3355	2.158	1.1641	1.305	1.0382	0.8635	0.8026	0.7597	1.3628	1.6231	0.4529	0.5408	0.694	1.069	0.7312	0.6585	1.2169	1.2188	1.3116	0.8533	1.5173	1.2343	0.8046	1.073	1.1769	1.0114	1.3017	1.1548	1.8979	0.9886	0.7099	0.8581	0.8897	1.2337	0.8516	0.7305	0.414
2120	1-linoleoyl-2-linolenoyl-GPC (18:2/18:3)*	Lipid	Phosphatidylcholine (PC)	53176	LC/MS Pos Late	100009343	1939	780.554				HMDB08141	1.2749	0.6595	1.5051	1.3173	0.6629	1.4074	1.3721	1.8949	0.8258	0.6491	0.4497	0.6359	1.0398	0.6844	1.589	1.54	2.383	2.4831	1.0339	1.9035	0.9636	1.0718	1.0555	1.4388	1.7491	1.0055	1.0605	0.8253	1.2916	0.7642	0.9945	0.7013	0.6952	0.7066	0.5094	0.7457	0.8398
2583	1-linoleoylglycerol (18:2)	Lipid	Monoacylglycerol	27447	LC/MS Neg	100001040	6477	279.233	5283469	2277-28-3			3.2515	2.3827	0.4674	1.0687	1.1258	0.3023	0.1269	0.2869	0.6293	0.4494	0.3746	0.5343	0.4072	0.4463	0.245	0.5495	0.3285	0.2603	1.4693	0.1416	10.0251	5.1587	3.7044	2.4986	1.9019	5.0073	3.2254	0.3433	3.8113	3.567	0.3995	4.2084	4.2916	4.912	2.9329	2.3165	0.5258
2331	1-linoleoyl-GPA (18:2)*	Lipid	Lysophospholipid	52690	LC/MS Neg	100009082	5483	433.236				HMDB07856	1.2089	1.258	1.9056	0.8592	1.3167	0.6532	0.7471	0.3737	0.5688	0.7228	0.4871	0.6228	1.3447	1.2081	0.8568	0.2708	0.3375	0.5904	0.8649	0.3756	1.5377	3.2175	1.9703	1.9619	1.1634	1.3703	0.9718	0.8819	1.8191	1.2497	1.5129	0.9967	0.7414	1.1686	0.622	1.0455	0.661
2356	1-linoleoyl-GPC (18:2)	Lipid	Lysophospholipid	34419	LC/MS Pos Late	100001395	1465	520.34	11988421		C04100	HMDB10386	1.1166	1.2572	1.2566	1.1054	1.1586	0.7198	0.8712	0.7903	1.2227	3.6823	0.3531	0.4703	0.567	0.4253	0.4732	0.7325	0.8775	0.9918	1.1227	0.6792	1.826	1.1057	0.7951	1.4705	1.5803	1.0082	1.1956	1.4677	1.4339	0.9831	0.9604	1.2206	1.1311	1.3181	0.9747	1.0582	0.5684
2407	1-linoleoyl-GPE (18:2)*	Lipid	Lysophospholipid	36600	LC/MS Pos Late	100001570	1482	478.293	52925130			HMDB11507	1.437	1.5339	1.1055	1.0295	1.0949	0.8379	0.6698	0.6104	1.2713	1.3311	0.3135	0.4051	0.5976	0.4503	0.4362	0.5196	0.8312	0.9385	1.2013	0.5355	2.4942	1.9644	1.1178	0.9705	1.4998	1.5899	2.1023	0.9693	2.4005	1.603	0.8755	1.0473	1.6544	1.7781	1.461	0.8467	0.4129
2446	1-linoleoyl-GPG (18:2)*	Lipid	Lysophospholipid	54885	LC/MS Neg	100009227	5516	507.273					1.1436	0.9778	1.229	0.773	1.2414	0.6556	1.0121	1.1427	0.8787	0.7058	0.6172	0.575	0.8105	0.5082	0.9676	0.831	1.0872	0.8686	0.8211	0.7618	1.977	1.4217	0.9513	1.4837	1.2585	0.9373	1.3025	1.0182	1.6721	1.2366	1.0357	1.5889	1.7543	1.7785	1.1401	0.9879	0.5
2454	1-linoleoyl-GPI* (18:2)*	Lipid	Lysophospholipid	36594	LC/MS Neg	100001778	5494	595.289					1.1238	1.6685	3.7058	2.0799	1.8023	0.8294	0.7517	0.6777	1.2184	0.932	0.2053	0.2581	0.4886	0.3288	0.3293	0.614	1.296	0.6225	1.9597	0.5416	1.3254	1.1933	1.1789	2.0744	1.4792	1.5618	1.4606	1.5318	1.4123	1.2739	0.5445	0.8392	1.068	1.1702	0.7885	0.6921	0.4149
2437	1-linoleoyl-GPS (18:2)*	Lipid	Lysophospholipid	43676	LC/MS Neg	100004606	5500	520.268					0.8847	0.5272	2.0768	1.6306	0.9415	0.2101	0.1927	0.342	0.2403	0.2535	0.2032	0.0703	0.2936	15.5439	0.0588	0.0588	0.0634	0.0588	0.221	0.1157	0.8462	1.5343	1.7708	1.9066	2.9131	1.695	2.0662	1.2113	2.0995	1.6882	1.036	0.9529	2.7261	1.3374	0.964	2.7924	0.6439
86	1-methyl-4-imidazoleacetate	Amino Acid	Histidine Metabolism	32350	LC/MS Pos Early	100001208	2064	141.066	75810	2625-49-2	C05828	HMDB02820	1.0751	1.9721	3.5375	1.3421	0.8265	1.2832	1.108	0.6575	1.051	0.644	0.7851	0.5554	1.2796	1.1199	0.5319	0.6076	0.6897	0.8105	0.8024	0.6321	1.9103	1.1184	2.1375	1.7148	2.5955	0.7014	1.0994	0.4589	0.7471	0.949	1.5483	1.0786	1.2601	1.3809	1.3445	0.6562	0.789
87	1-methyl-5-imidazoleacetate	Amino Acid	Histidine Metabolism	62946	LC/MS Pos Early	100002910	1989	141.066	6451814	4200-48-0		HMDB04988	0.7804	5.8554	7.555	0.8209	1.0048	0.7473	1.1555	0.943	0.8761	0.5429	2.4146	1.0703	4.9076	6.2809	1.8405	0.5114	0.408	0.8937	1.1233	0.6093	1.0994	0.7974	5.6316	1.7209	2.6996	1.0031	0.6905	0.7485	0.5222	0.7279	1.6625	4.3969	1.1695	4.0382	1.9551	0.8581	0.9062
85	1-methylhistamine	Amino Acid	Histidine Metabolism	43831	LC/MS Pos Early	100001204	3040	126.103	3614	501-75-7	C05127	HMDB00898	1.1697	3.4155	2.4117	1.5642	1.3498	0.8155	0.5881	1.6622	0.8121	0.8498	0.7284	0.421	1.9615	0.9948	0.421	0.421	0.5373	0.676	0.4687	0.421	0.7688	1.1025	2.3074	1.0052	1.6322	0.421	1.2161	0.421	2.6291	2.1715	0.8216	1.2241	0.4918	0.9505	0.421	1.9439	0.421
68	1-methylhistidine	Amino Acid	Histidine Metabolism	30460	LC/MS Neg	100001051	1227	168.078	92105	332-80-9	C01152	HMDB00001	0.7743	0.9465	0.5493	0.8361	0.9397	0.9678	0.7117	1.0509	1.0364	0.7383	1.409	1.736	1.4715	1.9262	1.0694	0.9348	0.7938	1.0995	0.9478	1.0399	0.9919	1.0081	1.7719	1.2415	1.3045	0.4942	0.9422	0.7387	0.6041	0.8777	1.585	1.3034	1.289	1.0316	1.5085	1.1214	1.2315
3811	1-methylhypoxanthine	Nucleotide	Purine Metabolism, (Hypo)Xanthine/Inosine containing	57771	LC/MS Pos Early	100004644	1530	151.061	70765	1125-39-9		HMDB13141	1.6136	2.1531	3.1743	0.4596	0.6527	1	1.0549	0.7482	0.2685	0.1891	1.2675	1.5015	1.2882	2.7152	0.3662	0.9285	1.0286	0.8983	0.8773	0.9068	0.8274	0.2253	3.9585	0.4951	5.5146	0.9682	0.5915	0.1891	0.5798	1.4059	1.4915	1.1378	1.95	1.8224	2.1698	0.7789	1.8537
2030	1-myristoyl-2-arachidonoyl-GPC (14:0/20:4)*	Lipid	Phosphatidylcholine (PC)	53195	LC/MS Pos Late	100009139	1914	754.538				HMDB07883	1.7794	0.8192	1.3555	1.3071	1.02	1.0803	1.4387	1.7043	1.2937	0.8516	0.5608	0.7239	0.9199	0.6694	1.2063	1.2901	1.2755	1.1218	1.0145	1.689	1.1671	0.8307	1.1518	1.4739	1.7036	0.9855	0.8837	1.16	0.8481	0.8447	0.9781	0.6738	0.7327	0.7911	0.5763	1.4105	0.7922
2026	1-myristoyl-2-palmitoyl-GPC (14:0/16:0)	Lipid	Phosphatidylcholine (PC)	19258	LC/MS Pos Late	100000672	2147	706.538	129657	69525-80-0		HMDB07869	1.3265	1.375	0.5203	0.9654	0.8877	0.835	1.0463	0.6983	1.3809	1.2858	0.4404	0.7709	0.6112	0.7201	0.6193	0.8004	1.4503	1.0854	1.5052	1.2079	1.2951	1.1663	0.862	1.0448	0.7119	1.1203	1.1163	1.1608	1.724	0.9688	1.0312	0.8825	0.916	1.312	1.0861	1.2998	0.4633
2575	1-myristoylglycerol (14:0)	Lipid	Monoacylglycerol	35625	LC/MS Neg	100001618	6353.3	227.202	79050	75685-84-6	C01885	HMDB11561	1.0978	1.2655	0.5043	0.5043	1.1036	2.4612	0.5043	0.8856	1.3066	0.5043	0.5043	0.6011	0.6399	0.5043	0.5043	0.927	0.9776	0.9721	0.9923	0.5043	2.2153	0.988	0.7976	0.9548	0.75	1.1774	1.2847	0.5043	1.3171	1.0077	0.7739	1.7412	2.1169	2.6133	1.1901	1.481	0.7152
2197	1-oleoyl-2-arachidonoyl-GPE (18:1/20:4)*	Lipid	Phosphatidylethanolamine (PE)	55041	LC/MS Pos Late	100009219	2200	766.538				HMDB09069	1.2623	2.0816	1.0082	1.4635	1.1093	1.1295	1.1579	0.9241	1.6192	1.8949	0.5342	0.8444	0.7612	0.8771	0.694	0.8559	1.0651	1.2577	1.1966	0.9918	1.0935	0.9805	0.6848	0.6757	0.8721	1.2493	1.0574	1.6029	1.4158	1.2838	0.8236	0.5686	0.8692	1.0572	0.8542	1.243	0.6185
2118	1-oleoyl-2-docosahexaenoyl-GPC (18:1/22:6)*	Lipid	Phosphatidylcholine (PC)	52697	LC/MS Pos Late	100009130	2011	832.585				HMDB08123	1.5821	1.0597	1.1245	2.0083	1.6847	1.0825	1.5461	0.9588	1.3951	2.0461	0.8308	0.6498	0.6496	1.0325	0.964	1.7469	1.0212	1.1919	0.8656	0.932	1.596	1.0652	0.8208	1.9315	1.2249	1.2176	0.6175	0.9788	0.5805	0.5783	0.7167	1.0469	1.1302	0.5212	0.5694	0.2339	0.278
2200	1-oleoyl-2-docosahexaenoyl-GPE (18:1/22:6)*	Lipid	Phosphatidylethanolamine (PE)	53209	LC/MS Pos Late	100009220	2119	790.538					1.6627	1.1987	1.2944	2.7835	1.7972	2.0223	1.6068	2.2875	1.2521	2.2651	0.7396	0.789	0.8233	0.5146	1.2404	2.0386	2.2399	4.0547	1.462	2.0681	1	1.0621	0.5548	0.8105	0.891	0.7287	0.9607	1.8587	0.8302	0.7018	0.29	0.3201	0.5717	0.5673	0.29	0.29	0.4806
2108	1-oleoyl-2-linoleoyl-GPC (18:1/18:2)*	Lipid	Phosphatidylcholine (PC)	52453	LC/MS Pos Late	100008981	2165	784.585					1.236	1.1238	1.1336	1.3789	0.9595	1.0916	0.9669	0.9586	1.2808	1.4725	0.5384	0.4993	0.8531	0.8662	0.6866	0.9031	0.9784	1.2701	0.9391	0.9599	1.0216	1.0407	1.0565	1.1634	1.1851	1.1288	1.2038	1.0576	1.3038	1.0852	0.6344	0.7303	0.9637	1.0394	1.0234	0.7862	0.5069
2194	1-oleoyl-2-linoleoyl-GPE (18:1/18:2)*	Lipid	Phosphatidylethanolamine (PE)	52687	LC/MS Pos Late	100009078	2270	742.538	9546753			HMDB05349	1.267	2.3537	0.9742	1.6352	0.7447	1.1754	0.624	0.5605	1.5275	1.4944	0.2168	0.3624	0.6928	0.6236	0.3664	0.4219	1.0258	1.421	1.1208	0.5347	1.4119	1.3492	1.3919	0.789	0.7119	1.3009	1.468	1.043	2.0757	1.1254	0.5582	0.7324	1.1004	1.0836	1.0769	0.4629	0.3779
2582	1-oleoylglycerol (18:1)	Lipid	Monoacylglycerol	21184	LC/MS Neg	100000924	6650	281.249	5283468	111-03-5		HMDB11567	2.2866	3.6209	0.2432	0.9219	0.9674	0.4227	0.0996	0.1965	1.1104	0.6769	0.1963	0.3989	0.2157	0.2091	0.0889	0.3633	0.2409	0.1897	1.699	0.106	12.3304	7.3403	2.4597	2.6382	2.4428	6.6579	6.4439	0.843	10.0791	7.6832	0.2707	4.6259	7.871	7.6147	6.948	2.3483	0.2782
2353	1-oleoyl-GPC (18:1)	Lipid	Lysophospholipid	48258	LC/MS Pos Late	100001272	1540	522.355	16081932	19420-56-5		HMDB02815	1.0486	1.4759	0.6857	1.1501	1.1686	0.6342	0.6591	0.6549	1.437	3.2086	0.3523	0.4895	0.4739	0.4612	0.3985	0.6631	0.873	1.1808	1.1471	0.7092	1.6584	1.0055	0.6745	1.0712	1.0646	1.2611	1.3667	2.6142	1.6619	1.3628	0.9357	0.8572	1.1874	1.1609	1.2665	0.8954	0.4118
2405	1-oleoyl-GPE (18:1)	Lipid	Lysophospholipid	35628	LC/MS Pos Late	100001569	1554	480.308	9547071	89576-29-4		HMDB11506	1.3027	2.5833	0.9146	1.4319	1.3094	0.7998	0.7012	0.5804	1.8314	2.1869	0.3098	0.5335	0.5691	0.4727	0.4195	0.5394	1.1267	1.2848	1.4159	0.6799	2.2766	1.5245	1.0259	0.9488	0.9623	1.6748	1.8841	2.2519	2.5785	1.8117	0.8532	0.8862	1.472	1.4585	1.4555	0.705	0.3943
2444	1-oleoyl-GPG (18:1)*	Lipid	Lysophospholipid	45968	LC/MS Neg	100005716	5610	509.288					0.8236	1.2553	0.9741	1.1703	1.3801	0.8894	1.3746	1.0103	1.7201	1.5612	0.76	0.6852	0.7066	0.5007	0.733	0.5747	0.9196	1.1427	1.1693	0.7656	1.1237	0.3071	0.9897	1.2272	0.6639	1.1392	0.8488	1.7402	0.9335	1.3567	1.3892	0.9751	0.9664	1.6388	1.4668	1.0534	0.5265
2452	1-oleoyl-GPI (18:1)	Lipid	Lysophospholipid	36602	LC/MS Neg	100001777	5599	597.304					1.0937	1.5258	2.8169	2.1454	1.3955	1.1414	0.4991	0.6122	1.3952	1.6673	0.1455	0.1852	0.3236	0.2417	0.129	0.4392	0.7683	0.4857	1.7266	0.4829	0.7353	1.1632	1.5295	2.0754	1.3295	2.0969	1.3512	1.6598	2.06	1.6201	0.5697	0.6654	0.7722	1.1271	0.8505	0.8468	0.3679
2435	1-oleoyl-GPS (18:1)	Lipid	Lysophospholipid	19260	LC/MS Neg	100000630	5607	522.284	9547099	326589-90-6		HMDB61694	1.1443	1.2492	3.8223	0.5894	1.7433	0.5789	0.3871	0.5168	0.3364	0.4568	0.0424	0.0933	0.1115	0.5036	0.0635	0.0401	0.0545	0.0537	0.1661	0.1491	0.4356	1.5245	5.6224	3.2253	4.9294	4.4163	3.0651	0.4003	3.6301	3.0219	2.182	1.1633	0.7318	2.2721	1.2797	5.9557	0.8557
2073	1-palmitoleoyl-2-linolenoyl-GPC (16:1/18:3)*	Lipid	Phosphatidylcholine (PC)	53180	LC/MS Pos Late	100009345	1850	754.538				HMDB08008	1.4203	1.4419	1.2758	1.2675	0.4864	1.0368	0.7546	1.0899	1.3524	0.6914	0.2194	0.4313	0.6562	0.445	0.6404	1.0226	2.3643	1.804	1.4678	1.6503	0.9393	1.1014	1.2594	0.6525	0.9825	1.2314	1.2925	1.3527	1.6317	1.0209	0.8354	0.6858	0.8881	1.0175	0.7414	0.9602	0.6422
2579	1-palmitoleoylglycerol (16:1)*	Lipid	Monoacylglycerol	52431	LC/MS Neg	100008952	6094	253.217				HMDB11565	0.7631	6.3186	0.1217	0.6954	0.3302	0.1217	0.1217	0.2291	1.5959	1	0.1217	0.8696	0.1217	0.1217	0.1217	0.4192	0.349	0.1217	0.8471	0.1217	6.3526	1.4892	0.5065	0.4392	0.1217	1.6102	2.4353	0.3787	6.914	3.9879	0.1217	7.545	10.1313	13.7852	4.6917	1.6399	0.1217
2344	1-palmitoleoyl-GPC* (16:1)*	Lipid	Lysophospholipid	33230	LC/MS Pos Late	100001511	1450	494.324	24779461			HMDB10383	1.6228	1.9542	0.7324	1.1603	1.1537	0.9465	1.0134	0.8094	1.9081	2.408	0.427	0.9866	0.7674	0.6046	0.543	1.0897	1.3872	1.8005	1.2851	1.4328	1.5253	0.8587	0.5225	0.9591	0.7936	1.5494	0.9061	3.7464	1.464	1.5693	0.6778	0.6968	1.1023	1.197	1.1878	0.5322	0.5074
2060	1-palmitoyl-2-arachidonoyl-GPC (16:0/20:4n6)	Lipid	Phosphatidylcholine (PC)	52462	LC/MS Pos Late	100008914	2091	782.569	10747814	35418-58-7		HMDB07982	1.3289	1.1096	1.0055	1.2109	1.3734	0.9321	1.1686	1.1975	1.1521	0.8624	1.0413	0.9945	0.6935	1.1163	0.8828	1.2929	1.0898	0.9366	0.8624	1.14	1.2344	0.9651	0.8022	1.1739	1.1531	0.9699	0.9787	1.1476	0.9089	1.0604	0.8256	1.0126	0.8306	0.8484	0.8209	1.061	0.696
2171	1-palmitoyl-2-arachidonoyl-GPE (16:0/20:4)*	Lipid	Phosphatidylethanolamine (PE)	52464	LC/MS Pos Late	100008990	2198	740.523	9546800			HMDB05323	1.4001	1.8787	0.9783	1.3134	1.297	0.9212	0.9094	0.766	1.5279	1.363	0.7172	0.8502	0.6799	0.7362	0.8604	0.5905	0.9022	0.8656	1.0338	0.6416	1.5192	1.2148	0.8754	1.0122	1.194	1.1236	1.1075	0.9585	1.5947	1.0882	1.1319	1.0356	1.1918	1.4829	1.1285	0.9757	0.6045
2286	1-palmitoyl-2-arachidonoyl-GPI (16:0/20:4)*	Lipid	Phosphatidylinositol (PI)	52467	LC/MS Pos Late	100008993	2567	876.56				HMDB09789	1.2052	1.5186	0.6661	1.3653	1.0279	0.5426	0.8992	0.6983	1.5101	1.1394	0.7827	0.6295	0.4801	0.4233	0.3257	0.8245	0.9721	1.1104	0.9416	0.5969	1.2344	0.8396	0.6406	1.9073	1.9367	1.1436	1.1411	1.0698	1.9242	1.0883	1.2461	0.9598	1.0565	1.468	1.0771	0.9249	0.2307
2056	1-palmitoyl-2-dihomo-linolenoyl-GPC (16:0/20:3n3 or 6)*	Lipid	Phosphatidylcholine (PC)	52454	LC/MS Pos Late	100008985	2199	784.585					1.0773	1.4716	0.4725	1.3415	0.7451	0.8036	0.6369	0.6217	1.4662	1.3508	0.2927	0.6551	0.367	0.4192	0.3684	0.7369	1.2912	1.2744	1.4093	0.811	1.2217	0.9381	0.7071	0.7055	0.6212	1.139	1.5609	1.6663	1.9319	1.4229	1.2503	1.1518	1.31	1.2922	1.2493	1.0619	0.4613
2066	1-palmitoyl-2-docosahexaenoyl-GPC (16:0/22:6)	Lipid	Phosphatidylcholine (PC)	52610	LC/MS Pos Late	100008915	2023	806.569	6441886	59403-54-2		HMDB07991	1.6231	0.6763	1.2534	1.5951	1.931	1.0588	1.7665	1.9072	1.1738	0.9913	1.645	0.9882	0.82	0.9949	1.6067	1.3726	1.1256	1.0051	0.6466	1.102	1.7663	1.1298	0.764	1.9195	1.8084	0.5326	0.4729	0.6888	0.3517	0.452	1.1484	1.2119	0.7503	0.7494	0.4325	0.7577	0.6787
2173	1-palmitoyl-2-docosahexaenoyl-GPE (16:0/22:6)*	Lipid	Phosphatidylethanolamine (PE)	52465	LC/MS Pos Late	100008991	2119	764.523	9546799			HMDB05324	1.5445	0.7168	1.1832	1.4956	1.5313	1.2317	1.63	1.5621	1.2967	1.2277	1.1348	0.9815	0.8615	0.6828	1.5993	1.0214	1.0458	1.1338	0.6972	0.8034	1.8094	1.2335	0.8925	1.375	1.4452	0.5509	0.6473	0.5751	0.5064	0.5694	1.1596	0.8553	0.9382	1.0185	0.4889	0.6452	0.6357
2049	1-palmitoyl-2-linoleoyl-GPC (16:0/18:2)	Lipid	Phosphatidylcholine (PC)	42446	LC/MS Pos Late	1537	2160	758.569	5287971	40811-94-7		HMDB07973	1.1022	1.2143	1.0079	1.1539	0.9529	0.9852	0.9508	0.9069	1.1446	0.9631	0.6081	0.7179	0.7574	0.8345	0.7207	0.8444	1.0909	1.0136	1.0256	0.7855	1.1443	1.0448	1.0307	1.1136	1.1569	1.0276	1.1017	1.0418	1.182	1.1179	0.9334	0.9587	1.0167	1.0674	0.9531	0.9921	0.6629
2168	1-palmitoyl-2-linoleoyl-GPE (16:0/18:2)	Lipid	Phosphatidylethanolamine (PE)	42449	LC/MS Pos Late	100001870	2275	716.523	9546747			HMDB05322	1.1815	1.9444	0.7805	1.0789	0.7663	0.9374	0.6509	0.4157	1.2528	1.1042	0.2899	0.4946	0.7191	0.6205	0.5282	0.2607	0.7748	0.6995	1.1713	0.2948	1.5773	1.3201	1.2325	0.897	1.0626	1.1629	1.3124	0.6407	1.9906	1.0911	1.1614	0.936	1.4732	1.8695	1.1632	0.8965	0.4433
2284	1-palmitoyl-2-linoleoyl-GPI (16:0/18:2)	Lipid	Phosphatidylinositol (PI)	52450	LC/MS Pos Late	1528	2730	852.56				HMDB09784	1.7291	1.8382	1.0807	1.6443	0.8248	0.7881	0.8186	0.7503	1.3726	1.0745	0.8249	0.453	0.6366	0.644	0.6833	0.6055	0.81	0.9071	0.898	0.446	1.5648	1.2398	0.9934	2.6189	2.6099	1.5782	1.4827	1.1657	2.0601	1.0018	1.5966	0.9982	1.396	1.8024	1.0083	1.7158	0.504
2046	1-palmitoyl-2-oleoyl-GPC (16:0/18:1)	Lipid	Phosphatidylcholine (PC)	52461	LC/MS Pos Late	1539	2358	760.585	6436017	26853-31-6;26853-31-6		HMDB07972	1.0876	1.933	0.5202	1.2249	0.8596	0.9009	0.8298	0.7613	1.8722	1.8708	0.5519	0.8436	0.6504	0.7848	0.4915	1.044	1.5228	1.9453	1.7386	1.0891	1.1558	0.953	0.7179	0.7741	0.5925	1.5903	1.6826	2.0512	2.0229	1.7643	0.9548	0.956	1.2433	1.231	1.4593	0.7985	0.4278
2166	1-palmitoyl-2-oleoyl-GPE (16:0/18:1)	Lipid	Phosphatidylethanolamine (PE)	19263	LC/MS Pos Late	1526	2509	718.538	5283496	26662-94-2		HMDB05320	1.0499	5.237	0.4167	1.1583	0.7196	0.6445	0.6188	0.3684	2.9401	3.0753	0.3186	0.744	0.5656	0.4896	0.3932	0.3357	1.1859	1.226	2.6158	0.392	1.7465	1.2387	0.6657	0.5359	0.4209	2.1744	2.2708	2.032	3.9209	2.4034	0.9613	1.0387	2.0419	2.6994	2.0195	0.8513	0.2029
2282	1-palmitoyl-2-oleoyl-GPI (16:0/18:1)*	Lipid	Phosphatidylinositol (PI)	52669	LC/MS Pos Late	100009066	3140	854.575				HMDB09783	1.2517	2.066	0.3103	1.8292	0.8375	0.6893	0.4337	0.3364	2.6396	2.601	0.414	0.3955	0.1714	0.2896	0.2735	0.3841	0.6983	1.1171	1.1297	0.3118	1.3764	1	0.623	1.0049	0.8455	1.3044	2.0198	1.9163	2.8091	1.7152	1.145	0.8943	1.6943	1.8804	1.4242	0.6799	0.1714
2043	1-palmitoyl-2-palmitoleoyl-GPC (16:0/16:1)*	Lipid	Phosphatidylcholine (PC)	52470	LC/MS Pos Late	100008984	2160	732.554				HMDB07969	1.2238	3.2093	0.343	1.1415	0.5885	0.6815	0.7451	0.5325	2.1818	2.3847	0.4516	0.7042	0.5076	0.5242	0.369	0.7901	1.424	1.4117	1.862	0.9852	1.1368	1.0135	0.5428	0.6077	0.3924	1.4388	1.6181	1.9307	2.999	1.4998	1.0162	0.9865	1.4783	2.0121	1.8194	0.7086	0.4229
2044	1-palmitoyl-2-stearoyl-GPC (16:0/18:0)	Lipid	Phosphatidylcholine (PC)	52616	LC/MS Pos Late	100008921	2653	762.601		59403-51-9		HMDB07970	1.1231	1.0388	0.6499	1.1842	1.4962	0.7509	1.185	0.9745	1.1079	0.8953	0.7117	0.9246	0.5415	0.8342	0.8209	0.9764	1.1008	0.8275	1.0318	1.0874	1.638	1.0614	0.6686	1.2502	1.106	0.9755	1.0654	1.0021	1.2457	0.9979	0.7451	1.6347	1.0363	1.1503	0.7729	2.0925	0.4258
2165	1-palmitoyl-2-stearoyl-GPE (16:0/18:0)*	Lipid	Phosphatidylethanolamine (PE)	57388	LC/MS Pos Late	100009205	2850	720.554	5326793			HMDB08925	1.2767	1.9853	0.6487	1.3354	1.9688	0.8022	0.9232	0.6296	1.4125	0.9873	0.363	0.7134	0.4413	0.5539	0.5112	0.3188	0.7253	0.4537	0.6772	0.3751	2.5059	1.4548	0.8534	1.1127	1.2954	0.8899	1.0127	1.0429	1.6862	0.878	1.2338	1.6537	1.2834	1.7103	1.0355	2.393	0.3544
2342	1-palmitoyl-GPC (16:0)	Lipid	Lysophospholipid	33955	LC/MS Pos Late	100001263	1525	496.34	86554	17364-16-8		HMDB10382	1.0446	1.1135	0.8243	0.9755	1.2406	0.6417	0.8199	0.7341	1.103	1.0978	0.5615	0.6757	0.5816	0.5958	0.6216	0.5934	0.8011	0.8259	0.814	0.6782	1.461	1.0245	0.8174	1.1845	1.2584	0.9614	1.0537	1.3875	1.0773	1.0264	1.1971	1.1273	1.0949	1.1441	1.0368	1.0673	0.5884
2396	1-palmitoyl-GPE (16:0)	Lipid	Lysophospholipid	35631	LC/MS Pos Late	100001567	1544	454.293	9547069	53862-35-4		HMDB11503	1.3854	1.5864	0.9135	1.125	1.7096	0.8537	0.9354	0.729	1.1969	1.3304	0.6353	0.8302	0.7148	0.5814	0.9363	0.4876	0.797	0.6504	0.8684	0.5102	2.3557	1.4343	0.9579	1.2634	1.5017	0.9946	0.995	1.1219	1.4072	0.9446	1.766	1.2287	1.4636	1.6551	1.005	1.031	0.6763
2447	1-palmitoyl-GPI* (16:0)	Lipid	Lysophospholipid	35305	LC/MS Neg	100001655	5564	571.289				HMDB61695	1.1494	1.7827	3.6432	2.4157	2.1365	0.8253	0.5225	0.7196	0.8982	0.9884	0.317	0.3774	0.4307	0.3526	0.2701	0.4289	0.2343	0.3454	2.3372	0.3773	0.823	1.0136	1.6913	1.974	1.2923	1.3732	1.0075	0.7204	1.428	0.9925	0.9658	1.0481	1.1017	1.4188	1.0482	1.0907	0.5201
2433	1-palmitoyl-GPS (16:0)*	Lipid	Lysophospholipid	46130	LC/MS Neg	100005805	5572	496.268	9547100				0.4752	0.4366	1.8227	0.413	1.1971	0.3783	0.2487	0.4473	0.2487	0.4409	0.2487	0.2487	0.2487	0.2487	0.2487	0.2487	0.2487	0.2487	0.2487	0.2487	0.2487	0.579	2.3051	1.6676	2.0045	1.9472	1.1984	0.3802	1.1154	1.3817	0.7516	0.5239	0.831	1.0912	0.6344	1.9148	0.9088
89	1-ribosyl-imidazoleacetate*	Amino Acid	Histidine Metabolism	61868	LC/MS Pos Early	100001668	2006	259.092	5117448	29605-99-0	C05131	HMDB02331	0.7047	1.3391	2.5315	1.2534	0.7233	0.9244	0.7479	0.8904	1.0384	0.8387	0.4002	0.2191	1.2269	0.7445	0.4656	0.8667	0.8988	0.9558	0.8389	0.9721	1.2071	0.9919	1.6766	1.1428	1.3412	1.5607	1.3567	0.8008	1.392	1.0394	1.0754	1.0628	0.9719	1.1038	1.2704	0.9472	1.0127
2094	1-stearoyl-2-arachidonoyl-GPC (18:0/20:4)	Lipid	Phosphatidylcholine (PC)	42450	LC/MS Pos Late	100001869	2300	810.601	16219824	35418-59-8		HMDB08048	1.3379	0.997	1.1546	1.3837	1.5543	0.9769	1.3893	1.3775	1.2052	0.9775	1.2129	1.0367	0.7405	1.1468	1.1309	1.3351	1.003	0.8451	0.6674	1.0666	1.4549	1.0541	0.739	1.3137	1.4054	0.8974	0.9068	1.153	0.7938	0.9509	0.756	0.9631	0.796	0.8244	0.7386	1.0847	0.704
2188	1-stearoyl-2-arachidonoyl-GPE (18:0/20:4)	Lipid	Phosphatidylethanolamine (PE)	52447	LC/MS Pos Late	100008977	2424	768.554	5289133			HMDB09003	1.2085	1.3321	1.0251	1.2741	1.2681	1.0695	1.0962	1.034	1.3404	1.1463	0.7151	0.9229	0.7489	0.7252	0.9935	0.8107	1.0065	0.9606	0.8244	0.8196	1.3651	1.1172	0.85	1.0218	1.177	0.9854	1.0108	1.263	1.1403	0.9683	0.8338	0.8992	0.7937	1.0286	0.9795	1.1869	0.6498
2301	1-stearoyl-2-arachidonoyl-GPI (18:0/20:4)	Lipid	Phosphatidylinositol (PI)	52449	LC/MS Pos Late	100000616	3000	904.591		383907-33-3		HMDB09815	1.3269	1.4234	0.9551	1.0978	1.4041	0.862	1.1181	1.141	1.0906	1.0508	0.9335	0.728	0.6776	0.9038	0.8062	1.3399	0.9719	1.1493	0.9162	1.0162	1.2769	1.0222	0.7556	1.3582	1.4023	1.0716	0.9838	1.4899	1.1163	1.1484	0.8323	0.9139	0.8993	0.7854	0.7334	1.1647	0.5104
2257	1-stearoyl-2-arachidonoyl-GPS (18:0/20:4)	Lipid	Phosphatidylserine (PS)	52235	LC/MS Pos Late	100001872	2565	812.544				HMDB12383	0.6327	0.8806	0.9684	1.0001	0.4269	1.0143	1.4371	1.4002	1.0647	1.0204	1.7042	0.7362	0.7716	1.5813	1.1232	0.7005	1.8217	0.964	0.7552	0.4269	1.5927	1	0.7292	1.2322	1.4263	0.983	0.9046	1.207	0.8406	0.7344	1.2057	1.3818	1.1997	1.2197	1.01	0.9748	0.7705
2100	1-stearoyl-2-docosahexaenoyl-GPC (18:0/22:6)	Lipid	Phosphatidylcholine (PC)	52611	LC/MS Pos Late	100008916	2197	834.601		59403-52-0		HMDB08057	1.4789	0.6782	1.1701	1.5819	1.8209	0.8518	1.8746	2.1011	1.2111	1.2023	1.8784	1.0229	0.7882	0.9883	2.1795	1.1059	1.0321	0.8726	0.7231	0.8569	2.0785	1.2777	0.5463	1.8306	2.035	0.5862	0.5136	0.6717	0.3573	0.4122	1.03	1.2445	0.7269	0.836	0.4095	1.0117	0.606
2192	1-stearoyl-2-docosahexaenoyl-GPE (18:0/22:6)*	Lipid	Phosphatidylethanolamine (PE)	52466	LC/MS Pos Late	100008992	2317	792.554	9546798			HMDB05334	1.174	0.4208	1.0161	1.2911	1.5683	1.275	1.7028	2.1949	0.9839	0.9035	1.1288	0.9747	0.9665	0.7809	1.8499	1.2572	1.1745	1.1149	0.5605	1.1195	1.5166	1.1499	0.7926	1.1657	1.5524	0.5046	0.6598	0.7413	0.3715	0.5961	0.8351	0.7277	0.5763	0.7095	0.3172	1.2423	0.8527
2086	1-stearoyl-2-linoleoyl-GPC (18:0/18:2)*	Lipid	Phosphatidylcholine (PC)	52452	LC/MS Pos Late	100008980	2380	786.601				HMDB08039	1.0548	1.1047	1.0456	1.283	0.914	0.8662	0.9669	1.0328	1.2315	1.1879	0.6316	0.6686	0.6837	0.7826	0.821	0.8581	1.008	1.0429	0.9234	0.7816	1.2008	1.0329	0.8549	1.1401	1.2168	1.0077	1.1168	1.1293	1.1886	0.9923	0.8898	1.0428	1.0567	1.1569	0.921	0.9805	0.5925
2183	1-stearoyl-2-linoleoyl-GPE (18:0/18:2)*	Lipid	Phosphatidylethanolamine (PE)	52446	LC/MS Pos Late	100008976	2522	744.554	9546749			HMDB08994	1.2897	1.7833	1.022	1.5663	1.0684	0.9791	0.7816	0.5778	1.3848	1.1808	0.2761	0.3997	0.5799	0.4976	0.4984	0.3639	0.7442	0.7966	0.9287	0.397	1.6928	1.3965	1.1458	1.1135	1.2678	1.1207	1.3355	0.9983	1.6201	1.0511	0.7967	0.9158	1.0587	1.3632	1.0553	1.0017	0.3941
2290	1-stearoyl-2-linoleoyl-GPI (18:0/18:2)	Lipid	Phosphatidylinositol (PI)	52468	LC/MS Pos Late	100008994	3185	880.591				HMDB09809	1.3105	1.4534	1.0923	1.5506	1.0069	0.9583	0.8303	0.7395	1.2994	1.0671	0.4523	0.3566	0.4506	0.5512	0.5029	0.5958	0.731	0.7248	0.8826	0.4805	1.4031	1.375	1.0192	1.3841	1.4302	1.2904	1.3359	1.2847	1.4565	1.0136	0.9931	0.8356	1.0805	1.2734	0.9075	1.0731	0.4244
2255	1-stearoyl-2-linoleoyl-GPS (18:0/18:2)	Lipid	Phosphatidylserine (PS)	53009	LC/MS Pos Late	100000642	2689	788.544	9547091	322647-11-0			1.3404	1.3624	1.7763	1.1217	0.8238	0.7585	0.9287	0.815	1.2064	1.1167	0.5806	0.763	0.625	10.6735	0.6485	0.5282	1.3636	0.8697	0.9754	0.4977	1.3991	0.9973	0.9356	1.1826	1.4223	1.3785	1.0027	2.1891	1.6368	1.0393	0.9387	0.6693	1.1332	1.1081	0.8893	1.4932	0.4125
2083	1-stearoyl-2-oleoyl-GPC (18:0/18:1)	Lipid	Phosphatidylcholine (PC)	52438	LC/MS Pos Late	100008904	2644	788.616		56421-10-4		HMDB08038	1.098	1.9323	0.4699	1.5606	0.8502	0.8872	0.9603	1.0149	1.9985	2.3292	0.5566	0.7662	0.5486	0.6408	0.5849	1.3475	1.6469	2.3679	1.6733	1.2588	1.384	0.8962	0.571	0.8329	0.6638	1.5454	1.7862	2.4072	2.2294	1.6882	0.9851	0.841	1.2333	1.3136	1.4198	0.8845	0.3178
2180	1-stearoyl-2-oleoyl-GPE (18:0/18:1)	Lipid	Phosphatidylethanolamine (PE)	42448	LC/MS Pos Late	100001856	2858	746.569				HMDB08993	1.1719	3.106	0.738	1.8551	0.9822	0.923	0.8359	0.5392	2.387	1.9608	0.2911	0.5604	0.5283	0.422	0.3348	0.4514	1.0498	1.3702	1.6235	0.5365	1.8288	1.2098	1.0178	0.8189	0.7459	1.7318	1.7809	2.0973	2.431	1.6879	0.7533	0.9026	1.398	1.7061	1.3687	0.9062	0.2609
2289	1-stearoyl-2-oleoyl-GPI (18:0/18:1)*	Lipid	Phosphatidylinositol (PI)	52726	LC/MS Pos Late	100009181	3711	882.607					1.4031	1.5594	0.581	0.9759	0.6631	1.0881	0.8083	0.8115	2.1746	1.7331	0.2277	0.282	0.4247	0.458	0.2962	0.6043	0.6025	0.8084	1.2379	0.2901	1.1371	1.3882	0.9105	1.1828	1.1634	1.7768	1.4335	1.6462	1.7848	1.0494	0.8629	0.8748	1.1753	1.7013	1.1049	1.0241	0.2565
2254	1-stearoyl-2-oleoyl-GPS (18:0/18:1)	Lipid	Phosphatidylserine (PS)	19265	LC/MS Pos Late	100000639	3000	790.559	9547087			HMDB10163	0.9819	0.9717	1.2571	0.8075	1.2321	0.8837	0.8254	1.0181	0.8168	0.8943	0.4454	0.3579	0.6033	2.1959	0.479	0.485	1.0466	0.5615	0.5514	0.423	0.7347	1.1483	1.4871	1.4321	1.314	2.3976	1.4169	1.7604	2.0137	1.7205	1.0298	0.8502	1.0498	1.0476	1.0671	1.7304	0.3984
2351	1-stearoyl-GPC (18:0)	Lipid	Lysophospholipid	33961	LC/MS Pos Late	100001271	1606	524.371	497299	19420-57-6		HMDB10384	1.1334	1.114	0.9502	1.307	1.4282	0.5583	0.8674	0.8833	1.1781	1.4166	0.5664	0.6239	0.4907	0.6111	0.7325	0.6512	0.7083	0.7301	0.7705	0.6431	1.9004	1.2418	0.7295	1.4478	1.6784	1.0274	1.1253	1.692	1.2234	0.9191	1.4039	1.2926	1.2484	1.341	1.0804	1.2842	0.5357
2403	1-stearoyl-GPE (18:0)	Lipid	Lysophospholipid	42398	LC/MS Pos Late	100001461	1626	482.324	9547068	69747-55-3		HMDB11130	1.1235	1.2692	0.8586	1.1623	1.4456	0.7248	0.805	0.7006	1.0391	1.2007	0.4446	0.6218	0.5323	0.4554	0.6649	0.4674	0.745	0.6369	0.7427	0.5667	2.119	1.4081	0.9889	1.18	1.5445	0.9883	1.0711	1.5231	1.3303	0.9669	1.2522	1.0612	1.1175	1.3029	1.0111	1.3141	0.597
2442	1-stearoyl-GPG (18:0)	Lipid	Lysophospholipid	34437	LC/MS Neg	100001462	5816	511.304					1.0139	1.2952	1.2989	1.1272	1.7105	0.9065	0.4169	0.8379	0.5405	0.8374	0.4169	0.4908	0.4169	0.4169	0.8083	0.5193	0.955	0.4169	0.4169	0.8802	2.503	1.734	0.5935	1.3148	1.069	0.6586	0.8366	1.2507	0.9478	0.4169	1.7954	2.5472	2.0548	1.3758	0.9861	1.5743	0.4681
2450	1-stearoyl-GPI (18:0)	Lipid	Lysophospholipid	19324	LC/MS Neg	100000656	5794	599.32		796963-93-4		HMDB61696	1.1214	1.9627	5.0663	2.3544	2.7458	1.1948	0.6592	0.7757	0.7699	1.0893	0.3717	0.3992	0.56	0.4809	0.3826	0.5208	0.361	0.434	2.3276	0.7742	0.7577	1.0179	1.783	1.8263	1.4946	1.1909	0.7265	0.9989	1.1741	0.8747	0.8369	0.8106	1.0011	1.0172	0.7923	1.1143	0.547
2434	1-stearoyl-GPS (18:0)*	Lipid	Lysophospholipid	45966	LC/MS Neg	100004327	5800	524.299	9547101				0.6748	0.7081	3.7296	0.6579	1.9863	0.5203	0.2752	0.2752	0.2752	0.433	0.2752	0.2752	0.2752	0.2752	0.2752	0.2752	0.2752	0.2752	0.2752	0.2752	0.2752	0.2752	2.7269	1.9508	2.4762	1.6146	0.7798	0.4449	1.4147	0.996	0.7923	0.2752	0.6203	0.7421	1.2263	2.3219	1
4208	2-(4-hydroxyphenyl)propionate	Xenobiotics	Benzoate Metabolism	35632	LC/MS Neg	100001622	1797.3	165.056	102526	938-96-5	C03080	HMDB41683	0.7071	0.7657	2.2606	1.629	0.3081	0.9124	2.8245	0.3081	2.6473	1.2331	0.4719	0.3081	1.3726	1.7519	0.3081	0.3081	0.3081	0.765	1.187	0.9001	0.3081	0.5158	1.2827	1	2.006	2.8667	0.9346	0.3081	1.455	0.6663	0.3081	2.1375	0.3081	0.6291	2.0271	0.8629	0.3081
375	2,3-dihydroxy-2-methylbutyrate	Amino Acid	Leucine, Isoleucine and Valine Metabolism	57547	LC/MS Polar	100010869	1318	133.051	301941	14868-24-7		HMDB29576	0.9228	1.7083	1.258	1.1927	1.328	0.9793	0.4307	0.2848	0.9567	0.4913	0.4173	0.8881	1.4468	1.1942	0.8176	0.8628	1.0207	0.9768	0.8714	1.0825	0.8238	0.7103	1.3926	0.9031	1.317	1.2388	0.8299	0.9497	1.4201	0.8864	1.1621	0.7654	1.0541	1.368	1.9715	1.4858	1.1202
394	2,3-dihydroxy-5-methylthio-4-pentenoate (DMTPA)*	Amino Acid	Methionine, Cysteine, SAM and Taurine Metabolism	62805	LC/MS Neg	100020893	1156	177.023					0.7884	1.1448	1.4745	1.0998	1.0678	1.0607	1.254	0.7622	1.4118	0.9021	1.0509	0.9334	1.2111	0.8504	1.1916	1.0417	1.0617	0.8635	1.3773	0.8978	1.0429	0.5565	1.0672	1.318	1.3893	0.9389	0.8948	0.6822	0.8298	0.7313	1.1242	1.0063	0.7983	0.8155	0.9937	0.8191	1.0269
4356	2,3-dihydroxyisovalerate	Xenobiotics	Food Component/Plant	38276	LC/MS Polar	100002417	1050	133.051	677	1756-18-9	C04039	HMDB12141	0.8763	0.8248	0.7908	1.0845	0.9472	0.3921	0.4369	0.2661	0.8261	0.4275	0.3451	0.3657	0.7811	0.3864	0.5327	1.0528	1.0539	1.8177	1.7609	1.7239	0.8349	0.8078	1.1131	1.2008	1.6189	1.1911	2.2596	1.3874	1.4585	1.8064	0.6571	0.7738	0.5213	1.2579	0.564	1.5791	2.1835
1820	2,4-dihydroxybutyrate	Lipid	Fatty Acid, Dihydroxy	62951	LC/MS Polar	100002285	1793	119.035	192742	1518-62-3		HMDB00360	0.8748	0.779	0.7345	1.0851	0.7558	0.8509	0.8732	0.9231	1.1964	0.9578	0.7318	0.867	0.9044	0.7466	1.0551	0.804	1.0162	1.2128	1.5554	1.1476	0.9421	0.9562	1.447	0.9401	1.1641	1.1113	1.5048	0.9839	1.1428	1.2535	0.5362	1.0161	0.8919	1.0294	0.4732	1.5578	1.2926
5287	2,6-dihydroxybenzoic acid	Xenobiotics	Drug - Topical Agents	63042	LC/MS Polar	100020837	729	153.019	9338	303-07-1		HMDB13676	1.0876	1.6089	2.2628	2.1578	1.7299	1.2792	1.1634	0.36	2.056	0.956	0.5089	0.378	1.3151	0.5565	0.6119	0.4444	0.3687	0.8493	0.9882	0.6256	0.9222	1.006	1.5075	1.2091	2.2982	0.854	0.8654	0.8198	0.9947	0.6561	1.3653	1.3784	1.3865	1.1263	1.0053	0.7968	0.8829
4361	2,8-quinolinediol sulfate	Xenobiotics	Food Component/Plant	48691	LC/MS Neg	100004321	2612	239.997					0.1696	0.9404	3.7417	0.1696	0.8671	1.1854	0.4897	2.2327	0.7959	0.481	1	0.5424	1.2593	0.2457	0.4187	1.5863	0.9157	1.1714	2.0981	0.1696	0.1696	0.1696	0.2947	0.1696	0.1696	1.1022	0.6045	0.1696	1.1251	1.1894	0.1696	0.1696	0.1696	1.2355	0.1696	4.4917	0.9546
115	2-aminoadipate	Amino Acid	Lysine Metabolism	6146	LC/MS Polar	381	3500	160.061	469	542-32-5;1118-90-7	C00956	HMDB00510	1.1769	0.5561	0.766	1.1813	0.7775	1.0422	0.6508	0.887	0.9229	0.6821	2.039	2.1205	2.5718	1.4303	1.9564	1.0166	1.0668	1.1531	0.5912	1.4078	1.3065	1.6174	10.7039	1.0461	0.8236	0.6695	0.784	0.7668	0.6148	0.8992	25.5931	0.8029	0.7612	1.7407	1.0937	0.8958	1.0828
513	2-aminobutyrate	Amino Acid	Glutathione Metabolism	42374	LC/MS Pos Early	1128	2059	104.071	439691	1492-24-6	C02261	HMDB00650	0.9648	0.8702	1.208	1.0352	0.8453	1.0434	0.8686	1.2282	0.6988	0.7589	2.3419	2.0942	1.1759	1.7044	1.8753	1.2885	1.4722	1.3654	0.8047	1.2237	0.8466	0.7412	0.7603	0.8604	0.85	0.9044	0.773	0.9548	0.8437	0.6753	2.5927	0.8061	1.325	2.5546	1.9413	0.8915	1.6793
1593	2-aminoheptanoate	Lipid	Fatty Acid, Amino	43761	LC/MS Pos Early	100004542	3160	146.118	227939	1115-90-8			0.9954	1.5592	1.1064	1.2105	0.77	1.2505	1.1268	0.8487	1.1769	0.8829	1.0046	0.5289	1.4654	1.0727	1.4099	0.9496	1.3821	0.7655	1.1814	1.045	2.2061	0.7442	1.7891	2.2728	2.3178	1.0981	0.9182	0.7928	0.8327	0.6785	0.8223	1.599	0.6494	1.2981	0.8389	0.5495	0.7784
5387	2-aminophenol sulfate	Xenobiotics	Chemical	43266	LC/MS Neg	100004322	1677	188.002	181670			HMDB61116	0.4162	1.5335	2.1935	0.4162	1.2716	0.6732	0.4162	0.4162	0.7	0.4162	0.718	0.4162	1.7713	1.1055	0.9575	0.4162	0.4162	1.3569	1.5605	0.4162	0.4162	0.4162	1	0.4162	1.0418	0.621	0.5102	0.4162	0.9278	0.7582	0.4162	1.4305	0.5765	0.8497	0.4162	1.7962	1.2263
2599	2-arachidonoylglycerol (20:4)	Lipid	Monoacylglycerol	19266	LC/MS Neg	100000584	6170	303.233	5282280	53847-30-6	C13856	HMDB04666	0.7038	0.384	0.3756	0.3756	0.3917	0.3756	0.3756	1	1.0023	0.3756	0.3756	0.9194	0.4194	0.3756	0.3857	1.1035	0.9794	0.5176	0.3853	0.3756	2.4209	1.4666	0.3756	0.5789	0.9092	1.3413	1.3525	0.4998	1.0553	2.932	0.3756	2.4709	2.3482	2.4291	1.6962	1.2281	0.3756
3843	2'-deoxyadenosine	Nucleotide	Purine Metabolism, Adenine containing	1553	LC/MS Pos Early	211	2252	252.109	13730	16373-93-6	C00559	HMDB00101	0.7919	3.505	2.5588	0.535	1.5919	1.1724	0.2986	0.9594	0.1732	1.2574	1	0.3112	1.0742	0.0749	0.0945	0.1373	0.0819	0.0749	0.2568	0.5264	0.3621	0.8959	3.0211	1.2283	3.8552	4.393	5.4313	0.3089	3.7107	5.3436	0.9489	0.9694	0.215	0.7626	1.585	3.2966	1.0129
3933	2'-deoxycytidine	Nucleotide	Pyrimidine Metabolism, Cytidine containing	15949	LC/MS Pos Early	100000125	2193	228.098	13711	951-77-9	C00881	HMDB00014	0.9743	0.8472	1.0257	0.9449	2.1705	0.5648	0.5576	0.8584	0.5268	0.4442	0.5426	0.4004	0.4902	0.3785	0.4915	0.4686	0.58	0.4499	0.4287	0.5204	0.6176	1.375	3.0896	2.4521	2.0269	2.945	2.6438	0.5858	2.5558	3.218	1.286	1.1831	1.4482	1.817	2.3322	2.6398	1.9055
3874	2'-deoxyguanosine	Nucleotide	Purine Metabolism, Guanine containing	1411	LC/MS Neg	348	1700	266.089	187790	961-07-9	C00330	HMDB00085	0.7314	1	1.5986	1.3195	2.4479	0.4679	0.0997	0.8128	0.1055	0.354	0.2835	0.065	0.4474	0.2216	0.1255	0.1672	0.1572	0.0877	0.065	0.1134	0.3017	2.1742	3.8308	3.2873	4.8658	4.5714	4.0611	0.3383	3.5815	6.2711	0.9639	0.9921	1.0646	2.2635	2.9891	5.6154	2.4937
3804	2'-deoxyinosine	Nucleotide	Purine Metabolism, (Hypo)Xanthine/Inosine containing	15076	LC/MS Neg	100000135	1688	251.079	65058	890-38-0	C05512	HMDB00071	0.8069	1.0931	1.8188	1.4144	2.3167	0.6385	0.1592	0.8603	0.1603	0.4611	0.3481	0.0278	0.5053	0.1855	0.1619	0.2087	0.2127	0.102	0.0912	0.1688	0.2378	1.9898	3.6292	2.9478	4.6578	4.3509	3.7594	0.2877	3.3145	5.8891	0.9766	0.8798	1.0234	2.0087	2.6576	5.3873	2.3283
3908	2'-deoxyuridine	Nucleotide	Pyrimidine Metabolism, Uracil containing	1412	LC/MS Neg	536	1586	111.02	13712	951-78-0	C00526	HMDB00012	0.7701	0.8597	0.7414	0.6446	0.7001	0.8555	0.8915	1.0053	0.7952	0.728	0.8168	0.9947	0.8713	0.8317	0.936	1.0876	1.5673	0.9042	0.7588	1.2287	1.1178	0.8358	1.2165	1.0463	1.2739	1.1934	1.1219	1.0358	1.3	1.1949	0.9897	0.9452	1.0372	1.1354	1.1089	1.9088	1.087
346	2-hydroxy-3-methylvalerate	Amino Acid	Leucine, Isoleucine and Valine Metabolism	36746	LC/MS Neg	100001541	1800	131.071	164623	488-15-3		HMDB00317	1.0554	0.8028	1.2531	0.5884	1.7825	0.6702	0.5145	0.2845	0.4479	0.4151	1.1291	1.6514	1.3703	1.005	0.6685	0.8434	0.6022	2.2843	0.572	0.6852	0.4277	0.9116	2.064	0.6242	0.6291	0.8832	0.57	0.995	1.2157	0.7529	9.6847	1.5493	7.5901	5.7529	5.5446	5.1453	6.3028
395	2-hydroxy-4-(methylthio)butanoic acid	Amino Acid	Methionine, Cysteine, SAM and Taurine Metabolism	63739	LC/MS Polar	100021372	1065	149.028		583-91-5			2.3181	0.9617	1.4068	0.8894	1.6543	1.0383	0.6187	0.1373	0.9607	0.7587	0.6168	0.8263	1.2898	0.4645	0.7791	0.412	1.3418	0.598	0.8212	0.3622	1.5791	0.8591	0.94	0.6411	0.4662	2.2102	0.6971	0.5363	2.0505	1.6358	2.6875	1.1451	1.6577	3.0254	1.6762	1.8289	6.102
1510	2-hydroxyadipate	Lipid	Fatty Acid, Dicarboxylate	31934	LC/MS Polar	100001153	3000	161.046	193530	18294-85-4	C02360	HMDB00321	1.0043	2.2907	1.3202	0.6739	0.5777	0.8429	0.9957	0.4175	0.7521	0.5778	0.8057	0.5978	0.85	1.6303	0.4152	0.6248	1.1408	0.6897	1.0332	0.6074	0.8466	1.0308	18.174	1.0801	4.362	1.0829	0.5946	0.4848	0.8288	1.3849	39.2223	1.0456	1.0857	1.8959	1.4767	1.1478	0.9612
1758	2-hydroxyarachidate*	Lipid	Fatty Acid, Monohydroxy	61700	LC/MS Neg	100019892	5990	327.291	5225199				1.0735	0.9075	1.904	1.5777	0.9634	0.6757	0.7625	2.189	0.6107	0.935	0.8929	0.9814	1.1022	1.4308	1.4753	2.4359	3.7887	1.9697	1.5618	2.4425	1.2511	1.1818	1.1168	1.136	0.6482	1.1109	1.0162	0.9723	1.2505	0.9838	0.8604	0.8475	0.8898	0.9015	1.1949	0.7453	0.4614
1759	2-hydroxybehenate	Lipid	Fatty Acid, Monohydroxy	57663	LC/MS Neg	100015637	6384	355.322	193484				0.9302	1.0557	1.7999	2.0413	1.2422	0.334	0.9068	2.2623	0.7552	1.0187	0.7603	0.8405	1.1103	1.6027	1.3194	2.3249	4.837	1.8636	1.53	2.3903	0.8198	1.067	1.1343	1.1229	0.51	1.0871	0.9813	1.6274	1.2448	0.8585	0.9441	0.8093	0.8214	0.9761	0.9193	0.7219	0.3378
515	2-hydroxybutyrate/2-hydroxyisobutyrate	Amino Acid	Glutathione Metabolism	52281	LC/MS Polar	100008928	1258	103.04	440864;11671				1.0403	0.9015	1.3917	0.8614	0.9759	0.7618	0.767	1.0772	0.8981	0.6717	0.9528	1.0462	1.0651	1.1083	1.6756	0.9422	1.0755	1.0206	0.9235	1.1237	0.8781	0.8799	1.2871	0.9366	1.054	1.0478	1.2819	1.2398	1.2236	0.8514	1.4138	0.7947	0.9649	1.2188	0.9649	0.851	1.115
1752	2-hydroxydecanoate	Lipid	Fatty Acid, Monohydroxy	42489	LC/MS Neg	100004089	4840	187.134	21488	5393-81-7			0.5497	0.8957	1.506	0.8074	0.8236	0.5035	0.4378	1.6004	0.4639	0.526	0.9494	0.9174	1.0144	1.1092	1.2226	2.3594	4.4002	2.3015	0.9632	2.0552	0.9107	0.6496	1.025	0.7033	1.1115	0.7226	1.2894	0.8301	0.7787	0.8591	5.3156	1.077	1.7806	1.3658	5.0854	1.1769	1.5608
1506	2-hydroxyglutarate	Lipid	Fatty Acid, Dicarboxylate	37253	LC/MS Pos Early	100002070	958	131.034	43	40951-21-1	C02630	HMDB0059655	1.0398	0.9088	0.8623	1.1279	0.8933	0.9334	0.9352	0.9835	1.0249	0.9804	0.8449	0.7551	0.9268	0.575	0.9957	0.9947	1.0403	0.9932	1.3845	0.8667	0.9705	0.9825	1.4412	1.2385	1.2322	1.1703	1.0043	0.9656	1.1906	1.0074	1.0214	1.4148	1.1183	1.1433	0.6825	1.4693	0.9884
1750	2-hydroxyheptanoate*	Lipid	Fatty Acid, Monohydroxy	61827	LC/MS Polar	100019960	925	145.087	2750949				1.172	1.2246	1.9488	0.9961	0.9769	1.0802	0.8286	0.6004	1.0994	0.7766	0.602	0.749	0.7878	0.6972	0.7776	0.8516	0.9018	1.0725	0.7679	0.5798	2.1143	0.7472	1.884	1.5021	1.8767	0.9473	0.9106	0.7711	1.0039	0.9655	3.4877	2.0071	3.1003	1.9554	4.233	1.4208	1.5344
1753	2-hydroxylaurate	Lipid	Fatty Acid, Monohydroxy	52916	LC/MS Neg	100008934	5211	215.165	97783	2984-55-6			0.5465	0.7655	0.8161	0.795	0.9303	0.6631	0.9242	1.2867	0.7162	0.9278	1.0156	1.0049	0.7357	1.3487	1.415	0.8409	1.3216	0.8429	1.2092	0.9841	1.2602	0.9631	1.0036	1.4972	1.1962	1.0111	1.0679	0.9714	0.5465	1.2338	1.1537	1.0219	1.2683	1.2707	1.0822	0.9964	0.5465
1761	2-hydroxynervonate*	Lipid	Fatty Acid, Monohydroxy	61698	LC/MS Neg	100015638	6345	381.337	5312783				0.8787	0.9935	1.1369	1.6122	1.0857	0.4835	1.1399	2.6371	1.036	1.8856	0.87	0.7861	0.9147	1.3731	1.2201	2.4803	6.4384	2.3698	2.2471	3.594	0.8276	1.1467	0.8804	0.9818	0.4955	1.1413	1.0065	3.2695	1.4881	1.0814	0.6111	0.6427	0.5368	0.5172	0.6018	0.8167	0.4695
1751	2-hydroxyoctanoate	Lipid	Fatty Acid, Monohydroxy	22036	LC/MS Neg	100000743	3736.8	159.103	94180	617-73-2		HMDB02264	0.7564	0.9509	1.521	1.1027	0.8821	0.5604	0.7415	1.7958	0.6021	0.745	0.6687	0.5191	1.493	0.7094	1.1357	3.1213	6.195	1.6895	1.5016	2.5926	1.3756	0.9038	1.024	1.4713	1.2287	0.6946	0.8219	1.1298	1	0.871	1.3233	0.9186	1.0327	0.6263	0.5191	0.5191	0.5191
1755	2-hydroxypalmitate	Lipid	Fatty Acid, Monohydroxy	35675	LC/MS Neg	100001579	5511.2	271.228	92836	764-67-0		HMDB31057	1.0378	0.9217	1.0504	0.9334	1.0026	0.7018	0.6643	1.3174	0.706	0.5516	0.6433	0.7202	1.1652	1.348	0.9238	1.49	2.0262	1.2474	1.2573	1.2443	1.2764	1.3305	0.9312	0.7869	0.6343	1.2129	1.0454	0.798	1.3229	1.4546	0.9135	0.9974	1.04	1.247	1.1252	0.799	0.4905
148	2-hydroxyphenylacetate	Amino Acid	Phenylalanine Metabolism	1432	LC/MS Polar	235	858.6	151.04	11970	614-75-5	C05852	HMDB00669	0.7451	1.2685	2.2157	0.7696	1.1253	1.6032	1.152	0.3799	1.6367	0.3832	1.0603	0.8779	1.1926	0.8271	0.5303	0.5582	0.5556	0.5918	1.0848	0.4753	0.8231	0.8261	1.7687	0.9274	2.0991	1.2173	0.5519	0.5729	1.2974	0.6831	2.2103	1.2409	1.4056	0.6382	0.9397	1.9107	1.8684
1552	2-hydroxysebacate	Lipid	Fatty Acid, Dicarboxylate	63357	LC/MS Polar	100020378	2358	217.108	128458	103963-71-9		HMDB00424	0.8586	0.9923	1.3638	0.7116	0.6036	0.9607	0.7876	0.7218	0.5761	0.4267	0.5024	0.2719	0.8208	1.2434	0.7075	1.6345	3.6887	0.8671	1.1847	1.0818	1.6832	1.145	1.1362	2.3049	3.5056	1.1377	1.0109	0.2719	0.7485	1	2.2188	1.1641	1.5362	1.353	2.848	1.6161	0.8571
1757	2-hydroxystearate	Lipid	Fatty Acid, Monohydroxy	17945	LC/MS Neg	1239	5695	299.259	69417	629-22-1	C03045		0.9889	1.1503	1.7175	1.2263	1.4346	0.8824	0.947	1.7502	0.762	0.8906	0.8086	0.9514	0.8932	1.0654	1.0317	1.7815	2.321	1.4847	1.1613	1.4283	1.2467	1.0293	1.0456	0.9673	1.0593	0.988	0.9107	1.026	1.0769	0.9696	1.0111	0.9113	0.7404	0.7786	1.077	0.6967	0.5867
2598	2-linoleoylglycerol (18:2)	Lipid	Monoacylglycerol	32506	LC/MS Neg	100000987	6250	279.233	5365676	3443-82-1		HMDB11538	3.3466	2.0323	0.429	1.0274	0.9617	0.4816	0.2275	0.4003	0.8113	0.5594	0.5081	0.9726	0.4201	0.6272	0.3021	0.7211	0.6075	0.4466	1.2975	0.1518	12.6567	4.9022	4.0995	2.2419	2.8926	4.7534	4.505	0.2766	3.6911	5.5242	0.3062	5.0871	6.9554	6.9938	4.6232	2.2719	0.5753
348	2-methylbutyrylcarnitine (C5)	Amino Acid	Leucine, Isoleucine and Valine Metabolism	45095	LC/MS Pos Early	100001509	3050	246.17	6426901	31023-25-3		HMDB00378	1.1384	0.9077	1.0468	1.4986	1.3642	1.2258	0.4945	0.2172	0.7667	0.2172	1	0.7474	0.9829	1.1809	1.2079	0.6468	0.4278	0.8981	0.9918	0.6448	0.7295	2.0822	1.8433	1.2658	1.2172	0.7603	0.8895	0.7677	0.852	0.9321	2.2159	1.0848	1.0231	2.0081	0.9241	1.7007	1.2837
1324	2-methylcitrate/homocitrate	Energy	TCA Cycle	52282	LC/MS Neg	100008929	575	205.035	515;439459				0.9045	0.9691	1.2024	1.4265	1.1935	0.9751	0.7923	0.5277	0.6513	0.4728	0.801	0.592	1.2501	0.9583	1.5796	0.5017	0.8372	1.0544	0.9128	1.1046	0.818	1.1198	0.9951	1.06	2.4573	0.5463	1.0739	0.5372	0.8879	1.0049	1.6279	0.8245	1.2238	1.4647	1.0641	1.2592	1.7797
2597	2-oleoylglycerol (18:1)	Lipid	Monoacylglycerol	21232	LC/MS Neg	100000943	6500	281.249	5319879	3443-84-3		HMDB11537	1.8338	2.9056	0.1144	0.6463	0.7068	0.6374	0.088	0.1597	0.8781	0.4665	0.0805	0.3538	0.0805	0.0805	0.0805	0.3313	0.2115	0.1252	1.1219	0.0805	9.3842	5.5483	1.8235	1.8784	2.0732	4.9735	5.0333	0.7217	9.4243	6.2174	0.1571	3.2268	6.3142	5.877	5.4277	1.7313	0.2203
4015	2-O-methylascorbic acid	Cofactors and Vitamins	Ascorbate and Aldarate Metabolism	63990	LC/MS Polar	100003258	1512	189.041	99779	17860-87-6			1.3307	0.9377	0.8876	1.0775	1.0729	0.805	0.9996	1.0823	1.2384	0.6987	1.1662	0.5451	1.0583	0.9528	1.3369	0.7856	0.9512	0.4878	1.0004	1.0383	1.3304	0.9906	1.1577	1.0247	1.4722	0.8095	0.7929	0.5753	0.8542	0.825	1.0521	1.0031	0.9448	0.9573	1.3765	1.4721	1.2368
3934	2'-O-methylcytidine	Nucleotide	Pyrimidine Metabolism, Cytidine containing	57554	LC/MS Pos Early	100010895	2411	258.108	150971	2140-72-9			0.4466	0.7276	0.5892	0.9932	0.7644	1.0068	1.1272	1.1741	1.1051	0.9861	0.749	0.7845	0.917	0.648	1.1567	1.3095	1.2285	1.0529	1.3537	1.3436	1.2687	1.4157	1.2333	0.8955	0.924	1.5367	1.9168	1.2768	1.4451	1.419	0.8869	0.8841	0.8866	1.1651	0.9404	0.8273	0.8918
3896	2'-O-methyluridine	Nucleotide	Pyrimidine Metabolism, Uracil containing	57655	LC/MS Neg	100010896	1831	257.078	102212	2140-76-3			0.7802	0.9235	0.8375	1.157	1.1206	0.8974	0.9885	0.9025	0.936	0.8643	0.5792	0.6531	0.9685	0.6181	1.3265	1.1708	1.2885	0.8263	1.4888	1.6015	1.4283	1.3993	1.8221	1.1512	1.4322	1.9903	1.759	1.5181	2.059	1.5096	1.3814	0.8556	0.991	1.0605	0.9715	1.009	0.8178
4365	2-oxindole-3-acetate	Xenobiotics	Food Component/Plant	40479	LC/MS Neg	100003109	2076	190.051	3080590	2971-31-5		HMDB35514	0.9321	1.359	1.7804	0.4821	0.5859	0.9752	1.2793	0.089	2.1142	0.6975	0.9823	0.5437	0.9669	1.2766	0.5492	0.3187	0.4346	0.9434	2.4671	1.8449	0.7491	0.49	1.6755	1.0421	2.8408	2.2171	0.7565	1.6404	1.0177	0.8897	0.9182	2.018	1.1446	1.1647	1.5181	1.454	1.0382
117	2-oxoadipate	Amino Acid	Lysine Metabolism	38347	LC/MS Polar	92	2635	159.03	71	3184-35-8	C00322	HMDB00225	1.8568	0.5334	0.6789	1.0405	0.7719	1.3197	0.6809	0.8964	0.8379	0.6933	1.6544	1.9223	2.4364	0.7193	1.6227	1.0892	0.9642	1.1179	0.5669	1.0302	1.3202	1.7286	22.3632	1.0155	1.058	0.8221	0.783	0.6939	0.5354	0.8883	68.4739	1.0348	0.6525	1.4722	1.2948	1.3371	0.7817
432	2-oxoarginine*	Amino Acid	Urea cycle; Arginine and Proline Metabolism	55072	LC/MS Pos Early	100002784	1760	174.087	558	3715-10-04	C03771	HMDB04225	1.2384	0.7053	0.8008	1.0592	0.4719	1.1441	1.2139	0.9725	1.146	0.7321	0.5127	0.4514	0.869	0.999	0.9867	1.6769	0.7577	1.0248	1.1819	0.3864	0.9523	1.484	0.919	0.7089	0.6558	1.001	2.6067	0.6321	1.6396	1.1057	1.6462	1.5272	0.6786	1.0036	0.596	0.6118	1.2621
2345	2-palmitoleoyl-GPC* (16:1)*	Lipid	Lysophospholipid	47118	LC/MS Neg	100001561	5720	568.326				HMDB10383	1.8254	2.3077	0.6883	1.3529	1.2906	0.818	0.8593	0.6541	1.6733	2.3588	0.2596	0.8768	0.6532	0.3012	0.4061	0.7946	1.0761	1.2805	1	1.4887	1.3204	0.854	0.2329	0.9706	0.6213	1.5635	1.1572	2.7021	1.3404	1.5814	0.5379	0.5334	1.1928	1.1941	1.1946	0.2088	0.2088
2343	2-palmitoyl-GPC* (16:0)*	Lipid	Lysophospholipid	35253	LC/MS Neg	100001562	6215	570.341	15061532			HMDB61702	1.4601	1.4084	0.9896	1.2566	1.7347	0.7718	0.7917	0.6766	0.9836	1.0113	0.5376	0.6059	0.5762	0.6552	0.6554	0.5733	0.6516	0.5475	0.8142	0.8321	1.6176	1.4562	0.9608	1.701	1.8184	1.2148	1.1038	1.6796	1.3979	1.0124	1.4064	1.133	0.9644	0.9508	1.033	1.0104	0.6774
4255	2-piperidinone	Xenobiotics	Food Component/Plant	43400	LC/MS Pos Early	100004295	1675	100.076	12665	675-20-7		HMDB11749	6.2748	2.8016	2.9675	4.0607	0.7337	2.1283	1.4557	0.9332	1.9486	1.3868	1.068	0.6023	0.7323	0.4967	1.192	1.6285	0.4536	1.0454	2.3513	0.8821	13.1641	3.0743	1.1418	0.9843	0.7837	0.9314	0.6703	0.5603	0.9197	0.7971	1.0304	0.8835	1.0157	0.9324	0.6594	0.7076	1.0688
58	2-pyrrolidinone	Amino Acid	Glutamate Metabolism	31675	LC/MS Pos Early	100001081	1262	86.06	12025	616-45-5		HMDB02039	0.7113	1.0024	1.0486	0.8563	0.647	0.9112	1.1219	0.8727	0.9819	0.6188	1.2663	0.9976	0.8226	0.7982	0.7676	1.1886	1.023	1.1706	1.1399	0.9457	1.2191	0.571	1.0178	0.872	0.6287	0.8739	1.0738	0.8996	0.8347	1.0135	1.0542	1.397	1.1267	1.4237	1.2739	0.9474	1.0983
1818	2R,3R-dihydroxybutyrate	Lipid	Fatty Acid, Dihydroxy	63109	LC/MS Polar	100002367	1543	119.035	13120901	759-06-8		HMDB00498	0.7775	0.4788	0.4219	1.1833	0.8574	0.8815	1.3937	1.3063	1.2009	0.995	1.0932	0.5495	0.8893	0.7174	1.1286	1.5307	1.2489	1.3116	1.5704	1.3594	0.9347	0.7067	0.9457	0.9946	1.005	0.9581	1.4132	1.5634	1.0799	1.5579	0.7652	0.8058	0.8383	0.7004	0.454	2.1828	1.593
1817	2S,3R-dihydroxybutyrate	Lipid	Fatty Acid, Dihydroxy	62950	LC/MS Polar	100002284	1660	119.035	10964471	5057-93-2		HMDB02453	0.6234	0.5321	1.0034	1.0755	1.0169	1.0754	1.172	1.3423	0.7499	0.5815	1.2097	1.0209	0.9081	0.906	1.5786	0.9368	1.2933	1.1736	1.3248	1.0922	0.5551	0.4738	0.9966	0.9233	0.7626	0.8447	0.9273	0.8548	1.0171	1.0198	0.7232	0.6768	1.2135	0.9509	0.5425	1.5861	2.17
2404	2-stearoyl-GPE (18:0)*	Lipid	Lysophospholipid	41220	LC/MS Neg	100003901	6350	480.31				HMDB11129	1.2107	1.0709	0.989	1.2507	1.6026	0.5943	0.9043	0.8337	1.1239	0.971	0.552	0.8825	0.4844	0.5509	0.6073	0.6025	0.7162	0.5948	0.5391	0.6006	2.4289	1.4585	0.9501	1.2274	1.2807	1.0318	1.2422	1.2404	1.1824	1.5119	0.9769	1.6582	1.3075	1.7133	1.4029	1.011	0.6876
3916	3-(3-amino-3-carboxypropyl)uridine*	Nucleotide	Pyrimidine Metabolism, Uracil containing	62924	LC/MS Neg	100001426	1369	344.11	171198	52745-94-5			0.5871	0.6328	0.5483	0.5728	0.8962	0.9744	1.3837	1.6174	1.2056	0.8578	0.8288	0.7852	0.9548	0.7908	0.9902	1.5081	1.8782	1.4502	1.4123	1.9062	0.9673	0.6665	1.0465	0.9189	1.0025	1.3514	1.5879	1.8553	1.6244	1.3907	0.96	0.8179	0.8122	0.9975	0.9933	1.2595	1.2252
4209	3-(3-hydroxyphenyl)propionate	Xenobiotics	Benzoate Metabolism	35635	LC/MS Neg	100001624	1980	165.056	91	621-54-5	C11457	HMDB00375	1	0.2738	0.9439	0.6484	0.2738	0.2738	1.4715	0.2738	1.027	0.5601	0.2738	0.2738	0.2738	0.2738	0.2738	0.2738	0.2738	0.2738	3.8009	5.0746	0.2738	0.3284	0.2738	0.2738	0.4787	1.9652	0.2738	2.6122	0.4712	0.5324	1.201	5.3698	0.2738	0.2738	0.834	0.2738	0.2738
170	3-(4-hydroxyphenyl)lactate (HPLA)	Amino Acid	Tyrosine Metabolism	32197	LC/MS Neg	240	1379	181.051	9378	6482-98-0	C03672	HMDB00755	1.2035	1.7941	1.1141	0.5348	0.9265	1.188	1.0185	0.4291	0.679	0.8385	0.4942	0.6622	0.7484	0.5483	0.6024	0.9775	1.0995	0.6434	0.8066	0.5859	1.0755	0.7937	1.9837	0.8529	1.221	1.7075	1.1138	0.624	1.3652	1.3243	1.5717	0.8551	0.9815	1.0957	1.8084	0.8456	1.6467
4210	3-(4-hydroxyphenyl)propionate	Xenobiotics	Benzoate Metabolism	39587	LC/MS Neg	100002914	1670	165.056	10394	501-97-3	C01744	HMDB02199	0.7558	0.3593	2.2671	0.3037	0.8329	1.3024	1.3741	0.2323	1.0316	0.2323	0.344	0.5138	0.4926	0.2323	0.2323	0.2323	0.2323	0.914	2.76	2.077	0.3466	0.3493	0.6751	0.2323	0.5988	1.1541	0.3348	1.0019	0.6962	0.3518	1.7848	5.1365	1.8105	1.6593	0.9984	1.7594	1.0016
1821	3,4-dihydroxybutyrate	Lipid	Fatty Acid, Dihydroxy	62952	LC/MS Polar	100001730	2204	119.035		51267-44-8			0.7196	0.7988	1.4186	1.1312	0.7183	0.9548	0.9967	1.2101	1.0033	0.7226	0.9955	0.8842	1.084	1.3683	1.1591	1.2195	1.0644	1.2715	1.3459	1.4972	0.6826	0.7407	1.0611	0.6073	1.0951	1.2214	0.9628	0.8428	0.8169	0.9078	0.9745	0.7475	0.7572	1.1692	0.744	1.7502	1.2839
5525	3,5-dichloro-2,6-dihydroxybenzoic acid	Xenobiotics	Chemical	63589	LC/MS Polar	100021324	693	220.941					1.9763	2.0711	3.0878	1.7396	1.0079	1.2567	1.8336	1.3781	1.7708	1.5637	0.4445	0.7742	1.2037	0.3895	0.5471	0.8531	0.7573	0.9907	1.442	0.7895	1.4323	0.9592	1.1614	1.0619	1.4881	1.5631	1	1.0043	1.4804	0.8141	0.8494	0.9738	0.8922	0.6873	0.6709	0.6589	0.3895
430	3-amino-2-piperidone	Amino Acid	Urea cycle; Arginine and Proline Metabolism	62853	LC/MS Pos Early	100020361	2065	115.087	5200225	1892-22-4		HMDB00323	1.3628	0.8166	3.0626	1.5113	1.8619	0.8371	0.8253	0.4024	1.2062	0.5822	0.4977	0.5205	0.9486	0.6811	0.8189	0.8156	0.6545	0.8047	0.9062	0.8145	0.8386	1.4253	1.6638	1.1578	1.7081	1.1195	0.8467	0.6424	1.107	0.8386	3.1373	1.5372	1.4175	2.9737	1.418	1.7955	1.0514
3950	3-aminoisobutyrate	Nucleotide	Pyrimidine Metabolism, Thymine containing	1566	LC/MS Pos Early	1114	2190	104.071	64956	10569-72-9;214139-20-5	C05145	HMDB03911	1.0915	1.8318	1.3773	0.7956	0.2478	1.2543	2.5967	1.162	1.1541	1.145	1.014	1.2479	2.6306	5.1027	1.2101	1.4219	2.4113	0.7807	1.8246	2.6387	0.8294	0.986	0.5496	0.3907	0.7737	1.9538	0.4141	0.5132	0.5141	1.3851	0.6429	0.4198	0.3356	1.2214	0.6027	0.4401	0.2684
354	3-hydroxy-2-ethylpropionate	Amino Acid	Leucine, Isoleucine and Valine Metabolism	32397	LC/MS Polar	100001170	1443.3	117.056	188979	4374-62-3		HMDB00396	0.8965	0.6549	2.0365	0.9904	0.9829	2.1308	0.5923	0.8965	0.7641	0.6651	0.9535	0.77	1.7033	1.1762	1.2208	1.1141	0.9047	3.5756	1.2472	0.9103	0.6538	0.9296	1.2259	0.7513	0.9766	0.7774	0.9088	1.2571	1.7372	0.7801	1.5872	1.6224	0.8634	3.2857	1.0096	2.2602	2.0278
5519	3-hydroxy-2-methylpyridine sulfate	Xenobiotics	Chemical	63227	LC/MS Neg	100020975	1849	188.002					0.5698	1.3672	3.1574	0.2304	0.8309	1.2621	1.6284	0.2304	2.0181	0.4039	0.6658	0.2304	0.5694	0.5429	0.3344	0.3402	0.2304	0.4947	1.8166	0.2304	0.9873	0.6741	1.6565	0.9317	2.2099	1.4921	1.0763	0.2725	1.6417	1.2376	0.8925	1.5348	0.8346	1.0127	0.6839	1.5516	2.1918
2891	3-hydroxy-3-methylglutarate	Lipid	Mevalonate Metabolism	531	LC/MS Polar	112	2850	161.046	1662	503-49-1	C03761	HMDB00355	0.87	0.6046	1.0573	0.5105	0.5239	1.5744	1.4504	1.294	1.3716	0.678	0.9854	0.8306	0.8784	0.5443	0.7824	0.8076	1.1037	0.9571	1.1789	0.7021	0.9711	0.6306	1.2374	0.6732	1.1173	1.2649	1.3709	0.5956	0.9598	1.5721	0.8285	0.9912	1.1669	2.4327	1.3639	1.7665	1.6964
1511	3-hydroxyadipate*	Lipid	Fatty Acid, Dicarboxylate	62069	LC/MS Polar	100004396	3131	161.046	151913			HMDB00345	0.9164	0.7081	1.583	0.7438	0.8197	1.229	1.4318	0.5553	0.8643	0.4327	0.7661	0.2951	0.8606	0.8128	0.6311	1.1919	2.3672	1.093	1.2109	0.8093	0.9852	0.7094	0.9239	1.5916	2.5213	1.0638	0.7351	0.5976	1.281	1.9571	1.1589	0.9914	0.9825	1.4015	1.9008	1.8536	2.2245
1730	3-hydroxybutyrate (BHBA)	Lipid	Ketone Bodies	542	LC/MS Polar	254	1480	103.04	441	625-72-9	C01089	HMDB00357	1.5114	1.2045	2.6792	0.8769	0.5613	0.9572	1.0141	2.3492	1.6688	0.6884	1.4561	1.0892	1.1521	1.4333	2.6326	1.6248	1.3827	1.128	0.4935	1.1785	0.5919	0.9859	0.6647	0.7028	1.2584	0.5611	0.5538	1.1147	0.3024	0.7224	0.3938	0.5844	0.7124	1.9559	0.4284	0.9803	1.0749
1767	3-hydroxydecanoate	Lipid	Fatty Acid, Monohydroxy	22053	LC/MS Neg	100000997	4634.7	187.134	26612	5561-87-5		HMDB02203	0.7491	0.9046	1.1517	0.9539	1.2609	0.8158	0.6809	1.3625	0.6809	0.6809	1.0995	0.8583	0.8698	2.4076	1.337	1.0247	1.6641	0.8989	1.0879	1.3145	0.9951	1.035	0.798	1.0605	0.8702	0.977	1.3932	0.7562	1.0894	1.1074	1.2695	0.7387	0.8779	0.9728	1.4567	0.6809	0.8902
1764	3-hydroxyhexanoate	Lipid	Fatty Acid, Monohydroxy	53230	LC/MS Neg	100006367	1725	131.071	151492	10191-24-9			1.1326	0.8992	2.4369	2.0952	1.59	0.699	2.0947	5.1435	0.9283	1.3801	1.8083	1.8347	2.0386	3.1625	3.0621	4.5035	6.8875	2.4291	1.2342	3.1491	0.8633	0.8218	1.5727	0.868	0.975	0.5108	1.025	1.5111	0.6344	0.5909	0.7072	0.8636	0.4132	0.4844	0.89	0.6723	0.3105
374	3-hydroxyisobutyrate	Amino Acid	Leucine, Isoleucine and Valine Metabolism	1549	LC/MS Polar	111	1619	103.04	87	2068-83-9	C06001	HMDB00336	1.0677	0.9934	1.2584	0.8802	0.633	1.2153	0.9672	0.7734	1.3526	0.8322	1.0873	0.9897	1.3982	0.9558	1.2522	0.9378	1.3181	1.6318	0.8152	1.1551	1.0066	1.2597	1.1672	0.7292	1.0122	0.8363	1.1896	0.9685	0.6798	1.0409	1.285	1.1112	0.844	0.9285	0.8358	0.915	1.2387
254	3-hydroxykynurenine	Amino Acid	Tryptophan Metabolism	22110	LC/MS Pos Early	100000986	2536	225.087	89	2147-61-7	C02794	HMDB00732	0.2424	0.1775	0.1857	0.4932	0.1775	2.7483	2.0984	1.1574	1.6057	1.5952	0.1775	0.1775	0.8188	0.1775	0.4551	2.73	1.2074	1	1.2921	0.6859	0.1775	0.2959	0.316	0.2726	0.1775	1.5629	0.1775	2.3264	0.4779	2.3962	1.1298	0.2009	0.1775	0.1775	0.1775	1.007	0.3987
1770	3-hydroxylaurate	Lipid	Fatty Acid, Monohydroxy	32457	LC/MS Neg	100001112	5175	215.165	94216	53941-38-1		HMDB00387	0.7611	0.8663	0.5207	1.0057	1.2849	0.6674	0.7528	2.0426	0.5823	1.0165	0.9708	0.8506	1.0076	2.0769	1.5998	1.5594	1.9519	1.2109	0.7317	1.5101	1.1032	0.9588	0.9255	0.975	0.931	0.898	1.2234	1.0347	1	1.4863	1.0037	0.8815	1.1715	0.9752	1.4618	0.9845	0.5207
5490	3-hydroxypyridine sulfate	Xenobiotics	Chemical	48448	LC/MS Neg	100006098	1595.5	173.987		1955-23-3			0.6252	0.9921	2.5701	0.4657	0.7308	1.01	1.2477	0.1426	1.5062	0.3279	0.597	0.1426	0.3473	0.5339	0.3163	0.3749	0.2286	0.5501	1.4475	0.1426	1.2213	0.6987	1.4715	1.0374	2.1274	1.8379	1.3417	0.3934	1.6527	1.2745	0.9734	1.0079	1.0102	0.964	0.7234	1.7748	2.4504
1803	3-hydroxystearate	Lipid	Fatty Acid, Monohydroxy	52938	LC/MS Neg	100008933	5674	299.259	5282907	45261-96-9			1.0817	1.8156	0.6296	0.759	1.0584	0.6074	0.6011	1.161	0.7994	0.7185	0.5084	0.5141	0.694	1.2737	0.7418	1.6914	2.7153	1.2336	0.7947	1.2148	0.9416	1.336	1.0609	0.6867	0.542	0.9226	1.296	0.7366	2.348	1.3798	0.8574	1.3704	2.6436	2.04	1.4761	0.4131	0.498
4769	3-indoleglyoxylic acid	Xenobiotics	Food Component/Plant	63583	LC/MS Neg	100020372	2140	188.035	73863	1477-49-2			1.2808	1.4283	1.371	0.9509	1.0153	1.2419	1.6685	0.3942	1.9532	0.3942	0.7797	0.3942	1.0574	0.7429	0.3942	0.6487	0.3942	0.6039	1.0911	0.3942	0.9953	1.0421	0.6937	1.1547	1.9316	1.3549	0.7365	0.4402	0.7707	1	1.1253	0.76	0.9512	0.7658	1.0013	1.0416	0.7663
286	3-indoxyl sulfate	Amino Acid	Tryptophan Metabolism	27672	LC/MS Neg	100000467	2222.2	212.002	10258	2642-37-7		HMDB00682	0.6975	0.783	3.7932	1.4808	0.8108	1.3859	1.6655	0.1708	1.965	0.6209	0.4172	0.489	1.221	0.9251	0.6814	0.2146	0.2341	0.8327	1.7093	0.486	0.3988	0.5772	1.8383	0.6705	1.8667	1.6039	0.5448	0.8589	1.4509	0.5162	1.8523	2.9697	1.0749	1.2999	1.4217	1.5091	1.351
4180	3-methoxycatechol sulfate (1)	Xenobiotics	Benzoate Metabolism	48763	LC/MS Neg	100006375	2163	218.997					7.3129	0.8107	3.6986	1.6073	0.2433	0.2433	5.1282	0.2433	2.0675	2.3666	0.4632	0.2433	0.6977	0.2433	1.0918	0.2433	0.8288	0.5514	0.7211	0.6392	0.2433	4.3483	1.1555	0.556	7.5644	0.4433	1.622	0.2433	1.2627	1.0238	0.7663	0.2433	0.873	0.3842	0.2433	0.5407	1.1132
191	3-methoxytyrosine	Amino Acid	Tyrosine Metabolism	12017	LC/MS Pos Early	1342	2555	212.092	1670	300-48-1		HMDB01434	2.7024	1.0673	0.9671	0.6616	1.0435	1.2615	1.6089	1.2345	1.434	1.4213	0.8144	0.8842	2.629	4.8536	0.5908	1.2892	1.3563	0.8902	1.1855	0.6986	1.1027	1.0329	0.5909	0.5994	0.7795	1.4905	1.8711	0.7802	1.7151	1.3965	0.4675	0.6709	0.6717	0.8856	1.346	0.6434	0.7933
369	3-methyl-2-oxobutyrate	Amino Acid	Leucine, Isoleucine and Valine Metabolism	44526	LC/MS Neg	100000936	1465	115.04	49	3715-29-5	C00141	HMDB00019	1.3732	0.9321	1.0411	0.9688	0.8301	0.922	1.0031	0.982	1.155	0.8577	0.9104	1.0444	1.125	1.1046	1.6187	1.187	1.1344	1.4533	1.7609	1.2509	0.9739	1.4089	0.7853	0.7288	0.6048	0.6314	0.9969	0.9495	0.7378	0.8838	1.7481	0.8789	1.1733	1.4701	1.2233	0.7673	0.7359
345	3-methyl-2-oxovalerate	Amino Acid	Leucine, Isoleucine and Valine Metabolism	15676	LC/MS Neg	100000036	2064.2	129.056	47	1460-34-0;51829-07-3	C00671	HMDB03736	1.4443	0.8183	0.9723	0.8012	1.0244	0.9558	1.0499	0.6546	1.1675	0.7946	1.0307	1.2052	1.1846	1.1245	1.5103	1.0164	0.9914	1.3948	1.2049	1.0086	0.899	1.4352	0.9101	0.8403	0.6743	0.6192	0.8129	0.8898	0.6995	0.8459	1.7109	0.8714	1.2109	1.5431	1.049	0.7331	0.7276
321	3-methylglutaconate	Amino Acid	Leucine, Isoleucine and Valine Metabolism	38667	LC/MS Polar	100002458	2700	143.035	1551553	5746-90-7		HMDB00522	2.4696	0.5555	1.0468	1.0944	0.1232	0.5652	0.7567	0.6029	0.8577	0.5906	2.0259	2.1475	2.68	2.7415	3.9939	1.0865	0.5894	0.9204	1.5862	1.6444	1.0906	2.9387	1.8294	0.3902	1.7641	0.9223	1.999	1.1786	1.7751	0.6404	0.6368	0.7432	0.6295	0.9532	0.5329	1.7276	0.6934
1505	3-methylglutarate/2-methylglutarate	Lipid	Fatty Acid, Dicarboxylate	54676	LC/MS Polar	100010834	2832	145.051				HMDB00752	1.233	1.0778	1.3764	0.4804	0.4334	0.5292	0.7221	0.495	0.4677	0.426	0.5992	0.426	1.1413	1.1749	0.6167	0.934	0.426	0.7571	1.316	0.426	1.0203	1	0.6904	1.1996	1.231	1.1084	0.744	0.879	0.5933	1.103	0.4959	0.5628	1.0489	0.6284	1.108	1.3208	1.3176
69	3-methylhistidine	Amino Acid	Histidine Metabolism	15677	LC/MS Neg	100000042	906.3	168.078	64969	368-16-1	C01152	HMDB00479	1.371	1.8514	1.0291	0.8102	0.9827	0.9379	0.7363	1.2601	0.8791	0.7547	1.3714	1.7987	1.2364	2.1002	1.24	0.5387	0.3048	0.8187	0.5993	0.496	1.2172	1.5786	1.2283	1.9179	1.1207	0.5675	0.5706	1.0206	0.2711	0.4152	1.0173	1.6672	1.5978	2.1531	1.2276	0.3945	0.5554
4211	3-phenylpropionate (hydrocinnamate)	Xenobiotics	Benzoate Metabolism	15749	LC/MS Neg	100000010	2860	149.061	107	501-52-0	C05629	HMDB00764	1.0671	2.4847	8.0156	0.7741	2.292	1.3555	1.0468	0.8064	0.9532	0.6642	1.099	0.5641	1.7432	1.5536	0.7706	0.4488	0.2499	1.0967	1.3366	0.0808	0.0808	0.4601	4.7947	0.9183	2.4332	0.8853	0.4975	0.1953	1.5494	0.5926	0.1473	0.1934	1.4412	2.1108	1.9819	2.8172	0.6403
422	3-sulfo-L-alanine	Amino Acid	Methionine, Cysteine, SAM and Taurine Metabolism	47089	LC/MS Polar	382	2890	167.997	72886	498-40-8	C00506	HMDB02757	1.814	0.5331	0.4374	0.2305	0.5761	2.3124	3.0878	1.7968	2.2793	1.9131	0.2305	0.2305	0.2305	0.2305	0.2305	0.2305	2.0925	0.5512	1.5212	0.5814	0.8553	0.7684	0.4806	1.8826	1.3277	1.2803	0.6718	2.4266	0.8959	1.9255	0.4427	0.6761	0.5094	1.1276	1.3579	0.6513	1.1041
3911	3-ureidopropionate	Nucleotide	Pyrimidine Metabolism, Uracil containing	3155	LC/MS Pos Early	1053	875	133.061	111	462-88-4	C02642	HMDB00026	0.7213	0.5639	0.567	0.7336	0.5477	0.8775	1.097	1.9742	0.6284	0.9747	2.3846	1.352	0.8243	1.3116	1.4843	1.3122	1.6436	1.2142	1.6916	1.7025	0.7113	0.7225	1.0396	2.4617	0.8103	0.9662	0.8602	1.8889	1.1697	1.3573	1.0874	0.7008	0.6841	1.0028	0.9972	0.7297	1.0035
496	4-acetamidobutanoate	Amino Acid	Polyamine Metabolism	1558	LC/MS Pos Early	1113	1350	146.081	18189	3025-96-5	C02946	HMDB03681	0.4866	0.5045	0.9989	0.6494	0.7104	1.5253	1.7662	1.4509	2.0081	1.0019	0.8873	1.0566	0.5344	0.5907	0.5949	2.0357	1.4865	1.0359	0.7442	0.7833	1.4463	0.3699	0.6775	0.6004	0.7735	1.5417	1.7109	1.0011	0.5311	0.9265	1.4753	1.0478	1.1123	1.0727	1.6456	0.9217	1.7264
4162	4-acetylphenyl sulfate	Xenobiotics	Benzoate Metabolism	44620	LC/MS Neg	100000711	2375	215.002	4684006				0.6387	1.1781	7.592	0.2167	2.5636	2.1381	3.1555	2.3394	1.0513	0.7203	0.7036	0.1684	1.8906	0.8909	2.5419	0.4339	0.6148	1.0019	4.8488	0.9972	0.2389	0.4709	2.3156	0.8548	3.4159	0.0685	0.487	0.5964	1.0237	0.5922	1.0238	3.4277	1.2284	1.4584	0.867	2.8413	0.9981
5530	4-chlorobenzoic acid	Xenobiotics	Chemical	63988	LC/MS Neg	100021784	3015	154.99		74-11-3			1.257	1.2162	1.0854	0.9994	0.99	0.9564	0.8254	1.0006	0.9273	0.8019	0.9929	1.1326	1.3063	1.4276	1.0006	0.9797	1.065	1.3322	1.0531	0.8711	1.2016	1.105	1.0426	0.9347	1.0368	1.0522	0.9966	0.9854	0.9246	0.9677	0.9035	0.9146	1.1357	0.8571	0.9993	1.0531	0.9847
4167	4-ethylphenol glucuronide	Xenobiotics	Benzoate Metabolism	52937	LC/MS Neg	100009049	3167	297.098					0.737	1.5559	7.701	0.1775	1.8745	2.9755	1.5117	2.01	0.8912	0.387	0.6999	0.3682	2.9319	0.8163	1.3907	0.1775	0.4947	0.6932	4.4311	0.6873	0.1775	0.53	4.9462	1.3297	2.3203	0.1775	0.3841	0.5421	1.163	0.4093	0.9489	3.3725	1.3112	3.6246	1.1028	1.4339	0.2479
4166	4-ethylphenyl sulfate	Xenobiotics	Benzoate Metabolism	36099	LC/MS Neg	100001756	3580	201.023	20822574	123-07-9	C13637	HMDB62551	0.1664	0.9523	3.5628	0.1051	3.2029	2.5319	1.6679	1.5086	1.348	1.0513	0.3991	0.1961	1.2415	0.4084	1.221	0.3139	0.4626	0.8362	3.7323	0.6814	0.0233	0.7744	1.9834	1.1479	0.9155	0.0362	0.792	1.4231	1.3289	0.8745	1.0477	3.4779	1.309	2.758	0.2943	1.7757	0.7558
499	4-guanidinobutanoate	Amino Acid	Guanidino and Acetamido Metabolism	15681	LC/MS Pos Early	100000096	2320	146.092	500	463-003;463-00-3	C01035	HMDB03464	24.6643	12.2885	0.7539	1.6979	0.6624	4.9197	1.3152	0.8411	1.1827	1.0271	0.8212	1.006	1.338	2.1528	1.0189	0.7286	0.994	0.9207	0.9038	0.9619	1.8354	1.3119	2.5752	10.0335	9.4391	0.9019	0.9216	0.3169	0.4504	0.7549	14.7555	0.7205	5.0733	1.262	4.4626	0.4686	0.8176
4739	4-hydroxycinnamate	Xenobiotics	Food Component/Plant	36770	LC/MS Neg	100001675	1457	163.04	637542	501-98-4	C00811	HMDB02035	0.6823	1.4607	1.2774	0.7029	0.9441	1.7321	1.4781	0.4279	1.5154	0.844	0.8546	0.5802	1.2954	0.8065	0.4076	0.6298	0.3922	0.8342	1.67	0.8246	1.2613	0.7966	1.5013	1.1748	1.8777	1.4664	1.2495	0.5569	1.3302	1.1215	1.3525	0.9838	0.9334	0.7385	0.8473	1.8571	1.3867
48	4-hydroxyglutamate	Amino Acid	Glutamate Metabolism	40499	LC/MS Pos Early	100002544	1141	164.055	439902	2485-33-8	C03079	HMDB01344	0.7226	0.7029	0.5185	0.8654	0.6232	1.739	1.6126	1.6243	1.353	0.9971	0.8931	0.8725	0.7839	1.5236	0.856	1.8046	2.0885	1.3526	0.8088	1.5233	1.2241	0.9822	1.0191	0.6482	1.0029	1.062	1.0893	1.5285	1.6708	1.3313	0.7454	0.5783	0.6203	1.0271	0.9789	0.8152	1.1218
151	4-hydroxyphenylacetate	Amino Acid	Phenylalanine Metabolism	541	LC/MS Neg	144	1361	151.04	127	156-38-7	C00642	HMDB00020	1.1451	0.8906	1.4692	0.6539	0.325	0.9349	0.8605	0.325	0.9975	0.325	0.5573	0.325	1.5525	3.2894	0.325	0.325	0.325	0.831	1.1292	0.325	0.325	0.6003	1.5828	0.325	1.1806	2.4335	0.5109	0.325	0.9513	0.325	1.313	1.9447	1.0025	0.5218	1.683	1.0356	0.9288
165	4-hydroxyphenylpyruvate	Amino Acid	Tyrosine Metabolism	1669	LC/MS Neg	1141	1690	179.035	979	156-39-8	C01179	HMDB00707	3.9354	1.685	0.6219	0.824	0.8177	1.9829	2.2668	0.2548	1.9571	1.9362	0.915	1.1514	2.4925	0.5187	1.8468	1.7454	2.5331	1.5379	2.4433	0.8292	1.085	1.2949	0.7816	0.3948	0.7607	1.6248	0.785	0.5333	0.5407	1.2066	1.6712	0.4151	0.5358	0.1942	1.4495	0.1985	0.3799
90	4-imidazoleacetate	Amino Acid	Histidine Metabolism	32349	LC/MS Pos Early	100001207	2055	127.05	96215	645-65-8	C02835	HMDB02024	1.4549	2.234	1.9693	0.7949	0.7469	0.7813	0.7257	0.4593	1.0863	0.8393	1.1831	0.7027	1.7352	2.4034	1.0698	0.6024	0.3526	1.3409	0.5609	0.575	1.1462	1.966	2.422	1.482	1.1844	0.9279	1.3905	0.5322	0.6128	0.9717	1.5737	1.0734	1.0283	1.3701	1.2468	0.5315	0.6369
301	4-methyl-2-oxopentanoate	Amino Acid	Leucine, Isoleucine and Valine Metabolism	22116	LC/MS Neg	100000551	2170	129.056	70	816-66-0	C00233	HMDB00695	1.456	1.3093	1.01	0.9207	0.99	0.8734	1.2062	0.6041	1.2603	0.8878	1.323	1.3394	1.2778	1.2311	1.3438	0.9621	0.9335	1.3451	1.2966	0.9737	0.9504	1.2407	0.797	0.7283	0.5555	0.5577	0.7595	0.7837	0.6365	0.7393	1.5571	1.0291	1.3283	1.2857	1.0885	0.7013	0.6454
5481	4-methylbenzenesulfonate	Xenobiotics	Chemical	43592	LC/MS Neg	100002390	2350	171.012	6101	104-15-4	C06677		2.6564	1.689	4.7557	2.1511	2.0888	24.0738	18.8802	2.3583	27.6497	5.4915	0.5018	0.5018	0.5018	0.5018	0.5018	0.5018	0.5018	0.5785	0.9225	0.5018	0.7111	0.5018	0.5018	0.5018	0.6343	1.114	0.6302	0.5018	0.6324	0.7551	0.8993	0.6196	0.5018	0.5018	0.5018	0.5018	0.6671
4152	4-methylcatechol sulfate	Xenobiotics	Benzoate Metabolism	46146	LC/MS Neg	100004111	2665	203.002					0.1177	1.612	4.5441	0.1177	1.6146	1.6406	0.176	0.6829	1.8608	0.413	0.56	0.1177	1	0.8686	0.6412	0.5282	0.1177	0.6746	4.4484	1.0564	0.1177	0.1177	2.7821	0.1946	1.4884	1.6559	0.6113	1.1115	1.513	0.4132	0.5809	4.2484	0.6798	1.7483	0.4439	1.0208	0.5438
4679	4-vinylguaiacol sulfate	Xenobiotics	Food Component/Plant	48442	LC/MS Neg	100006126	3354	229.018					0.8384	0.3761	1.0879	0.4138	1	0.2957	0.2957	0.2957	0.6348	0.2957	0.2957	0.2957	0.2957	0.2957	0.2957	0.2957	0.2957	0.2957	1.4829	0.2957	0.9617	0.6533	1.229	0.811	1.1157	1.8326	1.3913	0.2957	1.4286	1.0152	0.6482	1.3144	0.4739	0.72	0.5122	1.0995	1.55
4168	4-vinylphenol sulfate	Xenobiotics	Benzoate Metabolism	36098	LC/MS Neg	100001755	3320	199.007	6426766	2628-17-3	C05627	HMDB62775	0.5491	0.9459	3.3794	0.4956	2.0458	1.7877	1.8049	0.8969	1.2804	0.5987	0.4997	0.2393	0.7545	0.3816	0.7655	0.5453	0.2762	0.738	2.9763	0.4804	0.6221	0.7296	1.8067	1.0541	1.268	0.8291	0.8855	1.0981	1.314	2.1032	2.0878	4.1109	1.338	1.9136	0.6423	1.8389	3.4002
112	5-(galactosylhydroxy)-L-lysine	Amino Acid	Lysine Metabolism	43582	LC/MS Pos Early	100002462	2755	325.161	123986	32448-36-5			0.6088	0.6748	0.4634	0.6154	0.5974	0.9161	1.1397	1.2469	0.9538	1.0632	1.2202	1.0013	0.8412	0.7111	0.8462	1.4871	1.4578	1.1954	1.1496	1.336	1.0163	0.9987	0.9086	0.9491	0.8971	1.0546	1.2378	1.1604	1.4464	1.315	0.7896	0.8221	0.9509	0.9063	0.9802	1.2777	1.1299
3895	5,6-dihydrouridine	Nucleotide	Pyrimidine Metabolism, Uracil containing	61833	LC/MS Neg	100001425	1119	245.078	94312	5627-05-04			0.8284	1.1012	0.7453	1.3927	1.1264	1.2222	0.7425	0.958	0.8649	0.7854	0.7333	0.8065	2.0587	1.459	1.0504	1.0487	1.1444	0.8245	1.0114	1.6356	0.7374	0.8704	1.4998	0.9886	1.1623	0.8764	1.0773	1.3937	0.807	1.2877	1.1901	0.7328	0.8726	0.8943	1.7189	1.1976	0.7809
1357	5-dodecenoate (12:1n7)	Lipid	Medium Chain Fatty Acid	33968	LC/MS Neg	100001232	5224	197.155	5312378	2430-94-6		HMDB00529	0.8287	0.9321	0.9049	0.772	1.3905	0.7943	0.2739	1.7456	0.2739	0.3907	0.8985	0.2739	0.8587	1.4572	1.045	1.2904	1.2852	0.6831	0.2939	1.0782	1.2657	1.9467	1.4123	0.9974	1.8025	1.1502	1.9619	0.9311	1.5069	1.4539	0.9081	0.6098	1.0026	1.1847	1.2157	0.7618	0.7491
267	5-hydroxyindoleacetate	Amino Acid	Tryptophan Metabolism	437	LC/MS Pos Early	71	1893	192.065	1826	54-16-0	C05635	HMDB00763	0.8918	0.8793	0.7501	1.0559	1.0445	1.0311	0.8441	1.048	0.8184	0.8299	0.8297	0.5789	0.9513	0.5533	0.7427	1.0449	0.6843	0.6718	0.599	0.5781	0.7112	1.9679	1.4517	1.436	0.7935	0.9689	2.7891	0.9182	1.5514	1.9773	1.5218	1.3244	2.1214	1.309	1.2928	1.5665	0.8448
111	5-hydroxylysine	Amino Acid	Lysine Metabolism	15685	LC/MS Pos Early	100000054	2790	163.108	1029	13204-98-3	C16741	HMDB00450	0.7726	0.6745	0.5284	0.6553	0.7475	0.8576	1.2215	1.3112	0.8782	0.8805	1.0802	0.8729	0.9944	0.8109	1.0056	1.4083	1.511	1.0748	1.1237	1.0712	1.2468	0.9149	0.8614	1.1893	0.97	1.3809	1.3503	1.2215	1.3683	1.4487	0.8642	0.9941	0.8763	0.8282	0.9373	1.1097	1.1075
3935	5-methyl-2'-deoxycytidine	Nucleotide	Pyrimidine Metabolism, Cytidine containing	38159	LC/MS Pos Early	100002300	2303	242.113	440055	838-07-3	C03592	HMDB02224	0.6334	0.7825	1.1163	0.7669	1.2	0.9727	0.8531	0.6035	0.8672	0.5003	0.6427	0.7008	1.1373	0.8214	0.621	0.7052	0.6757	0.5399	0.7807	0.7812	0.7768	1.3252	1.7751	1.5091	1.5583	2.2886	1.5789	0.512	1.8628	2.0199	0.883	1.0273	1.1029	1.29	1.5179	1.6566	1.2645
3926	5-methylcytidine	Nucleotide	Pyrimidine Metabolism, Cytidine containing	22119	LC/MS Pos Early	100000763	2227	258.108	92918	2140-61-6		HMDB00982	0.9479	0.6833	0.8528	1.0188	1.3654	0.9021	1.1729	1.0065	0.8874	0.7658	0.9096	0.7771	0.9453	1.0575	0.8819	0.9453	1.1369	0.9107	1.1191	0.9059	1.0143	1.081	1.3207	1.273	0.9291	1.8175	1.6128	1.4464	1.5854	1.5483	0.9527	1.0164	0.9935	0.7337	0.9843	0.8252	1.1433
3929	5-methylcytosine	Nucleotide	Pyrimidine Metabolism, Cytidine containing	21106	LC/MS Pos Early	1049	2195	126.066	65040	58366-64-6	C02376	HMDB02894	1.065	1.4507	3.9009	0.6388	0.1484	0.9506	0.1484	0.1484	0.2478	0.1484	1.1198	1.2485	0.7733	1	0.1484	0.5148	0.4644	2.8783	0.3703	0.2768	0.2155	0.4683	1.5757	0.1484	0.7359	0.8059	0.3052	0.5026	0.7603	0.3228	2.7886	1.646	2.8439	4.8025	4.3481	4.1442	2.5817
492	5-methylthioadenosine (MTA)	Amino Acid	Polyamine Metabolism	1419	LC/MS Pos Early	212	2752	298.097	439176	2457-80-9	C00170	HMDB01173	0.9242	1.1614	0.9769	1.4933	0.3337	1.8089	1.7915	1.0056	1.9569	1.2528	1.2422	1.4195	1.6718	1.455	1.6386	1.9547	2.3027	1.4435	2.4964	1.5568	1.2238	0.5087	0.2663	0.8059	0.3833	0.5688	0.5422	1.3707	0.6323	0.5672	0.7875	1.1568	0.5517	0.9944	0.6262	0.3641	0.8849
393	5-methylthioribose	Amino Acid	Methionine, Cysteine, SAM and Taurine Metabolism	62100	LC/MS Pos Early	100002103	790	181.053	494	23656-67-9		HMDB01087	0.9404	0.9149	0.6641	1.0173	0.7195	1.4149	1.7556	1.6877	1.7124	1.774	1.3628	1.1294	0.859	1.1637	0.8743	1.7311	0.3676	1.2157	0.3074	0.3041	1.1409	0.9827	0.9571	0.9722	0.8418	0.8697	1.5551	1.079	1.0649	1.3057	0.7787	0.9714	0.8998	1.081	1.1481	0.8832	1.151
3897	5-methyluridine (ribothymidine)	Nucleotide	Pyrimidine Metabolism, Uracil containing	35136	LC/MS Neg	100001446	1778.1	257.078	445408	1463-10-1		HMDB00884	1.0031	0.8448	0.9969	0.8517	0.7509	1.374	1.6051	1.2933	1.7032	1.2073	0.718	0.616	0.8012	0.7212	0.6317	1.4872	1.273	1.2473	1.4609	1.6021	0.9389	0.9402	0.9264	0.8767	0.9505	1.3998	1.694	1.3772	1.5139	1.585	0.8707	0.7945	0.7076	0.6293	0.9717	1.3962	0.8645
512	5-oxoproline	Amino Acid	Glutathione Metabolism	1494	LC/MS Neg	1021	738.5	128.035	7405	98-79-3	C01879	HMDB00267	0.978	1.3166	1.7757	1.1019	1.2071	0.843	0.5734	0.771	0.631	1.2011	1.1041	1.4739	1.0608	1.9441	0.8255	0.6976	2.1885	0.9799	0.8437	0.7787	0.8509	0.9014	1.1911	0.9942	0.9901	1.0278	1.2405	1.5302	1.076	1.0638	0.9038	0.8176	0.951	1.4458	1.2891	1.0058	0.8874
125	6-oxopiperidine-2-carboxylate	Amino Acid	Lysine Metabolism	43231	LC/MS Neg	100004499	965	142.051	3014237	34622-39-4		HMDB61705	1.4381	1.4005	1.4017	0.9957	0.9259	1.2055	0.8282	0.5598	1.2372	1.0403	0.8258	0.8418	1.0614	1.0431	0.5882	0.6696	0.6248	0.7907	0.9042	0.5231	1.0097	1.8581	3.7573	0.9342	1.0043	1.093	1.2124	0.7424	1.3219	0.7727	5.3012	0.8359	0.7299	1.5325	0.4507	1.3456	1.0958
2917	7-HOCA	Lipid	Sterol	36776	LC/MS Neg	100001609	5288.1	429.301	3081085	115538-85-7	C17337	HMDB12458	1.6472	1.0635	2.2063	1.0315	1.9155	0.5595	1.2356	2.2649	1.3208	2.5897	0.4514	0.6566	0.2431	0.5623	0.6612	0.6726	1.0807	0.3352	0.6049	0.8417	0.834	1.1378	1.0274	1.0609	1.004	0.8586	1.5565	0.3843	0.8866	0.996	1.4776	1.0337	1.3973	0.873	1.0199	0.8374	0.5695
285	7-hydroxyindole sulfate	Amino Acid	Tryptophan Metabolism	52915	LC/MS Neg	100009043	1765	212.002					2.223	18.996	22.2335	5.8146	3.3214	0.4851	0.7079	0.1017	0.2217	0.1405	3.0747	0.7403	1.0514	10.8098	0.9486	0.1901	0.103	0.2744	0.836	0.1017	3.3165	1.2273	14.3445	4.8587	33.5423	0.5936	0.1017	0.1017	0.1612	0.123	6.319	1.2027	6.1564	5.4346	4.7859	0.3003	0.6489
3860	7-methylguanine	Nucleotide	Purine Metabolism, Guanine containing	35114	LC/MS Pos Early	100001456	2175	166.072	11361	578-76-7	C02242	HMDB00897	0.9698	0.9965	1.1035	1.0101	0.8881	0.7078	0.8298	0.8928	0.9395	0.6721	0.7414	0.5297	0.7841	0.6309	0.6678	0.9142	1.1533	0.8676	1.0877	0.8254	1.0429	1.0649	1.4011	0.9442	1.0955	1.2287	1.4449	0.8728	1.2261	1.0668	1.3054	1.1463	0.964	1.1676	1.0035	1.0793	1.0561
1815	9,10-DiHOME	Lipid	Fatty Acid, Dihydroxy	38399	LC/MS Neg	179	5180	313.238	9966640	263399-34-4	C14828	HMDB04704	1.0172	0.9828	0.4777	0.3011	0.6904	0.5509	0.3818	0.4993	0.2909	0.2568	0.3589	0.2326	0.8605	0.7654	0.5332	0.8127	1.3553	0.4414	0.5136	1.0549	3.2099	1.8065	1.373	1.0583	1.0323	1.2384	2.2651	0.2967	2.3687	1.7571	1.0227	2.3126	3.8985	1.6589	2.9542	0.9581	0.883
1653	acetylcarnitine (C2)	Lipid	Fatty Acid Metabolism (Acyl Carnitine, Short Chain)	32198	LC/MS Pos Early	100000802	2282	204.123	1	5080-50-2	C02571	HMDB00201	1.4102	0.9479	0.5448	1.0465	1.1079	1.2121	0.7107	1.1286	0.6962	0.4499	1.7996	1.4951	1.0879	2.0307	1.1895	0.7361	0.446	0.4982	0.3769	0.5007	0.9359	0.8689	1.5588	0.987	1.1207	0.4921	0.7636	0.5999	0.5573	0.8219	1.013	0.8508	1.1791	1.3944	1.2021	1.0411	1.3713
1304	aconitate [cis or trans]	Energy	TCA Cycle	46173	LC/MS Neg	100001359	580	173.009					1.2076	0.9433	0.9033	0.9947	1.1196	1.2091	1.0053	1.265	1.2548	0.8117	0.7784	0.8348	0.8476	1.0872	0.8835	1.3255	1.1633	1.0223	0.9493	0.9499	0.9484	1.6313	1.3699	0.8161	1.3193	1.1947	1.1984	1.096	1.0403	1.0711	0.9361	0.8371	0.7875	0.9466	0.8118	0.8661	0.8348
3814	AMP	Nucleotide	Purine Metabolism, Adenine containing	32342	LC/MS Pos Early	209	1013	348.07	6083	149022-20-8	C00020	HMDB00045	1.4314	1.0082	0.8585	0.7592	1.3221	0.467	0.467	0.467	0.467	0.467	0.5105	0.6819	0.467	34.4736	0.8217	1.2332	0.467	0.467	0.467	0.5681	0.467	1.3538	1.59	1.1821	0.9429	1.4682	0.467	0.9609	1.1617	0.8692	0.467	0.5402	0.467	0.9918	0.9174	1.6751	1.3431
1508	adipate	Lipid	Fatty Acid, Dicarboxylate	21134	LC/MS Polar	100000863	3000	145.051	196	124-04-9	C06104	HMDB00448	1.0994	1.0065	1.288	0.484	0.6878	0.7961	0.7233	1.2095	0.9546	0.3523	0.381	0.4396	0.9188	0.6663	0.7258	2.2274	7.6725	1.1953	1.0117	1.3883	1.0331	0.5698	0.9935	0.9584	1.3693	1.2726	1.0656	0.5871	1.1526	1.1354	0.7902	0.7208	1.1267	1.1372	1.6192	1.8636	0.7688
1705	adipoylcarnitine (C6-DC)	Lipid	Fatty Acid Metabolism (Acyl Carnitine, Dicarboxylate)	52988	LC/MS Pos Early	100006614	2570	290.16	71296139			HMDB61677	0.8372	0.5788	0.9764	1.0154	1.0936	0.3039	0.3553	1.2772	0.5094	0.3039	1.4806	0.9206	0.9846	1.2477	1.1731	1.4362	2.4486	0.8487	0.333	1.0304	0.4036	0.6986	1.2777	1.0518	1.4935	0.3187	0.3483	0.5195	0.3084	1.0242	1.2206	0.3039	1.0864	1.0917	1.0267	0.7981	0.3039
1421	adrenate (22:4n6)	Lipid	Long Chain Polyunsaturated Fatty Acid (n3 and n6)	32980	LC/MS Neg	100001193	5678	331.264	5497181	2091-25-0	C16527	HMDB02226	1.0813	0.8597	1.0859	0.7378	1.5184	0.6607	0.3742	1.4815	0.447	0.4633	0.3453	0.5315	0.4667	0.4839	0.9742	1.4843	1.5565	1.3281	0.4582	1.4572	1.4094	1.5128	1.4365	1.622	1.1986	1.4511	1.6808	1.2257	1.3841	1.6086	0.7373	0.8927	0.9733	0.9192	1.1576	0.8744	0.3345
28	alanine	Amino Acid	Alanine and Aspartate Metabolism	1126	LC/MS Pos Early	811	1700	90.055	5950	56-41-7	C00041	HMDB00161	0.8665	0.9464	0.6444	0.7432	0.7882	1.1466	1.1399	0.9296	0.8397	0.8591	0.9911	0.9579	0.9489	1.0694	1.0369	0.9095	1.2621	0.9704	1.0722	0.9514	1.0983	0.963	1.0152	1.0031	0.9022	1.3293	1.0357	0.9969	1.1668	1.1507	0.8969	1.0761	0.9374	1.4064	1.0533	1.0296	1.0477
3809	allantoic acid	Nucleotide	Purine Metabolism, (Hypo)Xanthine/Inosine containing	33434	LC/MS Polar	218	2960	175.047	203	99-16-1	C00499	HMDB01209	1.5281	1.1237	1	1.1761	1.1901	0.5495	0.4714	0.2538	0.5253	0.2538	0.2538	0.2538	0.2538	0.2538	0.2538	0.2826	0.2538	0.547	0.9144	0.7823	1.0499	1.674	1.028	1.2783	1.8184	1.2199	0.8767	0.9986	1.912	1.6245	1.2764	0.4012	0.4271	1.2812	1.1621	0.881	0.7278
3808	allantoin	Nucleotide	Purine Metabolism, (Hypo)Xanthine/Inosine containing	1107	LC/MS Polar	1002	1672	157.037	204	97-59-6	C02350	HMDB00462	2.0464	1.3233	1.1246	0.9076	0.9908	1.8352	0.987	1.2987	1.0524	0.7894	0.5901	0.4549	0.6456	0.8855	0.4794	0.6174	0.5191	0.6379	0.6442	0.5777	1.1248	1.1319	1.0733	0.7439	1.1433	0.828	1.076	0.8058	1.1547	1.1667	1.8657	0.9339	1.429	1.0772	2.2399	1.1011	1.0092
18	allo-threonine	Amino Acid	Glycine, Serine and Threonine Metabolism	15142	LC/MS Polar	100000272	2511.1	118.051	99289	28954-12-3	C05519	HMDB04041	1.349	0.8099	0.1068	1.6499	0.7283	0.888	1.5042	0.9532	0.8112	1.0046	0.7374	0.6374	1.0892	1.1267	1.8041	0.6375	0.9722	1.0559	0.6057	1.0772	1.1123	1.5764	1.5164	1.1139	1.3659	0.4901	0.6307	1.6896	1.1189	1.2392	0.6372	0.6287	0.9954	1.0814	0.4538	1.2942	1.2105
1749	alpha-hydroxycaproate	Lipid	Fatty Acid, Monohydroxy	37073	LC/MS Neg	100001723	1920	131.071	99824	6064-63-7		HMDB01624	1.1196	0.4932	1.9223	0.7919	0.4932	0.4932	0.4932	0.4932	0.4932	0.7712	1.269	0.8844	1.007	0.4932	0.944	0.784	1.2536	0.993	1.6618	0.4932	0.4932	0.4932	2.0293	0.7606	0.4932	0.4932	0.4932	0.4932	1.6517	0.8143	4.2042	1.8649	4.6228	0.9736	1.5811	0.7714	0.5486
305	alpha-hydroxyisocaproate	Amino Acid	Leucine, Isoleucine and Valine Metabolism	22132	LC/MS Neg	100000706	1840	131.071	83697	10303-64-7	C03264	HMDB00746	1.5597	1.2532	0.9756	0.5402	1.9522	0.7032	0.688	0.3704	0.5422	0.5884	1.114	1.6989	1.0204	1.3608	0.5293	0.5863	0.6121	1.5066	0.8353	0.8416	0.8596	0.8016	2.5063	0.6926	0.5699	0.8034	0.4252	1.0699	0.8582	0.9796	7.2944	1.2366	6.4989	2.9109	6.8096	3.1526	3.0887
370	alpha-hydroxyisovalerate	Amino Acid	Leucine, Isoleucine and Valine Metabolism	33937	LC/MS Neg	100001300	1126	117.056	99823	600-37-3		HMDB00407	1.0077	1.0117	0.9226	1.1094	2.4439	0.5995	0.6206	0.3199	0.7194	0.4508	0.6808	1.7874	0.8178	0.7627	0.61	1.0429	0.6812	1.0394	0.623	0.9708	0.8179	1.037	3.0304	0.9539	0.5139	0.8786	0.6395	0.9923	1.4699	0.9785	4.1453	1.1569	4.3976	2.7967	2.6569	1.9762	6.4224
400	alpha-ketobutyrate	Amino Acid	Methionine, Cysteine, SAM and Taurine Metabolism	4968	LC/MS Polar	796	940	101.024	58	600-18-0	C00109	HMDB00005	1.457	0.9005	2.49	2.027	0.7766	0.4489	0.4489	1.3932	3.0346	0.4489	1.4068	0.8773	1.0684	1	2.1959	1.0702	2.2167	1.6875	0.9538	0.8152	0.6351	0.7582	0.4489	0.4489	0.4886	0.4489	1.2742	0.9308	0.4489	0.8633	0.4489	0.4489	1.0828	1.128	0.9967	0.4489	0.4489
44	alpha-ketoglutaramate*	Amino Acid	Glutamate Metabolism	62101	LC/MS Polar	100002397	1916	144.03	48	18465-19-5			0.9784	0.7687	0.9311	0.8773	0.7534	1.7082	1.2465	0.9913	1.6044	1.131	0.6382	0.523	0.6386	0.6453	0.6997	1.5949	1.121	1.2122	1.702	0.8161	0.7548	0.9159	1.0087	1.2137	1.0605	1.1624	1.4717	1.4379	1.1174	1.6746	0.9148	0.7007	0.8267	0.8404	0.8858	0.8901	1.7235
1308	alpha-ketoglutarate	Energy	TCA Cycle	528	LC/MS Polar	93	2700	145.014	51	305-72-6;328-50-7;22202-68-2	C00026	HMDB00208	1.2175	1.042	1.1412	1.3367	0.6533	1.0332	1.0116	1.5284	1.3294	0.8368	1.0537	1.3723	2.2124	0.619	1.3261	1.5699	1.4782	1.6034	1.7799	1.7749	0.7283	0.6589	1.1163	0.6887	0.7913	0.9722	0.578	0.6633	0.5708	0.5402	0.9473	0.7829	0.7563	0.6333	0.9884	1.1346	0.7237
4023	alpha-tocopherol	Cofactors and Vitamins	Tocopherol Metabolism	1561	LC/MS Pos Late	1105	2522	430.378	14985	59-02-9;10191-41-0	C02477	HMDB01893	1.5753	2.1969	1.7548	1.5661	1.5462	1.3473	1.6984	1.6076	1.6764	1.6745	0.9603	0.5656	0.8516	0.2103	0.7492	1.2899	1.1383	1.246	0.9867	0.956	1.3596	0.8837	0.9878	1.2417	1.0574	1.0017	1.1742	1.1386	1.3383	0.9983	0.3771	0.8727	0.7846	0.6659	0.5077	0.601	0.2574
4029	alpha-tocotrienol	Cofactors and Vitamins	Tocopherol Metabolism	37502	LC/MS Pos Late	100001979	1986	424.334	5282347	58864-81-6	C14153	HMDB06327	0.9556	3.4349	0.9423	1.9439	1.7667	1.6053	0.8083	0.3401	1.4924	0.9963	0.0983	0.0983	0.5835	0.0983	0.1095	0.9337	1.1836	1.2662	2.1545	0.8108	1.9943	0.8073	0.9421	1.3133	0.2961	1.2117	1.3642	0.97	2.8525	2.0375	0.0983	1.0037	1.9594	1.3583	0.5723	1.2529	0.0983
82	anserine	Amino Acid	Histidine Metabolism	15747	LC/MS Neg	100000044	1124.8	239.115	112072	10030-52-1	C01262	HMDB00194	1.056	0.5703	0.4838	0.7958	0.773	1.2481	1.3896	2.2605	1.0777	1.1015	0.9951	0.94	0.9594	2.5841	0.9807	0.8759	0.9049	1.0349	0.7604	0.6683	0.9709	1.2884	0.9607	1.7026	1.598	1.0144	0.8488	1.7266	1.1367	0.8915	1.0849	1.2957	1.6416	1.2038	1.0049	0.7672	0.7619
1139	arabinose	Carbohydrate	Pentose Metabolism	575	LC/MS Polar	828	1804.5	195.051	66308	28697-53-2	C00216	HMDB00646	1.0656	1	1.1338	1.5092	0.9034	0.7009	2.3213	1.5583	0.7009	0.7009	1.1548	1.6286	0.7009	0.7009	1.1847	0.7655	0.8526	0.722	0.7692	0.9116	1.8568	1.6023	0.8289	0.9616	1.5246	1.344	1.0454	1.1543	1.0088	0.7009	0.9748	0.9208	0.9592	1.0303	0.8731	0.7009	0.9091
1147	arabitol/xylitol	Carbohydrate	Pentose Metabolism	48885	LC/MS Polar	100006430	1932.4	151.061	6912;94154				1.0192	1.3852	0.6958	1.0442	0.7768	0.7039	0.6913	0.7003	0.6353	0.593	0.5451	0.3885	0.8196	0.5539	0.652	1.006	0.7452	0.9941	1.6255	0.9996	0.8143	1.1545	0.9513	1.0004	1.3308	1.1404	1.3148	1.2716	1.594	1.1892	1.1683	0.8052	0.9698	1.0395	1.1877	1.2836	1.0559
1153	arabonate/xylonate	Carbohydrate	Pentose Metabolism	48255	LC/MS Polar	100006115	2700	165.041	122045;6602431				1.1384	1.3973	0.9794	1.1376	0.852	0.9027	1.2905	0.5797	1.2548	0.9623	0.874	0.6369	0.693	0.8845	0.864	0.7004	0.6923	0.6894	0.7767	0.847	1.2078	1.4175	1.4639	1.132	1.7594	1.0206	0.9336	1.3621	1.4578	1.285	1.2496	0.8347	0.8581	1.3125	1.1555	1.4077	1.176
1366	arachidate (20:0)	Lipid	Long Chain Saturated Fatty Acid	1118	LC/MS Neg	893	6240	311.296	10467	506-30-9	C06425	HMDB02212	1.0227	0.797	1.0609	0.8534	1.0592	0.5495	0.7121	1.1212	0.6942	0.5998	0.5821	0.624	0.7049	1.0705	0.7164	1.1771	1.2108	0.9625	0.7283	0.7898	2.3528	1.8671	1.2935	1.425	1.0216	1.1492	1.9737	0.6744	1.6247	1.8722	0.61	1.0655	2.0592	1.67	1.7224	0.7705	0.5558
1419	arachidonate (20:4n6)	Lipid	Long Chain Polyunsaturated Fatty Acid (n3 and n6)	1110	LC/MS Neg	229	5535	303.233	444899	506-32-1	C00219	HMDB01043	1.5019	1.0656	1.5544	1.0906	1.5865	0.7832	0.5083	1.4999	0.5736	0.582	0.3997	0.3757	0.4899	0.4822	0.621	1.0106	1.3381	0.6584	0.4381	0.8656	1.3257	1.6111	1.5407	1.8518	1.5107	1.6448	1.5054	1.1453	1.1809	1.6498	0.8007	0.8391	0.9696	0.9391	1.0861	0.9894	0.5782
1743	arachidonoylcholine	Lipid	Fatty Acid Metabolism (Acyl Choline)	53261	LC/MS Pos Late	100009332	1390	390.337					0.7546	1	3.4271	0.7808	4.2009	0.5165	0.8996	1.0719	0.8207	1.8447	0.3033	0.3033	0.3033	0.3033	0.3033	0.6772	0.3033	0.3033	0.5673	0.3033	1.6553	1.2871	1.2273	2.3287	0.8978	0.987	0.8369	0.7865	0.6727	1.1703	0.5178	2.6636	0.4214	1.2281	0.944	2.2155	1.2545
461	argininate*	Amino Acid	Urea cycle; Arginine and Proline Metabolism	57461	LC/MS Pos Early	100002769	2150	176.103	160437	157-07-3		HMDB03148	1.5057	1.4135	0.78	1.0284	0.5896	1.0748	0.8063	0.7961	0.8338	0.7731	0.5805	0.7777	0.9033	1.0586	0.8277	0.789	0.6142	1.2697	1.0277	0.6662	1.3164	0.9282	2.1875	1.2572	1.6062	1.0656	1.0459	0.5546	0.8009	0.9074	2.4978	0.6858	1.1104	1.8016	1.4416	0.8177	1.3632
424	arginine	Amino Acid	Urea cycle; Arginine and Proline Metabolism	1638	LC/MS Pos Early	231	2825	175.119	232	1119-34-2	C00062	HMDB00517	1.1672	0.8512	0.7623	0.7623	1.0414	0.967	1.2163	0.8236	1.1304	1.0006	0.9486	0.7941	0.9667	1.1261	0.9994	1.1302	1.0833	1.1312	1.1162	0.8795	0.9166	1.0943	1.1415	0.921	0.8851	0.967	1.2765	1.0648	1.1439	1.266	1.1618	0.9736	0.7641	0.9631	0.9082	0.9795	1.0771
425	argininosuccinate	Amino Acid	Urea cycle; Arginine and Proline Metabolism	15497	LC/MS Pos Early	232	2745	291.13	16950	156637-58-0	C03406	HMDB00052	0.4389	0.478	0.4516	0.6242	0.246	1.0695	0.9718	0.991	0.8731	0.822	1.2692	0.6787	0.6893	1.067	0.4923	2.0113	1.6121	2.4447	1.009	0.7422	1.1913	1.3748	0.8712	0.5859	0.623	0.4846	1.6149	0.9	0.8901	1.7459	0.5966	1.2613	1.3594	1.8283	1.2038	1.1278	1.6888
4012	ascorbic acid 2-sulfate	Cofactors and Vitamins	Ascorbate and Aldarate Metabolism	63590	LC/MS Polar	100009329	3042	254.982	86484				0.5444	0.5649	1.1207	1.2357	0.7149	1.2882	3.9756	2.0848	1.8405	3.1291	0.4611	0.6233	0.3396	0.2112	1.5271	0.9752	1.0358	1.3663	0.9339	1.4867	0.7854	1.066	1.0248	1.1434	0.8087	0.8912	1.2214	1.7257	1.0584	0.9138	0.9104	0.4319	0.4771	0.7157	0.4781	1.5639	2.2207
4013	ascorbic acid 3-sulfate*	Cofactors and Vitamins	Ascorbate and Aldarate Metabolism	63687	LC/MS Polar	100020409	2025	254.982	11425365				0.5665	0.5104	1.893	1.9871	1.8839	1.1383	2.3379	1.875	2.5769	2.4299	0.4167	0.6155	0.6386	0.2842	1.0061	1.2909	1.397	0.7549	1.0727	2.5001	0.9939	0.8468	0.6745	1.1579	0.9507	1.3505	1.2269	2.0373	1.0982	1.1357	1.0452	0.4022	0.4193	0.5893	0.9243	0.9626	0.9157
39	asparagine	Amino Acid	Alanine and Aspartate Metabolism	512	LC/MS Pos Early	917	1225	133.061	6267	70-47-3	C00152	HMDB00168	1.7565	1.1098	0.5941	0.0194	0.6427	0.0625	2.2843	0.0113	2.0339	1.4138	0.9956	1.1537	1.053	0.0211	1.294	0.482	1.2875	1.6509	2.1461	1.7505	1.375	0.8138	0.1496	1.2407	0.4324	1.1408	0.0253	0.0217	0.0558	0.3065	1.3106	1.0044	0.5465	1.1113	1.0741	0.2538	0.9915
35	aspartate	Amino Acid	Alanine and Aspartate Metabolism	443	LC/MS Pos Early	234	1165	134.045	5960	56-84-8	C00049	HMDB00191	0.9019	0.4434	0.6824	1.1297	1.0139	1.7425	0.8504	0.8925	0.5094	0.7748	0.823	0.4503	0.5699	1.2401	0.6375	1.1638	1.0267	0.4437	0.3424	0.4055	0.9861	1.5153	1.3488	1.1811	1.3468	1.28	1.7495	1.5712	1.9888	2.1403	0.6603	0.9019	1.1062	1.152	0.8059	1.2234	1.1359
1522	azelate (C9-DC)	Lipid	Fatty Acid, Dicarboxylate	18362	LC/MS Neg	2029	1276	187.098	2266	123-99-9	C08261	HMDB00784	0.8009	0.8694	0.7889	0.4732	0.6055	0.8752	1.1095	1.0086	0.5741	0.512	0.8707	0.4732	1.2239	1.5942	0.8614	0.7271	0.944	0.4732	1.1772	0.4732	2.0927	1.4011	1.6617	2.31	3.8545	0.9433	1.2657	0.4732	0.5813	1.167	2.8427	3.4253	3.2365	2.095	5.2377	1.7144	0.9914
1368	behenate (22:0)*	Lipid	Long Chain Saturated Fatty Acid	12125	LC/MS Neg	314	6745	339.327	8215	112-85-6	C08281	HMDB00944	1.4429	1.1106	1.2612	0.9963	1.3469	0.7551	0.6889	0.9411	0.6927	0.6007	0.4092	0.4001	0.6848	0.9899	0.5247	1.1509	0.9201	1.0216	1.0078	0.8667	2.9274	2.8582	1.4471	2.578	1.8123	1.7042	2.5677	0.8897	2.4341	2.2738	0.6983	1.0037	2.2164	1.8798	1.6609	0.7996	0.3158
2814	behenoyl dihydrosphingomyelin (d18:0/22:0)*	Lipid	Dihydrosphingomyelins	57331	LC/MS Pos Late	100009026	3150	789.684				HMDB12091	0.5768	0.876	0.977	0.7786	1.152	0.3983	0.9979	1.0138	2.6588	0.7866	0.7035	0.5981	1.285	1.4551	0.6614	1.0021	1.0296	1.5813	1.5836	1.2664	0.6039	0.4307	0.5317	1.1451	1.525	1.2117	0.99	1.8444	3.1575	1.1239	1.3585	0.8189	0.7696	1.3443	0.3151	1.5548	0.5275
2820	behenoyl sphingomyelin (d18:1/22:0)*	Lipid	Sphingomyelins	48492	LC/MS Pos Late	100006294	3083	787.669				HMDB12103	0.8733	1.3894	0.9804	0.8599	0.926	0.7721	1.2799	1.293	1.0494	1.1171	0.892	0.8602	0.7553	0.9624	0.7812	1.0557	1.0289	1.1586	1.0061	1.2273	1.141	0.6749	0.6795	1.0213	1.2849	1.0127	1.0313	1.4485	1.264	0.9939	1.189	1.021	0.8704	0.8931	0.8396	1.1069	0.7456
4125	benzoate	Xenobiotics	Benzoate Metabolism	15778	LC/MS Neg	100000008	1750	121.029	243	65-85-0	C00180	HMDB01870	0.8927	2.4123	3.6327	0.5864	1.1056	1.0004	1.329	0.7793	1.1035	0.6084	0.7504	0.5761	1.6199	1.469	0.9473	0.5967	0.7692	0.9476	0.9757	0.5918	0.6844	0.8534	2.0741	0.9996	2.0156	1.1887	1.4989	1.6112	1.8626	1.478	0.6697	0.6025	1.168	1.0757	0.9721	1.7627	0.8345
3912	beta-alanine	Nucleotide	Pyrimidine Metabolism, Uracil containing	55	LC/MS Pos Early	244	1905	90.055	239	56-41-7;107-95-9	C00099	HMDB00056	0.9432	1.2337	1.0697	0.7157	0.5942	1.0586	2.5031	1.7838	1.2157	1.1695	1.463	1.1701	1.609	2.963	1.4766	1.8242	1.6402	1.1442	1.8309	2.0429	0.8067	0.8424	0.9035	0.6179	0.707	1.7164	0.8024	0.7787	0.587	1.4421	0.8525	0.7479	0.5452	0.8929	0.6403	0.9748	0.6966
54	beta-citrylglutamate	Amino Acid	Glutamate Metabolism	54923	LC/MS Neg	100003271	530	320.062	72715786	73590-26-8	C20775		1.1842	0.3556	0.3366	0.4324	0.7164	0.9856	0.3366	1.6737	0.3366	0.3366	0.6329	0.7873	0.851	1.0147	1.5369	1.5191	1.3054	0.9827	0.8434	0.4857	0.8033	1.8601	2.631	1.4068	1.8318	0.857	1.0144	1.0406	2.4213	0.8805	0.3366	0.3366	0.5531	0.9346	1.4196	2.3026	1.2947
4094	beta-cryptoxanthin	Cofactors and Vitamins	Vitamin A Metabolism	57591	LC/MS Pos Late	100001977	2560	552.433	6384256	472-70-8		HMDB33844	1.3951	3.8079	0.7796	1.7504	1.949	0.6421	1.0888	0.9958	1.0544	1.0935	1.0833	0.4492	0.6032	0.5887	0.3933	1.0297	1.0087	0.9943	1.2257	1.0042	1.6121	0.8644	0.6994	1.5525	1.1925	1.1838	1.0343	1.1668	1.7474	1.1697	0.0391	0.8521	0.4057	0.3639	0.1983	0.3203	0.1294
4412	beta-guanidinopropanoate	Xenobiotics	Food Component/Plant	35101	LC/MS Pos Early	100001411	2145	132.077	67701	353-09-3	C03065	HMDB13222	1.0258	0.5118	0.3093	0.5526	0.291	2.477	1.7235	1.8986	1.9485	1.5446	0.6409	0.7185	0.7959	0.5816	0.5839	1.093	8.4772	2.2213	1.3086	2.1846	0.5357	0.2547	0.5214	0.5518	0.479	2.2587	1.2265	2.3162	1.3615	1.1956	0.2547	0.2882	0.5091	0.5291	0.3415	1	3.514
318	beta-hydroxyisovalerate	Amino Acid	Leucine, Isoleucine and Valine Metabolism	12129	LC/MS Neg	1442	1027	117.056	69362	625-08-1		HMDB00754	0.6844	0.3763	0.4508	1.8749	0.9345	0.9431	0.5176	0.3652	1.6885	0.4871	0.6515	0.9283	0.5548	0.5134	1.2691	0.4782	1.0569	1.7708	1.1352	0.809	1.6449	2.0889	0.6202	1.5352	1.1996	0.5752	2.3931	0.5988	0.9318	2.1233	3.2912	2.2222	1.2008	1.2477	1.4731	0.7826	1.5018
6	betaine	Amino Acid	Glycine, Serine and Threonine Metabolism	3141	LC/MS Pos Early	799	1064	118.086	247	107-43-7	C00719	HMDB00043	1.3137	1.5657	1.1073	1.1632	1.2379	0.8417	1.1244	0.7001	1.2343	0.9727	1.3477	1.3026	0.8218	1.8751	0.9321	0.5125	0.4008	0.4655	0.5335	0.3872	1.3746	1.2139	1.0273	1.2293	1.2472	0.6864	0.5333	0.485	0.7119	0.6119	1.5275	1.4681	1.3758	1.5911	1.2444	0.5562	0.7655
2931	beta-sitosterol	Lipid	Sterol	27414	LC/MS Pos Late	100001033	3054	397.383	222284	83-46-5	C01753	HMDB00852	2.2774	2.9326	0.8149	2.0688	0.8287	0.7116	0.8347	1.0219	1.3072	1.1641	0.3778	0.3579	0.3579	1.2312	0.3579	0.6658	0.5399	0.8703	0.8146	0.8903	2.3226	1.4467	1.5383	2.1005	1.0941	1.0259	2	2.8441	1.951	0.7609	0.3635	0.4367	1	1.0786	0.6779	0.504	0.3579
4068	bilirubin	Cofactors and Vitamins	Hemoglobin and Porphyrin Metabolism	43807	LC/MS Pos Late	1090	1840	585.271	5280352	635-65-4	C00486	HMDB00054	1.0731	1.0218	0.9765	0.8288	1	0.7806	1.0064	1.9123	0.7221	1.0584	0.4993	0.7282	0.7568	0.4366	0.7644	1.0935	1.4322	1.5283	1.2502	1.0515	1.478	0.9362	1.4903	1.0244	1.2295	1.0926	1.4505	3.2932	2.2529	1.1753	0.6336	0.6784	0.6841	0.8402	0.8138	0.4588	0.4507
4071	biliverdin	Cofactors and Vitamins	Hemoglobin and Porphyrin Metabolism	2137	LC/MS Neg	250	4695.6	581.241	5353439	55482-27-4;55482-27-4	C00500	HMDB01008	0.8549	0.4091	1.0471	0.3647	0.6989	0.5396	1.1203	2.0986	0.7716	1.0218	0.4827	0.5647	0.5374	0.483	0.8048	1.1826	2.2362	1.3246	0.7533	2.3197	0.9588	0.8151	1.3552	1.3106	1.4122	1.6091	1.5954	3.3323	2.5475	1.3028	0.9782	0.6302	0.9776	0.8387	1.6586	1.0356	0.9403
5630	branched-chain, straight-chain, or cyclopropyl 12:1 fatty acid*	Partially Characterized Molecules	Partially Characterized Molecules	63683	LC/MS Neg	100021709	5261	197.155					1.9848	0.6071	0.7613	0.6468	1.4144	0.0733	0.0733	1.2128	0.3103	1.5763	0.5168	1.9203	0.5937	0.9075	2.4519	1.3448	1.3251	0.9535	0.2045	3.2736	1.1278	0.9619	1.2897	0.5181	1.0234	0.8373	3.8516	1.0724	1.2801	1	2.4696	0.2825	1.2625	2.1485	1.8373	0.4216	0.6
1345	butyrate (4:0)	Lipid	Short Chain Fatty Acid	40605	LC/MS Neg	1143	1062	87.0452	264	109-92-6	C00246	HMDB00039	1.1558	0.9388	1.0276	0.796	1.4733	1.1684	1.346	1.4942	0.8237	0.9215	0.7106	0.7294	1.2393	1.3048	1.0676	1.3546	1.1245	1.4859	1.7293	1.3606	1.7095	2.7661	3.1964	3.3307	0.5496	0.6852	0.7696	0.5102	0.6831	1.1719	0.9296	0.9003	0.3059	0.5669	0.7741	1.007	0.7074
1611	butyrylcarnitine (C4)	Lipid	Fatty Acid Metabolism (also BCAA Metabolism)	32412	LC/MS Pos Early	100001054	2860	232.154	439829	25576-40-3	C02862	HMDB02013	1.3207	0.9631	0.5272	1.9825	1.3711	0.6346	0.5984	1.3922	0.7438	0.8186	2.3387	1.1122	1.8096	7.4808	2.2111	1.9752	0.7778	1.0239	0.7362	0.9054	0.5167	0.8084	2.5863	0.749	2.0664	0.1108	0.7248	0.9761	0.6814	0.9496	1.1406	1.4539	0.904	1.6884	1.5012	1.2762	0.4896
4759	caffeic acid sulfate	Xenobiotics	Food Component/Plant	53254	LC/MS Polar	100009337	1307	258.992				HMDB41708	0.6003	0.6708	1.1803	0.9967	0.4087	1.3406	1.6172	0.4087	1.2422	0.64	0.4087	0.4087	0.6599	0.4087	0.4087	0.4087	0.4087	0.4087	1.0554	0.6139	0.4087	0.4087	0.6297	0.9181	1.1073	1.6524	1.0455	0.4087	1.0774	1.4883	0.4592	0.5392	0.4087	0.4087	0.4087	1.4105	1.0033
2934	campesterol	Lipid	Sterol	33997	LC/MS Pos Late	100001269	2873	383.367	173183	474-62-4	C01789	HMDB02869	2.1409	3.4154	1.2706	1.8765	1.0062	0.9049	0.701	1.1145	1.4016	1.9622	0.6218	0.264	0.6524	1.1995	0.6336	0.5755	0.6357	1.396	1.1215	1.115	2.1762	1.0942	0.8604	1.7127	1.2055	0.9305	1.8232	2.182	1.6415	0.7073	0.2411	0.4953	0.7669	0.9938	0.4648	0.5451	0.2411
1351	caprate (10:0)	Lipid	Medium Chain Fatty Acid	1642	LC/MS Neg	888	5090.7	171.139	2969	334-48-5	C01571	HMDB00511	1.0523	1.3241	0.7802	1.4089	0.7164	0.6456	0.5455	0.8634	0.525	0.5999	1.3701	0.9049	1.2457	2.9478	1.8379	0.8481	0.9986	0.8332	0.7913	0.9654	0.9133	1.5419	1.0891	1.2163	1.3763	0.9871	1.6596	0.6442	1.1767	1.3912	1.4899	1.0014	1.8082	0.9567	1.3664	1.0703	0.8414
1347	caproate (6:0)	Lipid	Medium Chain Fatty Acid	32489	LC/MS Neg	926	2713.7	115.076	8892	142-62-1	C01585	HMDB00535	1.2508	1.1641	1.1767	1.0485	1.8016	0.6761	0.5596	1.1522	0.6522	0.6076	0.8796	0.9068	0.7627	1.9547	1.0165	3.7596	0.8544	0.7679	0.8013	0.7642	1.1076	2.6016	1.5117	0.8682	1.6912	1.0806	2.6358	0.8238	1.6325	3.6315	2.0861	0.9835	1.1938	0.9674	1.2586	0.8859	0.7162
1349	caprylate (8:0)	Lipid	Medium Chain Fatty Acid	32492	LC/MS Neg	932	4362	143.108	379	124-07-2	C06423	HMDB00482	1.6369	1.2049	1.1973	1.4485	0.6394	0.7647	0.9149	0.9343	1.1723	0.646	1.61	1.0836	1.0216	2.6376	2.1267	0.9705	1.5267	0.9888	0.8664	0.8959	0.7956	1.421	1.3779	0.9938	1.5398	0.9083	1.3718	0.7309	2.2922	0.7093	1.4114	0.974	1.8457	0.7656	1.0062	1.2184	0.6499
56	carboxyethyl-GABA	Amino Acid	Glutamate Metabolism	40007	LC/MS Pos Early	100003260	2085	176.092	2572	4386-03-02		HMDB02201	1.1508	0.6609	0.8165	1.2639	0.5926	1.1068	0.9481	0.5478	0.8689	0.7866	1.4539	0.4737	1.0499	0.5787	1.0136	0.7175	1.4678	1.3162	1.2326	0.8796	0.9864	0.9033	2.1657	0.9571	0.8777	0.9062	1.061	0.7117	1.1376	1.1185	1.5278	1.1619	0.8964	1.3553	0.9246	1.0778	1.0388
1724	carnitine	Lipid	Carnitine Metabolism	15500	LC/MS Pos Early	100000007	1978	162.113	10917	461-05-2	C00318	HMDB00062	1.3018	1.7672	0.6192	1.7298	1.2497	0.8	0.8593	0.9375	0.9981	0.9595	2.3148	2.5665	1.8461	2.8799	1.4976	1.0019	0.877	1.2468	0.9305	0.7367	0.8106	0.9659	1.4295	0.8832	0.9302	0.3403	0.7679	0.8576	0.4941	0.6415	1.2298	1.078	1.5173	1.7196	1.1885	0.7136	1.3105
79	carnosine	Amino Acid	Histidine Metabolism	1768	LC/MS Pos Early	249	2942	227.114	439224	305-84-0	C00386	HMDB00033	0.7207	0.4526	0.2709	0.9484	0.994	2.2381	1.0182	1.9426	0.8667	0.9509	0.7258	0.6091	0.6376	3.9614	0.7052	1.516	1.3483	1.538	0.9489	0.9372	1.0119	1.1532	0.7054	1.0707	0.7746	1.1954	1.5679	2.2297	1.2197	1.8818	0.7589	0.5835	1.2458	0.6257	0.6677	1.3999	1.006
4090	carotene diol (1)	Cofactors and Vitamins	Vitamin A Metabolism	57635	LC/MS Pos Late	100015966	1720	568.428					1.3526	1.9003	0.7834	1.3544	1.3153	0.9245	1.1061	1.1153	1.0918	1.1313	1.0888	0.7653	0.9263	0.8416	0.6252	1.0038	0.9962	1.0977	0.9902	0.9048	1.6371	1.1611	0.9759	1.315	1.2019	1.0861	1.1638	1.064	1.202	1.0812	0.2741	0.9576	0.6529	0.7755	0.4624	0.5572	0.3353
4091	carotene diol (2)	Cofactors and Vitamins	Vitamin A Metabolism	57636	LC/MS Pos Late	100015967	1904	568.428					1.7673	2.9936	0.7469	1.9931	1.7513	0.6609	1.0281	0.9971	1.1586	1.0398	0.9491	0.718	0.8989	3.4985	0.5847	0.8898	1.0734	1.0002	1.1779	0.8569	1.9934	1.5248	0.9998	1.6959	1.3864	1.2019	1.1371	1.2464	1.4827	1.0736	0.2706	0.8986	0.8898	0.6384	0.3778	0.6249	0.209
4092	carotene diol (3)	Cofactors and Vitamins	Vitamin A Metabolism	57637	LC/MS Pos Late	100015968	1948	568.428					1.4709	2.6203	0.7065	1.6159	1.4288	0.7172	1.1535	1.0886	1.2251	1.0858	0.9825	0.709	0.8609	1.041	0.4888	0.8971	0.9687	1.0175	1.1072	0.8329	2.0032	1.2216	0.9072	1.3834	1.1555	1.1349	1.0717	1.1695	1.327	1.0329	0.2229	0.8786	0.7846	0.6808	0.3847	0.5961	0.1968
224	catechol glucuronide	Amino Acid	Tyrosine Metabolism	53243	LC/MS Neg	100009326	1742	285.062	75124209				2.5477	2.2962	8.7547	0.1855	1.1108	1.1816	0.7879	0.1009	0.7714	0.2085	1.1976	0.7787	5.6087	1.6274	0.768	0.1441	0.1554	0.9445	2.0454	1	0.0809	0.4639	5.6134	1.4027	2.4703	0.3952	0.3662	0.3395	1.2822	0.5546	0.7805	1.5223	1.3466	2.4961	3.577	1.6504	0.0809
4145	catechol sulfate	Xenobiotics	Benzoate Metabolism	35320	LC/MS Neg	100001605	1906	188.986	3083879	4918-96-1		HMDB59724	0.3534	1.5182	2.724	1.0427	2.0472	0.9573	1.0802	0.2693	0.9183	0.5646	0.8065	0.2483	1.3616	1.2852	1.2893	0.478	0.4277	1.0711	2.4535	1.3561	0.1143	0.5103	2.0186	0.8501	1.2873	1.3593	0.6148	1.1723	1.2501	0.8499	0.7855	1.7061	1.2254	1.8255	0.7366	2.1443	0.8048
2763	ceramide (d18:1/17:0, d17:1/18:0)*	Lipid	Ceramides	57434	LC/MS Pos Late	100015737	3055	552.535					1.5979	1.1227	0.9344	0.9856	0.7449	0.3389	0.3389	0.3595	1.018	0.4065	0.3389	0.3389	0.3389	4.2925	0.3389	0.3389	1.2957	0.6271	0.3389	0.424	1.778	1.6615	1.0283	1.1922	2.1903	0.8132	0.7915	0.6865	0.7219	0.3389	0.3389	0.624	1.0668	1.3571	1.0144	1.3953	0.3389
2765	ceramide (d18:1/20:0, d16:1/22:0, d20:1/18:0)*	Lipid	Ceramides	57440	LC/MS Pos Late	100015755	3920	594.582					1.1814	1.6545	0.6047	1.9179	1.5744	0.1732	0.1732	0.2225	0.1732	0.1732	0.2091	0.9885	0.8321	2.6139	1.0115	0.1732	0.3199	0.1732	1.066	1.6265	0.1732	1.0725	0.8688	0.83	1.0906	1.3148	0.1732	2.3301	1.7754	0.1732	0.8656	0.9359	0.1732	0.1732	0.3409	1.076	0.1732
241	C-glycosyltryptophan	Amino Acid	Tryptophan Metabolism	48782	LC/MS Pos Early	100006379	2700	367.15	10981970	180509-18-6			0.6136	0.6855	0.7248	0.8909	0.7238	1.074	1.4345	1.5665	1.3737	0.8462	0.929	0.6897	0.9389	0.6428	0.9761	1.4368	2.1131	1.1411	1.4536	1.5097	1.0239	0.5504	0.8783	0.9618	0.7727	1.2543	1.1785	1.3272	1.8228	1.2491	0.8509	0.7949	0.8856	0.9399	0.9183	1.173	1.4782
3141	chenodeoxycholate	Lipid	Primary Bile Acid Metabolism	1563	LC/MS Neg	1123	5264	391.285	10133	474-24-9;474-25-9	C02528	HMDB00518	5.6861	0.9645	0.7726	1.3493	0.9116	0.1569	0.5733	0.0896	0.3419	1.2398	1.0105	1.3744	0.2621	0.419	0.0651	0.4984	1.87	1.579	0.3803	0.0857	0.2724	0.2558	1.649	0.3459	1.4633	0.5233	4.5309	0.3506	1.6594	1.9594	4.2496	3.665	1.6242	1.7884	0.9895	1.3057	5.1745
1969	chiro-inositol	Lipid	Inositol Metabolism	37112	LC/MS Polar	100001859	3191.2	225.062		643-12-9	C19891	HMDB34220	1.1171	0.8264	0.7334	0.7967	0.8026	1.9892	1.0909	1.7806	2.1231	1.6985	1.1694	1.0303	0.2022	0.5663	0.4806	0.721	0.7222	2.5854	0.6444	0.6289	0.7882	0.3754	0.5564	0.5326	0.9697	0.2677	1.0733	0.4895	0.1784	1.5476	4.1908	1.7188	3.7375	6.7141	2.3436	0.6883	2.8195
3138	cholate	Lipid	Primary Bile Acid Metabolism	22842	LC/MS Neg	136	5165	407.28	221493	81-25-4	C00695	HMDB00619	2.0863	0.6849	1.2915	1.4718	0.8248	0.0845	0.2554	0.0845	0.2105	0.3875	1.2758	1.036	0.1127	0.602	0.0845	0.2552	0.754	0.9043	0.4072	0.0845	0.0845	0.0845	1.7493	0.0845	0.964	0.2435	0.3151	1.1872	0.1197	0.9515	6.7005	9.1304	7.2489	2.1529	2.1729	3.1888	10.4931
2906	cholesterol	Lipid	Sterol	63	LC/MS Pos Late	266	2707	369.352	11025495	57-88-5	C00187	HMDB00067	1.3485	1.3623	0.8458	1.2405	0.8523	0.9835	1.0165	1.186	1.5151	1.547	0.8823	0.6878	0.75	0.783	0.8639	1.2221	1.2685	1.3141	1.1857	1.1111	1.2234	1.0439	0.6623	1.0455	0.8677	0.932	1.2777	1.6662	1.5601	1.0958	0.9317	0.9726	0.9299	0.8221	0.9632	1.25	0.6154
1997	choline	Lipid	Phospholipid Metabolism	15506	LC/MS Pos Early	1256	1961	104.107	305	67-48-1	C00114	HMDB00097	1.0161	0.8217	0.9985	0.6743	1.0015	0.8373	0.6268	0.7023	0.6888	0.598	0.628	0.4952	0.514	0.8768	0.5456	0.4893	0.4761	0.4366	0.4625	0.3879	1.1438	1.2555	1.3043	1.2314	1.1199	1.228	1.2147	0.8443	1.2126	1.1947	1.0755	1.1006	0.9564	1.0957	1.2264	1.2545	1.0414
1998	phosphocholine	Lipid	Phospholipid Metabolism	34396	LC/MS Pos Early	267	700	184.073	1014	72556-74-2	C00588	HMDB01565	1.584	2.7128	0.7738	0.9547	0.9578	1.2674	0.8914	0.8898	1.1779	0.757	0.5613	1.3326	0.8386	25.0586	0.6284	0.9546	0.7226	0.8888	0.4264	0.4633	1.6151	0.7843	0.7687	0.9949	0.9139	1.0051	1.391	1.1601	1.5333	1.1501	2.0432	1.2726	1.5086	1.3248	2.5241	1.7332	1.1752
4436	cinnamate	Xenobiotics	Food Component/Plant	12115	LC/MS Neg	1259	2878	147.045	444539	140-10-3	C00423	HMDB00930	1.0746	1.5644	4.896	0.5692	1.4435	1.854	1.1484	0.5641	1.07	0.6054	0.5457	0.3775	2.0425	1.334	0.4951	0.3585	0.1562	0.9928	1.6021	0.1562	0.1562	0.3117	2.419	0.6172	1.5649	0.8596	0.7048	0.1562	1.1123	0.6875	0.1562	0.1562	0.4711	1.6023	1.0876	2.3674	0.7787
1352	cis-4-decenoate (10:1n6)*	Lipid	Medium Chain Fatty Acid	62873	LC/MS Neg	100002796	4890	169.123	5312351	505-90-8			1.4635	0.7822	1.6411	1.9451	2.4264	0.2887	0.2798	1.5324	0.1876	0.1545	0.4509	0.3284	0.7432	1.5983	1.1303	0.8877	0.5312	0.6589	0.401	0.7619	1.3525	2.7644	2.7565	1.4156	3.1338	1.0381	4.9257	0.7497	1.6007	0.9619	1.9209	1.2319	1.8938	0.9317	1.199	0.6232	0.8856
1681	cis-4-decenoylcarnitine (C10:1)	Lipid	Fatty Acid Metabolism (Acyl Carnitine, Monounsaturated)	38178	LC/MS Pos Late	100002259	1057	314.233		98930-66-6			0.5897	0.3449	1.0744	1.8346	2.5596	0.4241	0.5717	1.3376	0.282	0.3797	1.665	1.0763	1.1192	1.814	1.83	1.3132	1.4922	1.256	0.6587	1.2147	0.7186	1.4425	1.5403	1.4193	2.4853	0.5925	1.1154	1.1389	0.6874	0.7337	0.8875	0.8212	1.1374	0.6045	0.6444	0.7222	0.5704
1302	citrate	Energy	TCA Cycle	1564	LC/MS Neg	1124	582	191.02	311	77-92-9	C00158	HMDB00094	1.0119	0.8971	0.9349	1.0423	1.1707	1.097	0.8785	1.3149	1.1927	0.7673	0.6916	0.8551	0.995	1.0985	0.8544	1.2565	1.133	1.005	1.0079	0.9689	0.8843	1.3216	1.4308	0.7057	1.2492	1.2278	1.0923	1.1149	0.9027	0.9051	0.9326	0.8857	0.7635	1.1818	0.93	0.9625	0.8594
433	citrulline	Amino Acid	Urea cycle; Arginine and Proline Metabolism	2132	LC/MS Pos Early	391	1520	176.103	9750	372-75-8	C00327	HMDB00904	1.1158	0.7784	1.3172	0.8867	0.7427	1.1343	1.4243	1.0153	0.9356	0.9471	1.3958	1.0783	1.1466	1.145	0.7307	1.1242	0.9305	1.5887	0.7812	0.8513	0.8415	0.7813	0.9409	0.8775	0.721	0.7256	0.6675	0.8518	0.9066	0.9847	2.1065	0.9195	1.6362	2.1179	1.6631	1.3708	2.0151
3007	corticosterone	Lipid	Corticosteroids	5983	LC/MS Neg	272	5040	345.207	5753	50-22-6	C02140	HMDB01547	2.1987	0.258	0.5498	0.4354	0.258	0.8405	1.0544	0.593	1.4233	0.258	1.7771	0.9456	5.5764	0.258	2.7771	1.1868	6.4308	4.087	0.6301	1.4157	0.258	0.258	2.1279	0.7345	2.112	0.258	0.3768	0.4565	0.3807	0.258	0.258	0.3098	0.8566	1.3027	3.3749	0.258	0.258
467	creatine	Amino Acid	Creatine Metabolism	27718	LC/MS Pos Early	1221	1947	132.077	586	57-00-1	C00300	HMDB00064	1.4067	0.871	0.7095	0.8417	0.9852	0.8492	0.7255	1.061	0.7288	0.8248	2.0963	1.533	1.0243	2.5522	2.3495	0.9195	1.1377	1.7728	0.6417	0.4642	0.6566	1.2619	1.458	1.149	1.2191	0.665	0.8899	0.7054	0.8684	1.0458	2.1939	1.0148	0.981	1.1173	1.3637	0.9187	1.0582
468	creatinine	Amino Acid	Creatine Metabolism	513	LC/MS Pos Early	275	2055	114.066	588	60-27-5	C00791	HMDB00562	1.0245	1.0522	0.9915	1.0241	0.8441	1.0493	0.9406	1.05	1.0745	0.919	1.1171	0.9436	0.8837	1.3393	1.1512	0.9321	0.9833	1.1305	1.0386	0.811	0.8654	1.0458	1.2739	1.0018	1.1548	0.8785	1.0422	0.9035	0.9647	1.0387	1.3999	0.9037	0.9006	0.9982	1.1419	0.9596	0.9427
399	cystathionine	Amino Acid	Methionine, Cysteine, SAM and Taurine Metabolism	15705	LC/MS Pos Early	310	2270	223.075	439258	535-34-2	C02291	HMDB00099	0.7677	0.7384	0.6869	1.0767	0.8425	1.3282	1.0553	0.9938	1.5179	1.2255	0.693	0.527	1.0062	0.4448	0.4391	1.6416	1.3737	1.1497	1.1295	1.8363	0.4528	0.5359	0.5741	0.7012	0.4927	1.1124	1.5286	1.7477	1.6449	1.013	0.606	0.7431	0.546	0.5916	0.5409	0.8811	1.1563
401	cysteine	Amino Acid	Methionine, Cysteine, SAM and Taurine Metabolism	1868	LC/MS Pos Early	800	1475	122.027	5862	52-90-4;56-89-3	C00097	HMDB00574	0.7175	0.7444	0.9899	1.0181	0.7545	0.9255	0.7956	1.066	1.0101	0.9215	0.5393	0.4815	0.8897	1.7411	0.8877	1.2126	1.6627	1.068	0.9829	1.3479	0.6227	0.7196	1.069	1.2362	0.7985	1.2982	1.3889	2.1996	1.5752	1.2147	1.0534	0.9017	0.68	0.8599	0.7272	1.2822	0.9845
406	cysteine s-sulfate	Amino Acid	Methionine, Cysteine, SAM and Taurine Metabolism	22176	LC/MS Polar	100000808	2273	199.969	115015	1637-71-4	C05824	HMDB00731	1.7876	1.2515	2.2477	2.2053	0.5468	2.5856	3.3145	2.486	3.4053	2.26	0.4257	0.9187	1.5711	0.297	0.7988	0.9694	3.2996	1.143	1.4019	1.4398	0.9111	1.6215	1.0306	0.9524	0.7636	1.0842	1.1523	2.3267	0.8885	0.6381	1.2832	0.7039	0.7927	0.6314	0.8186	0.6188	0.2982
506	cysteine-glutathione disulfide	Amino Acid	Glutathione Metabolism	35159	LC/MS Pos Early	100001437	2465	427.095	4247235	13081-14-6		HMDB00656	1.2145	0.7459	0.577	1.4536	0.9511	0.9886	1.0606	0.7324	0.9682	0.8676	1.1504	1.0675	1.007	2.3294	0.8484	1.4361	1.1346	0.9842	0.8015	0.7388	0.6607	0.7656	1.1126	1.0018	0.5904	1.1933	1.1491	0.9669	1.2301	1.5171	0.8777	1.2805	1.2248	0.8942	0.7963	0.9982	0.9972
510	cysteinylglycine disulfide*	Amino Acid	Glutathione Metabolism	62103	LC/MS Pos Early	100002466	2547	298.053		70555-24-7		HMDB00709	2.2137	1.2586	1.7678	2.223	1.7599	0.7752	2.0686	1.3384	0.5286	0.9973	0.7726	0.6176	1.4137	1.9548	1.0027	1.2301	0.5314	0.2834	1.5687	1.1	1.5583	1.1597	0.7654	1.6306	0.6432	1.2381	0.2956	1.2136	0.5792	0.7937	0.4672	1.1869	1.4388	0.7965	0.2578	0.3447	0.8543
407	cystine	Amino Acid	Methionine, Cysteine, SAM and Taurine Metabolism	56	LC/MS Pos Early	279	2000	241.031	67678	56-89-3	C00491	HMDB00192	1.2355	1.5302	0.5323	1.2663	2.1349	0.8715	1.3218	0.8868	1.3907	1.0035	0.7444	0.7026	0.6109	0.2159	1.011	1.108	2.0151	0.7533	0.9965	1.126	1.0894	0.5878	1.3507	1.6935	0.9501	0.963	0.8683	1.824	0.9155	0.9904	1.6798	1.4421	0.9195	0.6075	0.9653	1.2643	0.8329
3923	cytidine	Nucleotide	Pyrimidine Metabolism, Cytidine containing	514	LC/MS Pos Early	827	2124	244.093	6175	65-46-3	C00475	HMDB00089	0.7055	0.1858	1.0355	0.7561	1.431	0.4619	0.3822	0.9043	0.3695	0.5504	0.6319	0.297	0.2115	1.0346	0.5699	0.657	0.907	0.4641	0.6522	0.6422	1.3391	1.4293	2.3136	1.7732	1.4984	2.2367	1.8026	1.8006	1.626	1.7388	1.0513	1.1728	0.6394	0.9654	1.0371	1.066	1.4116
3924	cytosine	Nucleotide	Pyrimidine Metabolism, Cytidine containing	573	LC/MS Pos Early	881	2060	112.05	597	71-30-7	C00380	HMDB00630	0.879	0.9796	3.1965	0.653	0.7667	0.795	0.9037	0.3006	1.2061	0.5969	0.6688	1.6874	0.9769	0.5479	0.8466	0.9604	1.0883	0.7865	1.0134	1.1108	0.7874	1.0179	1.1292	1.0154	1.3706	2.1467	0.9603	1.4152	1.7348	1.0537	0.8138	1.4942	0.664	0.9759	0.9866	2.078	3.1405
4454	daidzein	Xenobiotics	Food Component/Plant	32453	LC/MS Neg	100001219	3566	253.051	5281708	486-66-8	C10208	HMDB03312	7.1524	3.5638	1.1208	0.429	0.9713	1.0364	1.2257	0.2624	3.2849	0.603	0.2825	0.3583	4.667	0.6336	0.5012	0.1596	0.6557	0.2478	1.0817	0.7179	1.0287	2.7064	1.6326	1.2875	2.4565	0.7258	0.5005	0.2409	0.5759	1.1043	3.1059	2.397	1.8886	2.7429	1.7611	0.5091	0.7376
4455	daidzein 7-O-glucuronide	Xenobiotics	Food Component/Plant	62070	LC/MS Neg	100020206	2580	429.083	11316354			HMDB41718	2.6131	2.2706	1.27	0.7585	1.0208	1.4345	1.37	0.3948	2.4892	0.942	0.4473	1.1205	1.7942	0.374	0.6014	0.558	0.5536	0.7327	1.1909	0.5667	0.9375	1.0195	1.8265	1.1788	1.5106	0.8098	0.5155	0.8917	0.545	0.7855	2.7961	2.0862	1.1	1.0359	1.7533	0.5296	0.9805
4688	daidzein sulfate (1)	Xenobiotics	Food Component/Plant	48727	LC/MS Neg	100006362	2843	333.007	12114465				1.6794	0.9417	1.5382	1.0198	1.0833	2.6175	1.6969	0.522	2.4351	0.7907	0.307	0.6107	1.228	0.1361	0.7993	0.5828	0.4047	1.1614	1.8182	0.5773	0.7715	0.7813	1.1762	1.9053	2.0224	1.1014	0.7336	0.4393	0.8095	0.8541	2.7252	2.3579	1.1084	0.9018	0.9612	0.984	0.7905
4683	daidzein sulfate (2)	Xenobiotics	Food Component/Plant	48728	LC/MS Neg	100006363	3330	333.008	12114465				1.6953	0.855	1.6073	1.1767	1.3025	2.5903	2.2623	0.5595	2.9953	1.1252	0.2518	0.4208	1.1748	0.1386	0.7259	0.6113	0.4403	1.0327	1.7609	0.7476	0.6684	0.778	0.8231	1.399	1.6622	1.2024	0.7997	0.4704	0.9085	1.0955	2.5807	2.1547	0.7585	0.7423	0.9673	1.0913	0.82
1723	deoxycarnitine	Lipid	Carnitine Metabolism	36747	LC/MS Pos Early	100001662	2052	146.118	134	6249-56-5	C01181	HMDB01161	1.2867	1.7586	0.4988	1.5169	1.0394	1.0966	0.7896	1.1673	0.9805	1.0029	1.401	1.8821	1.505	4.5459	1.2876	0.8443	0.7476	0.8056	0.9423	0.5905	0.9255	1.3243	1.4972	1.4309	1.2452	0.6843	0.7768	0.7269	0.5506	0.8286	1.3305	0.9971	1.9619	1.9814	1.1185	0.7678	0.7185
2905	desmosterol	Lipid	Sterol	6065	LC/MS Pos Late	306	2364	367.336	439577	313-04-2	C01802	HMDB02719	2.5915	2.0539	0.3322	3.1729	0.7293	0.7438	1.6591	0.9089	3.0812	1.8711	0.9362	0.6399	0.7642	0.9689	0.7731	0.7239	1.1765	0.9269	1.1391	0.7842	2.037	2.2505	1.2401	1.337	0.7024	1.4338	2.1775	1.1872	1.8761	1.0074	0.9926	0.9865	1.4351	1.1147	1.6805	0.7092	0.479
5343	diethanolamine	Xenobiotics	Chemical	20691	LC/MS Pos Early	100000837	1960	106.086	8113	111-42-2	C06772	HMDB04437	0.7287	1.1085	1.873	1.0639	1.4805	245.246	1.4986	0.889	1.7525	0.7524	0.5116	0.6856	1	2.4905	0.5116	1.378	1.2497	0.736	1.8188	1.4549	1.0457	0.5116	1.0175	0.7983	0.8205	1.0496	0.895	5.1343	0.751	0.9212	0.6316	0.8554	0.9089	0.8307	0.8138	0.788	0.9455
1416	dihomolinoleate (20:2n6)	Lipid	Long Chain Polyunsaturated Fatty Acid (n3 and n6)	17805	LC/MS Neg	1231	5730	307.264	6439848	2091-39-6	C16525	HMDB05060	1.0663	0.9348	1.5482	0.8978	1.4565	0.9184	0.9121	1.2378	0.7137	0.8666	0.5761	0.6159	0.757	0.6879	0.9638	1.1116	1.5397	1.0812	0.7698	1.0608	1.3566	1.4029	1.8851	1.2397	1.1535	1.2422	1.8707	1.1665	1.3059	1.5049	0.9123	0.8782	1.1936	0.9856	0.9979	0.6627	0.743
1418	dihomolinolenate (20:3n3 or 3n6)	Lipid	Long Chain Polyunsaturated Fatty Acid (n3 and n6)	35718	LC/MS Neg	100001739	5596	305.249	5280581	17046-59-2	C03242	HMDB02925	1.169	0.9474	0.6503	0.9876	1.0023	0.6604	0.567	1.0976	0.7342	0.9829	0.3218	0.4376	0.4129	0.41	0.5766	1.1518	1.9936	1.3824	0.9869	1.1663	1.7027	1.7212	1.2354	1.0882	0.9172	1.5577	2.6814	1.3967	2.2856	2.3223	0.9977	0.9742	1.3469	1.1597	1.4748	0.7757	0.4993
4462	dihydroferulate	Xenobiotics	Food Component/Plant	40481	LC/MS Neg	100003432	1928	195.066	14340	1135-23-5			1.121	0.4937	2.1117	0.2168	0.2168	0.4888	0.2168	0.2168	0.8062	0.2168	0.2168	0.2168	0.5527	0.2168	0.2168	0.2168	0.2168	1.2805	0.2168	0.2168	0.599	0.2168	0.7617	0.2168	0.2168	1.4779	0.2168	0.2168	0.9787	0.2168	1.0213	0.8907	2.0088	1.8261	0.8934	1.9352	1.3868
4463	dihydroferulic acid sulfate	Xenobiotics	Food Component/Plant	62857	LC/MS Neg	100020272	1310	275.023	187489			HMDB41724	0.3393	0.3393	2.3968	0.3393	0.3393	1.007	0.3393	0.3393	0.3393	0.3393	0.3393	0.3393	0.3393	0.3393	0.3393	0.3393	0.3393	0.8672	0.3393	0.3393	0.3393	0.3393	0.3393	0.3393	0.3393	1.3431	0.3393	0.3393	0.3393	0.3393	0.3393	0.3393	0.5666	1.2092	0.3393	3.9047	0.993
3879	dihydroorotate	Nucleotide	Pyrimidine Metabolism, Orotate containing	601	LC/MS Polar	923	1910	157.025	648	155-54-4	C00337	HMDB03349	0.7808	1.655	0.1749	0.9322	1.3164	0.751	2.584	0.1749	1.9683	2.1428	1.0068	2.485	2.5516	0.3536	1	1.6	1.1901	2.6087	2.1993	1.9366	2.4302	1.1041	0.5358	1.1703	0.7218	0.4286	0.3311	7.1417	0.8436	0.4801	0.4539	7.5236	1.2707	0.5121	0.7682	0.4973	0.6485
5432	dimethyl sulfone	Xenobiotics	Chemical	43424	LC/MS Pos Early	100004284	832	95.0161	6213	67-71-0	C11142	HMDB04983	0.9104	1.5527	4.7407	1.6431	1.0652	0.9965	0.7519	1.0955	0.9127	0.6699	1.8932	1.3901	1.8428	0.9635	1.6123	0.5187	0.1384	1.0314	0.3074	0.2329	3.7015	0.873	2.1549	2.1943	1.2301	1.7109	0.7177	1.0251	0.4757	1.0035	0.9581	4.7489	2.5087	3.1628	0.5684	0.662	0.5039
439	dimethylarginine (ADMA + SDMA)	Amino Acid	Urea cycle; Arginine and Proline Metabolism	36808	LC/MS Pos Early	100001810	2850	203.15	123831	102783-24-4	C03626	HMDB01539	0.8512	0.7439	0.7637	0.752	0.9347	1.0175	1.3013	1.0579	1.1819	0.9491	0.7758	0.7016	0.8081	0.6549	0.813	1.2059	1.4978	1.1331	1.2291	1.4238	1.0843	0.9769	1.1414	0.9748	0.9825	1.4243	1.4011	1.3688	1.3156	1.3139	0.9684	0.9377	0.846	0.9175	0.9782	1.2046	1.1511
5	dimethylglycine	Amino Acid	Glycine, Serine and Threonine Metabolism	5086	LC/MS Pos Early	806	1104	104.071	673	1118-68-9	C01026	HMDB00092	1.6335	0.8217	1.3454	1.0103	0.8352	1.0051	1.444	1.0524	1.6649	1.1706	1.2904	0.7782	1.1916	1.5434	0.9692	1.0334	0.7245	0.9461	0.9949	0.7648	0.878	0.981	1.7351	0.9613	1.058	1.0299	0.8353	0.8537	1.0128	0.8326	1.4451	0.7867	0.8369	0.7932	0.9843	1.1878	1.3558
1500	dimethylmalonic acid	Lipid	Fatty Acid, Dicarboxylate	42978	LC/MS Polar	100004251	2702	131.035	11686	595-46-0		HMDB02001	0.8805	0.6581	0.7576	0.6104	0.5135	0.6741	0.5135	0.6713	1.1888	0.8829	0.5135	0.5135	0.5135	0.5135	0.5135	0.7642	1.0517	1.0858	0.6487	1.0818	0.5135	1.2259	1.4855	0.586	0.9757	0.9649	1.486	1.5429	1.3614	1.5495	0.9261	0.5706	1.0368	1.0335	1	1.3185	1.006
1423	docosadienoate (22:2n6)	Lipid	Long Chain Polyunsaturated Fatty Acid (n3 and n6)	32415	LC/MS Neg	100001182	6034	335.296	5282807	7370-49-2	C16533	HMDB61714	0.6849	0.7998	1.1037	0.8052	1.2155	0.5688	0.6692	1.4055	0.6759	0.7769	0.464	0.5596	0.6277	0.7818	0.8215	1.3363	2.4562	1.5745	0.9446	1.359	1.1965	1.0516	1.7613	1.013	0.9814	1.1303	2.0729	1.4933	1.5923	1.6138	0.987	0.947	1.1688	1.1774	1.2341	0.7348	0.6734
1547	docosadioate (C22-DC)	Lipid	Fatty Acid, Dicarboxylate	39837	LC/MS Neg	100002952	5291.8	369.301	244872	505-56-6	C19625		1.6527	2.1024	2.9696	1.5471	2.4151	0.939	0.7069	0.3956	0.6622	0.3213	0.1378	0.1378	1.0788	0.9962	0.2992	0.6077	1.5738	0.8025	0.8569	0.7024	3.334	2.1593	1.4399	11.9221	1.5888	0.9386	1.4441	0.3649	1.7224	1.9634	0.3804	1.0038	3.6702	3.2804	1.0228	0.9603	0.1378
1409	docosahexaenoate (DHA; 22:6n3)	Lipid	Long Chain Polyunsaturated Fatty Acid (n3 and n6)	44675	LC/MS Neg	100000665	5525	327.233	445580	6217-54-5	C06429	HMDB02183	2.0635	0.6827	1.1	1.2568	2.6227	0.6679	0.9985	1.9516	0.7166	0.8517	0.6069	0.656	0.5599	0.5726	1.0781	1.3212	1.3384	1.0054	0.5339	0.9289	3.5982	2.5803	1.3873	2.8934	2.4953	0.992	1.1938	1.1294	0.7264	0.9466	1.3749	1.652	1.4295	1.0015	0.8837	0.6493	0.4896
1408	docosapentaenoate (DPA; 22:5n3)	Lipid	Long Chain Polyunsaturated Fatty Acid (n3 and n6)	32504	LC/MS Neg	100001181	5571	329.249	6441454	2234-74-4	C16513	HMDB06528	1.1548	0.6641	0.9455	0.8438	1.3584	0.5883	0.7164	2.1062	0.5963	0.9028	0.3392	0.5637	0.4881	0.6382	0.7593	2.1501	2.426	1.6591	1.0214	2.3931	2.0484	2.4291	0.9786	1.5496	1.5949	1.4764	1.9562	2.0313	1.3879	1.9345	0.9177	0.9136	1.0606	1.1604	0.8681	1.2141	0.8117
1422	docosapentaenoate (n6 DPA; 22:5n6)	Lipid	Long Chain Polyunsaturated Fatty Acid (n3 and n6)	37478	LC/MS Neg	100001580	5624.5	329.249	6441454	25182-74-5	C16513	HMDB01976	1.2556	0.7502	0.8435	0.9988	2.494	0.6976	0.8177	1.2122	0.7144	0.72	0.4887	0.5314	0.3075	0.5555	0.4423	1.8133	1.6515	1.0012	0.5322	1.1806	2.0013	1.5679	1.2435	1.5959	1.0022	1.6213	1.7178	1.3474	0.9794	1.5414	1.1571	1.6327	1.2093	0.7843	1.0669	0.622	0.3108
1410	docosatrienoate (22:3n3)	Lipid	Long Chain Polyunsaturated Fatty Acid (n3 and n6)	32417	LC/MS Neg	100001195	5823	333.28	5312556	59708-86-0	C16534	HMDB02823	1.0082	0.8012	0.6186	0.9918	1.2706	0.6056	0.6305	1.2309	0.8807	1.1143	0.3124	0.4917	0.4457	0.6709	0.3874	1.8277	2.4795	1.9148	1.3018	1.821	1.4201	1.4791	1.331	0.8083	0.6965	1.1379	3.9384	2.0707	1.6416	3.2255	0.7542	0.8858	1.1191	1.0766	1.7247	0.7405	0.5966
1532	dodecadienoate (12:2)*	Lipid	Fatty Acid, Dicarboxylate	62276	LC/MS Neg	100020478	5146	195.139					1.5154	0.9424	0.9878	1.011	1.325	0.9573	0.9969	1.2916	1.2585	0.7262	1.2866	0.9686	1.0541	1.7992	1.3898	1.3006	1.3268	0.8503	0.5002	1.2727	0.8619	0.8447	1.0116	1.0616	1.2487	0.8749	1.4164	1.0861	0.7823	1.0031	1.0923	0.7794	1.0339	0.99	0.788	0.9935	0.5145
1529	dodecanedioate (C12)	Lipid	Fatty Acid, Dicarboxylate	32388	LC/MS Neg	100001102	2990	229.144	12736	693-23-2	C02678	HMDB00623	0.6719	0.6719	0.6719	0.6719	0.6719	0.6719	1.1271	2.5989	0.6719	0.6719	0.6943	0.6719	0.6719	0.6719	0.7542	2.5685	5.2135	1.2708	1.0061	2.2077	0.6719	0.9634	0.7442	1.2538	0.6719	0.6719	0.8063	0.6719	0.6719	1.1526	0.8306	0.6719	0.6719	0.9939	0.6719	0.6864	0.6719
5434	ectoine	Xenobiotics	Chemical	35651	LC/MS Pos Early	100001635	1980	143.082	126041	96702-03-3	C06231		1.2508	1.0161	1.0098	1.0355	0.8659	0.6486	1.7703	0.5213	1.9013	0.9444	0.431	0.4215	1.0919	0.5065	0.7049	1.332	1.1824	0.7167	1.6883	1.1532	0.9021	0.8027	1.721	0.9481	1.5809	0.8609	0.8891	0.9293	0.8112	1.1306	1.5306	0.9084	1.0678	1.2041	0.9764	1.5089	1.9725
1545	eicosanedioate (C20-DC)	Lipid	Fatty Acid, Dicarboxylate	39831	LC/MS Neg	100002951	5200.9	341.27	75502	2424-92-2			1.3404	2.0444	2.9684	1.4422	2.142	1.1202	0.8483	0.5398	0.5501	0.4027	0.1254	0.1762	1.0243	0.7496	0.3805	0.7852	4.2213	0.8979	0.9757	0.9703	3.3001	1.7731	1.441	8.3883	1.3996	0.7911	1.3068	0.3566	1.7371	1.6346	0.504	0.87	2.6263	2.5378	1.2957	1.2475	0.1398
1406	eicosapentaenoate (EPA; 20:5n3)	Lipid	Long Chain Polyunsaturated Fatty Acid (n3 and n6)	18467	LC/MS Neg	2050	5450	301.217	446284	10-2005-9;10417-94-4	C06428	HMDB01999	0.8436	0.813	0.529	0.6613	0.8893	0.5334	0.5853	1.612	0.8048	0.8892	0.257	0.3881	0.3654	0.469	0.7043	1.8319	2.8074	1.6602	1.0666	2.0121	1.4441	1.4702	0.8062	0.9787	1.032	1.2325	1.6441	2.0558	2.0911	1.6275	0.8516	1.0269	1.2568	1.1573	1.0213	1.2305	0.5566
1389	eicosenoate (20:1n9 or 1n11)	Lipid	Long Chain Monounsaturated Fatty Acid	33587	LC/MS Neg	100001335	5950	309.28	5282768		C16526	HMDB02231	1.0134	0.7971	0.787	0.8071	1.0038	0.5562	0.4453	1.2234	0.8517	0.9794	0.4161	0.401	0.5914	0.7524	0.827	1.4593	2.1859	1.2372	1.162	1.1337	2.3184	2.5431	1.3585	1.2388	0.9962	1.9503	3.2993	1.0684	2.6402	2.6811	0.5878	0.9247	2.1518	1.4171	1.865	0.608	0.4126
4474	equol glucuronide	Xenobiotics	Food Component/Plant	41948	LC/MS Neg	100003895	3215	417.119					1.6505	1.3229	6.2057	0.0649	1.3592	1.5324	2.7745	1.3579	1.3921	0.4879	0.2556	0.0725	1.5159	1.0176	1.5095	0.0649	0.1576	0.6639	2.2517	0.672	0.0649	0.1097	3.7026	0.3398	1.4932	0.4359	0.1473	0.5974	0.9824	0.2244	1.1817	4.3981	0.417	2.2969	2.0578	1.3391	0.1221
4475	equol sulfate	Xenobiotics	Food Component/Plant	40478	LC/MS Neg	100003429	3630	321.044					1.2186	1.1995	3.7287	0.4447	1.8959	1.8348	2.0172	1.5584	1.5679	0.8519	0.4706	0.1873	1.7531	0.739	1.3612	0.1749	0.2946	0.8645	2.3201	0.8337	0.058	0.332	2.1581	0.5605	1.5713	1.2638	0.49	0.6861	1.6966	0.7491	1.4252	3.0614	0.9005	1.4547	0.8319	2.477	0.4874
4476	ergothioneine	Xenobiotics	Food Component/Plant	37459	LC/MS Pos Early	100002154	850	230.096	3032311	58511-63-0	C05570	HMDB03045	1.3058	1.0115	1.2556	0.8576	1.2179	0.8509	1.2257	0.872	0.974	0.904	1.259	0.8606	1.1778	2.0761	1.2561	0.7165	0.7128	0.7753	0.6931	0.5845	1.5077	1.4942	1.1298	1.7993	1.3039	1.3095	0.9385	1.1583	1.0849	1.1907	0.5472	0.9814	1.3847	0.887	0.7436	0.8799	0.9745
1393	erucate (22:1n9)	Lipid	Long Chain Monounsaturated Fatty Acid	1552	LC/MS Neg	1087	6355.6	337.311	5281116	112-86-7	C08316	HMDB02068	0.8866	1.0118	0.9809	0.9147	1.1773	0.3706	0.6851	1.297	0.7873	0.9307	0.564	0.5528	0.7248	1.0387	0.7785	1.6273	2.2338	1.508	1.0704	1.3805	1.537	1.5373	1.5256	0.9882	0.5484	1.3336	2.2813	1.5165	1.9801	2.1249	0.6415	0.827	1.2479	1.0686	1.5671	0.6519	0.5519
4478	erythritol	Xenobiotics	Food Component/Plant	20699	LC/MS Polar	100000846	1491	167.056	222285	149-32-6	C00503	HMDB02994	0.9996	1.5291	1.753	1.0004	0.8693	0.8553	0.8315	0.4649	0.9509	0.7263	0.6423	0.7056	0.8376	0.9451	0.5252	0.7987	0.8098	1.231	1.1471	1.0037	0.9278	0.9645	1.5594	0.7556	1.5809	0.922	1.3366	0.8906	1.3586	1.111	1.351	0.9282	1.3628	2.0918	2.2667	1.634	1.5323
1294	erythronate*	Carbohydrate	Aminosugar Metabolism	42420	LC/MS Polar	100001320	2186	135.03	2781043	88759-55-1		HMDB00613	0.9313	1.0047	0.7477	0.9874	0.936	1.094	1.1868	0.9933	1.3373	0.999	0.6813	0.6907	0.904	0.6733	0.7564	0.9721	1.1499	1.0123	1.3259	1.085	1.0015	0.9575	1.039	0.784	0.8903	0.9839	1.2633	1.3881	1.3101	1.3673	0.9175	0.7831	0.7781	0.9455	1.001	1.3633	1.227
4652	ethyl alpha-glucopyranoside	Xenobiotics	Food Component/Plant	63152	LC/MS Neg	100015965	1576	207.087	428040	34625-23-5			0.8879	0.4036	1.0569	0.7758	0.8451	0.1786	0.1786	0.1786	0.1786	0.1786	0.3904	0.3734	0.9974	0.4854	0.6181	0.9909	1.2263	1.1405	1.5216	1.2258	0.7658	0.7609	0.9134	1.0633	1.252	1.129	1.3871	1.1791	1.4669	1.2793	0.8583	0.784	0.8063	1.0897	0.7668	1.3873	1.1527
356	ethylmalonate	Amino Acid	Leucine, Isoleucine and Valine Metabolism	15765	LC/MS Polar	2054	2785	131.035	11756	601-75-2		HMDB00622	0.6822	1.1112	1.7719	1.1784	0.813	0.8215	0.9882	2.204	0.6937	0.8057	1.0118	0.6588	1.4764	1.4714	0.8805	2.1866	1.55	1.0766	1.3421	1.2837	0.5924	0.6225	1.4379	0.5974	1.1523	0.7237	0.9346	0.9673	1.0162	0.9617	0.6586	1.052	0.6371	1.02	0.9544	1.0517	0.7781
4484	ferulic acid 4-sulfate	Xenobiotics	Food Component/Plant	47114	LC/MS Neg	100005389	1200	273.007	6305574	86321-29-1		HMDB29200	0.627	1.6256	2.124	0.6289	0.9873	2.8058	2.194	0.2245	2.2408	1.0127	0.5489	0.1797	0.6532	0.2214	0.1956	0.5144	0.1897	0.4223	1.6902	0.4539	1.1359	1.0668	1.2259	1.7894	1.8551	2.9526	2.0536	0.2675	2.3761	1.9433	0.6028	1.2791	0.8573	0.8335	0.4248	2.4979	1.0477
77	formiminoglutamate	Amino Acid	Histidine Metabolism	43493	LC/MS Pos Early	100002500	1880	175.071	439233	816-90-0	C00439	HMDB00854	0.5603	1.0465	0.3029	1.7268	0.6346	0.4289	0.26	1.8124	0.3393	0.8653	1.7946	1.9285	4.2025	4.0257	1.7414	1.8799	10.3043	2.9446	0.5179	3.7792	0.8365	0.6504	1.2617	1.1434	0.8882	0.207	1.6285	3.8059	0.5978	0.5044	0.8973	0.8864	0.9535	1.1857	2.047	4.285	1.1834
1213	fructose	Carbohydrate	Fructose, Mannose and Galactose Metabolism	48195	LC/MS Polar	878	2065	225.062	5984	57-48-7	C00095	HMDB00660	1.0917	1.3715	1.8717	0.8548	1.9861	0.7378	1.4764	1.3328	1.2232	0.9318	0.7127	0.5902	1.52	0.417	0.4394	0.8048	0.3147	0.7889	1.8104	0.6133	0.8486	0.7474	1.2902	1.0452	1.0417	0.8664	0.86	0.6519	0.887	1	1.0842	1.308	0.814	1.4486	1	1.15	1.7864
113	fructosyllysine	Amino Acid	Lysine Metabolism	46227	LC/MS Pos Early	100005373	2784	309.166	123708	21291-40-7			1.0625	0.5793	0.9745	0.9988	1.0224	1.1702	1.0099	0.6796	0.8964	1.1226	1.6059	1.4825	1.3734	1.653	1.2541	0.7187	0.5201	0.9621	0.5241	0.8903	1.0012	1.0724	1.3362	1.2991	1.2115	0.7816	0.9336	0.8322	0.5817	1.0249	0.9194	0.8258	0.9122	0.994	1.0247	1.1477	1.0147
1312	fumarate	Energy	TCA Cycle	1643	LC/MS Polar	330	3084	115.004	444972	100-17-8	C00122	HMDB00134	0.8399	0.4319	0.4862	1.0154	0.6079	1.1127	0.6029	0.7509	0.624	0.5157	0.6657	0.6495	0.9955	0.5974	0.8952	0.718	1.2289	0.8807	0.6104	0.6182	1.4077	1.1098	1.5049	1.2484	1.3457	1.4328	1.0647	1.079	1.5241	1.3901	1.0045	1.1096	0.9143	0.8209	1.1589	1.272	1.2022
4719	furaneol sulfate	Xenobiotics	Food Component/Plant	54795	LC/MS Neg	100009328	1900	206.997					0.7493	0.5787	1.2426	0.5965	0.6509	0.9153	1	0.1906	0.8887	0.1906	0.6873	0.2117	0.388	0.9702	0.6236	0.6499	0.3272	0.6154	1.3753	0.5023	0.8111	0.8497	1.7215	1.2478	2.1161	2.3901	1.3006	0.478	2.0183	1.9658	1.6921	1.9012	1.069	1.3855	1.0639	2.4307	2.8591
1239	galactonate	Carbohydrate	Fructose, Mannose and Galactose Metabolism	27719	LC/MS Polar	100001026	3085	195.051	128869	299-28-5	C00880	HMDB00565	2.9574	2.2022	1.4365	1.2259	0.7709	0.9383	0.8402	0.4562	1.1043	0.7201	0.6222	0.8388	0.4974	0.5878	0.66	0.6491	0.7578	1.4036	0.5686	0.6243	0.969	0.8736	1.5639	0.7788	1.1764	0.9793	1.0207	1.3388	1.2065	1.1589	1.9533	0.8779	1.3499	1.8489	1.953	1.4578	1.3871
4031	gamma-CEHC	Cofactors and Vitamins	Tocopherol Metabolism	44876	LC/MS Neg	100002094	3843	263.129	133098	178167-75-4		HMDB01931	2.9872	4.209	8.9051	0.7641	1.7154	0.7875	1.3329	0.4757	0.7736	0.3263	0.3263	0.3263	1.0738	0.53	0.3263	0.3263	0.3263	0.3263	1.2598	0.3263	0.3263	0.3263	2.2998	0.6263	2.1535	1.0118	0.3497	0.3263	1.303	0.4197	0.3263	1.059	0.3263	0.9882	0.7468	0.419	0.3263
579	gamma-glutamyl-2-aminobutyrate	Peptide	Gamma-glutamyl Amino Acid	37092	LC/MS Pos Early	100001502	2380	233.113		16869-42-4			1.0376	0.9052	1.1134	1.0122	0.4848	1.2904	0.9992	1.4707	0.8173	0.6904	2.4478	2.1833	1.1903	1.8927	1.7819	1.4235	1.4872	1.5377	0.8393	1.2481	0.6671	0.6465	0.4038	0.5124	0.4698	0.6904	0.6571	0.9866	0.713	0.4635	2.4237	0.5427	1.3988	1.724	1.7864	0.4415	1.0008
561	gamma-glutamylalanine	Peptide	Gamma-glutamyl Amino Acid	37063	LC/MS Pos Early	100001843	1986	219.098	440103	5875-41-2		HMDB29142	0.8529	1.1734	0.5373	0.8692	0.5169	1.0597	1.586	1.002	1.1864	1.0135	0.954	0.5808	1.2819	0.8588	0.849	1.1238	1.0836	1.0352	1.394	1.3131	1.0615	1.0653	0.6582	0.7279	0.5999	1.3538	1.1184	1.0669	1.3071	0.9718	0.4911	0.9483	0.998	1.0573	0.7894	0.532	0.7453
569	gamma-glutamyl-alpha-lysine	Peptide	Gamma-glutamyl Amino Acid	55015	LC/MS Pos Early	100010901	2784	276.155	65254				1.1461	0.2956	0.7955	0.7505	1.1363	1.5468	1.0902	0.952	1.3551	0.8683	1.2493	1.1137	1.0804	1.3731	1.177	0.9554	0.5012	1.221	0.3279	0.8157	0.954	1.1495	1.4263	1.1396	1.1058	0.5971	0.9948	0.7111	0.3301	0.7829	1.2204	1.0218	0.8531	1.2518	0.9277	0.9949	1.0951
578	gamma-glutamylcitrulline*	Peptide	Gamma-glutamyl Amino Acid	62104	LC/MS Pos Early	100020241	1644	305.146					1.4136	0.9672	1.4421	1.1259	0.5905	1.1471	1.4476	0.8769	1.0356	0.9842	1.638	0.5776	1.4694	0.6647	0.7223	1.0158	0.679	2.1841	0.8182	0.6436	0.4722	1.0398	0.7107	0.7643	0.2842	0.5396	0.3484	0.8019	0.877	0.6917	2.4189	1.2722	1.8285	2.2054	1.3822	1.1518	1.8844
570	gamma-glutamyl-epsilon-lysine	Peptide	Gamma-glutamyl Amino Acid	33934	LC/MS Pos Early	100001262	2725	276.155	7015685	17105-15-6		HMDB03869	0.869	0.5672	0.869	0.9986	0.9555	1.2893	1.1446	0.9853	1.1847	1.0014	1.2134	1.0109	1.1541	1.3433	1.2797	1.0182	0.5838	1.3584	0.6254	1.1166	0.8627	1.0918	1.4484	1.0628	0.9058	0.6318	0.8572	0.8166	0.4828	0.8169	1.0574	0.9764	0.7762	1.455	0.8955	1.4155	1.1948
563	gamma-glutamylglutamate	Peptide	Gamma-glutamyl Amino Acid	36738	LC/MS Pos Early	331	1775	277.103	92865	1116-22-9	C05282	HMDB11737	0.9446	0.6525	0.571	0.7089	1.2571	1.6307	1.2236	1.0261	0.9739	0.8388	0.6907	0.578	1.0592	0.6079	0.7715	1.1694	1.1731	1.4182	1.097	0.9528	0.8786	1.4727	1.553	1.4816	0.8839	1.6625	1.141	1.4211	1.4988	1.2737	0.644	0.8823	0.6539	0.7226	0.7296	0.8803	1.1588
564	gamma-glutamylglutamine	Peptide	Gamma-glutamyl Amino Acid	2730	LC/MS Pos Early	1140	1430	276.119	150914	10148-81-9	C05283	HMDB11738	1.2907	1.2016	1.0598	0.9121	0.8808	1.5469	1.5631	1.0132	1.5095	1.2448	0.9308	0.7726	0.8119	0.8111	0.7883	0.9365	0.9789	1.0685	0.9868	0.9659	1.0457	1.2606	0.8997	1.0775	0.6974	1.2226	1.2035	1.2564	1.1706	1.2055	0.7129	1.0883	0.872	0.7887	0.8408	0.6485	0.8608
565	gamma-glutamylglycine	Peptide	Gamma-glutamyl Amino Acid	33949	LC/MS Pos Early	100001294	1535	205.082	165527	1948-29-4		HMDB11667	1.0648	1.1452	0.5728	0.8458	1.2321	1.1264	0.974	0.836	1.1919	0.6166	1.0832	0.8755	1.1898	1.0856	0.941	1.0254	0.4362	0.7014	0.4724	0.5112	1.0754	1.6336	1.1342	1.0097	0.9903	0.7374	1.0353	0.6071	0.7192	0.9405	1.0404	1.2454	1.1179	1.1401	1.2469	0.7613	0.9652
566	gamma-glutamylhistidine	Peptide	Gamma-glutamyl Amino Acid	18245	LC/MS Pos Early	1235	2740	285.119	7017195	37460-15-4			1.5102	2.4783	0.9999	0.8679	1.4173	1.6875	0.9973	0.7988	1.3921	0.7598	0.7132	0.5932	0.9362	0.6765	0.6837	0.7956	0.4945	0.9199	0.8197	0.7454	1.4773	1.8559	1.3237	1.2107	0.9195	1.4702	1.4033	1.1928	1.0774	1.1261	0.7292	1.4489	0.8974	1.3659	1.0709	0.9913	1.0001
567	gamma-glutamylisoleucine*	Peptide	Gamma-glutamyl Amino Acid	34456	LC/MS Pos Early	100001485	2940	261.144	14253342			HMDB11170	1.3699	0.6041	0.7812	0.8913	1.3626	1.1482	1.0934	0.3452	1.1251	0.7503	0.6759	0.5669	0.7632	0.4227	0.9376	0.7102	0.6013	0.9152	0.8104	0.6069	1.0225	1.7177	1.7046	1.5901	0.9086	1.3225	0.8545	0.792	1.0956	0.9775	2.0157	1.4055	0.7758	2.1525	1.06	1.1878	1.8195
568	gamma-glutamylleucine	Peptide	Gamma-glutamyl Amino Acid	18369	LC/MS Pos Early	1268	2991	261.144	151023	2566-39-4		HMDB11171	1.1578	1.2219	0.6388	0.925	1.1439	1.2674	1.3931	0.4779	1.1555	0.7746	0.9363	0.8309	0.9677	0.8341	1.0706	0.946	0.6588	1.1353	1.0183	0.6674	1.1159	1.7553	1.3207	1.1226	0.6468	1.1725	0.9615	0.7976	1.0918	0.909	1.4635	1.4017	0.8988	1.5525	0.9781	0.9817	1.1991
571	gamma-glutamylmethionine	Peptide	Gamma-glutamyl Amino Acid	44872	LC/MS Pos Early	100001313	2640	279.101	7009567	17663-87-5		HMDB29155	2.0857	2.1329	1.6859	1.3962	0.9883	1.1798	2.3026	0.5591	1.8874	1.0863	1.3497	0.9212	1.3476	0.9754	1.6143	0.8028	0.6183	0.7932	1.7637	0.4742	1.2502	1.0117	1.0223	1.6025	0.8039	0.8099	0.6721	0.5416	0.8948	0.6354	1.5794	1.5559	1.0292	0.961	0.8439	0.3916	0.7112
572	gamma-glutamylphenylalanine	Peptide	Gamma-glutamyl Amino Acid	33422	LC/MS Pos Early	100000491	2992	295.129	111299	7432-24-8		HMDB00594	1.0799	1.2714	0.6798	0.8212	1.1823	1.0995	1.1602	0.576	0.9874	0.7068	0.7574	0.6336	1.0253	0.7328	0.9317	0.9807	0.6978	1.0855	1.201	0.6551	1.2096	1.657	1.3194	1.116	0.7619	1.4452	1.0311	0.8053	1.4632	0.997	1.2355	1.3692	0.7419	1.1572	0.9992	0.9118	1.0008
577	gamma-glutamylserine	Peptide	Gamma-glutamyl Amino Acid	54914	LC/MS Pos Early	100009231	1351	235.093		5875-35-4			0.9506	1.2875	0.654	1.0861	1.0289	1.0339	1.2404	0.9214	1.0283	0.7475	1.3122	1.3057	1.093	1.6122	1.2695	1.0167	0.727	0.6958	0.5951	0.7794	1.3882	1.2159	1.3231	1.0979	0.8055	0.6641	0.9833	0.7886	0.7855	0.7774	0.7434	1.1242	1.1001	0.8892	1.2527	0.8984	0.8206
573	gamma-glutamylthreonine	Peptide	Gamma-glutamyl Amino Acid	33364	LC/MS Pos Early	100001314	1750	249.108	76078708	5652-48-2		HMDB29159	1.1726	0.7696	0.3183	1.3413	1.0751	1.1144	1.1763	0.8722	1.0161	1.0788	0.9805	0.4059	0.8677	0.7836	1.0893	1.2165	0.6268	1.0861	0.9428	0.799	1.1191	1.3914	1.0381	1.3595	0.6597	1.0218	1.191	0.9818	1.0265	1.1187	0.9839	1.2974	0.7295	0.8857	0.3459	0.666	0.8825
574	gamma-glutamyltryptophan	Peptide	Gamma-glutamyl Amino Acid	33947	LC/MS Pos Early	100001295	2975	334.14	3989307	66471-20-3		HMDB29160	1.4938	1.0098	0.7006	0.7965	1.0188	1.1708	1.0082	0.8299	1.039	0.7428	0.7863	0.5865	0.9824	0.729	0.9912	0.9256	0.6721	1.0313	0.9464	0.7503	1.1068	2.1731	1.1891	1.3126	0.8586	1.3117	1.3051	1.084	1.451	1.2431	1.3632	1.1005	0.8707	0.9943	0.8742	0.8904	0.9279
575	gamma-glutamyltyrosine	Peptide	Gamma-glutamyl Amino Acid	2734	LC/MS Pos Early	1102	2518	311.124	94340	7432-23-7		HMDB11741	1.5497	2.0647	0.9795	0.8318	1.0031	1.3682	1.3799	0.9394	1.1556	1.2839	0.5698	0.5187	1.2743	0.7881	0.7874	1.2648	0.8175	0.8268	1.4833	1.1446	1.0654	1.721	0.8635	1.1821	0.8001	2.2751	1.3664	0.6899	2.1126	1.4883	0.9433	0.9969	0.652	0.7532	1.0126	0.7944	0.6877
576	gamma-glutamylvaline	Peptide	Gamma-glutamyl Amino Acid	43829	LC/MS Pos Early	100001126	2700	247.129	7015683	2746-34-1		HMDB11172	1.0177	0.7469	0.7798	1.0278	1.1145	1.3673	1.0951	0.7374	1.1796	0.7521	0.5558	0.5075	0.7191	0.6631	1.0566	1.1041	0.7642	1.1119	0.9842	0.9553	0.9058	1.5561	1.2542	1.1494	0.7923	1.0924	0.9722	0.8885	1.0909	0.9366	1.7479	1.001	0.8466	1.6606	0.8008	1.0379	1.2372
4045	gamma-tocopherol/beta-tocopherol	Cofactors and Vitamins	Tocopherol Metabolism	52473	LC/MS Pos Late	100008998	2384	416.364					0.9804	1.155	1.1992	1.3893	1.2772	0.9581	0.8768	0.8899	1.2227	1.0753	0.3088	0.2488	0.5438	0.3596	0.4062	1.4366	1.7309	1.6377	1.6502	1.1972	1.349	0.6507	0.6681	0.8334	0.5502	1.4844	1.4183	1.5924	2.1692	1.8209	0.1255	0.559	1.062	1.0196	0.5135	1.0293	0.2149
4301	genistein	Xenobiotics	Food Component/Plant	32448	LC/MS Neg	100001221	3754	269.046	5280961	446-72-0	C06563	HMDB03217	9.1939	5.8666	1.061	0.5732	1.0683	0.7295	1.3116	0.2232	2.7697	0.411	0.3345	0.457	5.1735	0.438	0.4667	0.2232	0.5589	0.4098	0.887	0.669	1.5569	2.0046	2.608	1.2558	2.6246	1	0.6282	0.4436	0.8199	2.0938	3.6579	2.0752	1.885	1.964	1.9994	0.5564	0.6937
4302	genistein glucuronide*	Xenobiotics	Food Component/Plant	62063	LC/MS Neg	100020216	2895	445.078					2.4934	2.1233	0.9009	0.7311	1.0713	1.17	1.2008	0.3136	1.9819	0.724	0.5725	1.0745	2.0222	0.2915	0.8202	0.6685	0.8401	0.7945	0.8778	0.6551	1.1695	0.975	2.0666	1.0745	1.4761	1.025	0.3518	1.4806	0.6261	0.9111	3.7444	1.8788	1.7376	1.3929	2.0953	0.6842	0.8204
4457	genistein sulfate*	Xenobiotics	Food Component/Plant	62061	LC/MS Neg	100020207	3616	349.002					1.2551	0.9857	1.483	1.3514	1.6162	2.152	2.2124	0.6121	2.0574	1.2356	0.3117	0.4802	0.9281	0.2157	0.8093	0.8134	0.4605	1.1426	0.8524	0.6758	0.9029	0.8371	0.9407	1.221	1.221	1.1563	0.7635	0.5855	1.0017	0.9983	2.762	1.3917	1.2296	0.8657	1.1872	1.0984	0.9812
206	gentisate	Amino Acid	Tyrosine Metabolism	18280	LC/MS Polar	100000447	905	153.019	3469	490-79-9	C00628	HMDB00152	0.565	1.0191	4.2007	0.329	0.9809	0.5661	0.7606	0.1623	1.1341	0.4005	0.344	0.4299	1.4585	0.179	0.5815	0.1238	0.2594	1.021	1.6531	0.6844	0.2814	0.1964	1.6357	0.7755	1.7079	1.9358	0.4644	1.0343	1.061	0.6582	1.6199	4.2088	0.9804	1.6579	1.1797	1.7657	2.0671
4389	gluconate	Xenobiotics	Food Component/Plant	587	LC/MS Polar	338	2922	195.051	10690	527-07-1	C00257	HMDB00625	0.9607	0.9247	0.628	0.9246	0.7448	0.8702	1.5088	0.8299	1.4263	0.9681	1.1621	0.9893	0.7328	0.9473	0.9279	1.1493	0.9719	0.9283	0.9159	1.2573	2.3172	1.0677	1.0778	1.0107	1.2361	0.6868	1.1118	1.0706	1.6067	1.7684	0.8873	1.0244	1.1496	1.3644	1.511	1.101	0.8865
1093	glucose	Carbohydrate	Glycolysis, Gluconeogenesis, and Pyruvate Metabolism	48152	LC/MS Polar	572	2342	225.062	5793	50-99-7	C00031	HMDB00122	1.1339	1.1103	1.3658	1.2794	1.141	1.0465	1.0636	1.0859	1.0222	0.9739	1.1675	1.1086	1.1584	1.1156	0.9634	0.9712	0.7773	0.927	1.0361	0.9897	0.9294	0.9094	0.8503	0.9968	1.0727	0.9471	0.9274	1.1516	0.9462	0.9066	0.8706	0.8416	1.054	0.882	1.0632	0.8996	0.967
1270	glucuronate	Carbohydrate	Aminosugar Metabolism	15443	LC/MS Polar	100000257	3233.3	193.035	444791	207300-70-7	C00191	HMDB00127	0.9925	0.8498	1.0041	1.0385	0.727	1.1288	1.349	1.2267	1.3196	1.1796	0.8332	0.7944	0.9582	0.9165	0.7749	1.069	1.2394	0.9959	1.2822	1.5361	0.8405	0.7229	0.8768	1.041	0.9393	0.8136	1.0637	1.3782	1.4035	1.1325	0.7488	0.7437	0.945	0.8101	0.9467	1.0215	1.0653
42	glutamate	Amino Acid	Glutamate Metabolism	57	LC/MS Pos Early	561	1500	148.06	611	56-86-0	C00025	HMDB00148	1.045	0.7535	0.7258	0.9275	1.0088	1.2331	0.9542	0.9755	0.7809	0.7597	0.8957	0.8405	0.961	1.0558	0.9749	0.9005	1.314	1.0031	0.8212	0.8619	1.0956	1.1753	1.3804	1.1841	1.2044	1.1775	1.1112	1.0422	1.2195	1.1684	0.8684	1.0473	0.9969	0.9778	0.922	0.9705	1.2055
43	glutamine	Amino Acid	Glutamate Metabolism	53	LC/MS Pos Early	563	1291	147.076	5961	56-85-9	C00064	HMDB00641	1.1079	1.0014	0.9567	0.857	0.9523	1.2049	1.3553	0.8939	1.2071	1.1595	0.9544	0.9846	0.7486	0.8926	0.9352	0.8784	1.1215	1.008	1.0948	0.9954	1.0868	1.0166	1.044	1.1327	0.8636	1.1794	1.0893	1.2713	1.1104	1.2157	0.7999	0.9986	0.7873	0.9494	0.9222	0.8722	0.9313
1502	glutarate (C5-DC)	Lipid	Fatty Acid, Dicarboxylate	396	LC/MS Polar	339	2900	131.035	743	110-94-1	C00489	HMDB00661	0.874	0.5583	1.7127	0.6324	0.9211	1.2715	0.6855	0.5263	0.9418	0.5163	0.9834	0.4751	1.587	0.5664	1.4665	0.4794	0.8767	0.8496	1.3852	0.5873	1.4191	0.9643	1.9604	1.9891	2.3033	1.2392	1.0166	0.8268	0.7566	1.2287	5.3054	1.2077	0.9556	1.2131	1.3118	1.4454	1.5621
119	glutarylcarnitine (C5-DC)	Amino Acid	Lysine Metabolism	44664	LC/MS Pos Early	100001593	2393	276.144	71464488	102636-82-8		HMDB13130	0.3798	0.3798	0.3798	0.8169	0.3798	0.5529	0.3798	0.8004	0.8336	1.0298	2.2983	1.498	0.8471	1.4127	1.6029	0.7092	0.3798	0.8953	0.3798	0.3798	1.2244	2.7621	0.5632	1.2444	1.0596	0.3798	0.629	0.3798	0.3798	0.3798	1.6989	0.907	1	2.7887	0.9092	1.9501	1.2441
503	glutathione, oxidized (GSSG)	Amino Acid	Glutathione Metabolism	27727	LC/MS Pos Early	448	2667	613.159	65359	103239-24-3	C00127	HMDB03337	1.8844	0.8165	0.3469	1.8138	0.6379	1.3255	1.0742	1.4989	0.7675	0.8062	1.2138	0.9618	0.7427	31.8403	0.8153	1.5036	0.7683	1.0052	0.5394	0.4288	0.5774	1.0172	1.019	0.8068	0.8135	1.2341	1.3307	0.9075	1.2252	2.2027	0.909	1.3478	2.6866	1.0632	0.9948	0.851	0.6263
1113	glycerate	Carbohydrate	Glycolysis, Gluconeogenesis, and Pyruvate Metabolism	1572	LC/MS Polar	1052	2070.4	105.019	752	600-19-1	C00258	HMDB00139	1.7893	1.4136	1.1285	1.0065	1.026	0.9087	1.2245	1.1565	0.9225	0.9935	1.4173	1.2515	1.177	1.5044	1.3527	0.9245	0.9327	0.9429	0.8733	0.7258	0.9807	1.2979	1.0803	1.1143	1.0172	0.8108	0.6245	0.7398	0.758	0.7575	1.0857	0.7581	1.1371	1.2044	1.0842	0.69	0.8621
2568	glycerol	Lipid	Glycerolipid Metabolism	15122	LC/MS Neg	1254	758	91.0401	753	56-81-5	C00116	HMDB00131	1.2469	0.9764	0.9098	0.7115	0.9308	0.727	0.3495	0.6787	0.5925	0.5513	0.755	0.6532	0.9945	0.897	1.0055	0.708	1.0089	0.5725	0.6309	0.8033	2.7963	2.9242	1.7256	1.84	1.5173	2.2277	2.524	0.7878	2.7669	2.64	1.0689	1.2063	3.3216	1.6571	2.3109	1.0185	0.85
2569	glycerol 3-phosphate	Lipid	Glycerolipid Metabolism	43847	LC/MS Pos Early	100000258	580	173.021	754	29849-82-9	C00093	HMDB00126	0.6517	1.1514	0.8257	1.2537	2.2014	0.7219	0.3155	0.5159	0.7389	0.3189	0.7293	1.2377	0.8994	6.0668	0.6786	0.6102	0.3155	0.6898	0.5457	0.6739	2.0652	1.3699	1.1275	1.1812	1.0717	1	0.6433	0.324	0.9879	0.6714	1.2135	1.85	1.1801	2.3186	1.446	1.7337	1.131
2005	glycerophosphoethanolamine	Lipid	Phospholipid Metabolism	37455	LC/MS Polar	100001620	3075	214.049	123874	33049-08-0	C01233	HMDB00114	1.0199	0.9695	0.825	0.6104	0.6692	0.838	0.9708	0.8714	1.1159	0.8911	1.2121	1.345	1.5032	1.5812	1.3617	1.0976	1.5285	0.8995	0.8091	0.8504	0.9797	0.7321	1.2999	0.9884	0.7526	1.0167	1.0139	1.4838	1.306	1.0729	1.0116	0.7825	1.0703	0.8423	1.4169	1.0728	0.9148
2574	glycerophosphoglycerol	Lipid	Glycerolipid Metabolism	48857	LC/MS Polar	100001619	2430	245.043	439964		C03274		1.1571	0.7661	0.8878	0.838	0.8079	1.1462	1.2713	0.71	1.064	0.7709	0.9039	0.7783	1.4466	0.7567	0.9928	1.0072	1.0129	1.1266	0.8703	1.0615	0.5951	0.3914	1.4598	1.1501	0.9763	0.8527	0.8566	1.193	1.344	0.9831	1.6654	0.6819	1.0635	0.9661	1.4387	2.228	1.4154
2007	glycerophosphoinositol*	Lipid	Phospholipid Metabolism	47155	LC/MS Polar	100001621	3850	333.059	167572	16824-65-0			1.1257	0.7267	1.4346	0.7491	1.0524	1.0137	0.8445	0.8189	0.9489	0.8471	0.6146	0.7262	0.8582	0.8438	0.8948	0.8561	0.9617	0.884	1.1653	1.0521	0.6549	0.7546	1.5587	1.2282	1.1527	1.2113	1.0475	1.1971	1.3829	1.2819	0.9863	0.6534	0.7321	0.9661	1.0591	1.6567	1.3271
2001	glycerophosphorylcholine (GPC)	Lipid	Phospholipid Metabolism	15990	LC/MS Pos Early	100000269	672	258.11	71920	28319-77-9	C00670	HMDB00086	1.2418	1.6046	1.1585	1.3561	1.7877	0.7112	0.829	0.8289	1.1569	1.1123	0.3636	0.4953	0.5354	0.5399	0.458	0.5748	0.4581	0.5602	0.7228	0.5165	1.1671	0.8547	0.8092	1.6078	1.059	1.148	1.058	1.2697	1.1866	0.9559	1.0441	1.2217	0.7698	1.0658	1.1525	1.1036	0.6847
2006	glycerophosphoserine*	Lipid	Phospholipid Metabolism	57404	LC/MS Pos Early	100015666	577	260.053	3081457				0.6917	0.764	0.9408	0.5307	0.6399	0.8628	1.1143	0.8011	0.9249	0.9607	0.5873	0.6976	0.9736	0.7778	0.7049	0.7521	0.956	0.8696	1.1118	1.0974	0.8267	1.0717	1.7579	1.1251	0.9312	1.9657	1.4917	1.3468	1.4471	1.8708	1.1632	0.8345	1.1496	1.1264	1.2385	1.86	1.0264
1	glycine	Amino Acid	Glycine, Serine and Threonine Metabolism	58	LC/MS Pos Early	340	1375	76.0393	750	56-40-6	C00037	HMDB00123	1.1143	1.0052	0.659	0.9398	1.4117	0.9084	0.913	0.8794	0.9153	0.6538	1.1227	1.0067	1.0855	1.2291	1.095	0.9551	0.6305	0.7145	0.5858	0.576	1.1993	1.2413	1.2675	1.1677	1.2357	0.8339	0.9948	0.7	0.779	1.0223	1.1744	1.1301	1.1165	1.2574	1.2221	0.9343	0.9559
4504	glycitein	Xenobiotics	Food Component/Plant	34024	LC/MS Pos Late	100001222	700	285.076	5317750	40957-83-3	C14536	HMDB05781	11.9005	4.708	3.321	0.1709	0.3703	0.1709	1.125	0.1709	1.5948	0.2224	0.1709	0.4789	4.7714	0.1709	0.7863	0.1709	0.1709	0.6965	1.2116	0.4192	0.9213	1.5203	1.9851	1.0139	4.9241	0.3742	0.1718	0.1709	0.3371	0.9861	2.5438	2.1027	2.0081	3.0318	2.4012	0.1709	0.2416
4507	glycitein sulfate (2)	Xenobiotics	Food Component/Plant	62887	LC/MS Neg	100021092	3400	363.018					2.7533	0.8871	2.2105	0.7546	0.7946	1.0827	2.0068	0.443	1.7386	0.815	0.3356	0.8407	1.7429	0.154	1.5403	0.6544	0.5432	1.2278	1.2624	0.6693	0.8404	0.8357	1.0577	1.1869	1.9564	0.9423	0.8149	0.5837	0.7516	0.8769	2.0069	1.5565	1.1904	1.1595	1.5702	0.9217	0.7859
3139	glycocholate	Lipid	Primary Bile Acid Metabolism	18476	LC/MS Neg	342	5163	464.302	10140	475-31-0;863-57-0	C01921	HMDB00138	0.6019	0.6019	2.266	0.6676	0.6019	0.6019	0.6019	0.6019	0.6019	0.6019	0.6244	0.6019	0.6019	0.621	0.6019	0.6019	0.6019	0.6019	0.6019	0.6019	0.6019	0.6019	0.6019	0.6019	0.6019	0.6019	0.6019	0.6019	0.6019	0.6019	1.93	1.3008	4.1143	1.2021	0.9208	0.6019	0.8188
2796	glycosyl ceramide (d18:2/24:1, d18:1/24:2)*	Lipid	Hexosylceramides (HCER)	57453	LC/MS Pos Late	100015745	3380	808.666					0.5021	1.6435	0.6496	0.5985	0.7456	0.3708	0.8765	1.0498	0.8233	0.6645	1.8181	1.2158	1.2053	1.7576	1.4821	0.6261	0.9749	0.9923	0.4811	1.5077	1.1124	0.5485	0.4373	0.91	1.2889	0.6055	0.7874	2.4572	0.5413	0.796	2.2642	1.5009	1.3502	0.9334	1.0077	3.2816	3.4427
2778	glycosyl-N-(2-hydroxynervonoyl)-sphingosine (d18:1/24:1(2OH))*	Lipid	Hexosylceramides (HCER)	57444	LC/MS Pos Late	100015752	3839	826.677					0.8656	1.3089	0.6139	1.33	0.9131	1.0138	1.0664	1.0854	1.2542	1.6182	0.9862	0.7425	0.6585	0.6998	0.6303	1.692	1.5685	2.0551	1.4091	1.4849	1.0289	1.1197	0.6417	0.7581	0.7045	1.6362	1.3991	3.582	1.227	1.4955	0.5629	0.833	0.5889	0.665	0.7355	1.9128	0.796
2771	glycosyl-N-palmitoyl-sphingosine (d18:1/16:0)	Lipid	Hexosylceramides (HCER)	53013	LC/MS Pos Late	100009272	2623	700.572					0.9654	1.06	0.7127	1.022	1.098	0.796	0.8208	0.9096	1.0918	0.8876	1.2746	0.5599	0.9181	1.0263	0.9569	1.1838	1.1318	1.1399	0.8024	1.1821	1.2451	0.8032	0.5176	0.6718	0.7901	0.6776	1.0507	1.7079	0.8546	0.6806	1.4314	0.9387	0.8982	1.0148	1.12	1.9341	0.9852
2772	glycosyl-N-stearoyl-sphingosine (d18:1/18:0)	Lipid	Hexosylceramides (HCER)	52234	LC/MS Pos Late	100001882	3053	728.604					1.1212	1.235	0.8709	0.8854	1.2268	0.6298	0.9619	1.4144	1.0752	1.0562	1.2132	0.7439	0.7478	1.1711	0.9562	1.1969	0.9454	1.0317	0.7653	1.317	1.4339	0.8344	0.304	0.7677	0.6602	0.9683	0.8825	2.1411	0.7998	0.3324	1.3787	1.0794	0.5423	0.6807	0.7152	2.6449	1.6815
742	glycylleucine	Peptide	Dipeptide	34398	LC/MS Pos Early	100001258	3059	189.123	92843	869-19-2	C02155	HMDB00759	1.1889	0.5866	1.3441	0.5741	0.9916	0.4283	0.4283	0.5606	0.4283	0.4923	1.1791	0.4283	0.5487	1.1949	1.4464	1.1163	0.4283	0.4283	0.7881	0.5971	0.6405	0.7262	1.1908	0.4283	0.4708	1.3235	1.0084	0.6636	1.0959	1.5565	0.9132	0.488	0.4283	0.9063	0.4283	1.4074	1.1293
4148	guaiacol sulfate	Xenobiotics	Benzoate Metabolism	46111	LC/MS Neg	100004208	2344	203.002	22473			HMDB60013	0.332	1.4002	4.6244	0.8198	1.5374	1.1506	1.795	0.3812	1.2767	0.4254	0.7606	0.2016	1.7766	0.7462	2.5081	0.6271	0.9108	1.8329	3.8444	2.3309	0.2067	0.4706	1.5478	0.9507	1.8508	1.4274	0.7174	1.5916	1.775	0.8093	0.714	0.9209	1.1086	1.1925	0.6417	1.8614	0.9248
466	guanidinoacetate	Amino Acid	Creatine Metabolism	43802	LC/MS Pos Early	344	1937	118.061	763	352-97-6	C00581	HMDB00128	0.6224	0.9979	0.3611	0.3711	0.2054	1.931	1.677	1.0021	1.988	1.4401	0.3233	0.2816	1.943	0.7444	0.5435	1.9922	13.0337	1.7843	0.849	3.1852	0.3582	1.3177	1.5827	0.4494	1.2994	1.2113	1.5684	5.0413	0.7611	3.9059	0.1864	0.276	0.1878	0.3371	0.274	1.1343	0.6079
3857	guanine	Nucleotide	Purine Metabolism, Guanine containing	32352	LC/MS Pos Early	172	2032	152.057	764	73-40-5	C00242	HMDB00132	2.9561	0.7163	1.078	2.1583	1.3112	0.5982	0.0439	0.1786	0.0439	0.1232	1.3655	1.1453	0.6879	7.4073	1.272	0.3752	0.357	0.2581	0.0456	0.3161	0.1821	1.4138	1.318	1.3486	1.6608	2.0829	1.4918	0.2594	1.3274	2.4586	0.3693	0.3746	0.4554	1	0.9862	1.9103	0.6984
3856	guanosine	Nucleotide	Purine Metabolism, Guanine containing	1573	LC/MS Neg	1099	1662	282.084	6802	118-00-3	C00387	HMDB00133	1.6	0.4423	1.2323	1.0851	0.7444	0.5075	0.4716	0.6336	0.4474	0.658	0.9281	0.8892	0.3603	4.9957	1.0068	2.2946	0.5847	0.5611	0.6268	1.0951	0.7024	1.8237	1.648	1.042	1.2248	1.6186	1.4682	2.3025	1.0649	1.3925	0.6401	0.8177	0.5873	0.8433	0.6402	1.4314	1.1978
4020	gulonate*	Cofactors and Vitamins	Ascorbate and Aldarate Metabolism	46957	LC/MS Polar	100001586	2750	195.051	152304	20246-53-1	C00257	HMDB03290	0.7993	0.8199	0.8051	0.8622	1.1283	1.598	1.6537	1.0005	1.5528	1.0108	0.6702	0.8542	0.9348	0.7734	0.718	0.775	2.8694	1.5646	0.8443	1.1163	0.7634	0.7222	0.9995	0.7567	0.886	0.8853	0.9859	1.8093	1.2734	1.4037	1.6139	0.8046	1.0547	1.3233	1.4525	1.6796	2.3499
4067	heme	Cofactors and Vitamins	Hemoglobin and Porphyrin Metabolism	41754	LC/MS Pos Late	100001386	1124	616.176	26945	14875-96-8	C00032	HMDB03178	3.4523	1.4039	0.6739	4.1956	1.7806	1.2778	1.0659	1.5082	0.94	0.2781	1.8717	0.9495	2.6569	23.2893	0.6753	2.6159	0.7063	1.0166	1.2813	0.2343	0.4908	3.037	0.695	0.5801	0.4165	0.6141	1.456	2.4538	0.6447	1.0257	0.6489	0.8043	6.5865	0.9834	0.3105	1.3409	0.0797
1348	heptanoate (7:0)	Lipid	Medium Chain Fatty Acid	1644	LC/MS Neg	925	3670	129.092	8094	111-14-8	C17714	HMDB00666	1.4736	1.1036	1.0847	1.1351	0.463	0.9205	0.5445	0.818	0.7594	0.8919	3.3535	0.8933	1.0511	1.7768	2.0248	1.0146	1.2468	0.9854	1.0486	1.1139	0.6821	1.0509	0.7588	0.7335	1.0853	0.9089	1.4417	0.6807	1.019	1.0629	1.0178	0.856	1.323	0.8851	0.7036	1.2358	0.6851
1412	hexadecadienoate (16:2n6)	Lipid	Long Chain Polyunsaturated Fatty Acid (n3 and n6)	57652	LC/MS Neg	100009394	5398	251.202	13932172	28290-73-5		HMDB00477	1.4906	0.7225	0.7263	0.5302	0.8238	0.4824	0.2605	1.2676	0.398	0.3493	0.4613	0.3321	0.9089	0.7939	1.2255	1.4943	1.9416	1.2034	1.1301	1.2481	2.8652	4.2125	1.8056	0.9209	1.8239	2.5572	3.0989	0.6306	2.4423	1.7083	0.8779	0.8819	1.6624	1.2284	2.1235	0.6424	0.5491
1538	hexadecanedioate (C16)	Lipid	Fatty Acid, Dicarboxylate	35678	LC/MS Neg	100001614	4615	285.207	10459	505-54-4	C19615	HMDB00672	0.7849	0.9654	0.9894	0.7031	1.1345	0.7891	1.1761	7.5419	1.0953	0.9462	0.2614	0.3265	0.5458	1.0546	0.9278	11.3076	49.5917	2.1843	1.5557	6.388	1.3584	0.7547	0.6226	1.4391	0.5792	0.8384	1.3665	0.9328	1.4161	1.1932	0.6534	1.0106	1.3689	1.1114	0.972	1.3969	0.4462
1397	hexadecatrienoate (16:3n3)	Lipid	Long Chain Polyunsaturated Fatty Acid (n3 and n6)	57651	LC/MS Neg	100009393	5330	249.186	5312428	7561-64-0			1.7088	0.3872	0.6165	0.5304	0.8175	0.6101	0.3037	1.0633	0.5638	0.3656	0.375	0.3173	0.7502	0.557	1.0119	1.6367	2.7179	1.3121	1.5028	1.3425	2.401	4.5221	1.3664	0.7418	1.6969	2.7049	3.0545	0.594	2.4771	1.6968	0.9881	0.9874	1.5878	1.2041	1.8024	0.6847	0.6294
1539	hexadecenedioate (C16:1-DC)*	Lipid	Fatty Acid, Dicarboxylate	61862	LC/MS Neg	100019975	4380	283.192					0.5607	1.0123	0.5036	0.4799	0.2629	0.5611	0.6043	5.108	1.1018	0.921	0.2629	0.2629	0.2629	0.2629	0.7262	11.8555	34.9918	1.4977	1.3517	7.0931	0.7407	0.4076	0.3238	0.3401	0.3791	0.9877	1.7546	1.3431	2.9823	1.1947	0.2629	0.9479	2.0446	0.9023	1.1971	1.0808	0.2629
1657	hexanoylcarnitine (C6)	Lipid	Fatty Acid Metabolism (Acyl Carnitine, Medium Chain)	32328	LC/MS Pos Early	100000781	3358	260.186	6426853	6920-35-0		HMDB00705	0.6953	1.1549	0.6359	2.5103	2.1238	0.5643	0.4275	1.8353	0.618	0.6714	1.0853	0.8156	0.7502	4.1573	2.3926	2.2573	1.0753	1.0737	0.4485	0.966	0.5818	1.4083	2.0244	1.034	1.2887	0.3887	1.3392	0.885	0.7974	0.5809	1.0907	0.643	1.6193	1.1104	1.2548	0.7084	0.7175
83	histamine	Amino Acid	Histidine Metabolism	1574	LC/MS Pos Early	354	3035	112.087	774	51-45-6	C00388	HMDB00870	1.2632	0.6662	1.7937	1.1417	2.1303	0.2421	0.269	0.5374	0.1586	0.2706	0.3089	0.2018	1.1098	9.7553	0.4133	4.1431	0.1311	0.296	0.2335	0.4309	2.2498	2.7867	1.5727	1.5497	0.955	1.9447	4.2374	2.1425	4.0694	1.9528	0.9179	1.0133	0.4413	0.6302	0.5234	0.9996	0.9586
67	histidine	Amino Acid	Histidine Metabolism	59	LC/MS Neg	355	755.9	154.062	6274	5934-29-2	C00135	HMDB00177	1.3885	1.5424	0.8393	0.7834	1.2802	1.1559	1.0062	0.7424	1.0994	0.8113	0.9078	0.8646	0.8693	0.9484	0.8802	0.6923	0.6053	0.8282	0.7635	0.7985	1.4919	1.5853	1.3319	1.3622	0.9879	1.4041	1.21	1.3853	0.7464	1.0722	0.9269	1.2286	1.0004	1.3537	1.2283	0.9996	1.0503
4512	histidine betaine (hercynine)*	Xenobiotics	Food Component/Plant	62278	LC/MS Pos Early	100004059	2094	198.124	3083620	534-30-5			1.4491	1.1581	1.1947	1.4204	1.2232	0.6492	1.1089	0.5771	1.2602	0.9004	0.486	0.567	0.7052	1.3975	0.5526	0.5629	0.5276	0.7054	0.7403	0.5247	1.0186	1.1776	0.9814	1.7828	0.8802	0.8545	0.7264	1.0543	0.8076	1.0484	1.226	1.1692	1.0474	1.35	0.701	1.6404	0.8533
434	homoarginine	Amino Acid	Urea cycle; Arginine and Proline Metabolism	22137	LC/MS Pos Early	100000961	2882	189.135	9085	156-86-5	C01924	HMDB00670	0.8743	0.1044	0.3561	0.45	0.3176	2.9192	3.7144	1.271	4.5642	2.786	1.2566	0.8237	0.8516	0.3465	0.8134	1.3125	2.8722	2.7802	0.4207	2.7369	3.2819	0.659	0.8863	1.7963	1.1137	4.3329	2.3123	2.6783	0.6888	1.7407	0.4831	0.451	0.3072	0.1644	0.3584	1.572	2.2392
435	homocitrulline	Amino Acid	Urea cycle; Arginine and Proline Metabolism	22138	LC/MS Polar	100000963	3006.8	188.104	65072	1190-49-4	C02427	HMDB00679	0.6131	0.7105	0.8983	0.8107	0.5194	0.8875	1.598	0.6622	1.0085	0.7478	1.266	0.6729	0.8745	0.7827	0.8495	1.3146	1.4462	1.6927	1.4098	2.173	0.9915	0.841	1.2514	1.0467	1.3427	1.3295	0.8985	1.316	1.2643	1.1892	1.0948	0.818	0.9786	0.985	0.8621	1.7814	3.4702
398	homocystine	Amino Acid	Methionine, Cysteine, SAM and Taurine Metabolism	22204	LC/MS Pos Early	100000744	2785	269.062	439579	626-72-2	C01817	HMDB00676	0.6208	0.2677	0.4749	0.5213	0.7901	3.5064	1.6089	2.4643	2.3746	1.6301	0.7292	0.4327	1.4846	0.2681	0.4997	4.4423	3.2527	3.3702	4.8106	6.1502	0.5956	0.537	0.4823	0.4502	0.3077	2.5123	3.2096	6.1499	3.0772	2.3114	0.258	0.4451	0.3342	0.3619	0.544	0.743	2.673
4515	homostachydrine*	Xenobiotics	Food Component/Plant	33009	LC/MS Pos Early	100001550	1750	158.118	441447	1195-94-4	C08283	HMDB33433	1.5653	1.0841	1.315	1.3502	1.7302	4.6378	6.4534	4.5911	7.0595	4.8089	0.541	1.1154	0.6958	1.5581	0.5549	0.5168	0.4659	0.6934	0.5629	0.7011	0.544	0.8681	0.9163	1.1832	1.0157	1.2777	0.7083	0.7092	0.6066	1.294	0.8842	1.0689	0.8818	0.765	1.0548	0.9843	0.7757
73	hydantoin-5-propionate	Amino Acid	Histidine Metabolism	40473	LC/MS Polar	100002514	2080	171.041	782	5624-26-0	C05565	HMDB01212	0.7525	0.7615	0.6905	3.6232	1.1982	0.3304	0.2917	2.7957	0.2917	0.512	2.4191	2.1508	6.0178	4.0675	2.4692	0.8853	5.3044	4.2123	0.6577	4.748	0.6822	0.7186	0.6725	0.9625	2.5191	0.2917	0.71	1.692	0.2917	0.2917	1.5836	0.8995	1.3971	0.917	1.0255	3.8801	1.1042
5291	hydroquinone sulfate	Xenobiotics	Drug - Topical Agents	35322	LC/MS Neg	100001604	1395	188.986	161220	123-31-9	C00530	HMDB02434	0.9134	1.8195	4.827	0.6178	0.9758	1.1528	1.2163	0.3742	1.3372	0.3905	0.4292	0.1597	1.487	1.6816	0.619	0.2514	0.3065	0.8493	2.0029	0.8758	0.6006	0.4204	2.217	0.8199	2.898	1.2247	0.5708	0.4313	1.4124	0.5918	1.0204	1.6271	1.1459	1.1481	1.5205	1.6336	1.164
41	hydroxyasparagine	Amino Acid	Alanine and Aspartate Metabolism	62060	LC/MS Pos Early	100020205	1149	149.056	97663		C03124	HMDB32332	0.759	0.4925	0.4204	0.7481	0.6592	1.0967	1.0026	1.4289	0.9709	1.121	0.98	0.8944	1.0037	0.8593	0.9808	1.9122	1.9361	1.333	1.8579	1.6122	0.9501	0.8502	0.8716	0.8386	1.1079	1.449	1.4107	1.7304	1.6996	1.5382	0.7576	0.655	0.7265	0.6512	0.7913	1.0685	1.1049
110	hydroxy-N6,N6,N6-trimethyllysine*	Amino Acid	Lysine Metabolism	62959	LC/MS Pos Early	100021123	2759	205.155					1.2178	0.8287	1.1414	0.6784	1.2626	1.0398	0.8101	1.1916	0.7164	0.6664	0.5414	0.908	0.9704	1.0106	0.5504	1.3176	0.8063	0.5728	0.9271	0.9599	0.902	1.4089	1.9104	1.4119	1.2113	1.4594	1.4088	0.7234	0.9657	2.0271	1.1337	0.9894	0.7484	1.4471	1.1309	0.7237	0.8807
2818	hydroxypalmitoyl sphingomyelin (d18:1/16:0(OH))	Lipid	Sphingomyelins	62851	LC/MS Pos Late	100021000	2056	719.57					1.3845	1.6305	1.1277	1.3383	0.6205	0.9835	0.8561	0.889	1.3198	1.2964	0.7104	0.5332	0.3895	0.5826	1.0057	0.9967	1.1861	0.9012	1.1595	0.5406	1.5907	1.6047	0.8132	1.1503	1.1731	1.189	1.4562	1.9353	1.3547	1.136	0.9422	0.6766	1.0033	0.9087	0.7627	1.2864	0.4268
415	hypotaurine	Amino Acid	Methionine, Cysteine, SAM and Taurine Metabolism	590	LC/MS Pos Early	358	724	110.027	107812	300-84-5	C00519	HMDB00965	0.9096	0.8528	1.1548	0.5392	0.5226	0.5141	1.0407	1.4052	0.8968	0.7225	0.9089	1.3845	1.3517	3.639	2.9929	1.2529	2.8707	2.0544	2.7729	2.7073	1.0326	0.4354	0.7417	2.2103	0.7613	1.6584	1.3274	1.4643	0.9674	1.4472	0.5356	0.7846	0.6097	0.5568	0.4084	0.9366	0.8099
3797	hypoxanthine	Nucleotide	Purine Metabolism, (Hypo)Xanthine/Inosine containing	3127	LC/MS Neg	171	1291.2	135.031	790	68-94-0	C00262	HMDB00157	0.7023	0.6053	0.9729	0.4473	1.3397	0.425	0.357	0.4478	0.3649	0.4609	0.7669	0.681	0.6302	1.3496	0.6612	0.3892	0.4514	0.5268	0.4238	0.4503	1.5831	1.2948	2.2265	1.4945	1.7829	1.7909	1.6838	1.5484	1.7399	1.5181	1.2244	1.1142	0.9025	1.0271	1.037	1.3132	1.4681
78	imidazole lactate	Amino Acid	Histidine Metabolism	15716	LC/MS Pos Early	100000263	2040	157.061	793	14403-45-3	C05568	HMDB02320	1.3559	2.0556	0.7363	2.121	0.8904	0.9914	0.4139	0.43	0.8558	0.5245	1.2643	0.9271	1.0693	0.8571	1.0961	2.3204	0.5848	4.5958	0.6383	0.6564	0.6792	1.3481	1.6825	2.2546	1.1038	0.7225	0.7923	1.0086	0.389	1.1706	2.7647	0.4392	1.2394	0.8648	1.7756	1.4082	1.0126
76	imidazole propionate	Amino Acid	Histidine Metabolism	40730	LC/MS Pos Early	100003434	2263	141.066	70630	1074-59-5		HMDB02271	0.5735	1.1695	1.6088	0.1082	0.5362	2.9658	4.172	0.1082	0.7976	0.1082	1.1477	0.3388	1.285	1.1513	0.1082	0.1082	0.1082	0.1082	0.1082	0.6363	0.1082	0.1082	0.8895	0.4759	1.1105	1.7846	0.1082	0.4284	0.1082	0.1082	0.4827	0.1082	1.1294	1.4385	1.8507	0.4454	0.1082
280	indole-3-carboxylate	Amino Acid	Tryptophan Metabolism	38116	LC/MS Neg	100002185	1710	160.04	69867	771-50-6	C19837	HMDB03320	0.6178	0.6553	1.1788	0.6731	1	0.6178	1.4682	1.4661	0.9822	0.9425	0.8418	0.6877	0.8607	0.6835	0.9425	1.2341	1.0479	1.4219	1.0454	1.9601	0.6178	0.6178	0.9452	0.6178	1.0362	0.8797	1.2274	1.3325	1.0613	1.3462	0.7695	0.7023	1.0354	0.6178	0.6178	1.2332	0.6178
272	indoleacetate	Amino Acid	Tryptophan Metabolism	27513	LC/MS Neg	100001034	2200	174.056	802	6505-45-9	C00954	HMDB00197	0.9628	2.135	2.5826	1.0651	1.4586	1.2094	2.1006	0.5211	2.2296	0.8808	0.7613	0.6743	1.6712	0.9233	0.7013	0.4054	0.456	0.8116	1.6432	0.8943	1.2413	0.9018	1.6949	1	1.805	1.2972	1.016	0.9494	0.9903	0.8625	1.4925	1.569	1.6288	0.9101	1.5712	1.7836	0.6433
271	indolelactate	Amino Acid	Tryptophan Metabolism	18349	LC/MS Neg	100000463	2286	204.067	92904	832-97-3	C02043	HMDB00671	1.0259	1.5711	2.6937	0.7952	0.9678	1.2564	0.984	0.3657	1.0603	0.5078	0.4373	0.8822	0.7214	0.516	0.4262	0.5389	0.3718	0.8224	0.5858	0.3451	1.235	0.9149	1.7849	0.9281	1.6254	1.4136	0.751	0.796	1.016	0.9692	3.4441	1.0372	1.7979	1.9681	2.1854	1.2557	1.9015
275	indolepropionate	Amino Acid	Tryptophan Metabolism	32405	LC/MS Neg	100001083	2795	188.072	3744	830-96-6		HMDB02302	1.2511	2.0704	8.4585	0.1247	1.5228	1.0021	0.5621	1.1462	0.6091	0.4269	0.5224	0.2941	1.6226	1.052	0.527	0.4102	0.1247	1	2.5521	0.3966	0.1247	0.1247	1.6505	0.2704	0.6672	0.3192	0.2942	1.1997	1.0782	0.703	0.7103	3.7931	0.5277	3.5493	0.9755	2.8609	0.6191
4519	indolin-2-one	Xenobiotics	Food Component/Plant	43374	LC/MS Pos Early	100004318	2575	134.06	321710	59-48-3	C12312		0.4281	0.8131	3.9767	0.2404	0.2404	0.2404	0.2404	0.2404	0.2404	0.2404	1.2595	0.2404	1.2147	0.8629	0.2404	0.2404	0.2404	0.6103	1.2253	0.2404	0.2404	0.2404	1	0.2404	0.2404	0.2404	0.2404	0.2404	0.2404	0.2404	0.2404	1.5016	0.2404	1.5435	0.2404	0.3495	0.2404
3796	inosine	Nucleotide	Purine Metabolism, (Hypo)Xanthine/Inosine containing	1123	LC/MS Neg	361	1602.1	267.074	6021	58-63-9	C00294	HMDB00195	0.4219	0.5076	0.8228	0.542	0.6292	0.4236	0.3266	0.3926	0.5013	0.6491	1.0365	0.6669	0.5784	3.3146	1.0937	0.8691	0.5125	0.694	0.5464	0.8798	1.3338	1.9494	1.6334	0.9635	2.1834	2.0041	3.3474	1.4143	2.1781	4.1415	1.109	1.0881	1.3791	0.7157	0.9077	2.0411	2.1466
372	isobutyrylcarnitine (C4)	Amino Acid	Leucine, Isoleucine and Valine Metabolism	33441	LC/MS Pos Early	100001055	2810	232.154	168379	25518-49-4		HMDB00736	1.2233	0.8384	0.3406	1.4608	2.5697	0.8784	0.1278	0.1278	0.3832	0.1278	1.3527	1	0.6536	1.8847	1.459	0.3585	0.1278	0.49	0.2444	0.1912	0.7348	2.0504	3.0964	0.9055	1.4196	0.6322	0.8969	0.8893	0.7714	0.8861	2.1166	1.0483	2.2296	2.284	1.8833	3.0654	1.8256
1306	isocitrate	Energy	TCA Cycle	12110	LC/MS Pos Early	1206	773	210.061	1198	20226-99-7	C00311	HMDB00193	1.0156	0.7837	0.6074	0.3331	0.7818	0.9187	1.4202	0.8291	1.1697	1.0613	1.3652	1.2537	0.743	0.4074	1.2124	1.0996	1.4722	1.098	0.5526	0.938	0.9844	1.0435	1.4852	1.0923	1.3021	0.8543	0.8885	1.0848	0.8607	1.0384	0.8252	0.5471	0.4704	1.0873	1.0689	0.783	1.191
1307	isocitric lactone	Energy	TCA Cycle	54724	LC/MS Polar	100009239	2970	173.009	98259	4702-32-3			0.9962	0.7731	0.9648	1.0629	0.753	1.3724	1.1	0.966	0.8994	0.533	0.7837	0.4469	0.7147	0.6584	0.7263	1.0038	1.6486	1.1308	1.652	1.7504	0.8737	1.062	1.4542	0.7043	1.2499	1.3879	1.1157	1.582	1.8937	1.2262	0.9005	0.5926	0.5694	1.3945	0.8966	1.4441	1.1175
338	isoleucine	Amino Acid	Leucine, Isoleucine and Valine Metabolism	1125	LC/MS Pos Early	376	2800	132.102	6306	73-32-5	C00407	HMDB00172	1.1428	0.8819	0.6882	0.914	1.0924	0.9874	1.0148	0.609	0.8548	0.7756	0.9488	0.943	0.8822	0.9647	1.231	0.9155	0.9142	1.1256	1.1145	0.814	1.1085	1.37	1.126	1.1868	0.9889	1.0583	0.8717	0.9249	0.9244	1.0197	1.5382	1.1514	0.9847	1.6212	1.0252	0.9993	1.208
581	isoleucylhydroxyproline*	Peptide	Dipeptide Derivative	63051	LC/MS Pos Early	100021262	2707	245.15				HMDB28908	0.635	0.8117	0.6088	0.8218	0.7986	0.9323	1.7143	1.4654	1.0463	0.9338	1.0634	0.8686	1.0786	0.8915	0.9946	1.5958	1.6486	1.4728	1.5842	1.4792	1.3584	0.7156	0.7669	1.1511	1.056	1.3408	1.1321	1.5056	1.629	1.2485	0.9277	0.7556	1.0054	0.7825	0.8273	0.8073	0.9865
309	isovalerate (C5)	Amino Acid	Leucine, Isoleucine and Valine Metabolism	44656	LC/MS Neg	100000708	1564	101.061	10430	503-74-2	C08262	HMDB00718	0.9983	0.7522	1.6281	0.4987	1.0752	0.8468	1.123	0.8053	0.9954	0.5515	0.6942	0.8625	1.7203	0.9092	1.3317	1.0017	1.2881	1.2001	1.6114	1.58	1.3178	1.8265	2.1423	1.5326	0.6071	0.4936	0.5705	0.6193	0.5173	0.6065	1.2844	1.0406	0.6798	1.1832	1.1823	1.0154	0.9923
311	isovalerylcarnitine (C5)	Amino Acid	Leucine, Isoleucine and Valine Metabolism	34407	LC/MS Pos Early	100001393	3085	246.17	6426851	31023-24-2		HMDB00688	1.4575	1.3725	0.6194	1	2.224	0.8178	0.3602	0.1682	0.4592	0.1682	2.0535	0.7315	1.0857	2.2044	1.8354	0.5511	0.3381	0.6621	0.329	0.5926	0.647	2.218	3.123	0.9767	1.1092	0.7293	0.7997	0.9339	0.9369	0.9408	2.1698	1.6638	1.3536	2.6021	1.6333	2.3351	1.5042
1318	itaconate	Energy	TCA Cycle	18373	LC/MS Polar	100000455	2969	129.019	811	97-65-4	C00490	HMDB02092	0.3857	0.3038	0.1747	0.8009	0.065	1.4461	0.4259	1.2	1.3492	0.3925	2.5678	1.0043	2.2823	0.9957	1.1395	1.8284	1.8226	2.9136	2.1222	2.4615	0.1732	0.1484	1.8189	0.1089	0.1982	0.7253	2.7154	0.2221	0.4759	0.3659	1.6043	1.0382	0.7286	0.9306	0.2625	2.1655	1.8594
249	kynurenate	Amino Acid	Tryptophan Metabolism	1417	LC/MS Neg	98	2224	188.035	3845	492-27-3	C01717	HMDB00715	1.009	0.8384	1.8637	0.6157	0.8466	1.5748	1.4609	0.5495	1.6347	0.4325	0.4325	0.4847	0.5872	1.1433	0.8394	0.5799	0.4325	0.991	0.8321	0.5684	0.9709	1.4187	0.882	1.1993	2.3987	1.6288	1.4589	1.4209	1.0745	2.0117	1.9793	0.7463	1.3737	0.9508	1.0307	2.1834	0.5173
245	kynurenine	Amino Acid	Tryptophan Metabolism	15140	LC/MS Pos Early	100000265	2739	209.092	161166	2922-83-0	C00328	HMDB00684	1.0389	0.9201	1.9903	0.9065	1.3426	0.9135	1.1429	0.5322	0.9624	0.5638	0.4365	0.3164	0.5204	0.587	0.9331	0.8272	0.6142	0.908	1.0376	0.8574	0.7737	2.4154	1.5119	1.6543	1.3084	1.9319	1.3044	1.3641	1.0577	1.7762	3.3325	1.3165	0.8871	0.8249	0.6664	2.4437	1.0946
1110	lactate	Carbohydrate	Glycolysis, Gluconeogenesis, and Pyruvate Metabolism	527	LC/MS Polar	482	1469	89.0244	612	79-33-4	C00186	HMDB00190	0.9805	0.7042	0.4486	0.5031	0.7554	1.1443	0.654	1.0034	0.6285	0.7833	0.6139	0.812	0.6313	0.7131	0.8607	0.7293	1.2741	0.9468	0.7507	0.6719	1.3426	0.9966	1.1946	0.9902	1.1934	0.9344	1.202	1.0815	1.4749	1.1922	1.4744	1.2453	1.3718	1.0645	1.5766	1.1734	1.4158
2801	lactosyl-N-palmitoyl-sphingosine (d18:1/16:0)	Lipid	Lactosylceramides (LCER)	53010	LC/MS Pos Late	100009030	2527	862.625		4201-62-1			1.1291	1.3836	1.1157	1.2337	1.3314	0.7297	1.3186	1.5268	1.1362	1.438	0.9108	0.6884	0.7632	0.9475	0.9847	1.0983	1	1.0284	0.6747	1.1039	1.2317	0.9724	0.6615	1.2112	1.2304	0.8542	1	1.1574	0.9275	0.8094	1.0931	1.0399	0.8568	0.9161	0.8265	1.2528	0.5506
411	lanthionine	Amino Acid	Methionine, Cysteine, SAM and Taurine Metabolism	42002	LC/MS Pos Early	100003892	1730	209.059	98504	3183-08-02			0.7804	0.6833	1.0351	0.8533	1.0007	0.9993	0.6892	0.5408	0.9452	0.6343	0.3288	0.4672	1.6841	0.8522	0.4526	1.7648	1.3432	0.7132	1.695	1.5033	0.41	0.5256	0.7789	0.656	0.5956	1.0443	0.8883	0.9584	1.3069	2.4123	2.0733	2.2546	1.4384	1.8272	1.4027	2.4238	3.817
1356	laurate (12:0)	Lipid	Medium Chain Fatty Acid	1645	LC/MS Neg	181	5300	199.17	3893	143-07-7	C02679	HMDB00638	0.9873	0.8734	0.8066	1.0795	1.0714	0.8733	0.6868	0.947	0.7867	0.7558	0.9749	0.7966	0.9651	1.6431	1.0764	0.9625	1.0863	0.8288	0.8262	0.9415	1.0642	1.3871	1.1014	1.2025	1.2205	0.9556	1.6021	0.9068	1.447	1.4268	1.231	0.9387	1.3933	1.1528	1.3988	0.9685	0.7608
294	leucine	Amino Acid	Leucine, Isoleucine and Valine Metabolism	60	LC/MS Pos Early	397	2864	132.102	6106	61-90-5			1.1351	0.9898	0.6211	0.856	1.0175	0.8736	1.0422	0.511	0.8546	0.8052	1.1318	1.0831	0.8859	1.0943	1.1133	0.8464	0.8331	0.9875	1.033	0.7964	1.1047	1.2124	1.1665	1.0794	0.8775	0.936	0.8305	0.8291	0.8579	1.0007	1.3327	1.1305	1.058	1.3543	1.0748	0.9835	1.1052
582	leucylhydroxyproline*	Peptide	Dipeptide Derivative	63052	LC/MS Pos Early	100021261	2753	245.15	20847829			HMDB28930	1.4091	1.48	0.6463	1.0846	0.4895	1.4877	2.2092	1.1772	1.3728	1.2575	2.2662	1.0878	1.8445	2.0357	2.0811	2.4688	2.0384	2.7666	2.8219	2.5195	0.9009	1.0564	0.4304	0.6868	0.7855	0.807	0.7084	0.9436	0.8075	0.8774	0.6132	0.2626	0.4919	0.6286	0.3543	0.2785	0.4083
2822	lignoceroyl sphingomyelin (d18:1/24:0)	Lipid	Sphingomyelins	57330	LC/MS Pos Late	100006298	3437	815.7		60037-60-7			0.9942	1.6409	1.0744	0.9372	0.8691	0.6997	1.1476	1.0724	1.0796	1.0843	0.8924	0.7915	0.7086	1.1571	0.7158	0.8831	1.022	1.172	1.0939	1.0264	1.3163	0.7397	0.7415	1.2379	1.3007	0.8789	1.1053	1.3277	1.4267	1.0058	1.1614	1.1616	0.984	0.8878	0.9338	0.9925	0.579
1413	linoleate (18:2n6)	Lipid	Long Chain Polyunsaturated Fatty Acid (n3 and n6)	1105	LC/MS Neg	180	5535	279.233	5280450	60-33-3	C01595	HMDB00673	1.7296	0.8215	0.978	0.7796	0.9605	0.5295	0.3581	1.0903	0.4941	0.4056	0.4022	0.2819	0.7734	0.6098	1.022	1.2119	1.3641	0.8631	0.9395	1.0465	3.9653	4.3676	1.9305	2.0451	2.2346	2.6048	3.6014	0.6543	3.2123	2.8123	0.9188	1.4163	3.1624	2.0711	2.6516	0.8786	0.5181
1415	linolenate (18:3n3 or 3n6)	Lipid	Long Chain Polyunsaturated Fatty Acid (n3 and n6)	34035	LC/MS Neg	100001337	5450	277.217	5280934		C06426	HMDB03073	1.7563	0.5141	0.72	0.5914	0.8481	0.5096	0.3063	1.0232	0.4259	0.3258	0.3245	0.2471	0.6784	0.4497	0.9262	1.3527	1.8902	1.0005	0.9995	1.2355	3.9893	5.3668	1.5472	1.8039	2.0438	2.8557	4.1631	0.4899	3.5426	3.0294	0.8759	1.5313	3.267	1.9903	2.5202	0.8748	0.679
1950	linoleoyl ethanolamide	Lipid	Endocannabinoid	52608	LC/MS Neg	100006726	6150	322.275	5283446	68171-52-8		HMDB12252	2.3518	1.4502	0.3953	0.7617	1.825	0.4163	0.2198	0.9487	0.298	0.2198	0.2198	0.2198	0.3133	0.9023	0.5631	1.6202	1	0.2357	0.3545	0.2834	12.8287	8.814	2.8653	2.353	1.9991	6.4916	10.3366	0.4985	4.9233	8.5998	0.5952	4.6295	11.38	5.4595	9.0462	0.7521	0.6632
2666	linoleoyl-arachidonoyl-glycerol (18:2/20:4) [1]*	Lipid	Diacylglycerol	54955	LC/MS Pos Late	100010922	2590	658.54				HMDB07257	2.2601	1.3695	1.7078	1.0804	1.6507	1.0257	1.3524	2.4687	0.5505	0.3667	0.5561	0.6822	0.8003	1.086	1.0018	2.1254	1.0232	1.7937	0.3403	1.2127	1.8712	1.6415	1.8552	2.4102	2.5157	0.915	0.7528	0.7715	0.5695	0.8467	0.9595	1.042	0.9982	0.7247	0.8719	0.5234	0.4926
2667	linoleoyl-arachidonoyl-glycerol (18:2/20:4) [2]*	Lipid	Diacylglycerol	54956	LC/MS Pos Late	100010923	2650	658.54				HMDB07257	2.7654	2.0977	1.7411	1.3762	1.7325	0.9639	1.0016	1.6647	0.4828	0.2696	0.7256	0.6284	0.9984	1.6331	1.3492	2.2618	1.0781	1.4677	0.561	1.3157	2.2515	2.0925	1.9187	2.2735	3.3654	1.3196	0.9052	0.8858	0.7093	0.9436	0.979	1.2212	0.8831	0.5785	0.6524	0.8014	0.4449
1692	linoleoylcarnitine (C18:2)*	Lipid	Fatty Acid Metabolism (Acyl Carnitine, Polyunsaturated)	46223	LC/MS Pos Late	100003151	1430	424.342	6450015	36816-10-1		HMDB06469	0.4174	0.2523	2.314	1.9775	3.0409	0.2724	0.9383	3.3565	0.2858	0.7125	2.5831	0.908	0.8703	3.5177	5.6515	1.3053	2.4517	1.3858	0.7499	3.1168	0.8883	1.0617	1.1136	2.1119	3.9268	0.6429	1.1911	1.5726	0.7011	0.5658	0.2035	0.5972	0.4108	0.7821	0.2035	0.2035	0.2035
1739	linoleoylcholine*	Lipid	Fatty Acid Metabolism (Acyl Choline)	57463	LC/MS Pos Late	100015760	1388	366.337					0.5291	1	2.6444	0.6934	1.9022	0.3917	0.4405	0.5459	0.6932	1.8772	0.1687	0.1687	0.2692	0.1687	0.1687	0.3022	0.1687	0.2632	0.828	0.1687	1.2333	1.0948	1.4478	1.8512	0.7754	1.062	1.014	0.7541	1.1062	0.831	0.6787	2.2863	0.5785	1.7304	1.2255	1.6408	0.9061
2670	linoleoyl-docosahexaenoyl-glycerol (18:2/22:6) [1]*	Lipid	Diacylglycerol	54949	LC/MS Pos Late	100010928	2450	682.54					2.6042	0.6027	1.2725	0.7928	1.9774	1.4964	1.7634	2.2872	0.6645	0.5084	0.9294	1.0252	0.607	1.1664	0.7784	1.7771	0.7357	1.118	0.2032	0.3387	3.2703	1.8305	1.9851	2.8602	3.1133	0.4433	0.5847	0.2268	0.1348	0.6069	0.9814	1.6591	1.873	1.0186	0.7083	0.4273	1.25
2671	linoleoyl-docosahexaenoyl-glycerol (18:2/22:6) [2]*	Lipid	Diacylglycerol	54950	LC/MS Pos Late	100010929	2500	682.54				HMDB07266	4.1946	1	2.49	1.0143	3.0123	0.7992	0.8562	1.8015	0.1376	0.1332	0.5416	0.6448	1.26	1.4008	1.5403	1.5837	0.5807	0.6522	0.2037	1.2577	1.0952	2.5398	3.0665	4.4187	6.3763	0.719	0.1332	1.0874	0.1332	0.3604	1.4781	0.5823	0.1332	0.2605	0.1332	0.5747	0.1332
2658	linoleoyl-linolenoyl-glycerol (18:2/18:3) [1]*	Lipid	Diacylglycerol	54963	LC/MS Pos Late	100010926	2426	632.525				HMDB07249	2.0143	0.9827	0.6099	0.997	1.7531	1.0215	0.4462	0.4447	0.7229	0.2867	0.4095	0.3912	0.5113	0.167	0.5581	0.3901	0.6303	0.528	0.366	0.1981	3.7296	2.4819	2.0197	2.1345	1.8672	1.003	1.5283	0.0814	0.7997	0.9613	1.0504	3.0181	2.4157	2.2196	1.6524	1.2172	1.0259
2659	linoleoyl-linolenoyl-glycerol (18:2/18:3) [2]*	Lipid	Diacylglycerol	54964	LC/MS Pos Late	100010927	2478	632.525				HMDB07250	3.1257	1.2465	0.9376	1.5253	2.4892	0.6639	0.2186	0.296	0.1066	0.1066	0.2882	0.1794	0.6532	0.4011	0.8405	0.1066	0.1066	0.1066	0.3469	0.2423	2.4429	3.6773	2.2306	3.102	3.8687	1.5831	0.7006	0.1851	1.0624	0.3585	1.3685	1.6121	1.4784	0.8559	0.8424	1.4042	0.8471
2656	linoleoyl-linoleoyl-glycerol (18:2/18:2) [1]*	Lipid	Diacylglycerol	54968	LC/MS Pos Late	100010941	2720	634.54				HMDB07248	2.2793	2.2351	0.9993	1.4476	1.7451	0.7772	0.5426	0.6074	0.7713	0.3695	0.4428	0.3381	0.5003	0.3487	0.7129	0.3752	0.4877	0.4278	0.4194	0.2196	3.9327	2.4637	2.1634	2.455	2.72	1.1772	1.3791	0.2947	1.1737	1.0007	1.1674	2.1376	2.314	1.9989	1.6077	1.1013	0.5611
98	lysine	Amino Acid	Lysine Metabolism	1301	LC/MS Pos Early	407	2850	147.113	5962	56-87-1	C00047	HMDB00182	1.0717	0.3486	0.8188	0.7912	1.0613	1.1326	1.0005	0.8358	0.9995	0.8403	1.4956	1.435	1.1786	1.7404	1.3596	0.818	0.566	1.0609	0.3714	0.8178	1.0743	1.057	1.578	1.3619	1.2394	0.6398	0.8724	0.785	0.3605	0.8599	1.3046	0.935	0.9522	1.2911	1.0676	1.1178	1.0609
1314	malate	Energy	TCA Cycle	1303	LC/MS Neg	409	615.6	133.014	525	6915-15-7	C00149	HMDB00156	0.9917	0.4986	0.5576	0.7078	0.6823	1.0905	0.6667	0.8437	0.7273	0.6044	0.5012	0.6584	1.2113	0.6303	0.9075	0.8762	1.3632	0.9838	0.7298	0.7966	1.5552	1.0384	1.5801	1.2836	1.5418	1.5446	1.0862	1.0964	1.4609	1.3315	0.8983	1.2358	1.0083	0.8825	1.1848	1.283	1.0533
1514	maleate	Lipid	Fatty Acid, Dicarboxylate	20676	LC/MS Polar	100000707	2640	115.004	444266	110-16-7	C01384	HMDB00176	0.807	0.9681	1.0776	1.0903	0.5969	1.0697	0.7397	0.8043	0.8699	0.5969	0.9759	0.9217	1.0693	2.2745	1.3304	1.309	1.4978	1.2283	0.9129	1.4413	0.6752	0.9037	0.7669	0.8852	1.1045	0.7246	1	1.0313	1.0094	0.8928	1.5272	0.8997	1.7725	1.1337	1.063	1.9561	0.7917
1332	malonate	Lipid	Fatty Acid Synthesis	15872	LC/MS Polar	818	3447	103.004	867	141-82-2;26522-22-85-0	C00383	HMDB00691	1.0643	0.8859	1.0393	1.3633	0.9542	1.2179	0.9852	1.3059	1.5545	0.7512	0.9421	1.1154	0.9918	0.9108	1.0286	1.1451	0.8869	1.1769	1.1052	0.9284	0.864	0.4246	1.0661	0.5245	0.7054	0.4095	1.3921	0.3616	0.8093	1.118	0.9731	0.9529	0.8373	1.4382	1.0082	1.1153	1.1584
1331	malonylcarnitine	Lipid	Fatty Acid Synthesis	37059	LC/MS Pos Early	100001526	2086	248.113	22833583	853728-01-5		HMDB02095	1.001	1.4647	1.1408	1.4207	0.9868	0.6976	1.2008	0.8637	1.0995	0.7755	1.3197	0.8047	0.6096	1.7775	0.6425	1.0633	0.9931	0.6671	0.6925	0.787	1.3237	1.0267	1.5724	1.3334	0.6507	1.339	0.5719	0.9323	1.066	1.3201	0.999	1.2931	0.7917	0.7492	1.0278	0.844	1.4717
4252	maltol sulfate	Xenobiotics	Food Component/Plant	48696	LC/MS Neg	100006106	1503	204.981					1.7381	0.7478	1.149	0.3239	0.7881	1.6019	2.2981	0.1285	2.8288	1.6598	0.5888	0.17	0.3453	0.3854	0.4102	0.2205	0.1745	0.5949	1.771	0.1449	0.7781	0.8305	1.2511	1.5092	1.9617	1.8536	1.1923	0.4154	1.5131	1.5312	1.0305	0.8806	0.5315	0.9816	1.0184	2.3077	1.9837
1166	maltose	Carbohydrate	Glycogen Metabolism	15586	LC/MS Polar	913	3329.4	387.114	10991489	6363-53-7	C00208	HMDB00163	2.4876	1.6872	1.0284	1.165	1.2662	0.8941	0.3423	0.4911	0.3019	0.4072	2.979	10.5001	7.8203	3.0485	8.3674	3.1225	0.9822	1.6003	1.6509	0.8093	0.2952	1.8021	2.2591	0.6964	1.3405	0.8675	0.4484	0.4773	0.6302	0.7177	0.4957	0.2952	0.9458	1	1.7161	1.378	0.4574
1218	mannitol/sorbitol	Carbohydrate	Fructose, Mannose and Galactose Metabolism	46142	LC/MS Polar	100001740	2320	181.072	5780		C00794	HMDB00247	3.0176	1.3223	2.5394	1.3341	0.7375	3.6738	0.3942	0.6746	0.4269	0.7022	0.6149	0.5443	0.7381	0.4012	0.7958	0.712	0.5941	2.2902	0.5945	0.4731	0.9129	0.8601	0.9574	0.5768	0.6795	1.0426	1.1177	1.8178	1.4496	1.0645	2.508	1.576	1.4459	5.2308	2.029	3.3627	0.87
4538	mannonate*	Xenobiotics	Food Component/Plant	62864	LC/MS Polar	100003695	2736	195.051	3246006	642-99-9			0.9803	1.1492	1.0457	1.1769	0.7824	0.8234	1.0994	0.9626	0.9975	0.8888	0.6306	0.5095	0.5547	0.6324	0.6434	0.7526	0.9379	0.9289	0.9079	1.1261	0.9837	1.018	1.0856	1.393	1.4997	1.0203	1.0994	1.6967	1.2219	1.1208	1.0025	0.7472	0.7531	1.1361	0.7882	1.7722	1.3056
1219	mannose	Carbohydrate	Fructose, Mannose and Galactose Metabolism	48153	LC/MS Polar	803	2200	225.062	18950	3458-28-4	C00159	HMDB00169	0.9937	0.7842	1.0303	1.3651	1.1396	0.9552	1.484	1.9221	1.0611	1.255	1.2442	1.039	1.1114	1.0521	0.9569	0.9846	0.8749	0.9258	1.2118	1.2451	0.8825	0.8991	0.7222	0.8601	0.8824	0.8922	0.9598	1.4084	1.0063	1.0313	0.767	0.7498	0.9007	0.6069	0.8885	0.8673	1.2563
1363	margarate (17:0)	Lipid	Long Chain Saturated Fatty Acid	1121	LC/MS Neg	891	5731	269.249	10465	506-12-7		HMDB02259	1.0298	0.6424	1.1529	0.7826	1.004	0.7551	0.5605	1.3395	0.5892	0.601	0.6138	0.5535	0.8024	1.0022	1.2115	1.278	1.0752	0.8934	0.6974	1.0014	1.4855	1.7533	1.236	1.3318	1.2968	1.119	1.4053	0.6715	1.1373	1.2074	0.8533	0.8717	1.2839	1.2519	0.9986	0.6993	0.5588
380	methionine	Amino Acid	Methionine, Cysteine, SAM and Taurine Metabolism	1302	LC/MS Pos Early	415	2526	150.058	6137	63-68-3	C00073	HMDB00696	1.3654	1.2048	1.2653	0.8285	1.042	1.0523	1.5639	0.4775	1.3361	0.7981	1.1904	0.9946	1.0054	0.9695	1.0811	0.6916	0.5684	0.6671	1.329	0.4194	1.2907	0.9134	1.1015	1.3216	0.9403	0.9185	0.7683	0.5363	0.8686	0.8637	1.4031	1.3349	0.8302	1.1249	1.0062	0.7156	1.2293
385	methionine sulfone	Amino Acid	Methionine, Cysteine, SAM and Taurine Metabolism	44878	LC/MS Pos Early	100004635	1250	182.048	69961	820-10-0			0.9006	0.8514	0.8966	1.2564	1.1241	1.7456	2.0194	1.9036	2.0161	1.9452	0.5105	0.4851	0.8195	0.2573	0.4049	1.2903	1.014	1.3655	1.5226	1.5038	0.9869	1.003	0.9237	0.9527	1.0076	0.7937	0.9919	1.3041	1.2422	1.0221	1.0311	0.997	0.8051	0.9748	1.1721	0.8121	0.6478
386	methionine sulfoxide	Amino Acid	Methionine, Cysteine, SAM and Taurine Metabolism	18374	LC/MS Pos Early	100000039	1272	166.053	158980	3226-65-1	C02989	HMDB02005	1.5425	1.2519	1.1701	0.9717	1.0046	1.266	1.4762	0.3747	1.3475	0.8795	0.8261	0.6748	0.809	0.8909	0.6401	0.6361	0.4862	0.5569	0.9954	0.5689	1.1995	1.3458	1.2528	1.185	1.2268	0.9575	0.9167	0.4362	1.1419	0.8055	1.8707	1.2691	1.0967	1.2283	1.4579	0.9266	1.1042
4653	methyl glucopyranoside (alpha + beta)	Xenobiotics	Food Component/Plant	46144	LC/MS Neg	100005864	1070	193.072					1.8433	1.2483	1.0822	0.6069	0.256	0.3617	0.7955	0.256	0.9352	0.8999	1.2777	0.8637	1.3256	0.256	0.9241	1.0716	0.9499	0.8023	1.5434	1.2147	1.1734	1.6186	1.2753	0.9798	0.4479	1.1666	1.0854	0.9429	1.3832	0.9695	1.0583	1.198	0.8462	0.5131	1.4293	0.7758	0.5002
1617	methylmalonate (MMA)	Lipid	Fatty Acid Metabolism (also BCAA Metabolism)	1496	LC/MS Polar	418	3078.4	117.019	487	516-05-2	C02170	HMDB00202	0.8627	0.6966	1.0912	1.3066	1.2238	1.3533	0.749	0.5267	0.7054	0.2834	0.4468	0.255	1.2092	0.8907	1.0176	0.4083	0.7555	1.1824	1.363	1.1475	0.9628	1.3078	0.6135	1.1462	1.2008	0.417	1.4649	0.3817	0.8257	1.3649	1.6018	0.5562	1.2063	1.3652	0.7981	1.1123	1.6327
3951	methylphosphate	Nucleotide	Purine and Pyrimidine Metabolism	37070	LC/MS Pos Early	100001805	544	113	13130	7023-27-0		HMDB61711	1.5331	0.9031	0.7148	1.0554	0.6291	0.8125	0.8933	0.9994	0.9092	0.8872	0.5268	0.4978	0.7853	0.4689	0.948	1.0869	1.306	1.1187	1.0594	0.8527	0.959	1.2735	1.6391	1.0725	1.6064	1.1285	1.2855	1.007	1.1859	1.1823	1.0006	1.2038	1.1799	0.8296	0.8621	0.8316	0.7639
357	methylsuccinate	Amino Acid	Leucine, Isoleucine and Valine Metabolism	15745	LC/MS Polar	2051	2800	131.035	10349	498-21-5		HMDB01844	0.5279	0.6572	0.6537	0.4484	0.1714	0.8558	1.2807	0.9268	0.8888	0.3857	2.2877	0.8678	1.8556	0.9321	0.9625	1.5034	1.2645	1.6298	1.8275	1.6104	0.7051	0.2606	1.3886	0.3768	1.0375	0.7166	1.2204	0.3429	0.5283	0.5668	1.8497	2.0645	1.0582	1.1531	1.2211	1.7644	1.6864
2892	mevalonate	Lipid	Mevalonate Metabolism	39583	LC/MS Polar	30	1462	147.066	439230	96949-03-0	C02104	HMDB00227	1.253	0.9427	1.3401	1.2957	1.0182	0.9195	0.7088	0.5358	1.0273	0.5924	3.0014	0.9073	1.4295	0.9504	7.2469	0.943	0.9595	0.9818	1.2128	1.0767	0.5138	0.8019	1.2185	0.8906	1.1683	1.1122	0.9786	0.6895	1.1242	0.8025	1.3962	0.9702	0.9188	0.8346	1.1776	1.9323	1.2575
2893	mevalonolactone	Lipid	Mevalonate Metabolism	48118	LC/MS Pos Early	100000772	1375	131.07	10428	674-26-0		HMDB06024	1.6196	0.7443	0.8088	1.1634	0.7153	1.2568	0.6279	0.8093	0.9266	0.5323	5.106	1.1168	1.5476	0.8233	8.5772	0.9643	1.5292	0.9813	0.9933	0.9189	0.7749	0.8183	0.7803	0.6392	0.4937	1.0158	1.1919	1.4025	1.4679	0.9355	0.9407	1.5838	1.043	0.7149	1.0067	2.0163	1.4985
1968	myo-inositol	Lipid	Inositol Metabolism	1124	LC/MS Polar	363	3506.3	225.062	892	87-89-8	C00137	HMDB00211	1.0509	0.8336	1.6633	0.7397	0.8306	1.1144	0.9094	1.1652	0.8024	0.7908	0.9224	0.7541	0.8101	0.8737	0.8439	0.6235	1.3056	0.7523	0.5318	0.6131	1.2507	1.0275	1.3363	1.1052	1.2016	0.9059	0.9382	1.1179	1.2119	1.2573	1.1376	0.7703	1.0422	0.9353	1.6362	1.3095	1.2999
1360	myristate (14:0)	Lipid	Long Chain Saturated Fatty Acid	1365	LC/MS Neg	519	5440	227.202	11005	544-63-8	C06424	HMDB00806	1.1255	0.946	0.6981	0.852	1.1705	0.7115	0.5675	0.9818	0.8653	0.7548	0.7107	0.6287	0.8156	1.0468	0.9097	1.1213	1.1286	0.9384	0.8492	1.0575	2.3507	2.1633	1.2019	1.4	0.9133	1.3666	2.2008	0.7468	2.1192	1.7053	0.9815	1.247	1.841	2.2063	1.9287	1.0182	0.7587
1373	myristoleate (14:1n5)	Lipid	Long Chain Monounsaturated Fatty Acid	32418	LC/MS Neg	100001198	5346.9	225.186	5281119	544-64-9	C08322	HMDB02000	0.6871	1.3379	0.576	0.6772	1.1027	0.221	0.1921	1.5841	0.7562	0.8635	0.7698	0.4744	1.0376	1.5877	0.9599	2.1777	2.4185	1.0451	0.9533	1.7762	2.4259	2.5319	0.9824	0.7217	0.8118	1.6369	3.5379	0.9189	3.3267	2.7551	0.4553	1.1227	1.7932	3.0622	2.4556	0.5889	0.2668
2812	myristoyl dihydrosphingomyelin (d18:0/14:0)*	Lipid	Dihydrosphingomyelins	57365	LC/MS Pos Late	100009038	2060	677.559				HMDB12085	1.0546	0.7728	0.7596	1.2254	1.3457	0.9836	0.952	0.7505	2.1293	0.8787	0.4243	0.4243	0.678	0.4243	0.4243	1.1335	0.881	1.0164	1.2263	1.1554	1.2607	1.0523	0.6484	0.9808	1.165	0.948	0.8894	1.7073	1.2677	0.4243	1.8527	0.4243	0.6476	1.464	0.8417	2.2531	0.7379
130	N,N,N-trimethyl-5-aminovalerate	Amino Acid	Lysine Metabolism	57687	LC/MS Pos Early	100015962	2186	160.133	14274897				1.5194	4.8123	2.0434	1.2883	1.4956	0.5572	0.5277	0.4713	0.6355	0.6533	2.4151	1.2561	0.9243	2.6714	1.0201	0.3429	0.3975	0.5014	0.3517	0.4287	1.0953	1.5736	3.0286	1.8439	2.412	0.6794	0.9799	0.8054	0.4585	0.7018	1.6984	2.3031	2.4376	4.4776	1.5943	1.3347	0.8495
458	N,N,N-trimethyl-alanylproline betaine (TMAP)	Amino Acid	Urea cycle; Arginine and Proline Metabolism	62947	LC/MS Pos Early	100020217	2470	229.155					0.9191	0.9746	0.7159	0.9201	0.6214	1.2279	1.1655	1.6876	1.168	0.8604	1.4053	0.9266	1.1437	1.1177	0.904	1.0637	0.887	0.7931	0.8243	0.9123	1.0254	0.9737	1.0727	0.8826	0.9517	0.7807	1.1172	1.4559	0.9658	1.0854	0.7991	1.2624	0.8803	1.3041	0.9366	1.2882	1.3391
129	N,N-dimethyl-5-aminovalerate	Amino Acid	Lysine Metabolism	62819	LC/MS Pos Early	100020842	2290	146.118					0.6464	1.6097	5.6938	0.6662	0.7417	6.1457	1.2946	2.0274	1.0885	0.9584	0.3822	1.242	2.0542	2.051	0.4103	0.3822	0.3822	0.9921	0.3822	0.3822	0.4509	0.4554	1.8886	1.1879	0.9569	2.5763	0.6793	0.4469	0.9408	0.9723	0.992	1.7991	0.8526	1.1056	0.3822	2.6834	3.5211
32	N,N-dimethylalanine	Amino Acid	Alanine and Aspartate Metabolism	63151	LC/MS Pos Early	100020371	1370	118.086	5488191	2812-31-9			0.7831	0.3677	0.6274	0.6633	0.4096	1.3488	1.2157	0.9439	1.376	1.2059	0.8338	1.1056	2.1755	0.916	1.3999	2.2245	0.7852	2.9859	1.9643	0.558	0.3215	0.4288	1.507	0.8334	1.0162	1.8858	1.3604	1.529	1.8781	0.8302	0.7609	0.5298	0.6096	0.9838	0.9695	2.0304	3.7386
491	N1,N12-diacetylspermine	Amino Acid	Polyamine Metabolism	52987	LC/MS Pos Early	100002132	3105	287.244	132680	61345-83-3	C03413	HMDB02172	0.8998	0.2374	0.2461	12.0648	22.1872	0.2374	0.2374	0.2374	0.3072	0.2374	0.2374	0.2374	4.3169	0.9897	0.7437	1.7756	2.6271	4.7495	1.4656	1.348	0.8947	1.333	1.445	0.2374	0.2905	1.332	0.8058	2.1475	2.1652	0.2374	0.5137	0.7283	0.2374	0.7458	0.2374	0.5073	1.0103
3803	N1-methylinosine	Nucleotide	Purine Metabolism, (Hypo)Xanthine/Inosine containing	48351	LC/MS Pos Early	100001409	1430	283.104	65095	20245-33-4		HMDB02721	0.6799	0.6761	0.8314	0.8695	1.0339	1.0356	1.0665	1.3934	0.9763	0.9696	0.8178	0.714	0.8872	0.7449	0.8159	1.3065	1.5143	1.1407	1.1825	1.3586	1.0363	0.8875	1.2458	1.0719	0.8727	1.6318	1.5528	1.4599	1.415	1.4843	0.9059	0.7446	0.839	0.723	0.894	1.1786	0.9394
3866	N2,N2-dimethylguanosine	Nucleotide	Purine Metabolism, Guanine containing	35137	LC/MS Pos Early	100001412	2210	312.13	92919	2140-67-2		HMDB04824	0.8001	0.6178	0.8199	0.9328	1.1007	0.9405	1.1008	1.3593	0.9697	0.864	0.8187	0.6986	0.8947	0.849	0.8855	1.3487	1.6397	1.1725	1.2608	1.4066	1.0303	0.9289	1.1734	1.1493	0.8822	1.7926	1.4569	1.8387	1.5168	1.3146	0.8154	0.751	0.8814	0.7035	0.8553	1.2648	1.106
449	N2,N5-diacetylornithine	Amino Acid	Urea cycle; Arginine and Proline Metabolism	43591	LC/MS Neg	100004575	1367	215.104	65977	39825-23-5			0.9966	0.619	1.3396	1.0034	0.8005	1.3306	1.348	0.6648	1.926	1.2427	0.9955	0.7898	0.9571	1.2479	0.396	0.9425	0.8803	0.8136	1.2615	0.939	0.9418	1.233	1.9335	0.9706	1.6791	0.8893	0.969	1.0304	1.421	1.3906	1.785	0.7123	0.8315	1.2376	1.2746	1.0838	0.7726
104	N2,N6-diacetyllysine	Amino Acid	Lysine Metabolism	48455	LC/MS Neg	100006124	1604	229.119	91827	499-86-5			1.0286	0.6851	1.8089	0.8151	0.8119	1.023	1.3235	0.7588	1.4752	1.1732	0.9391	1.3411	1.1529	1.4843	0.8945	0.9201	0.6839	0.6268	0.658	1.1201	1.096	1.0087	1.7683	1.4564	1.8851	0.7324	0.9913	0.8495	0.6831	0.726	0.9453	0.6263	1.0992	0.9525	1.2712	1.2873	0.9673
99	N2-acetyllysine	Amino Acid	Lysine Metabolism	36751	LC/MS Polar	100001721	3372.6	187.109	92907	1946-82-3	C12989	HMDB00446	1.1244	0.6172	1.2447	0.7361	0.7037	0.7277	0.8102	0.8212	1.027	0.8822	1.1185	1.476	1.0509	2.7831	1.1289	0.708	0.6792	0.8831	0.5984	0.973	0.8362	1.3364	2.0449	1.8402	2.1119	0.5184	1.3847	0.7834	0.7166	0.9508	0.8923	0.6315	1.2098	1.7498	1.153	1.8761	1.3316
3927	N4-acetylcytidine	Nucleotide	Pyrimidine Metabolism, Cytidine containing	35130	LC/MS Pos Early	100001413	1580	286.103	107461	3768-18-1		HMDB05923	0.659	0.4135	0.4135	0.4865	0.4373	1.2767	1.3852	1.4017	1.1581	0.6374	0.7803	0.7588	0.6518	0.4135	0.4135	1.588	2.4757	1.0298	0.5885	1.6206	1.2322	0.4135	1.0644	0.704	0.795	1.3861	1.6264	1.5575	1.4488	1.6926	0.8505	0.4828	0.6908	0.6783	0.9294	1.3842	1.133
109	N6,N6,N6-trimethyllysine	Amino Acid	Lysine Metabolism	1498	LC/MS Pos Early	189	2825	189.16	440120	23284-33-5	C03793	HMDB01325	0.8772	0.8361	1.0447	0.8077	0.7672	0.9641	0.9054	0.987	1.1258	0.8335	0.943	0.8313	1.0275	0.9963	0.8687	1.1512	1.0436	1.1664	1.034	1.1914	0.863	0.8975	1.349	0.8896	1.0287	1.1145	1.2379	1.0788	1.0037	1.1043	0.8914	0.9467	0.7033	1.049	0.9591	1.3597	1.1563
108	N6,N6-dimethyllysine	Amino Acid	Lysine Metabolism	62862	LC/MS Pos Early	100020417	2831	175.144	193344	2259-86-1	C05545	HMDB13287	0.7389	0.6429	0.7563	0.6581	0.7127	0.8302	0.9942	1.381	1.2127	0.9762	0.8383	0.7703	0.8821	0.7675	0.8104	1.2983	1.2705	1.0473	1.3268	1.549	0.7728	1.0058	1.0506	1.027	0.9605	1.2279	1.3835	0.8893	1.062	1.0752	0.7107	0.9383	0.8616	1.0273	0.9623	1.4806	1.0298
100	N6-acetyllysine	Amino Acid	Lysine Metabolism	36752	LC/MS Polar	100001734	2612.6	187.109	92832	692-04-6	C02727	HMDB00206	0.9977	0.4897	1.0023	0.721	0.7099	1.1598	1.4474	1.069	1.1962	0.899	0.928	1.3603	0.9239	1.3546	0.8949	1.063	0.7302	0.961	0.5813	1.1426	0.8444	1.1104	1.4947	1.2798	1.3384	0.6981	1.2924	0.7447	0.7579	0.9923	0.8001	0.6923	1.0754	1.202	1.0973	1.2117	1.0343
3838	N6-carbamoylthreonyladenosine	Nucleotide	Purine Metabolism, Adenine containing	35157	LC/MS Neg	100001415	2164	411.127	161466	24719-82-2		HMDB41623	0.6129	0.5799	0.8887	0.81	0.8465	1.0234	1.1739	1.2946	1.3412	0.8701	0.7698	0.62	0.9534	0.7015	0.9522	1.5819	2.066	1.4716	1.457	1.8613	0.928	0.7936	1.1923	0.9766	0.9124	1.4991	1.2513	1.5957	1.4711	1.3204	0.8847	0.7294	0.8774	0.948	0.9124	1.3658	1.2087
106	N6-carboxyethyllysine	Amino Acid	Lysine Metabolism	37458	LC/MS Polar	100001769	4124	217.119	22283604	5746-03-02			0.8204	0.8222	1.3425	1.0792	0.7001	0.8607	1.2184	0.5876	1.3381	1.3439	0.3774	0.3156	0.5284	0.4572	0.4621	0.6818	0.9127	1.1664	1.3418	1.1884	0.617	0.755	1.2298	0.9615	1.3444	0.8403	0.9223	1.3274	1.4195	0.9647	0.7904	0.7668	1.1027	1.2144	1.1305	1.6977	1.2781
1298	N6-carboxymethyllysine	Carbohydrate	Advanced Glycation End-product	36713	LC/MS Pos Early	100001768	2500	205.118	123800	5746-04-03			0.8989	1.2386	1.2978	1.0174	0.6687	0.8966	1.1501	0.7313	1.3568	1.2641	0.4851	0.3902	0.5912	0.5149	0.4296	0.7395	0.6867	1.2008	1.103	0.9819	0.7971	0.9813	1.3086	0.9	1.1372	1.1038	1.0909	1.3489	1.3598	0.9826	0.8737	0.7465	0.9707	1.2841	1.0366	1.2723	1.0654
107	N6-methyllysine	Amino Acid	Lysine Metabolism	62860	LC/MS Pos Early	100003415	2831	161.129	164795	1188-07-4	C02728	HMDB02038	0.9393	0.8863	0.4021	0.7418	0.6615	1.0406	1.4679	2.0202	1.8626	1.4711	0.902	0.8099	1.0168	0.5373	0.8346	1.7658	1.9716	1.2745	1.9735	2.0769	0.7856	1.0991	0.8706	0.922	0.9232	1.2451	1.7688	0.9103	1.1212	0.9965	0.6699	1.0415	0.8047	1.0501	1.0035	1.2275	0.9269
3848	N6-succinyladenosine	Nucleotide	Purine Metabolism, Adenine containing	48130	LC/MS Neg	100001664	940	382.1	165243	4542-23-8		HMDB00912	1.1282	0.6874	1.3423	0.9658	0.8053	1.413	0.5639	1.0101	0.6534	0.5656	0.7261	0.3676	0.6339	0.7182	0.7287	0.9899	1.4237	1.0167	0.8618	1.0354	0.6312	1.0851	1.2786	1.2991	0.9594	1.9231	1.1438	1.8115	1.3549	1.8716	0.7746	0.5773	0.9203	0.9692	1.0436	1.7814	0.8508
72	N-acetyl-1-methylhistidine*	Amino Acid	Histidine Metabolism	43255	LC/MS Pos Early	100004299	2100	212.103	53859791				0.7023	1.4369	0.9225	0.8431	0.8306	0.9964	1.0245	1.1955	1.5449	0.5737	0.6447	0.5009	0.9017	1.3741	0.6813	1.0036	0.5682	0.8404	1.2424	0.9685	0.8107	1.0593	1.8806	1.5	1.9221	1.0323	1.2878	1.0708	0.9752	1.0408	1.2386	0.8296	1.0841	1.1609	1.3608	0.9224	0.7743
71	N-acetyl-3-methylhistidine*	Amino Acid	Histidine Metabolism	43256	LC/MS Pos Early	100002204	2056	212.103	193270	37841-04-6			0.8709	2.1812	1.8117	0.1612	0.8071	0.1612	0.8694	0.8307	1.09	0.1612	0.1612	0.3819	0.8724	1.2507	0.8485	0.1612	0.1612	0.1612	0.1612	0.1612	0.1612	1.508	1.7827	2.1022	1.9962	1.6044	0.3235	0.5862	0.3381	0.1612	0.8626	1.8473	1.0346	1	1.2995	0.1612	0.1612
30	N-acetylalanine	Amino Acid	Alanine and Aspartate Metabolism	1585	LC/MS Polar	1110	1564.8	130.051	88064	97-69-8	C02847	HMDB00766	1.129	0.8592	0.7814	1.1627	1.178	1.0783	0.9134	0.6256	0.8678	0.6785	0.5405	0.7457	0.9479	0.8435	0.8115	0.7773	1.4171	0.949	1.0767	0.8786	1.1887	1.0731	1.3453	1.1167	0.972	1.1778	0.9317	0.8567	1.4536	1.2503	1.3277	0.9105	0.9347	1.4485	1.246	1.089	1.085
440	N-acetylarginine	Amino Acid	Urea cycle; Arginine and Proline Metabolism	33953	LC/MS Pos Early	100001266	2245	217.13	67427	155-84-0	C02562	HMDB04620	1.3942	0.5637	0.5641	0.8917	0.9341	1.1343	0.9732	0.7852	1.2398	1.2461	0.7454	0.5853	0.8707	0.8871	0.864	1.1671	1.6688	1.3026	1.1657	0.8851	0.6843	1.1116	1.0454	0.8574	0.6776	0.839	1.6768	1.3282	1.8055	1.6957	1.2493	0.7542	0.6943	0.9599	1.0153	1.0754	1.0205
40	N-acetylasparagine	Amino Acid	Alanine and Aspartate Metabolism	33942	LC/MS Polar	100001257	2250	173.057	99715	4033-40-3		HMDB06028	1.2574	0.8487	1.004	0.6851	0.9678	1.5058	0.8565	0.2487	1.2601	0.6965	0.4119	0.4444	0.7064	0.5392	0.4441	0.5617	1.0252	1.2548	1.3623	0.5792	0.9027	1.2173	1.3235	0.8529	1.0378	1.515	0.996	0.7721	1.8471	1.6726	1.4609	0.9733	1.0595	2.0358	1.4461	1.0517	1.2006
36	N-acetylaspartate (NAA)	Amino Acid	Alanine and Aspartate Metabolism	22185	LC/MS Polar	100000787	3143	174.041	65065	997-55-7;997-55-7	C01042	HMDB00812	0.9617	0.7786	0.6294	0.6459	0.6337	2.0078	1.5914	1.4027	1.0609	1.1425	0.8236	1.1089	1.0199	0.7724	0.9292	1.4776	1.6511	1.4298	1.4407	1.5404	0.9313	0.7246	0.8394	0.7893	0.8906	1.5564	1.3009	1.6226	1.4957	1.5317	0.7438	0.568	0.782	0.7217	0.9012	1.5783	1.0457
3913	N-acetyl-beta-alanine	Nucleotide	Pyrimidine Metabolism, Uracil containing	37432	LC/MS Neg	100002102	773	130.051	76406	3025-95-4	C01073		0.8577	0.6067	0.5839	0.7156	0.993	1.0888	1.1816	1.007	1.2473	0.8885	0.6748	0.6639	0.9828	0.9891	0.6651	1.3701	1.0421	1.0517	1.3716	1.4023	1.086	0.8485	1.3487	0.9576	0.7768	1.3076	1.6503	1.5318	1.344	1.0996	1.2199	0.6532	1.0947	0.7349	0.8661	0.9466	0.984
81	N-acetylcarnosine	Amino Acid	Histidine Metabolism	43488	LC/MS Pos Early	100004046	2141	269.124	9903482	56353-15-2		HMDB12881	0.4438	0.2979	0.2943	0.41	0.6213	1.6438	1.4973	1.2807	1.8016	1.0041	0.3192	0.3214	0.5169	0.3992	0.295	1.7382	1.5031	1.2426	1.3402	1.5719	1.0142	0.5953	0.4454	0.6675	0.3152	2.1533	1.4975	1.7671	1.7727	1.7646	0.6126	0.297	0.6423	0.3604	0.5242	2.0564	1.3887
445	N-acetylcitrulline	Amino Acid	Urea cycle; Arginine and Proline Metabolism	48434	LC/MS Neg	100001577	940	216.099	656979	33965-42-3	C15532	HMDB00856	0.1962	0.3508	1.4192	0.1962	0.1962	0.5178	0.1962	0.1962	0.1962	0.1962	0.1962	0.1962	0.1962	0.1962	0.1962	0.1962	0.1962	1.3058	0.1962	0.1962	0.1962	0.1962	0.1962	0.1962	0.1962	0.1962	0.1962	0.1962	0.1962	0.1962	1.8527	0.3597	1.0477	2.0324	2.492	1.0179	0.4391
1296	N-acetylglucosamine/N-acetylgalactosamine	Carbohydrate	Aminosugar Metabolism	46539	LC/MS Pos Early	100006435	715	222.097	24139			HMDB00215	0.5525	0.4564	0.4544	0.6111	0.4795	0.9415	2.5207	1.141	1.2898	1.0947	0.7699	0.8202	0.6387	1.4742	0.7798	0.9161	2.7144	1.0842	1.0585	1.4225	0.7484	1.2368	1.1539	0.7619	0.7589	1.1793	1.4842	1.2518	1.3119	1.3852	1.316	0.6559	0.6981	0.6934	0.7057	1.06	1.113
1293	N-acetylglucosaminylasparagine	Carbohydrate	Aminosugar Metabolism	48149	LC/MS Pos Early	1215	1212	336.14	123826	2776-93-4	C04540	HMDB00489	0.834	0.634	0.5995	1.0863	0.7024	1.1577	1.437	1.1482	1.1507	1.2523	1.0825	0.9762	0.9543	1.0377	0.9479	2.0921	1.4231	1.3773	1.6176	1.5781	0.6574	0.9716	0.8376	0.808	0.7944	0.9435	1.3259	1.6998	1.185	0.8172	0.6065	0.6237	0.7101	1.0238	0.9386	1.2828	1.088
45	N-acetylglutamate	Amino Acid	Glutamate Metabolism	15720	LC/MS Polar	100000282	3106	188.056	70914	5817-08-03	C00624	HMDB01138	1.3948	0.9202	1.7569	0.7744	0.7001	1.8698	1.0857	0.4259	1.0181	0.8051	0.6687	0.6838	0.894	0.7341	0.6222	0.6463	0.9819	1.8239	1.0533	0.6315	0.764	0.6527	0.8859	1.0834	1.1384	1.1135	0.794	0.7685	1.3579	1.3038	1.663	0.7825	1.5285	1.3386	1.3407	2.4859	1.1985
46	N-acetylglutamine	Amino Acid	Glutamate Metabolism	33943	LC/MS Polar	100001253	2140	187.072	182230	2490-97-3	C02716	HMDB06029	1.3902	1.8161	1.7349	1.2062	1.0158	0.9883	0.8921	0.6522	1.0572	1.1739	0.7507	0.7681	1.0084	1.4223	1.0846	0.7104	0.6658	0.9414	0.8972	0.7785	0.8336	1.2706	1.314	1.3045	1.265	0.7725	0.76	0.7761	1.1619	0.9916	1.4892	1.2982	0.8812	1.2675	0.9005	0.9907	1.3692
2	N-acetylglycine	Amino Acid	Glycine, Serine and Threonine Metabolism	27710	LC/MS Polar	100001006	1780	116.035	10972	543-24-8		HMDB00532	1.0667	1.1462	1.6073	0.8541	1.2337	1.5947	0.486	0.6318	0.582	0.4847	1.015	1.1367	1.3627	1.5425	0.9008	0.8696	0.985	2.4961	0.6156	0.5378	0.9326	0.9473	1.7436	0.8202	0.8056	0.6984	0.7755	0.8705	0.9813	1.0762	2.7815	1.2556	2.7033	3.9091	2.7485	1.4377	1.3867
94	N-acetylhistamine	Amino Acid	Histidine Metabolism	48679	LC/MS Pos Early	100006123	2287	154.097	69602	673-49-4	C05135	HMDB13253	0.8122	0.9803	0.5956	0.4834	1.4744	0.467	0.6781	0.7325	0.6307	0.6082	0.245	0.3153	1.0246	0.9866	0.3714	0.7832	0.3678	0.5892	0.3557	0.8276	2.2192	2.2791	1.6107	1.5762	1.3004	1.4388	2.5314	1.0252	2.2199	1.5075	1.2223	1.5746	1.2856	1.1185	1.385	1.1013	0.9167
70	N-acetylhistidine	Amino Acid	Histidine Metabolism	33946	LC/MS Neg	100001293	900	196.073	75619	39145-52-3	C02997	HMDB32055	0.9308	1.7976	1.1837	0.6901	1.136	1.4994	0.6413	0.5149	1.0819	0.5854	0.344	0.4493	0.5359	0.932	0.4597	0.6061	0.4487	0.9907	0.874	1.0594	1.0894	1.1348	1.5239	0.9277	1.3522	1.1096	1.0334	1.0093	1.1947	1.3129	0.7604	0.9192	1.0877	1.2537	1.4999	0.7517	1.0702
340	N-acetylisoleucine	Amino Acid	Leucine, Isoleucine and Valine Metabolism	33967	LC/MS Neg	100001276	2325	172.098	306109	3077-46-1		HMDB61684	1.0927	1.1258	0.8847	0.7289	1.3434	1.4679	1.109	0.4875	1.6715	0.7411	0.3179	0.4883	0.6411	0.3876	0.9816	0.6986	0.6181	0.9498	0.9128	0.44	1.0194	1.6068	1.1211	1.3203	0.8627	1.2593	0.8927	1.0184	1.2378	1.3807	1.2981	0.6044	0.8583	1.2406	0.75	0.9653	1.0867
481	N-acetyl-isoputreanine	Amino Acid	Polyamine Metabolism	62309	LC/MS Pos Early	100020487	2305	203.139	131802901				0.7892	0.3656	0.7573	1.9539	1.5855	0.4472	0.567	0.3305	0.3563	0.468	0.7244	0.4008	1.308	0.6595	1.0214	1.1506	1.6115	1.7038	1.3037	1.5069	0.6762	1.1701	1.4305	0.6667	0.8611	0.5537	1.1025	0.6385	1.5805	1.2339	0.9786	0.8083	0.7695	1.0491	0.5503	1.2497	1.7477
247	N-acetylkynurenine (2)	Amino Acid	Tryptophan Metabolism	48757	LC/MS Neg	100006378	2378	249.088					1.278	0.869	2.2498	0.9467	0.9433	1.6198	0.8872	0.2448	1.4055	0.4184	0.206	0.2858	0.4768	1.1922	0.4962	0.2869	0.1816	0.3928	0.6218	0.322	1.1749	2.4986	2.1821	1.5273	2.5894	1.3648	1.2153	0.8545	0.8068	1.4217	1.9788	0.9302	1.0212	1.6779	1.1884	1.2944	0.9788
295	N-acetylleucine	Amino Acid	Leucine, Isoleucine and Valine Metabolism	1587	LC/MS Neg	1082	2400	172.098	70912	1188-21-2	C02710	HMDB11756	1.3477	1.1231	0.6974	0.7978	1.0186	1.2534	0.9814	0.3622	1.2618	0.8516	0.5689	0.7169	0.8331	0.7108	1.0788	0.6313	0.8326	1.0765	1.0315	0.7245	1.1844	1.3763	1.1987	1.1494	0.7372	1.0224	0.7687	0.6154	1.2441	1.2342	1.1317	0.716	1.2762	1.1999	0.8881	0.6984	0.9617
381	N-acetylmethionine	Amino Acid	Methionine, Cysteine, SAM and Taurine Metabolism	1589	LC/MS Neg	1083	1787	190.054	448580	65-82-7	C02712	HMDB11745	1.6311	1.0855	1.1073	1.2038	0.948	0.9309	1.025	0.4041	1.1922	0.8447	0.6913	0.5115	0.9411	0.9448	0.8139	0.7374	1.3382	0.843	0.9673	0.6269	1.2815	1.0773	1.4673	1.228	1.285	1.2879	0.8912	0.2256	1.6456	1.2725	1.0144	0.9856	0.8743	1.031	1.1056	0.7945	1.035
387	N-acetylmethionine sulfoxide	Amino Acid	Methionine, Cysteine, SAM and Taurine Metabolism	45428	LC/MS Pos Early	100005463	880	208.064	193368	108646-71-5			0.996	1.4185	1.3635	0.9534	1.0012	1.4082	1.4484	0.2943	1.9577	0.9674	0.2914	0.327	0.4233	0.4406	0.2068	0.3885	0.447	0.6038	1.1513	0.7472	1.3763	1.1634	1.2599	1.5082	1.3101	1.2761	0.8766	0.4901	1.7507	1.312	1.6069	0.9988	0.6968	1.0691	1.6379	0.7077	1.0326
1282	N-acetylneuraminate	Carbohydrate	Aminosugar Metabolism	32377	LC/MS Polar	1162	3072.6	308.099	439197	131-48-6	C00270	HMDB00230	0.8656	0.7122	0.704	0.7449	0.8236	0.916	1.1811	1.3077	0.9837	0.9105	0.9254	0.7238	0.7248	1.286	0.8193	1.0922	1.1974	0.806	1.0163	1.1904	0.7864	0.9495	0.9217	1.245	0.8509	1.0716	1.5236	1.1518	1.4094	1.53	1.1693	0.7003	0.9674	0.9612	1.2595	2.8133	1.1727
133	N-acetylphenylalanine	Amino Acid	Phenylalanine Metabolism	33950	LC/MS Neg	100001256	2597	206.082	74839	2018-61-3	C03519	HMDB00512	0.9441	1.1572	0.9958	0.7458	1.0549	1.4348	1.2431	0.5117	1.6294	0.795	0.4013	0.5826	0.968	0.5416	0.7462	0.7693	0.7894	1.0254	1.172	0.8915	1.1713	1.1986	1.1682	1.1154	0.9407	1.7651	1.2049	1.0524	1.7002	1.4828	1.0617	0.8343	0.8361	0.7543	0.8309	1.0042	0.7809
446	N-acetylproline	Amino Acid	Urea cycle; Arginine and Proline Metabolism	34387	LC/MS Pos Early	100001334	1695	158.081	322640	1074-79-9			1.0838	2.4318	1.5747	0.6879	0.8078	1.1945	1.0692	0.2609	1.5616	0.4969	0.6062	0.3492	0.5234	0.7426	0.3184	0.8489	0.5869	0.6915	1.0436	0.5133	2.0854	1.0476	2.1333	1.1979	2.1077	1.3932	1.3823	0.494	1.6571	1.583	1.5908	0.9868	0.8961	0.9631	1.8725	0.9682	1.0132
476	N-acetylputrescine	Amino Acid	Polyamine Metabolism	37496	LC/MS Pos Early	192	2230	131.118	122356	18233-70-0	C02714	HMDB02064	0.7692	0.6942	3.3779	0.8798	0.8013	1.0975	1.1956	1.5934	1.1497	0.7726	1.1914	0.9907	1.3983	1.9987	1.0074	1.5451	1.5294	1.2144	1.3523	1.4508	0.9926	0.7308	0.788	0.6426	0.6276	2.3135	0.7487	1.8021	0.7377	0.5509	1.5527	1.3342	0.6534	0.8104	1.4685	0.8947	1.0735
4687	N-acetylpyrraline	Xenobiotics	Food Component/Plant	48438	LC/MS Neg	100006120	2545	295.13					0.8467	2.3574	1.6922	0.5171	0.6718	1.176	1.0573	0.1812	1.2305	0.1812	0.548	0.2966	0.8698	0.3454	0.2748	0.3884	0.3869	0.5749	0.936	0.3767	1.0797	0.5545	1.6914	1.0956	2.4812	2.0626	1.1181	0.1812	1.2185	1.5209	0.8992	0.871	0.9427	1.2852	1.2525	1.8843	1.301
10	N-acetylserine	Amino Acid	Glycine, Serine and Threonine Metabolism	37076	LC/MS Polar	100001851	2000	146.046	65249	97-14-3		HMDB02931	0.9972	0.9796	1.0028	0.9517	1.1516	1.1877	0.7388	0.6594	0.7423	0.6771	0.7943	1.1412	1.2114	1.31	0.9876	0.8476	1.2251	1.6091	0.9766	0.9094	1.0333	0.907	1.5886	0.9342	0.8171	0.9347	0.8406	0.8777	1.1985	1.0702	2.0762	0.9819	1.3633	2.3666	2.1208	1.1666	1.5597
265	N-acetylserotonin	Amino Acid	Tryptophan Metabolism	1500	LC/MS Pos Early	193	1975	219.113	903	1210-83-9	C00978	HMDB01238	1.6268	0.8456	0.478	0.6842	2.4272	0.8187	0.7288	0.8794	1.157	1.0181	0.3737	0.1059	0.3791	0.3415	0.3853	0.166	0.5972	0.3644	0.1941	0.5511	0.7225	1.0379	0.9819	1.4516	1.1469	1.334	1.8645	0.0358	0.9742	2.3432	2.0063	2.1254	2.7859	1.8024	1.3169	1.1793	1.1657
2876	N-acetylsphingosine	Lipid	Sphingosines	17772	LC/MS Neg	1302	6000	340.286	5497136	3102-57-6	C00195	HMDB04950	0.7242	1.2444	0.9711	0.7691	0.5899	0.7058	1.9072	1.4753	1.0077	1.0118	1.0013	1.2946	0.7912	0.9497	0.8411	1.2754	0.7505	1.6728	0.989	0.8657	0.9775	0.7253	1.0106	0.6733	0.6601	1.7992	1.5968	1.5675	1.3898	0.9987	0.793	1.2138	0.6917	1.0275	1.1243	1.1428	0.9901
418	N-acetyltaurine	Amino Acid	Methionine, Cysteine, SAM and Taurine Metabolism	48187	LC/MS Neg	100005466	800	166.018	159864				1.0608	0.823	0.9463	0.6918	0.3095	0.9945	1.4461	1.4352	1.2582	1.4087	0.8653	1.0135	1.6539	1.7776	1.0239	1.3965	1.0903	1.4617	1.0055	1.1492	0.8053	0.8372	1.3518	1.0594	0.7698	1.11	0.9188	1.1422	0.841	0.5606	1.9791	0.7308	0.6335	1.2475	0.7087	0.9799	0.6591
17	N-acetylthreonine	Amino Acid	Glycine, Serine and Threonine Metabolism	33939	LC/MS Neg	100001274	821.6	160.061	152204	17093-74-2		HMDB62557	0.8095	0.9989	1.1948	0.9059	0.947	1.2465	0.7087	0.4996	0.834	0.7913	0.5174	0.6098	0.7336	0.5765	0.5073	0.7	0.7193	1.5245	0.8443	1.0015	1.0011	0.8164	1.2664	1.0932	0.9753	1.004	1.0844	1.0698	1.4762	1.0768	1.8276	1.1073	1.1557	2.0537	1.7665	1.2161	1.288
235	N-acetyltryptophan	Amino Acid	Tryptophan Metabolism	33959	LC/MS Neg	100001254	2630	245.093	700653	1218-34-4	C03137	HMDB13713	0.8418	1.1247	1.7591	0.7448	0.9866	2.0736	1.689	0.7788	3.1505	0.9235	0.4892	0.4882	0.6144	0.5021	0.5376	0.8108	0.5013	0.9985	1.0362	0.7738	1.0524	0.9899	1.4793	1.1976	2.4021	2.0188	1.3896	1.5439	1.4497	1.6933	1.0853	0.84	0.8812	0.6025	0.6662	1.2535	0.9435
155	N-acetyltyrosine	Amino Acid	Tyrosine Metabolism	32390	LC/MS Neg	100001104	1680	222.077	68310	537-55-3		HMDB00866	1.1566	1.4443	1.0973	0.6236	0.7096	1.7693	1.4206	0.7373	1.9186	1.0095	0.5371	0.4958	0.8311	0.4135	0.6683	1.1712	0.9855	0.9433	1.3996	0.9988	1.1656	1.0012	0.8953	0.9497	1.193	2.2707	1.6238	0.7434	1.7434	1.9703	1.041	0.9006	0.7034	0.7126	1.1424	1.0664	0.682
364	N-acetylvaline	Amino Acid	Leucine, Isoleucine and Valine Metabolism	1591	LC/MS Neg	1084	1704	158.082	66789	96-81-1		HMDB11757	1.0021	0.8478	0.7146	0.8107	1.046	1.124	0.9619	0.6394	1.1688	1.0978	0.8081	0.8379	0.6847	0.7328	1.0622	1.0569	1.0756	0.9116	0.8731	0.8468	1.1286	1.2491	1.2131	1.2308	0.9979	0.8349	0.9821	1.1418	1.2158	1.4257	1.6019	0.6736	0.8795	1.4729	1.1138	1.0329	0.9506
448	N-alpha-acetylornithine	Amino Acid	Urea cycle; Arginine and Proline Metabolism	32984	LC/MS Pos Early	100000285	2000	175.108	439232	6205-08-09	C00437	HMDB03357	1.4631	0.8195	1.0222	0.9934	0.7031	1.5093	0.6909	0.95	0.9109	0.788	0.8985	0.9215	0.8144	1.9926	0.9762	0.9491	0.6893	1.0023	0.6529	0.6439	1.1125	1.5388	1.6507	1.149	0.8532	1.2262	1.5093	0.929	1.2116	0.956	1.8881	0.8514	1.1685	3.403	1.2304	1.2935	1.2887
1940	N-arachidonoyltaurine	Lipid	Endocannabinoid	54748	LC/MS Neg	100005817	5481	410.237		119959-65-8			1.0401	0.5957	2.1005	1.0198	1.1459	0.7877	2.4431	3.6026	1.3106	1.3186	0.5642	0.4761	1.145	1	1.3496	2.2359	2.6887	1.8135	0.6011	2.1282	0.6842	0.9722	1.5306	1.4153	1.3133	0.7836	0.6205	2.5455	0.4604	0.3855	0.9528	0.4435	0.2396	0.6624	0.2396	0.6714	0.2396
3878	N-carbamoylaspartate	Nucleotide	Pyrimidine Metabolism, Orotate containing	1594	LC/MS Polar	1108	3800	175.036	93072	923-37-5	C00438	HMDB00828	1.7864	1.1232	0.9244	0.9106	3.2824	0.9148	0.5458	0.2584	0.54	0.4396	0.4509	0.3852	0.5902	0.9439	0.2526	0.4049	0.5278	0.3827	0.571	0.4196	0.83	2.8228	2.5031	1.2369	2.0723	1.3843	1.2108	1.4055	2.5547	1.8867	0.8612	4.2548	1.0561	0.8847	1.648	2.372	1.6612
447	N-delta-acetylornithine	Amino Acid	Urea cycle; Arginine and Proline Metabolism	43249	LC/MS Neg	100004523	858	173.093	9920500				1.262	0.3141	0.6997	1.1326	0.9468	1.2003	1.4373	0.9981	1.4528	1.2853	1.0942	0.9209	0.8023	1.1303	0.5022	0.9684	0.9033	0.9153	0.9161	0.9316	0.8477	1.479	1.4421	1.0019	1.0359	0.8104	0.9762	1.0168	1.1608	1.1606	1.9904	0.797	0.8817	1.3791	1.0279	0.9455	0.7235
1395	nervonate (24:1n9)*	Lipid	Long Chain Monounsaturated Fatty Acid	52674	LC/MS Neg	100001231	6804	365.342	5281120	506-37-6	C08323	HMDB02368	0.4689	1.1836	0.994	0.7783	1.5763	0.6383	0.8423	1.2359	0.8326	1.0868	0.6193	0.6415	0.8069	0.9778	0.6816	1.3505	1.4419	1.2721	0.8872	1.1805	0.9161	0.614	1.7327	1.1088	0.9358	1.7702	2.0653	1.7978	1.5127	1.7153	0.9645	1.1838	0.9637	0.8967	0.9762	1.0042	0.9958
251	N-formylanthranilic acid	Amino Acid	Tryptophan Metabolism	43549	LC/MS Neg	100004561	2150	164.035	101399	3342-77-6	C05653	HMDB04089	1.2056	1.2497	1.8637	1.204	0.629	1.2889	1.0962	0.3153	1	0.3345	2.0444	1.4265	1.04	1.1386	0.5246	0.3186	0.3153	0.653	1.7031	0.386	0.8381	0.6734	1.8321	0.6923	1.6071	0.6664	0.8608	0.3304	0.943	0.5258	1.4937	2.0398	1.7896	0.9524	1.2917	0.7898	0.8859
383	N-formylmethionine	Amino Acid	Methionine, Cysteine, SAM and Taurine Metabolism	2829	LC/MS Neg	194	1543.8	176.039	439750	4289-98-9	C03145	HMDB01015	1.0221	1.0767	0.8731	0.9726	0.9677	1.0548	1.0257	0.849	0.9599	0.9147	0.8654	0.9095	1.0336	0.9987	0.8837	0.9752	1.3786	1.0749	1.0916	0.9226	1.2908	0.7973	1.0668	1.3975	0.9077	1.0091	0.9671	0.6266	1.2764	1.1701	1.4037	1.005	1.123	1.0013	1.0995	0.9315	1.1261
214	N-formylphenylalanine	Amino Acid	Tyrosine Metabolism	48433	LC/MS Neg	100006056	2360	192.067	759256	13200-85-6			1.3105	0.9542	0.7656	0.8096	1.0028	1.2314	0.9959	0.6618	1.0133	0.7458	1.0616	0.9972	0.9093	1.3351	0.9764	0.8268	0.973	0.8629	1.0233	0.8316	1.0552	1.2369	1.0669	1.1664	1.3619	1.0377	1.0402	1.1671	1.2185	1.1705	1.3203	0.9683	1.1412	0.8657	1.0835	0.9806	0.8622
1297	N-glycolylneuraminate	Carbohydrate	Aminosugar Metabolism	37123	LC/MS Polar	100001491	3327.5	324.094	123802	1113-83-3	C03410	HMDB00833	0.9571	0.8738	0.6972	1.422	0.3784	1.6115	0.8394	2.5307	0.3673	1.5852	1.438	0.546	1.1893	2.8417	1.1784	1.5545	0.8392	1.3861	0.907	0.3673	0.7593	0.3673	0.8155	1.4771	0.3673	1	1.1957	1.3939	0.8551	0.4952	0.9905	2.3301	0.9344	1.2923	1.031	0.7134	0.6071
4552	nicotianamine	Xenobiotics	Food Component/Plant	43026	LC/MS Pos Early	100004035	1800	304.15	9882882	34441-14-0	C05324		1.7222	0.6399	0.8355	1.8262	0.6087	0.9616	0.9116	0.2763	1.1869	0.7004	0.7989	0.7056	0.756	0.4699	1.6084	1.4387	0.9953	1.6507	1.3052	0.7373	0.7349	1.0999	1.0247	0.9024	0.5697	0.8613	1.1078	0.8659	1.1036	1.0047	2.298	1.2764	0.5471	2.2258	0.676	2.6301	1.5519
3971	nicotinamide	Cofactors and Vitamins	Nicotinate and Nicotinamide Metabolism	594	LC/MS Pos Early	432	1942	123.055	936	98-92-0	C00153	HMDB01406	0.883	0.6334	1.1405	0.7301	1.7661	0.9164	1.1975	0.9122	0.8426	0.935	0.3877	0.5194	0.6473	1.0013	0.3664	0.5637	0.6053	0.5597	0.6605	0.9357	2.0628	1.3804	1.7678	1.684	1.5518	2.1937	1.5612	1.5857	1.4054	1.1742	0.9987	1.3523	0.9655	0.9871	0.9399	1.5052	1.8707
3974	nicotinamide riboside	Cofactors and Vitamins	Nicotinate and Nicotinamide Metabolism	33013	LC/MS Pos Early	100001310	2040	255.098	439924	1341-23-7	C03150	HMDB00855	0.5933	0.655	3.0884	0.7307	0.7018	1.5429	1.0913	1.5089	1.2398	1.3236	0.6597	0.4936	0.8805	0.4936	0.6084	0.8538	1.4119	1.4679	0.901	1.0496	0.6223	1.348	0.9052	0.8422	0.5885	1.504	1.3195	0.8602	1.4516	1.7579	1	0.7421	0.6791	1.0437	0.8855	2.4682	1.0132
1411	nisinate (24:6n3)	Lipid	Long Chain Polyunsaturated Fatty Acid (n3 and n6)	57810	LC/MS Neg	100015785	5657	355.264	11792612	68378-49-4		HMDB02007	1.2529	0.858	0.515	1.0677	1.2737	0.4567	0.6283	0.9474	0.6299	0.9622	0.2048	0.4748	0.2633	0.4721	0.2579	1.6471	1.8512	2.3794	1.3276	1.2775	1.5627	1.8741	1.0007	1.1668	0.9926	1.4428	2.6378	1.8402	2.124	1.8817	0.7595	0.9993	1.3564	1.2759	1.5689	0.4651	0.3443
1643	N-linoleoylglycine	Lipid	Fatty Acid Metabolism (Acyl Glycine)	32462	LC/MS Neg	1506	5510	336.254	6433346	2764-03-06			1.6608	0.7601	0.5258	0.8989	0.9761	0.2802	0.2802	0.8486	0.2802	0.2802	0.2802	0.2802	0.5698	0.2802	1.206	2.0996	1.7574	0.5899	0.4135	0.7965	2.9194	3.1325	1.3486	1.0239	1.2341	1.9956	5.2914	0.2802	3.4896	3.2649	0.8084	0.8977	3.1095	1.7931	3.6858	0.5051	0.3063
1580	N-linoleoylserine*	Lipid	Fatty Acid, Amide	61823	LC/MS Neg	100019958	5492	366.265					0.6176	1.8505	1.1351	2.25	1.1231	0.3736	0.5113	0.8204	0.3736	0.5222	0.3736	0.7419	0.6678	0.9837	0.8874	1.283	2.9255	0.3736	0.8801	0.3736	2.537	1.0423	1.9197	1.1383	0.3736	0.3736	1.1804	0.3736	0.8278	0.9677	0.3736	0.9878	1.1181	1.5134	1.341	1	0.3736
1945	N-linoleoyltaurine*	Lipid	Endocannabinoid	61826	LC/MS Neg	100005814	5505	386.237					0.7914	0.6508	1.1679	0.7153	0.7321	0.5251	0.9116	4.7051	0.666	0.7903	1.1038	0.6545	1.3301	2.0579	2.94	2.681	5.624	1.772	0.6087	2.0925	1.1248	1.134	1.5649	1.0424	1.3269	1.221	1.588	0.9576	1.1961	1.0938	1.1228	0.8422	0.7834	0.9403	0.7779	0.8226	0.4046
31	N-methylalanine	Amino Acid	Alanine and Aspartate Metabolism	37069	LC/MS Pos Early	100001823	1580	104.071	5288725	600-21-5	C02721	HMDB0094692	0.9297	1.7379	2.3253	0.7099	0.9695	1.2421	2.6277	1.7946	1.2137	0.5614	1.7166	1.6667	0.8395	2.2196	0.8211	0.8511	1.642	0.6744	1.3932	0.9823	0.5652	1.0177	0.7611	0.95	0.8313	2.7407	1.0236	1.0248	2.1656	1.1653	0.6462	0.6436	1.2003	1.7136	0.7106	1.185	0.4835
57	N-methyl-GABA	Amino Acid	Glutamate Metabolism	39577	LC/MS Pos Early	100003152	2109	118.086	70703	1119-48-8	C15987		1.6413	0.8266	0.6452	0.8786	0.4663	1.2371	1.3505	1.0179	1.0879	1.0755	1.1971	1.8247	1.0933	2.338	1.4754	1.3958	1.5012	1.3426	1.28	1.2957	0.8208	1.1939	0.7711	1.2262	0.8533	0.9821	0.9177	0.7573	0.4286	1.0449	0.6981	0.3931	1.0289	0.8948	0.7155	0.4029	0.37
457	N-methylproline	Amino Acid	Urea cycle; Arginine and Proline Metabolism	37431	LC/MS Pos Early	100001956	1335	130.086	557	475-11-6			0.9441	1.5716	3.6546	0.8091	0.998	0.5207	0.7351	0.5255	0.6927	0.5706	1.1226	0.6804	2.7723	2.4353	1.002	0.8507	0.6011	0.7417	1.2411	0.9919	0.6396	0.7009	3.0352	0.7611	1.0969	0.8387	0.9187	1.2944	1.3596	0.8519	1.191	1.299	1.1514	1.4583	1.6533	1.102	1.4779
1963	N-oleoylserine	Lipid	Endocannabinoid	57664	LC/MS Neg	100015641	5600	368.281					0.3211	1.6748	0.5285	1.2905	0.8964	0.3211	0.3211	0.9457	0.3211	0.4697	0.4809	0.3211	0.3211	0.9109	1.0509	1.7097	4.7957	0.7098	0.8483	0.9745	1.8378	0.8377	1.0255	0.3211	0.3211	0.6107	1.535	0.3211	1.3672	1.044	0.3211	0.3211	1.1124	0.3211	1.0864	0.3211	0.3211
1941	N-oleoyltaurine	Lipid	Endocannabinoid	39732	LC/MS Neg	100003119	5610	388.253	6437033	52514-04-2			0.7535	0.6665	1.0576	0.8384	0.8564	0.516	1.2731	4.1294	1.5394	1.2986	1.2369	0.8292	1.1	2.0859	2.254	3.2008	6.9136	1.9965	0.7861	2.4248	0.6294	1.078	0.9662	0.8531	0.8811	1.3461	1.1714	1.0634	1.0338	1.1306	0.6095	0.7001	0.6105	0.7938	0.4236	1.1537	0.4211
1544	nonadecanedioate (C19-DC)	Lipid	Fatty Acid, Dicarboxylate	62867	LC/MS Neg	100019970	5130	327.254		6250-70-0			0.9732	2.1164	2.417	1.0404	1.645	0.8023	0.7909	0.6991	0.5724	0.4728	0.1842	0.2139	1.0326	1	0.294	0.7506	3.5545	0.864	0.9701	0.9366	2.1635	1.2294	1.2675	6.0715	1.0476	0.7573	1.0104	0.3979	1.1614	1.4691	0.5715	0.7932	3.0881	2.7131	1.364	1.243	0.1842
1365	nonadecanoate (19:0)	Lipid	Long Chain Saturated Fatty Acid	1356	LC/MS Neg	892	6068	297.28	12591	646-30-0	C16535	HMDB00772	1.0225	0.8338	1.4375	0.8093	1.0805	0.7519	0.5997	1.2915	0.6032	0.6417	0.5914	0.597	0.7802	1.0506	0.9775	1.2389	1.2513	1.0661	0.7587	0.9604	1.7461	1.7017	1.3778	1.4525	1.7232	1.1749	1.6199	0.7485	1.3649	1.4408	0.8052	0.9208	1.7118	1.7348	1.1994	0.7526	0.5122
1639	N-palmitoylglycine	Lipid	Fatty Acid Metabolism (Acyl Glycine)	42092	LC/MS Neg	100003686	5580	312.254	151008	2441-41-0		HMDB13034	1.3946	0.8494	0.5263	0.9218	1.5915	0.5793	0.2447	1.7393	0.4671	0.2447	0.5389	0.3118	0.6885	1.105	1.7813	3.2656	3.1601	0.9178	0.5385	1.5978	2.0278	1.861	1.4156	1	1.1297	1.3827	3.2759	0.6699	3.0162	2.5338	0.91	0.9973	2.2689	2.1033	2.7903	0.8592	0.3633
2728	N-palmitoyl-sphinganine (d18:0/16:0)	Lipid	Dihydroceramides	52604	LC/MS Pos Late	100009028	3090	540.535	5283572	5966-29-0		HMDB11760	1.3134	1.3553	0.7244	1.5569	1.3576	1.2589	0.349	0.5619	2.5678	0.7633	0.2871	0.295	0.4332	1.8848	0.2563	0.6784	0.9326	0.9366	0.7572	0.6195	1.2507	1.0035	1.0445	1.4712	1.4385	1.6691	1.5341	1.2936	2.3205	1.2546	0.6083	0.927	0.7754	1.0958	0.9965	2.2482	0.8982
2736	N-palmitoyl-sphingosine (d18:1/16:0)	Lipid	Ceramides	44877	LC/MS Pos Late	1518	2893	538.519	5283564	24696-26-2		HMDB04949	1.4849	1.4312	0.6512	1.1513	1.2906	0.5395	0.5082	0.5853	0.873	0.8095	0.4159	0.4419	0.4612	4.4832	0.3588	0.5925	1.4997	0.7085	0.7164	0.7168	1.5231	1.2526	1.059	1.1898	1.2784	1.3089	1.19	1.2262	1.3031	1.0957	0.6089	0.8615	1.0245	0.9755	1.3288	1.6465	0.6247
1943	N-palmitoyltaurine	Lipid	Endocannabinoid	39835	LC/MS Neg	100003239	5560	362.237		83982-06-3			0.8238	0.8377	1.0868	0.7845	1.3017	0.4122	1.2069	3.8284	1.0298	0.8811	1.364	0.6784	1.0646	1.8802	2.0005	2.8048	4.8501	1.4604	0.3876	1.8979	0.4728	1.1509	1.2297	1.0507	0.8305	1.106	0.6238	0.636	0.903	0.6056	1.0458	0.9702	0.2133	1.2036	0.4265	1.1117	0.2656
1964	N-stearoylserine*	Lipid	Endocannabinoid	61822	LC/MS Neg	100019957	5777	370.296					0.783	2.3937	2.024	3.2751	2.5442	0.9775	1.0899	1.2268	0.7026	0.653	0.5896	1.4357	1.066	1.3062	1.0225	1.5007	2.0046	0.7033	1.5697	0.9486	2.447	0.7037	1.2452	1.3555	0.513	0.5885	0.7316	0.6576	0.7221	0.4443	0.4958	1.3164	0.7323	1.5876	1.0754	1.0611	0.4093
2740	N-stearoyl-sphingosine (d18:1/18:0)*	Lipid	Ceramides	54979	LC/MS Pos Late	1547	3392	566.551	5283565	104404-17-3		HMDB04950	1.1744	1.0788	0.488	1.7472	1.4624	0.5368	0.8562	1.4226	1.0092	0.9734	0.6	0.8995	0.5448	3.4499	0.6618	1.3416	2.3986	1.3061	0.8038	1.4009	1.2998	1.1957	0.6469	0.8771	0.9581	1.2835	1.0324	2.0672	1.2337	1.02	0.5032	0.8078	0.6941	0.7039	0.9908	1.0331	0.665
1942	N-stearoyltaurine	Lipid	Endocannabinoid	39730	LC/MS Neg	100003240	5782	390.268	168274	63155-80-6			0.9468	0.8478	1.3025	1.0282	1.4686	0.7607	1.1929	2.6284	1.43	1.0203	0.7601	0.4971	0.6786	1.2333	0.9797	1.1336	2.0544	1.0765	0.4745	1.1464	0.5931	1.3537	1.0832	1.1775	1.1392	1.1138	0.8661	0.5148	0.9695	0.7566	0.7859	1.1026	0.7188	1.2113	0.5408	1.1996	0.3178
2744	N-tetracosadienoyl-sphingosine (d18:1/24:2)*	Lipid	Ceramides	57441	LC/MS Pos Late	100015702	3858	646.613					1.0895	1.4642	0.6679	1.3822	0.935	0.5798	0.9247	1.2489	0.8428	1.1136	0.9766	1.1117	0.8856	4.6879	1.054	1.0081	1.5747	1.2384	0.7599	1.0572	1.4395	0.9714	0.9914	1.1012	1.3207	1.0185	0.9906	1.7373	0.9919	0.9757	0.9748	0.9849	1.2819	0.9801	1.1739	0.8089	0.8523
1543	octadecadienedioate (C18:2-DC)*	Lipid	Fatty Acid, Dicarboxylate	61860	LC/MS Neg	100019982	4676	309.207					0.9704	0.7634	1.6496	0.7302	1.1385	0.6766	0.7808	4.2932	0.5372	0.3573	0.2094	0.2439	0.6318	0.8134	0.6312	7.5225	39.2873	1.3978	1.2029	3.9882	2.6072	1.4454	0.9677	1.5109	0.8625	0.7438	1.4718	0.3957	1.0296	1.2872	0.7343	0.8956	1.8988	1.37	1.4896	1.0613	0.2996
1541	octadecanedioate (C18)	Lipid	Fatty Acid, Dicarboxylate	36754	LC/MS Neg	100001615	5043	313.238	70095	871-70-5		HMDB00782	0.9936	0.9779	2.0653	1.0453	1.5458	1.0064	1.2211	4.304	0.9555	0.7827	0.2903	0.3555	0.8473	0.9812	0.8542	4.8326	46.1986	2.7722	1.5777	4.0822	1.8029	1.1314	0.9308	3.2916	0.9062	0.8111	1.2879	0.7882	1.3655	1.4205	0.7295	0.8612	1.6648	1.5426	0.9075	1.0414	0.3064
1542	octadecenedioate (C18:1-DC)*	Lipid	Fatty Acid, Dicarboxylate	61861	LC/MS Neg	100019978	4875	311.223					1.0364	1.1708	1.6298	0.7581	1.2708	0.9009	0.8023	2.576	0.7674	0.5724	0.1678	0.1733	0.5582	0.6176	0.4223	5.3368	39.1378	1.5865	1.2019	3.044	2.6265	1.5096	1.0085	1.4186	0.8497	0.8682	1.5002	0.5081	1.423	1.3833	0.5404	0.9129	1.768	1.4886	1.2623	0.9915	0.227
1660	octanoylcarnitine (C8)	Lipid	Fatty Acid Metabolism (Acyl Carnitine, Medium Chain)	33936	LC/MS Pos Late	100001247	950	288.217	123701	3671-77-0	C02838	HMDB00791	0.9107	0.7036	0.7595	1.8849	2.4627	0.1959	0.2305	0.9744	0.2224	0.379	0.6181	0.5215	0.4347	1.9323	1.2055	1.0217	0.704	0.6572	0.2778	0.5291	1.0411	2.0273	2.5582	1.348	2.0456	0.4585	2.7371	0.9806	1.3694	1.133	1.5566	1.1713	3.2014	1.1808	1.6293	1.0194	0.5771
1380	oleate/vaccenate (18:1)	Lipid	Long Chain Monounsaturated Fatty Acid	52285	LC/MS Neg	100008930	5655	281.249	445639;5282761;5281127				1.2654	0.9056	0.7914	0.7502	0.8528	0.5291	0.4147	1.3537	0.7826	0.7802	0.4901	0.4056	0.7496	0.6672	1.096	1.7414	1.9177	1.0895	0.9353	1.4966	2.9	2.9821	1.2846	1.2813	1.1967	2.0413	3.1141	0.8581	3.0204	2.731	0.5802	1.0647	2.4599	1.6689	2.0832	0.6986	0.3477
1928	oleoyl ethanolamide	Lipid	Endocannabinoid	38102	LC/MS Neg	1137	6450	324.291	5283454	11-58-0;111-58-0		HMDB02088	0.1909	0.279	0.1909	0.1909	0.4887	0.1909	0.1909	0.1909	0.1909	0.1909	0.1909	0.1909	0.1909	0.1909	0.1909	0.4692	0.2359	0.1909	0.3091	0.1909	3.0472	3.2688	0.4618	0.5999	0.4019	2.6792	2.6894	1.0587	3.856	2.7994	0.1909	0.9413	1.8539	1.1989	2.2436	0.1909	0.1909
2664	oleoyl-arachidonoyl-glycerol (18:1/20:4) [1]*	Lipid	Diacylglycerol	54960	LC/MS Pos Late	100010936	2907	660.556				HMDB07228	1.9657	1.8768	0.9599	1.2249	1.2165	1.1511	1.144	1.2815	0.8503	0.778	0.54	0.7083	0.5927	0.7879	0.5742	1.6272	1.4187	1.6113	0.5078	0.9147	1.3366	1.2807	1.3361	1.3922	1.3037	0.8779	1.0034	1.5685	0.7596	1.1614	0.8246	0.9966	1.1102	0.9335	1.061	0.5737	0.4433
2665	oleoyl-arachidonoyl-glycerol (18:1/20:4) [2]*	Lipid	Diacylglycerol	54961	LC/MS Pos Late	100010937	2990	660.556				HMDB07228	2.4711	2.0208	0.989	1.3074	1.3451	1.1961	1.1794	1.4128	0.9156	0.6554	0.5874	0.7438	0.5972	0.9019	0.6816	1.6075	1.5532	1.4616	0.5387	0.8821	1.5177	1.3041	1.3308	1.3518	1.5562	0.9363	0.9947	1.6793	0.8276	1.3148	0.8545	1.0175	1.1053	0.9546	1.0053	0.6251	0.3913
1687	oleoylcarnitine (C18)	Lipid	Fatty Acid Metabolism (Acyl Carnitine, Monounsaturated)	35160	LC/MS Pos Late	100001501	1423	426.358	6441392	38677-66-6		HMDB05065	0.6054	0.5736	1.2558	1.5127	1.7703	0.3789	0.826	3.1924	0.8915	1.6973	1.9787	0.9361	1.2068	2.1684	3.0065	1.6906	4.2855	1.9921	1.0635	2.5496	1.2895	0.849	0.9365	0.861	1.7589	0.7826	1.5497	2.2719	1.5681	1.1921	0.2985	0.597	0.6031	0.8524	0.493	0.5875	0.245
1735	oleoylcholine	Lipid	Fatty Acid Metabolism (Acyl Choline)	53260	LC/MS Pos Late	100009331	1449	368.352					0.3622	1.0259	1.0861	0.3655	2.0525	0.3622	0.3622	0.3622	0.9036	2.7432	0.3622	0.3622	0.3622	0.676	0.3622	0.3622	0.3622	0.3622	1	0.3622	1.1425	0.8962	0.7918	0.9366	0.5664	1.3694	1.4195	1.047	1.8682	1.5248	0.4704	1.5666	0.6919	1.3599	1.2918	0.987	0.5487
2651	oleoyl-linoleoyl-glycerol (18:1/18:2) [1]	Lipid	Diacylglycerol	46798	LC/MS Pos Late	100002989	3115	636.556		106292-55-1		HMDB07219	2.2855	1.8364	1.3552	1.674	1.6781	1.2284	0.9808	0.8315	1.1234	0.7654	0.8171	0.7232	0.801	0.4923	1.0192	0.6224	0.7994	0.7075	0.6975	0.4703	2.7566	2.0287	1.9791	1.9699	2.0217	1.0247	1.0534	0.8168	0.9427	0.8971	1.3197	1.4871	1.625	1.5287	1.1328	0.9063	0.6571
2652	oleoyl-linoleoyl-glycerol (18:1/18:2) [2]	Lipid	Diacylglycerol	46799	LC/MS Pos Late	100002990	3223	636.556		104346-53-4		HMDB07219	2.297	1.722	1.0351	1.7193	1.5855	1.2145	0.8633	0.7718	1.0395	0.6871	0.8147	0.721	0.7552	0.5854	1.0522	0.5465	0.8373	0.6561	0.6645	0.4115	2.777	1.9409	1.729	1.8511	2.1235	0.9803	1.0197	0.7356	1.051	0.838	1.2603	1.3946	1.6496	1.4852	1.0356	0.9354	0.5792
2648	oleoyl-oleoyl-glycerol (18:1/18:1) [1]*	Lipid	Diacylglycerol	54945	LC/MS Pos Late	100010918	3571	638.572				HMDB07218	2.4098	2.7445	0.1159	2.0134	1.4226	0.8878	0.4693	0.1159	3.862	3.2583	0.2311	0.5079	0.3453	0.1159	0.1159	0.1423	0.5946	0.4366	0.9909	0.1159	2.3677	1.5095	0.9566	0.8784	0.3437	1.0858	1.3104	2.0238	1.3128	1	0.4784	1.1548	2.0743	1.2037	1.2385	0.4785	0.1159
2649	oleoyl-oleoyl-glycerol (18:1/18:1) [2]*	Lipid	Diacylglycerol	54946	LC/MS Pos Late	100010919	3695	638.572				HMDB07218	2.3277	3.1459	0.3016	1.6595	0.8794	0.8636	0.4123	0.2385	4.6594	3.8221	0.3787	0.7726	0.3787	0.2385	0.6753	0.3097	0.3979	0.3139	1.2474	0.2385	1.7282	1.4623	0.9593	0.6613	0.63	1.3121	1.6079	3.1714	1.5579	1.5601	0.543	1.0387	1.6009	1.0682	1.3378	1	0.2385
517	ophthalmate	Amino Acid	Glutathione Metabolism	34592	LC/MS Pos Early	100001311	2085	290.135	7018721	495-27-2		HMDB05765	1.3869	0.655	0.7923	1.1925	0.6401	1.552	0.7345	0.9837	0.4591	0.299	3.8448	2.9737	1.9576	9.2456	2.1989	1.8301	1.1058	1.5764	1.1275	0.8501	0.6854	1.0125	0.8865	0.8395	0.6988	1.0819	0.7241	0.7509	0.5868	0.9578	1.4142	0.9875	1.9349	3.3318	2.4428	0.4017	1.3848
428	ornithine	Amino Acid	Urea cycle; Arginine and Proline Metabolism	1493	LC/MS Pos Early	444	2800	133.097	6262	3184-13-2	C00077	HMDB03374	1.5546	0.6722	0.9777	0.9891	1.4935	0.957	0.792	0.3429	1.0109	0.5709	0.7859	0.7615	1.1555	0.8432	1.7196	1.0633	0.639	0.8626	0.6062	0.4972	1.2866	2.0603	1.476	0.9681	1.2028	1.1086	0.7531	0.6857	0.647	0.8829	3.4151	1.6763	1.2888	3.2585	1.4694	1.0729	1.3767
3880	orotate	Nucleotide	Pyrimidine Metabolism, Orotate containing	1505	LC/MS Polar	445	1638.1	155.01	967	50887-69-9	C00295	HMDB00226	1.5161	1.309	1.9059	1.6521	4.9397	1.851	0.6436	0.5885	0.9522	0.4482	0.9045	0.7065	1.0145	0.8677	0.6301	0.7305	0.447	0.6546	0.9091	0.677	0.9244	1.2536	1.0883	0.8001	0.7827	1.2158	1.3551	0.6717	0.9996	1.0703	0.8813	1.3236	1.1903	1.1507	1.0903	1.5678	0.925
3882	orotidine	Nucleotide	Pyrimidine Metabolism, Orotate containing	35172	LC/MS Polar	100001416	2250	287.052	92751	314-50-1		HMDB00788	0.5725	0.5725	0.9439	0.6632	1.1347	0.5725	0.5725	0.5725	0.5725	0.5725	0.5725	0.5725	0.5725	1.3652	0.5725	0.5725	0.5725	0.5725	0.5725	0.5725	0.5725	1.0186	0.7147	0.5725	0.5725	0.5725	0.5725	0.5725	0.5725	1.2707	0.5725	0.5725	1.2798	1.0724	0.9774	1.3191	0.8675
5368	O-sulfo-L-tyrosine	Xenobiotics	Chemical	45413	LC/MS Neg	100005384	990	260.023	514186				0.7098	0.7235	0.5775	0.6429	0.7628	0.959	1.0563	1.1278	0.9619	0.8639	0.7754	0.7571	0.8698	0.5453	0.7556	1.1929	1.196	1.1356	1.1114	1.4806	0.9673	0.8018	0.9548	0.9911	0.823	1.1318	1.3108	1.2029	1.3775	1.1843	1.1121	1.0299	1.0223	0.8229	1.0089	1.1681	0.9902
4019	oxalate (ethanedioate)	Cofactors and Vitamins	Ascorbate and Aldarate Metabolism	20694	LC/MS Neg	100000841	603	88.988	971	144-62-7	C00209	HMDB02329	1.1044	1.1606	1.1388	0.7439	1.3568	0.9111	1.5235	1.1464	1.0493	1.0047	0.9978	1.0022	0.9673	1.5053	0.9581	0.852	0.8264	0.9484	0.8859	0.6664	0.9291	0.8221	1.4013	1.3237	1.0395	0.8441	0.691	1.2884	0.8423	0.9463	1.0757	0.8273	1.2932	1.0909	1.1492	0.973	1.3217
1362	palmitate (16:0)	Lipid	Long Chain Saturated Fatty Acid	1336	LC/MS Neg	424	5618	255.233	985	57-10-3	C00249	HMDB00220	0.996	0.9309	0.8461	0.8222	1.1533	0.5984	0.5199	1.3001	0.6475	0.6526	0.6054	0.51	0.7891	0.8806	1.021	1.3965	1.3037	0.857	0.6754	1.1204	2.0076	1.9464	1.1506	1.4121	1.004	1.3961	1.9614	0.7499	2.0693	1.6834	0.8669	1.249	1.8734	1.6871	1.6243	0.909	0.5544
1376	palmitoleate (16:1n7)	Lipid	Long Chain Monounsaturated Fatty Acid	33447	LC/MS Neg	452	5475	253.217	445638	373-49-9	C08362	HMDB03229	0.9699	1.7697	0.4542	0.7021	0.6924	0.3327	0.2788	1.3484	0.9884	1.0196	0.8166	0.5171	0.9908	0.7381	1.0092	2.2407	3.3504	1.4004	0.8796	2.5596	3.1899	2.9759	0.6984	0.8049	0.5012	2.0346	3.4033	1.11	4.3429	3.1639	0.5481	1.379	3.0693	3.2472	2.7688	0.6626	0.3619
1686	palmitoleoylcarnitine (C16:1)*	Lipid	Fatty Acid Metabolism (Acyl Carnitine, Monounsaturated)	53223	LC/MS Pos Late	100009406	1357	398.327	71464547				0.2553	0.2553	0.645	1.0709	1.1776	0.2553	0.387	1.9302	0.2553	1.0227	1.5491	0.5773	0.2553	2.8697	2.4683	0.9773	2.2528	0.825	0.4819	2.6287	0.2553	0.2553	0.2553	0.637	1.0332	0.2553	0.2553	0.6096	0.2553	0.2553	0.2553	0.2553	0.2553	0.446	0.2553	0.2553	0.2553
2813	palmitoyl dihydrosphingomyelin (d18:0/16:0)*	Lipid	Dihydrosphingomyelins	52434	LC/MS Pos Late	100008954	2290	705.591	9939965				0.8605	0.9408	0.8067	1.067	1.1653	0.9808	0.8998	1.1505	2.058	0.9971	0.85	0.6331	0.7273	0.9036	0.7823	1.0553	1.1644	1.3359	1.2326	1.2397	1.0493	0.6385	0.6292	0.9472	1.1779	1.0719	1.0029	1.9602	1.6712	1.023	1.3206	0.8659	0.8316	1.0145	0.6726	1.9798	0.8625
2817	palmitoyl sphingomyelin (d18:1/16:0)	Lipid	Sphingomyelins	37506	LC/MS Pos Late	100002107	2168	703.575	9939941	6254-89-3			1.0396	1.039	0.8569	0.9905	1.0522	0.9467	1.1068	1.145	1.0692	1.0553	1.0095	0.8712	0.764	1.059	0.8946	1.078	1.1109	1.0155	1.0578	1.0599	1.2539	0.9197	0.7394	1.0607	1.1431	0.9587	0.9756	1.3776	0.9889	0.9705	1.1017	0.9177	0.9361	0.8644	0.877	1.3115	0.867
2639	palmitoyl-arachidonoyl-glycerol (16:0/20:4) [1]*	Lipid	Diacylglycerol	54957	LC/MS Pos Late	100010924	2916	634.54				HMDB07112	1.2977	2.5853	0.8787	1.2329	2.4367	0.7503	0.8095	1.196	0.5752	0.6083	0.5778	0.5623	0.4171	0.8413	0.5852	1.137	1.3565	0.4462	0.4171	0.6309	1.5118	1.5269	1.6539	1.7449	1.0954	0.6428	1.1904	0.8321	1.4924	0.6033	1.094	2.2314	1.7032	0.9827	1.5016	1.6131	0.4767
2640	palmitoyl-arachidonoyl-glycerol (16:0/20:4) [2]*	Lipid	Diacylglycerol	54958	LC/MS Pos Late	100010925	3015	634.54				HMDB07112	1.3564	2.6445	0.5541	1.0782	2.2995	0.5931	0.8297	0.99	1.01	0.257	0.4624	0.4606	0.27	0.7362	0.5139	0.85	1.2743	0.257	0.257	0.257	2.0716	1.6479	1.4735	2.3064	1.4651	0.9016	0.951	0.6924	1.4411	0.7044	0.9111	2.5468	2.2013	2.0244	1.3363	1.354	0.257
1668	palmitoylcarnitine (C16)	Lipid	Fatty Acid Metabolism (Acyl Carnitine, Long Chain Saturated)	44681	LC/MS Pos Late	100000776	1425	400.342	461	6865-14-1	C02990	HMDB00222	0.7928	0.7904	1.152	1.5486	2.278	0.4405	0.7958	3.6455	0.9407	1.2385	1.8175	0.7447	1.1469	1.6874	2.4404	1.4449	3.3377	1.384	0.5595	1.9696	0.9935	0.7589	0.8783	1.0065	1.8547	0.7311	1.0435	0.8282	1.4207	0.8199	0.6137	1.0372	0.9484	1.3639	0.4574	1.0568	0.2897
1734	palmitoylcholine	Lipid	Fatty Acid Metabolism (Acyl Choline)	52944	LC/MS Pos Late	100009233	1482	342.337	151731				0.5067	1.0144	1.9699	0.5101	2.6144	0.3356	0.4613	0.5238	0.7197	1.624	0.1631	0.1631	0.2757	0.2421	0.1631	0.4032	0.1631	0.3242	0.774	0.2446	1.0358	0.9232	1.033	1.4472	0.6709	1.0798	1.0502	0.7156	1.1874	1.0275	0.5175	2.1509	0.6692	1.3229	1.092	1.8702	1
2632	palmitoyl-linoleoyl-glycerol (16:0/18:2) [1]*	Lipid	Diacylglycerol	52633	LC/MS Pos Late	100009052	3080	610.54	9543695			HMDB07103	2.0558	2.6344	0.8083	1.5722	2.2896	0.7512	0.4901	0.415	0.9483	0.2387	0.4978	0.5102	0.498	0.4499	0.5697	0.2603	0.6055	0.3296	0.4775	0.1702	3.8253	2.1914	1.8187	2.4068	1.7905	1.0517	1.1054	0.3299	1.1906	0.9431	1.1057	2.974	2.6494	2.8069	1.5528	1.724	0.6204
2633	palmitoyl-linoleoyl-glycerol (16:0/18:2) [2]*	Lipid	Diacylglycerol	52634	LC/MS Pos Late	100009055	3197	610.54				HMDB07103	2.2145	2.7621	0.6555	1.7018	2.1896	0.8339	0.4233	0.3933	0.9751	0.3025	0.5565	0.5023	0.462	0.5677	0.6141	0.2279	0.5496	0.2439	0.4026	0.2084	3.7037	2.1453	1.7863	2.2353	2.0076	1.106	1.138	0.4053	1.418	0.9229	1.0249	2.4582	2.6768	2.4844	1.4319	1.7623	0.5732
2630	palmitoyl-oleoyl-glycerol (16:0/18:1) [1]*	Lipid	Diacylglycerol	54943	LC/MS Pos Late	100010916	3562	612.556			C13861	HMDB07102	0.8635	3.8367	0.3599	0.8154	1.1316	0.3599	0.3599	0.3599	0.8104	0.3599	0.3599	0.3599	0.3599	0.3599	0.3599	0.3599	0.3599	0.3599	0.3599	0.3599	3.3134	0.3899	0.3599	0.3599	0.3599	0.3599	0.6577	0.3599	1.1932	0.3599	0.3599	2.3555	2.9192	2.3725	0.6666	0.8684	0.3599
2631	palmitoyl-oleoyl-glycerol (16:0/18:1) [2]*	Lipid	Diacylglycerol	54942	LC/MS Pos Late	100010917	3695	612.556			C13861	HMDB07102	1.1655	3.3701	0.187	1.0548	1.3751	0.3573	0.187	0.187	1.3138	0.7093	0.187	0.2822	0.187	0.187	0.187	0.187	0.187	0.187	0.2833	0.187	3.0858	1.1665	0.6036	0.6807	0.3997	0.714	0.9452	0.3336	1.68	0.8176	0.3663	2.6188	2.6873	2.2621	1.3095	1.2895	0.187
2848	palmitoyl-sphingosine-phosphoethanolamine (d18:1/16:0)	Lipid	Ceramide PEs	62984	LC/MS Pos Late	100021162	2207	661.528					1.0899	1.0023	0.817	0.8048	0.7866	0.9484	0.9866	1.3658	1.2974	0.9917	0.719	0.6881	0.941	1.1549	0.6573	1.2551	1.3962	1.0002	1.1214	1.1792	1.0376	1.0717	0.904	0.8892	0.9998	1.0329	1.1143	2.0851	1.0748	1.0048	0.9113	0.7187	0.9362	0.8442	0.7873	1.6727	0.8798
3999	pantoate	Cofactors and Vitamins	Pantothenate and CoA Metabolism	63061	LC/MS Neg	100002613	1143	147.066	439251	470-29-1	C00522		0.99	0.7004	1.4528	0.8859	0.7787	2.2638	2.1495	0.5938	2.9436	1.4368	1.0816	1.4731	1.3744	0.9473	2.0809	1.1315	1.6278	1.5549	1.2891	1.3909	0.676	0.6604	0.8666	0.7766	1.028	1.0615	0.9876	0.7422	1.112	0.9412	0.7304	0.8415	0.6593	0.8922	0.6427	1.01	1.3026
4000	pantothenate (Vitamin B5)	Cofactors and Vitamins	Pantothenate and CoA Metabolism	1508	LC/MS Neg	1024	1498.7	218.103	6613	137-08-6	C00864	HMDB00210	1.3031	0.6563	0.597	0.4723	0.4018	1.4769	1.9851	1.5189	1.6245	1.5302	0.8784	1.3766	1.0756	0.8098	1.5722	0.8314	0.719	1.2267	0.9284	0.7234	1.1341	0.9009	0.9514	1.0135	0.6693	1.1005	0.8751	1.0143	0.9089	0.9764	0.6174	0.5166	0.8753	1.1834	1.1091	1.0892	1.2948
212	p-cresol glucuronide*	Amino Acid	Tyrosine Metabolism	48841	LC/MS Neg	100006191	2420	283.082	154035	17680-99-8		HMDB11686	0.3397	2.2756	20.837	0.0932	0.7064	4.1842	0.6164	0.2071	1.6043	0.2637	3.9903	5.3609	3.97	1.0657	0.6249	0.4954	0.126	0.8928	0.9343	0.0932	0.0932	0.0932	10.8248	0.3705	0.8002	0.0932	0.0932	0.2468	2.7787	0.0932	1.4102	2.7743	1.5492	4.0952	6.9534	0.5604	0.4097
4190	p-cresol sulfate	Xenobiotics	Benzoate Metabolism	36103	LC/MS Neg	100001315	2890	187.007	4615423	3233-57-7		HMDB11635	0.0725	0.9425	6.7422	0.1801	1.1907	3.3842	1.4245	0.3004	2.3991	0.9578	1.8846	1.727	0.9252	0.4538	0.6976	0.952	0.2087	1.517	1.095	0.0683	0.0405	0.1079	3.2307	0.4991	0.4727	0.1612	0.5327	0.629	2.1109	0.3763	1.5199	2.8086	1.1323	3.2145	1.1234	1.0422	2.2496
1350	pelargonate (9:0)	Lipid	Medium Chain Fatty Acid	12035	LC/MS Neg	437	4798	157.123	8158	112-05-0	C01601	HMDB00847	2.078	1.0082	0.9918	1.4515	0.3501	0.849	0.7265	0.8698	0.7451	0.6839	1.684	2.1374	1.2985	3.0131	2.4807	0.8663	1.313	0.9113	0.859	1.1119	1.1317	1.7181	1.6646	0.75	1.4385	1.027	2.273	0.6638	1.1021	0.9004	1.4423	0.9882	2.8741	0.9369	0.9015	1.3349	0.9779
1361	pentadecanoate (15:0)	Lipid	Long Chain Saturated Fatty Acid	1361	LC/MS Neg	980	5521	241.217	13849	1002-84-2;10002-84-2	C16537	HMDB00826	1.1573	0.8947	0.9288	0.9426	0.9986	0.9359	0.7916	1.0556	0.9307	0.874	0.8366	0.8493	0.9265	1.1513	0.9192	1.0412	0.9705	1.0014	0.9904	0.9498	1.2641	1.2708	1.2179	1.2091	1.1393	1.12	1.3331	0.9137	1.1379	1.1901	1.0019	1.0668	1.2314	1.2734	1.0795	0.9502	0.8983
5620	pentose acid*	Partially Characterized Molecules	Partially Characterized Molecules	63264	LC/MS Polar	100021467	2180	165.041					1.197	0.8055	1.0291	1.1979	0.8076	1.1447	1.3489	0.5856	1.818	1.0407	0.2945	0.3156	0.5102	0.3613	0.3975	0.7084	0.5559	0.6996	0.999	0.9035	0.9025	1.1896	1.1794	0.8936	1.2655	1.1392	1.0404	1.1388	1.4093	1.3903	1.001	0.6726	0.6648	1.1484	0.9287	1.249	0.9782
177	phenol sulfate	Amino Acid	Tyrosine Metabolism	32553	LC/MS Neg	100001510	2156	172.991	74426	937-34-8	C02180	HMDB60015	0.1082	1.3202	2.606	1.1235	1.7353	3.89	0.3785	0.809	0.5708	0.829	1.5511	0.1785	1.2154	2.4668	2.4903	0.4556	0.5542	1.3841	0.5655	2.3859	0.1921	0.3383	3.4779	0.8651	1.6996	2.2761	0.2377	1.6308	2.9936	0.6645	0.5481	1.5564	1.6013	1.6181	0.5113	0.8765	0.1799
147	phenylacetate	Amino Acid	Phenylalanine Metabolism	57745	LC/MS Neg	100000011	2150	91.0554	999	103-82-2	C07086	HMDB00209	1.2115	0.4695	6.6068	1.5143	0.383	1.7325	0.707	0.2092	1.636	0.6975	1.7664	2.16	0.7885	3.0404	0.4133	0.671	0.2092	0.6537	0.489	0.4812	0.3099	0.5082	3.2066	0.4681	0.4143	2.3657	0.6989	0.6175	1.3325	0.3464	1.4741	3.5844	1.2296	1.9059	3.0989	0.4999	2.3338
1055	phenylacetylcarnitine	Peptide	Acetylated Peptides	48425	LC/MS Pos Early	100006108	3092	280.154	101724840	287108-21-8			0.2745	0.4164	1.1629	1	0.2328	0.2328	0.2328	0.2328	0.2328	0.2328	0.348	0.9131	0.2328	2.7359	0.2328	0.2328	0.2328	0.2328	0.2328	0.2328	0.2328	0.2328	1.5405	0.2328	0.2328	0.2328	0.2328	0.2328	0.2328	0.2328	0.3061	2.6938	0.6266	1.1869	1.7222	0.2328	1.2087
132	phenylalanine	Amino Acid	Phenylalanine Metabolism	64	LC/MS Pos Early	460	2878	166.086	6140	63-91-2	C00079	HMDB00159	1.0109	1.0722	0.7148	0.8505	1.1395	0.9112	1.0803	0.7041	0.8486	0.8657	0.9812	0.9494	0.9747	0.9891	1.0376	0.9081	0.8987	1.0525	1.1869	0.8678	1.1808	1.2374	1.1829	1.0986	0.9699	1.1062	1.0165	0.9382	1.1618	1.082	1.2864	1.2774	0.9752	1.1365	1.0452	0.864	0.9799
856	phenylalanylhydroxyproline*	Peptide	Dipeptide	63039	LC/MS Neg	100021238	2225	277.119				HMDB28996,HMDB11176	0.8983	1.0309	0.5112	0.7021	0.6068	1.1131	1.5822	1.2262	1.013	1.0336	1.1947	0.9789	1.2107	0.987	1.2083	1.5565	1.6746	1.7197	1.6732	1.8655	1.2603	0.9166	0.5637	0.8667	1.1466	0.9324	1.0377	1.2709	1.185	1.0455	0.8334	0.3851	0.873	0.4443	0.5528	0.3638	0.5049
143	phenyllactate (PLA)	Amino Acid	Phenylalanine Metabolism	22130	LC/MS Neg	100000774	2208	165.056	3848	828-01-3	C05607	HMDB00779	0.8692	1.314	2.5145	0.5565	1.0088	0.8817	0.4594	0.1593	0.3398	0.2435	1.1845	2.2385	1.136	0.9912	0.3442	0.7334	0.3661	1.9316	0.3955	0.283	0.4882	0.4048	1.8455	0.3159	0.656	1.494	0.4213	0.7397	1.3515	0.5323	3.1305	1.1911	4.6708	2.9348	3.137	2.5377	4.3335
142	phenylpyruvate	Amino Acid	Phenylalanine Metabolism	566	LC/MS Neg	241	2515	163.04	997	156-06-9	C00166	HMDB00205	2.1638	2.0141	0.748	0.7442	0.5273	1.0024	1.8953	0.435	1.9135	0.6651	1.0737	1.0137	1.5855	0.9281	2.03	1.3157	0.9976	1.6305	1.6619	0.4693	1.075	1.3856	0.7075	0.6191	1.4935	0.8684	0.2332	0.2332	0.2332	0.7137	2.1159	0.7566	0.6782	0.2781	1.3044	0.4399	0.2332
1329	phosphate	Energy	Oxidative Phosphorylation	42109	LC/MS Pos Early	461	576	98.9842	1061	7664-38-2	C00009	HMDB01429	1.2017	0.7861	0.3942	0.9137	1.0633	1.0161	0.7214	1.0009	0.6952	0.6287	1.0114	1.1236	0.5995	1.8324	1.5053	1.2887	0.9781	1.1595	0.2667	0.7596	1.2999	1.6336	1.7491	1.3945	2.7237	0.8131	0.9991	0.6317	1.2209	0.8478	1.1282	0.9063	1.4552	1.1871	1.1259	0.7548	0.8127
2003	phosphoethanolamine (PE)	Lipid	Phospholipid Metabolism	1600	LC/MS Neg	1026	638	140.012	1015	1071-23-4	C00346	HMDB00224	1.0982	1.1611	0.5926	0.8264	1.0897	0.3854	1.3698	1	0.7342	0.8828	1.4045	1.6239	1.2597	2.2678	1.5653	0.9738	0.8599	0.7337	0.5406	1.3391	1.1457	0.8395	1.616	1.141	0.9384	0.7933	0.7561	0.8744	0.5974	0.8305	1.0567	0.9841	1.0754	1.1431	1.8129	1.1951	0.8199
259	picolinate	Amino Acid	Tryptophan Metabolism	1512	LC/MS Pos Early	1022	910	124.039	1018	98-98-6	C10164	HMDB02243	1.4856	0.9802	1.162	0.7017	0.8904	1.4857	1.0438	0.6872	1.062	0.5553	0.6144	0.6473	0.7766	0.8889	1.2875	1.4232	1.3591	0.9042	1.1722	0.8251	0.8481	1.3252	0.8411	1.0631	0.9	1.2189	1.0107	1.0172	0.7342	1.2524	1.7662	1	0.5553	1.6963	0.5575	1.2195	0.6743
1516	pimelate (C7-DC)	Lipid	Fatty Acid, Dicarboxylate	15704	LC/MS Polar	100000101	2745	159.066	385	111-16-0	C02656	HMDB00857	1.1719	1.3814	1.4101	0.5072	0.7768	0.8358	0.7778	0.4683	0.7419	0.326	0.326	0.326	0.8035	0.5284	0.5376	0.6895	1.2641	0.593	0.8969	0.6905	1.5207	0.6036	2.7597	1.6837	4.2104	1	1.0688	0.326	1.0131	1.518	1.5481	1.7229	1.6348	1.6772	3.1526	1.8905	0.7066
123	pipecolate	Amino Acid	Lysine Metabolism	1444	LC/MS Pos Early	1025	2200	130.086	849	4043-87-2	C00408	HMDB00070	0.9352	0.8047	0.9606	1.3207	1.3483	1.4687	1.2546	0.9431	1.3047	1.1026	0.967	0.9904	1.0981	1.3806	1.1948	0.9353	0.6602	1.1401	0.7268	0.6382	0.9854	1.1369	1.6559	0.8772	0.7461	0.5459	0.7864	0.57	0.6191	0.6216	1.4179	1.3389	1.0096	1.565	1.2534	1.1444	1.8044
454	prolylhydroxyproline	Amino Acid	Urea cycle; Arginine and Proline Metabolism	35127	LC/MS Pos Early	100001167	2128	229.118	11673055	18684-24-7		HMDB06695	0.6833	0.791	0.4094	0.6868	0.7197	0.8463	1.4026	1.4233	0.9044	1.2673	1.0486	0.786	1.1849	0.8085	0.9794	1.7121	1.4492	1.3874	1.2442	1.4515	1.2262	0.8001	0.7679	1.0023	0.9977	1.1427	1.1331	1.3912	1.6207	1.2539	1.0042	0.901	0.8971	0.6836	0.9286	1.0352	0.8888
436	proline	Amino Acid	Urea cycle; Arginine and Proline Metabolism	1898	LC/MS Pos Early	480	1603	116.071	145742	147-85-3	C00148	HMDB00162	1.0603	1.008	0.6932	0.9231	0.724	1.0509	1.1626	0.6811	1.0482	0.9165	1.042	0.7797	1.0014	1.0095	0.9376	0.9986	1.0358	0.9435	0.9227	0.8151	1.0614	1.2104	0.8592	1.053	0.8327	1.0214	0.8018	0.8111	0.9757	0.9398	1.257	1.0328	1.071	1.3387	1.0709	0.848	1.0491
869	prolylglycine	Peptide	Dipeptide	40703	LC/MS Pos Early	100003674	2136	173.092	6426709	2578-57-6		HMDB11178	1.5904	0.5118	1.0066	1.5685	0.8562	0.9149	0.8767	0.2094	0.8636	0.4727	1.632	1.3037	1.8262	0.8106	2.1025	1.9295	1.1926	1.4529	3.4385	1.2653	0.5394	1.1407	0.8906	0.7193	0.2094	0.9934	0.2094	0.2094	0.3368	1.1089	0.9859	0.2094	0.2094	1.2441	0.2094	0.2094	0.4313
1614	propionylcarnitine (C3)	Lipid	Fatty Acid Metabolism (also BCAA Metabolism)	32452	LC/MS Pos Early	100001162	2590	218.139	107738	17298-37-2	C03017	HMDB00824	1.1818	1.3872	0.7864	0.997	1.003	1.2359	0.3436	0.2737	0.4395	0.2249	1.4566	1.0187	1.3363	1.9405	1.7802	0.2614	0.4689	0.9	0.6365	0.4926	0.8625	1.5784	1.9966	0.7465	1.5924	0.3059	0.911	0.3832	0.5966	0.7806	3.0781	0.9073	1.5193	3.4083	1.3299	2.8123	2.1592
3894	pseudouridine	Nucleotide	Pyrimidine Metabolism, Uracil containing	33442	LC/MS Neg	821	1100	243.062	15047	1445-07-4	C02067	HMDB00767	0.7848	1.1889	0.5661	1.2436	1.2702	0.854	0.7685	0.8974	0.7803	0.6565	0.6803	0.6889	1.5887	1.3521	0.8438	1.0405	1.1357	0.8722	0.6462	1.1988	0.7438	0.8765	1.4224	1.0572	0.89	1.1982	1.3032	1.0991	0.7364	1.2937	1.052	1.0269	1.0906	0.9831	2.0222	0.9577	0.9668
475	putrescine	Amino Acid	Polyamine Metabolism	1408	LC/MS Pos Early	49	3027	89.1073	1045	110-60-1	C00134	HMDB01414	1.0176	1.8019	1.3085	0.9828	3.5693	0.908	0.5901	1.2537	0.5238	0.6421	0.5904	0.5269	0.7882	1.5322	1.0172	1.2632	1.0888	1.064	0.8667	1.2963	0.6317	0.927	2.2957	0.7151	0.9586	1.9925	2.7687	3.2559	2.2572	2.0931	0.3724	0.6674	0.7714	0.1887	0.7937	1.6897	1.0428
4108	pyridoxal	Cofactors and Vitamins	Vitamin B6 Metabolism	1651	LC/MS Neg	491	1534.9	166.051	1050	65-22-5	C00250	HMDB01545	0.7241	0.5989	1.0451	1.8988	0.83	1.4263	1.4809	1.2445	1.4449	1.5778	1.7271	1.6688	0.7812	0.6466	1.8118	1.6267	0.8458	2.2695	0.586	1.3995	0.8072	1	0.846	0.9525	1.1371	0.4624	0.4624	0.6214	0.5998	0.4624	0.6991	0.6697	0.4624	0.4624	1.3899	0.4955	1.4003
4105	pyridoxamine	Cofactors and Vitamins	Vitamin B6 Metabolism	2150	LC/MS Pos Early	568	2975	169.097	1052	58052-48-5	C00534	HMDB01431	1.3023	0.413	0.413	0.989	0.413	1.4839	1.0571	0.6918	0.413	0.7753	1.1169	0.75	0.413	0.413	1	0.413	0.413	2.3244	0.413	0.413	3.4307	0.413	1.0071	0.8121	0.413	0.8773	0.759	0.413	1.871	0.9387	1.4539	1.0874	0.413	0.4449	0.413	1.0814	1.0618
4109	pyridoxate	Cofactors and Vitamins	Vitamin B6 Metabolism	31555	LC/MS Neg	100001121	2185	182.046	6723	82-82-6	C00847	HMDB00017	0.7563	1.9938	4.3052	1.0558	0.7868	0.9895	1.0777	0.5081	1.4181	0.4853	0.9436	0.6838	1.9802	1.2825	1.1716	0.4924	1.0414	1.0728	0.7856	1.3249	1.5086	0.5233	2.4034	0.8925	2.1827	1.1268	0.6513	0.5488	0.941	0.8008	1.0105	0.8828	0.9824	1.1618	1.602	0.9453	0.894
52	pyroglutamine*	Amino Acid	Glutamate Metabolism	46225	LC/MS Pos Early	100001540	1900	129.066	134508	2353-44-8			1.9824	1.4536	0.7018	1.3682	0.9389	0.6661	0.7822	0.8936	0.8349	0.7212	1.8359	4.5836	3.1938	1.8215	3.3958	1.5393	0.9391	2.3505	0.7123	0.6693	0.7003	1.0526	2.3524	1.2155	1.3117	0.3144	0.7854	0.7583	0.2566	0.6973	1.6522	0.9474	1.9556	1.1392	1.7372	0.9412	1.4036
1109	pyruvate	Carbohydrate	Glycolysis, Gluconeogenesis, and Pyruvate Metabolism	48990	LC/MS Polar	823	1083	87.0088	1060	127-17-3	C00022	HMDB00243	1.3457	0.9151	0.5679	1.2884	0.6154	1.3319	0.5474	1.4151	0.846	0.9801	1.1248	0.8438	0.7542	1.0642	1.2995	1.2644	2.0041	1.413	0.8221	1.0199	1.2771	1.0676	0.4328	0.6332	0.8579	0.6097	1.3606	1.0667	1.2572	1.2286	0.7397	0.896	1.456	0.9226	1.3621	0.7844	0.6182
4487	quinate	Xenobiotics	Food Component/Plant	18335	LC/MS Polar	100000442	2432.9	191.056	6508	77-95-2	C00296	HMDB03072	1.2488	1.6025	1.1593	0.9413	0.9543	1.0931	1.109	0.2505	1.4696	0.6969	0.328	0.2782	0.3769	0.6135	0.129	0.3045	0.593	0.5497	1.0733	0.7779	1.3888	1.2058	1.6766	1.0749	2.2043	1.386	1.1134	0.8558	1.9774	1.5079	0.6386	0.7583	1.0457	0.8714	1.2684	2.1798	0.8969
3967	quinolinate	Cofactors and Vitamins	Nicotinate and Nicotinamide Metabolism	1899	LC/MS Pos Early	182	845	168.029	1066	89-00-9	C03722	HMDB00232	0.6429	0.4755	1.0158	1.0675	0.3989	1.9759	0.9992	1.0008	1.4571	0.7522	0.7287	0.7119	0.905	0.5178	0.86	1.6056	4.8665	1.4032	1.471	2.4452	0.5286	0.7108	0.4774	0.8118	0.8423	1.3845	2.013	1.9754	1.2505	2.3526	1.4998	0.8847	0.6757	0.9442	1.3249	1.6676	0.7411
1202	raffinose	Carbohydrate	Disaccharides and Oligosaccharides	586	LC/MS Neg	879	978	503.162	10542	17629-30-0	C00492	HMDB03213	1.529	0.4196	0.6146	1.8271	0.6997	1.0392	1.0802	0.3327	1.5421	0.8186	0.7779	0.3905	1.1002	0.7741	1.4735	1.3067	1.0485	1.0567	1.3756	1.0826	0.701	0.8998	1.0095	0.704	0.5922	0.8127	1.0113	0.7857	1.1628	0.9905	1.5617	0.9389	0.4317	1.0192	0.4293	1.9851	0.8758
4095	retinal	Cofactors and Vitamins	Vitamin A Metabolism	40807	LC/MS Pos Late	100004088	1666	285.221	638015		C00376	HMDB01358	1.7173	1.2224	0.3318	1.4124	0.9919	1.129	1.398	1.227	1.9417	1.117	0.4095	0.6578	0.5138	0.903	0.957	0.617	0.6313	0.8622	1.1975	0.8659	1.639	1.6375	1.0318	1.7442	1.8259	1.2756	1.0899	0.9604	1.4246	1.0935	0.7162	0.782	1.0081	1.4408	0.7704	0.8241	0.5217
4088	retinol (Vitamin A)	Cofactors and Vitamins	Vitamin A Metabolism	1806	LC/MS Pos Late	498	1636	269.226	445354	68-26-8	C00473	HMDB00305	1.6352	0.9155	0.6744	1.7062	1.3787	1.8922	2.3369	2.1189	3.2098	2.7126	0.623	0.8758	0.94	0.49	1.4242	0.8883	0.9603	1.3739	1.1984	1.0921	1.8748	1.5295	0.9859	1.3709	1.6198	1.0895	0.9841	0.953	1.3045	0.877	0.8134	1.0141	0.962	1.1236	0.5699	0.9199	0.6068
1132	ribitol	Carbohydrate	Pentose Metabolism	15772	LC/MS Polar	100000406	1789.6	151.061	6912	488-81-3	C00474	HMDB00508	1.0975	1.0737	0.6484	0.7362	0.9179	0.8326	0.7595	0.7393	0.616	0.5593	0.7798	0.8575	0.8689	0.9715	0.74	0.8253	0.8415	0.9585	1.0227	0.7337	1.5642	0.9978	1.9241	0.8261	1.2033	1.1214	1.1362	0.9439	1.186	1.3972	1.8222	1.1666	1.8835	1.1818	2.5819	1.2092	1.468
1133	ribonate	Carbohydrate	Pentose Metabolism	27731	LC/MS Polar	100001007	2425	165.041	5460677	5336-08-03	C01685	HMDB00867	0.5676	1.3015	1.133	1.1512	0.4934	0.9505	0.9766	0.8277	1.0523	0.8736	0.8302	0.7504	0.9288	1.033	0.7483	0.949	0.9025	0.9242	0.9957	1.0043	1.1208	0.992	1.2506	0.9533	1.0453	0.9332	1.0706	1.2561	1.318	1.0695	1.005	0.7449	0.8848	1.1027	1.1149	1.2592	1.13
1157	ribulonate/xylulonate/lyxonate*	Carbohydrate	Pentose Metabolism	61858	LC/MS Polar	100019968	2350	165.041					1.0964	0.8592	0.9302	0.7572	0.7871	0.7143	1.217	0.8358	0.8998	0.9336	1.3345	1.2677	1.0034	1.4147	1.2075	0.6031	0.7344	0.8895	0.7412	0.6705	1.3511	1.2191	0.99	1.0984	1.6852	0.7035	0.8003	1.1769	0.9966	1.0516	1.2492	0.7885	1.0686	1.712	1.2511	1.0749	1.0609
5417	S-(3-hydroxypropyl)mercapturic acid (HPMA)	Xenobiotics	Chemical	44552	LC/MS Neg	100004568	1576	220.065	3371179	23127-40-4			1.0251	0.9121	1.3486	1.2787	1.0186	0.9822	1.165	0.3757	1.4655	0.8816	0.3365	0.2521	0.8002	0.2471	0.8454	0.841	1.4927	0.7445	1.1803	1.2346	1.572	1.0426	0.8352	0.8262	0.9926	0.8759	1.5056	0.8027	1.1654	1.4607	1.6875	1.1997	0.8517	0.7703	1.0074	1.7268	0.8056
60	S-1-pyrroline-5-carboxylate	Amino Acid	Glutamate Metabolism	42370	LC/MS Pos Early	35	1528	114.055	1196	2906-39-0	C04322	HMDB01301	2.0698	1.3035	4.5094	0.9213	1.2271	1.0249	0.9539	0.9067	0.9005	0.8101	1.0084	0.766	0.7342	2.7411	0.6902	1.351	0.6311	0.7878	0.5982	0.5053	0.7554	1.8871	1.1944	0.9916	0.8437	1.3866	1.0942	0.667	0.8239	0.9903	1.3598	0.8379	0.9246	1.5141	1.5095	1.3298	1.0906
392	S-adenosylhomocysteine (SAH)	Amino Acid	Methionine, Cysteine, SAM and Taurine Metabolism	42382	LC/MS Neg	197	1832.4	383.114	439155	979-92-0	C00021	HMDB00939	0.8909	0.9224	1.3196	1.0642	0.5932	1.1882	1.3534	0.9112	1.1883	1.0291	0.9632	0.813	0.8293	1.5143	0.9479	1.9314	1.0145	1.5661	1.7999	1.4844	0.7711	1.009	0.3657	1.0173	0.688	1.1598	1.073	3.0009	0.8742	1	0.8539	0.9109	0.6749	0.8705	0.8032	0.1946	1.13
5285	salicylate	Xenobiotics	Drug - Topical Agents	1515	LC/MS Neg	501	2195	137.024	338	69-72-7	C00805	HMDB01895	1.2466	0.783	2.1333	0.9349	0.6206	0.8482	1.004	0.2498	1.1023	0.7103	0.3086	0.3972	0.6451	0.2946	0.4316	0.3382	0.765	0.7036	1.6056	0.8278	0.6206	0.8444	1.3017	1.0507	1.1372	1.7153	1.106	0.996	1.338	1.0557	1.2598	1.7402	1.2584	1.0239	0.5709	1.2335	1.0359
4	sarcosine	Amino Acid	Glycine, Serine and Threonine Metabolism	1516	LC/MS Pos Early	1023	1280	90.055	1088	107-97-1	C00213	HMDB00271	1.5565	1.4069	1.712	0.9113	1.1391	1.0291	1.2293	0.5829	1.4408	0.9334	1.2495	1.2679	0.9709	1.0988	1.1308	0.6568	0.4338	0.5647	0.5105	0.282	1.2144	1.1427	0.956	1.1509	1.0799	0.5939	0.6225	0.4175	0.5386	0.6129	1.7849	0.9261	1.1964	1.487	1.4537	0.6852	1.1714
1524	sebacate (C10-DC)	Lipid	Fatty Acid, Dicarboxylate	32398	LC/MS Neg	100001211	1788	201.113	5192	111-20-6	C08277	HMDB00792	0.321	0.321	1.8241	0.321	0.321	0.321	0.828	2.7723	0.321	0.321	0.577	0.321	0.8196	0.321	1	2.6153	9.2894	1.1508	0.9559	1.716	0.6832	0.321	0.9845	0.8281	1.1262	0.321	0.8426	1.0335	0.321	0.742	1.1424	0.321	0.7878	1.1328	1.2	1.535	0.321
1156	sedoheptulose	Carbohydrate	Pentose Metabolism	53237	LC/MS Polar	100002619	2255	209.067	5459879	3019-74-7		HMDB03219	0.6617	1.0134	0.6153	0.4479	0.9233	1.0394	0.8579	1.2499	0.9001	0.7369	0.6986	1.246	1.2415	1.1077	0.6793	0.5827	1.0531	0.7418	0.6509	0.5407	1.6475	1.4384	1.5195	1.1655	0.9866	0.7951	0.9259	0.7223	1.2241	1.298	1.0944	1.1884	0.9231	1.5586	1.2919	0.8644	1.2582
9	serine	Amino Acid	Glycine, Serine and Threonine Metabolism	1648	LC/MS Pos Early	503	1239	106.05	5951	56-45-1	C00065	HMDB00187	0.9491	1.1649	0.6687	1.1433	1.1618	0.8894	1.1963	0.9085	0.8282	0.783	1.4228	1.572	1.0593	1.8047	1.4396	1.0001	0.9509	0.7117	0.6971	0.8696	1.5179	0.9695	1.417	1.1826	0.9999	0.6412	0.9133	0.8306	0.7127	0.8547	0.8622	1.0793	1.1022	1.1613	1.3208	1.1046	0.9409
264	serotonin	Amino Acid	Tryptophan Metabolism	2342	LC/MS Pos Early	504	2550	177.102	5202	153-98-0	C00780	HMDB00259	1.1115	0.6385	0.7888	0.8724	0.8971	1.4734	1.2405	1.9395	1.7974	1.368	1.2067	0.4816	0.697	0.3419	0.6926	0.6153	1.7589	1.0538	0.7677	1.0819	0.5884	0.9399	0.7394	1.0232	0.8334	0.9465	1.0026	0.2408	0.9836	1.0658	0.8406	0.9181	1.3142	1.5155	1.0393	0.9974	1.0374
403	S-methylcysteine	Amino Acid	Methionine, Cysteine, SAM and Taurine Metabolism	39592	LC/MS Neg	100002749	880	134.028	24417	1187-84-4		HMDB02108	1.2039	1.17	1.945	0.9872	1.2579	0.9228	1.2515	1.2978	0.8681	0.9275	0.6425	0.7123	1.6409	2.1707	1.4819	0.9984	0.9912	0.6751	1.738	1.1593	0.9726	1.2192	2.0071	1.0385	0.5989	1.0754	0.7635	1.5595	1.0839	0.7597	0.6183	1.5388	0.4027	2.7128	0.9432	0.7487	0.5859
404	S-methylcysteine sulfoxide	Amino Acid	Methionine, Cysteine, SAM and Taurine Metabolism	43378	LC/MS Pos Early	100002927	900	152.038	82142	6853-87-8		HMDB29432	1.1132	0.8147	1.188	0.8539	1.2431	1.5046	1.5894	1.4941	1.3712	1.3415	1.3478	1.7346	1.6657	1.8992	1.1684	1.0298	0.7282	0.6391	1.1081	0.8659	0.8621	1.2133	1.794	0.7257	0.8344	1.0189	0.8643	0.7417	0.8264	0.6971	0.742	0.9811	0.5732	2.3236	1.3673	0.5836	0.8047
384	S-methylmethionine	Amino Acid	Methionine, Cysteine, SAM and Taurine Metabolism	38127	LC/MS Pos Early	100002183	2555	164.074	458	3493-12-07	C05319	HMDB38670	1.0267	2.7039	0.7884	0.8973	0.9512	0.1402	0.6296	0.1402	0.7209	0.1402	0.463	0.2528	0.6617	0.4945	0.1402	0.1402	0.1402	0.1402	2.0281	0.1402	1.113	1.6223	0.8407	1.1996	1.1703	1.8788	0.7882	1.0478	3.0212	1.3786	0.7654	1.9683	1.1613	1.5893	1.3455	0.4113	0.4208
482	spermidine	Amino Acid	Polyamine Metabolism	485	LC/MS Pos Early	50	3355	146.165	1102	124-20-9	C00315	HMDB01257	1.2926	0.885	1.261	0.4434	1.3156	0.7471	0.2718	0.6217	0.1272	0.329	0.8824	0.4491	0.3377	1.1665	0.4881	0.8761	0.4237	0.2532	0.407	0.497	0.8401	1.426	2.1981	1.1925	1.1107	1.6873	2.3282	1.8821	1.85	1.9432	0.7738	0.9941	0.8995	1.0059	1.1316	2.1309	2.0128
489	spermine	Amino Acid	Polyamine Metabolism	603	LC/MS Pos Early	507	3350	203.223	1103	71-44-3	C00750	HMDB01256	1.5607	0.4234	2.2208	0.131	1.0459	0.9785	0.0876	0.3959	0.0672	0.1663	0.2231	0.2443	0.1322	2.2617	0.0752	0.3399	0.0567	0.0402	0.2334	0.201	0.3891	1.5547	2.7578	1.0215	1.1888	2.4743	2.0291	0.5756	1.3474	2.9086	0.9178	1.0323	0.7757	1.4236	1.231	4.2141	1.9641
2722	sphinganine	Lipid	Sphingolipid Synthesis	17769	LC/MS Pos Late	313	1413	302.305	3126	3102-56-5	C00836	HMDB00269	0.3691	0.3872	0.5087	0.497	0.629	0.4143	0.217	0.6363	0.3236	0.217	0.217	0.217	0.217	0.3229	0.3288	0.4651	0.5058	0.217	0.217	0.217	2.331	0.962	1.1241	1.3064	0.8068	1.2403	1.3051	1.7262	2.2567	1.3139	1	1.6892	1.0885	1.7062	2.5508	3.4126	1.4977
2723	sphinganine-1-phosphate	Lipid	Sphingolipid Synthesis	52605	LC/MS Pos Late	100001876	1431	382.272	520	19794-97-9		HMDB01383	0.7272	0.8765	0.8472	0.7745	1.1168	0.9791	0.9483	0.7803	1.0209	0.6026	0.1244	0.286	0.1878	0.3716	0.3523	0.2394	0.2065	0.2692	0.2104	0.3111	3.4717	1.0652	1.2362	0.7945	1.161	1.4259	1.5301	1.5484	1.6578	1.4252	2.8201	3.3708	0.7937	1.0623	1.7583	4.3222	1.9709
2829	sphingomyelin (d17:1/16:0, d18:1/15:0, d16:1/17:0)*	Lipid	Sphingomyelins	52433	LC/MS Pos Late	100006314	2082	689.559		121999-58-4			1.5878	1.4084	1.1022	1.1677	1.0551	1.421	1.151	1.0932	1.9921	1.1879	0.7704	0.8372	0.7294	0.8599	0.9725	0.8196	1.0048	1.1941	0.9189	1.1419	1.6548	1.0655	0.7159	1.1066	1.3211	0.8677	0.9747	1.5682	0.8538	0.7767	1.2566	0.7791	0.9651	0.9952	0.7788	1.5881	0.6984
2815	sphingomyelin (d18:0/18:0, d19:0/17:0)*	Lipid	Dihydrosphingomyelins	57473	LC/MS Pos Late	100009027	2362	733.622				HMDB12087	0.6563	0.7701	0.6961	1.0094	1.5188	0.6392	1.004	1.4056	1.6597	0.753	1.0812	0.7857	1.0412	1.5527	0.996	1.3773	0.9442	1.4113	1.0155	1.2398	0.9088	0.5976	0.3946	0.9103	1.2222	1.0731	0.7825	1.9792	1.5791	0.9151	1.2157	0.8441	0.5837	0.7581	0.5151	1.9226	1.1849
2827	sphingomyelin (d18:1/14:0, d16:1/16:0)*	Lipid	Sphingomyelins	42463	LC/MS Pos Late	100004328	1998	675.544	11433862			HMDB12097	1.4058	0.9888	0.6385	1.1377	0.9137	0.9247	1.0788	0.9782	1.2437	1.1779	0.5089	0.5878	0.5514	0.6634	0.6521	1.0357	1.1657	1.0112	1.2435	1.1857	1.5767	1.1466	0.6753	0.9548	1.102	1.0153	1.0683	1.6754	1.1445	0.9509	1.0983	0.694	0.7761	1.022	0.8877	1.3991	0.6001
2832	sphingomyelin (d18:1/17:0, d17:1/18:0, d19:1/16:0)	Lipid	Sphingomyelins	52615	LC/MS Pos Late	100008920	2312	717.591		121999-64-2			1.4457	1.2014	1.2304	1.0156	1.1445	1.1942	1.2023	1.5895	1.2474	1.0646	0.9177	0.7962	0.7865	0.9627	1.1781	0.9711	0.9534	0.9563	0.9124	1.0374	1.6361	0.9844	0.7868	1.4117	1.9136	0.8359	0.8591	1.2574	0.7546	0.6982	1.3616	0.8518	1.0639	1.051	0.7959	1.3288	0.6267
2833	sphingomyelin (d18:1/18:1, d18:2/18:0)	Lipid	Sphingomyelins	37529	LC/MS Pos Late	100002106	2167	729.591	6443882	108392-10-5		HMDB12101	0.7317	0.7626	0.817	1.0562	0.8484	1.2501	1.3223	1.4191	0.9524	1.2761	0.8978	0.8686	1.0161	1.286	0.955	1.247	1.3052	1.5797	1.3262	1.8441	0.9839	0.7869	0.6521	0.8276	0.8332	1.2338	1.1788	1.6083	1.4538	1.1902	0.7503	0.7934	0.7644	0.6597	0.884	1.6031	0.8197
2834	sphingomyelin (d18:1/19:0, d19:1/18:0)*	Lipid	Sphingomyelins	57475	LC/MS Pos Late	100015787	2330	745.622					1.681	1.6351	1.4546	0.9922	1.3533	0.7721	1.2383	1.3282	0.9945	0.9564	1.1028	0.7109	0.8099	0.9803	1.2016	0.8851	0.8388	1.0649	1.0431	1.0401	1.3562	0.9748	0.7496	1.4256	1.7351	1.0605	1.0055	1.5664	0.7488	0.9382	1.3045	0.8873	1.0315	0.9247	0.7121	1.735	0.8871
2835	sphingomyelin (d18:1/20:0, d16:1/22:0)*	Lipid	Sphingomyelins	48490	LC/MS Pos Late	100006290	2685	759.638				HMDB12102	1.0186	1.2547	0.9408	0.8464	1.0822	0.8348	1.3029	1.4713	0.9379	1.0141	1.0472	0.9243	0.6986	1.0118	0.8691	1.1589	0.9882	1.1387	0.936	1.1255	1.1952	0.7998	0.6943	1.1146	1.2973	1.0483	0.8938	1.3434	0.9381	0.9418	1.1124	1.1846	0.9478	0.8848	0.8603	1.6623	0.9768
2836	sphingomyelin (d18:1/20:1, d18:2/20:0)*	Lipid	Sphingomyelins	48491	LC/MS Pos Late	100006292	2383	757.622		222403-67-0			0.8051	0.4704	0.548	1.0786	1.0351	0.4704	1.5985	1.4091	0.4704	0.9018	1.042	0.6893	0.6008	0.7345	0.838	1.5421	1.1392	0.4704	1.3332	2.0011	0.4704	0.8215	0.4969	0.7833	1.0832	1.09	0.4704	2.062	0.6838	1	0.7142	0.4704	0.4704	0.4704	0.4704	1.0482	1.434
2837	sphingomyelin (d18:1/20:2, d18:2/20:1, d16:1/22:2)*	Lipid	Sphingomyelins	57481	LC/MS Pos Late	100006293	2039	755.606					0.7031	0.6678	1.3499	1.0378	1.0797	0.6678	1.5483	1.9868	0.6678	0.6678	0.8402	0.7855	1.0438	0.675	1.7317	1.1493	0.6678	0.6824	0.6678	1.4865	0.6678	1	0.6735	0.6696	1.809	0.9617	0.8467	0.6678	0.6678	0.7269	1.6219	0.6678	0.6678	0.6678	0.6678	0.7542	1.267
2838	sphingomyelin (d18:1/21:0, d17:1/22:0, d16:1/23:0)*	Lipid	Sphingomyelins	52495	LC/MS Pos Late	100009025	2793	773.653					0.8867	1.0666	1.0952	0.9823	1.0118	0.5817	1.3651	1.301	0.8013	1.1565	1.1123	0.6795	0.6967	0.9664	1.0538	1.093	0.828	1.1428	0.7704	1.332	1.0321	0.705	0.7105	1.2213	1.5351	0.9875	0.936	1.3681	0.8188	0.8387	1.1833	1.0804	0.7779	0.9882	0.6282	1.7012	1.0328
2840	sphingomyelin (d18:1/22:1, d18:2/22:0, d16:1/24:1)*	Lipid	Sphingomyelins	48493	LC/MS Pos Late	100006295	2666	785.653				HMDB12104	0.8152	0.9823	0.5514	0.9544	0.9819	0.7476	1.2378	1.3685	1.0058	1.5762	0.9942	0.9405	0.6587	0.8701	0.7504	1.4785	1.4757	1.4915	1.3721	1.5998	1.1919	0.7914	0.5958	0.8111	1.0181	1.3803	1.2042	2.0359	1.2926	1.4185	0.9623	0.9864	0.7639	0.6401	0.9469	1.3787	1.1732
2841	sphingomyelin (d18:1/22:2, d18:2/22:1, d16:1/24:2)*	Lipid	Sphingomyelins	57477	LC/MS Pos Late	100006296	2209	783.638					0.8889	0.7736	1.2214	0.9485	1.1377	0.8099	1.3785	1.5572	0.7399	0.8247	1.3955	1.1308	1.0453	1.2513	1.5667	1.0301	0.9941	0.786	0.9389	1.136	1.3875	0.8198	0.8324	1.3211	2.1268	0.9724	0.874	1.3071	0.7766	0.8609	1.3838	1	0.8513	0.7365	0.7206	1.5822	1.8998
2843	sphingomyelin (d18:1/24:1, d18:2/24:0)*	Lipid	Sphingomyelins	47153	LC/MS Pos Late	100005986	3033	813.684		94359-13-4		HMDB12107	0.8138	1.4852	0.6944	0.8689	0.8251	0.8175	1.2311	1.2204	1.1386	1.5384	0.9723	0.882	0.6854	0.8296	0.6515	1.2234	1.3309	1.4603	1.3532	1.3368	1.26	0.7886	0.6238	0.9179	1.0612	1.2879	1.2536	2.1428	1.5067	1.4755	1.0239	1.0445	0.863	0.7872	0.951	1.3278	0.8967
2831	sphingomyelin (d18:2/16:0, d18:1/16:1)*	Lipid	Sphingomyelins	42459	LC/MS Pos Late	100004329	2002	701.559					1.604	1.001	0.6434	0.999	0.9199	1.0324	1.2855	1.1066	1.3909	1.551	0.5875	0.5527	0.5759	0.6537	0.5194	1.2735	1.3829	1.2324	1.6031	1.3609	1.4402	1.3535	0.625	0.9436	0.9844	1.3381	1.3419	2.1581	1.6115	1.4577	0.7788	0.6707	0.8283	0.8227	0.8824	1.2685	0.5769
2823	sphingomyelin (d18:2/18:1)*	Lipid	Sphingomyelins	57474	LC/MS Pos Late	100015788	1904	727.575					0.4274	1.039	0.6476	1.0935	0.8127	1.0679	1.3938	1.22	0.6564	0.6492	0.6554	0.5993	0.9766	1.1503	0.9517	1.0234	1.5731	1.2271	1.4184	1.6044	1.6724	0.8978	0.6955	0.9762	1.1169	2.0286	1.4079	1.9484	1.5474	1.1356	0.8024	0.7382	0.7554	0.5928	1.0688	2.2674	0.4741
2842	sphingomyelin (d18:2/23:0, d18:1/23:1, d17:1/24:1)*	Lipid	Sphingomyelins	52435	LC/MS Pos Late	100008956	2845	799.669					0.7234	0.9935	0.5566	0.6494	0.7788	0.6668	1.2758	1.2534	1.0065	1.3726	0.9596	0.7058	0.5789	0.6895	0.7432	1.0895	1.1264	1.2261	1.1294	1.1947	0.9833	0.7033	0.5305	0.8372	1.0424	1.2446	1.0295	2.1322	1.1947	1.0687	1.0542	0.7343	0.6399	0.7532	0.6423	1.6687	1.0665
2824	sphingomyelin (d18:2/23:1)*	Lipid	Sphingomyelins	57482	LC/MS Pos Late	100015791	2315	797.653					0.9914	0.6994	0.9083	0.8768	1.0942	0.8196	1.4601	1.5531	1.0086	1.0097	1.1261	0.7594	0.6065	0.5372	1.3526	0.5509	0.8288	0.5372	0.8331	1.0273	1.5508	0.7387	0.5372	1.2501	1.9235	1.2512	0.8302	1.5945	1.0197	0.7467	1.5577	0.9061	0.8813	1.0283	0.6648	1.8121	1.3091
2844	sphingomyelin (d18:2/24:1, d18:1/24:2)*	Lipid	Sphingomyelins	52437	LC/MS Pos Late	100008957	2635	811.669					0.9539	1.2775	0.9772	0.8453	0.9368	0.8385	1.2731	1.2799	0.9614	1.0034	1.1596	1.0842	0.8745	1.0658	1.1713	0.8514	0.9966	0.9606	0.9003	0.9466	1.6907	0.7982	0.8164	1.3711	1.8036	0.9585	0.9909	1.4544	0.9547	0.9493	1.5717	1.1946	1.226	1.1248	1.0262	1.341	1.1257
2873	sphingosine	Lipid	Sphingosines	17747	LC/MS Pos Late	297	1393	300.29	5353955	123-78-4	C00319	HMDB00252	0.6458	0.5506	0.4462	0.7391	0.9155	0.6134	0.3665	0.6371	0.4461	0.4374	0.269	0.1239	0.2565	0.5409	0.2901	0.3943	0.5959	0.3108	0.3433	0.2398	3.5953	1.0845	1.2602	2.1997	1.3309	2.3834	2.1233	3.2011	3.7411	1.8946	1.4117	1.9574	1.1253	1.8527	3.1669	4.3441	2.1946
2875	sphingosine 1-phosphate	Lipid	Sphingosines	34445	LC/MS Polar	100000626	1850	378.241	5283560	26993-30-6	C06124	HMDB00277	1.0104	0.7462	0.7526	0.8383	1.6657	0.9896	0.9313	0.8165	0.8961	0.7023	0.1689	0.3507	0.2247	0.3588	0.317	0.3168	0.2529	0.2756	0.239	0.3231	3.0962	1.0465	1.4309	1.2917	1.3057	1.7504	1.3368	1.687	1.4195	1.6479	2.2714	3.113	0.8204	0.8789	1.9287	2.8092	2.3554
4628	stachydrine	Xenobiotics	Food Component/Plant	34384	LC/MS Pos Early	100001296	1440	144.102	115244	4136-37-2	C10172	HMDB04827	0.9646	0.6068	1.0985	0.915	0.8569	0.7676	1.0095	0.5949	1.0427	0.6793	0.738	1.0092	0.8817	0.9267	0.6356	1.084	0.7707	0.8626	1.2895	0.9699	0.697	0.8036	1.2702	0.9512	1.2812	0.9584	1.2562	0.9908	1.299	1.1196	1.0994	1.043	1.1627	1.2424	0.9426	1.4986	1.5988
1170	stachyose	Carbohydrate	Disaccharides and Oligosaccharides	15960	LC/MS Neg	934	920	665.215	439531	10094-58-3	C01613	HMDB03553	1.7629	0.2414	0.5865	1.7558	0.7545	1.0184	0.9592	0.3783	1.362	0.819	0.6585	0.4812	0.8593	0.4963	1.824	1.3934	1.1372	1.2662	1.4004	1.0871	0.6046	0.9873	0.8927	0.7074	0.6396	0.8891	1.1333	0.8718	1.3266	1.0127	1.5393	1.0632	0.4495	1.1937	0.4284	2.0111	1.1391
1364	stearate (18:0)	Lipid	Long Chain Saturated Fatty Acid	1358	LC/MS Neg	439	5872	283.264	5281	57-11-4	C01530	HMDB00827	0.8898	0.7741	0.9994	0.9069	1.4075	0.8054	0.6202	1.5643	0.676	0.7059	0.5994	0.5683	0.7421	1.0609	0.9812	1.4331	1.3314	0.969	0.7781	1.0705	1.2942	1.3061	1.0833	1.3783	1.0322	1.123	1.4619	0.8793	1.5029	1.2758	0.8718	1.0393	1.2638	1.1196	1.0871	0.995	0.6364
1403	stearidonate (18:4n3)	Lipid	Long Chain Polyunsaturated Fatty Acid (n3 and n6)	33969	LC/MS Neg	100001229	5395	275.202	5312508	111174-40-4	C16300	HMDB06547	0.6944	0.5454	0.5775	0.5395	0.7667	0.4248	0.4761	5.2417	0.5401	0.7813	0.5918	0.4144	1.0634	0.3379	2.5832	6.1809	15.4723	3.4739	1.3769	5.5376	1.1848	1.8632	0.6115	1.023	0.8022	1.1571	1.8882	1.8297	2.2629	2.2245	0.6288	0.977	1.9422	1.5046	1.2647	1.0277	0.4517
2819	stearoyl sphingomyelin (d18:1/18:0)	Lipid	Sphingomyelins	19503	LC/MS Pos Late	1538	2400	731.606	6453725	85187-10-6;85187-10-6	C00550	HMDB01348	0.9736	0.8996	0.8677	0.8396	1.1249	0.9254	1.5116	1.7111	0.9367	0.9654	1.2721	1.0101	0.7966	1.3187	1.0275	1.2755	0.9897	1.0843	0.8661	1.1178	1.1755	0.9181	0.6418	0.9873	1.2161	0.9899	0.8378	1.3009	0.8182	0.8541	1.0629	1.0228	0.7625	0.7866	0.7283	1.5388	1.3862
2662	stearoyl-arachidonoyl-glycerol (18:0/20:4) [1]*	Lipid	Diacylglycerol	57450	LC/MS Pos Late	100010949	3404	662.572					1.2378	1.5231	0.8686	1.1808	1.8794	1.2155	0.9483	1.3229	1.1782	0.9146	0.3822	0.5734	0.5975	0.7582	0.4183	1.0416	0.8241	0.7302	0.7537	0.5987	0.9235	0.8175	1.1526	1.4552	1.5681	1.2006	1.0677	1.3323	1.2203	1.0754	0.9015	1.4872	0.8955	0.7597	1.3265	2.057	0.9584
2663	stearoyl-arachidonoyl-glycerol (18:0/20:4) [2]*	Lipid	Diacylglycerol	57449	LC/MS Pos Late	100010950	3522	662.572					1.6998	1.3608	1.0654	1.3638	2.4284	1.3238	1.3714	1.4273	0.6995	0.2434	0.6713	0.4824	0.5364	1.1176	0.4509	1.0753	0.9055	0.6212	0.438	0.5332	1.3527	1.0092	1.2599	1.5073	1.9071	0.7896	0.7179	1.2328	0.9908	0.2434	0.9835	1.4569	1.0804	0.6332	0.2434	2.1305	0.7869
1670	stearoylcarnitine (C18)	Lipid	Fatty Acid Metabolism (Acyl Carnitine, Long Chain Saturated)	34409	LC/MS Pos Late	100001391	1485	428.373	6426855	18822-91-8		HMDB00848	1.1842	1.0947	1.3411	1.8954	2.3167	0.5034	1.1976	3.0793	0.9622	0.9043	1.7259	0.9511	1.2808	2.0887	1.6829	1.3104	2.5014	1.5173	0.752	1.686	1.0381	0.9491	0.9275	1.0111	1.9199	0.545	0.5768	1.3006	0.9469	0.5695	0.9889	0.6643	0.6098	0.6534	0.5202	1.324	0.3293
1741	stearoylcholine*	Lipid	Fatty Acid Metabolism (Acyl Choline)	57464	LC/MS Pos Late	100015759	1520	370.368					0.5308	1	2.9944	0.7615	2.8114	0.3782	0.63	0.7511	0.9135	2.5408	0.2268	0.2268	0.2268	0.2268	0.2268	0.5627	0.2268	0.3076	0.8424	0.2914	1.4323	1.0377	1.0358	1.9235	0.757	1.0334	1.0976	0.9618	0.8195	0.848	0.5957	2.7483	0.544	1.6406	1.0108	1.9429	1.1588
2645	stearoyl-linoleoyl-glycerol (18:0/18:2) [1]*	Lipid	Diacylglycerol	54948	LC/MS Pos Late	100010920	3650	638.572					1.0183	0.2348	0.7122	1.4197	1.8911	0.7963	0.9448	0.7844	0.2348	0.2348	0.5062	0.3175	0.2988	0.5674	1.0059	0.3373	0.2348	0.2749	0.2348	0.2348	1.5779	1.1381	1.3173	1.953	1.574	0.2933	0.497	0.2348	0.2348	0.3405	1.2217	2.2582	1.1296	0.9941	0.3748	4.0984	1.4414
2646	stearoyl-linoleoyl-glycerol (18:0/18:2) [2]*	Lipid	Diacylglycerol	54947	LC/MS Pos Late	100010921	3762	638.572					1.9549	0.9957	0.9121	2.2352	2.2151	1.8076	0.9406	0.6475	0.7327	0.1822	0.6566	0.5882	0.5755	1.0043	0.7722	0.4003	0.1647	0.1647	0.5741	0.1647	3.0199	1.3231	1.4404	2.2932	2.143	1.0726	0.8222	0.4154	0.8278	0.6507	1.2063	2.6921	1.7212	1.336	0.7902	3.1979	1.3408
1519	suberate (C8-DC)	Lipid	Fatty Acid, Dicarboxylate	15730	LC/MS Polar	100000016	2577.6	173.082	10457	505-48-6	C08278	HMDB00893	0.7099	0.6926	1.1771	0.4529	0.6961	0.9951	1.0114	1.8337	0.8815	0.3599	0.5548	0.4734	0.7867	1.4917	1.0029	2.6251	9.0639	1.4086	1.0347	1.6165	1.2494	0.5561	1.1581	1.0853	2.1233	0.83	0.7757	0.6568	0.792	0.9971	1.1254	1.0443	1.2783	1.0988	2.3975	1.5656	0.9112
1311	succinate	Energy	TCA Cycle	1437	LC/MS Polar	252	3149	117.019	1110	110-15-6	C00042	HMDB00254	0.8562	0.6422	0.6499	0.9113	0.8652	1.0202	0.7756	0.9798	0.6801	0.74	0.9663	0.7291	1.0774	0.5076	1.0211	0.6858	1.4381	0.7228	0.5738	0.7187	1.1635	0.7542	1.9454	1.3034	1.8932	1.6189	1.1819	1.4115	1.6707	1.3102	1.0957	1.2877	0.6693	0.9119	0.9626	1.1538	1.4074
419	succinoyltaurine	Amino Acid	Methionine, Cysteine, SAM and Taurine Metabolism	63678	LC/MS Polar	100021220	2572	224.023					1.2391	0.659	1.7527	0.8745	0.6273	1.6059	2.8641	1.7761	2.6532	1.2916	1.212	1.2561	1.1075	1.0694	0.9874	1.5411	2.9899	0.9732	0.598	1.2717	2.0907	0.9382	0.7256	1.3638	1.0737	0.8772	0.6382	0.9002	0.5259	1.0126	0.6695	0.5027	0.6932	1.1108	1.8914	0.5252	0.5892
1310	succinylcarnitine (C4-DC)	Energy	TCA Cycle	37058	LC/MS Pos Early	100001948	2291	262.128	71464481	256928-74-2		HMDB61717	0.9751	1.4021	0.895	1.6912	0.7978	1.1078	1.0394	1.203	1.0765	1.083	1.0768	0.9087	0.9291	2.3177	0.6992	1.2806	0.8222	0.9543	0.9668	0.872	0.9164	1.4595	1.0706	1.0884	0.6682	0.9987	0.8547	0.8173	1.0389	1.0013	0.9916	1.1266	1.275	1.1091	1.1566	0.8381	0.8726
1192	sucrose	Carbohydrate	Disaccharides and Oligosaccharides	1519	LC/MS Polar	935	3092	387.114	5988	57-50-1	C00089	HMDB00258	2.0711	0.7878	0.9737	0.5513	0.5546	0.446	0.7082	0.2061	0.8048	0.3795	5.4338	2.081	6.9273	5.5313	9.0014	5.7446	3.2374	4.6248	5.4481	2.7662	0.343	0.5985	1.8733	0.4651	0.4872	0.58	0.6453	0.4939	1.4013	0.5507	4.6906	2.2161	0.8756	1.0263	0.6182	6.1497	2.8919
5365	sulfate*	Xenobiotics	Chemical	46960	LC/MS Neg	100002528	616	96.9601	1118	14808-79-8	C00059	HMDB01448	0.8128	0.6937	1.0559	0.8253	1.1426	1.2603	1.3825	0.8907	1.1613	1.1726	1.4474	1.5054	1.0331	1.2675	1.0591	1.163	1.0645	1.0122	1.0038	1.1852	0.6118	0.9016	0.866	0.9381	0.4486	0.8328	1.2374	1.2965	0.9962	0.9734	0.9137	0.8539	0.7737	0.6083	0.63	1.1816	1.06
4635	syringic acid	Xenobiotics	Food Component/Plant	37091	LC/MS Neg	100001919	1450	197.046	10742	530-57-4	C10833	HMDB02085	0.993	0.9046	1.4127	0.4879	0.4879	0.5851	1.0514	0.4879	0.9218	0.4879	0.8799	0.7753	0.4879	0.4879	0.4879	0.4879	0.4879	0.7566	1.2848	0.4879	0.4879	0.4879	1.007	0.7512	1.0965	0.6548	0.7474	0.4879	0.8482	1.035	1.4775	1.1956	1.3505	1.132	0.6986	1.3696	1.519
4762	tartronate (hydroxymalonate)	Xenobiotics	Food Component/Plant	20693	LC/MS Neg	100000840	610	118.999	45	80-69-3	C02287	HMDB35227	1.2288	2.3579	1.8508	1.4424	2.074	1.612	1.3202	1.5938	0.9647	0.1456	0.7913	0.6768	1.7047	1.543	0.7307	0.8466	0.1456	0.6838	1.5766	0.3799	1.1092	1.0743	1.1422	1.298	0.6313	0.4787	0.2612	1.3148	0.5117	0.3398	1	0.8286	1.5007	1.3953	1.1497	0.8662	0.8057
416	taurine	Amino Acid	Methionine, Cysteine, SAM and Taurine Metabolism	2125	LC/MS Pos Early	512	660	126.022	1123	107-35-7	C00245	HMDB00251	1.9574	1.5874	1.2016	0.769	0.5581	1.4245	1.3446	1.5449	1.1899	1.233	1.1773	1.1203	0.9928	3.0791	1.1457	0.8317	0.7809	0.8626	0.5437	0.6688	1.1267	1.201	1.7622	1.2374	0.9093	1.169	0.8332	0.6069	0.695	0.7585	1.2815	1.0851	0.5624	1.0072	0.6673	0.8018	0.4241
3150	tauro-alpha-muricholate	Lipid	Primary Bile Acid Metabolism	42605	LC/MS Neg	100004064	4745	514.284					1.2366	0.5034	0.7308	1.3155	0.827	0.7703	0.3767	0.5133	1.0572	0.4725	1.1818	1.4968	2.2132	0.7814	0.4838	0.5923	0.9816	1.7834	0.7328	0.3295	1.2508	1.2456	0.9056	0.8045	0.9321	1.0247	1.0184	2.4685	1.5159	0.662	2.3056	1.6586	0.8808	3.1135	1.3408	0.5756	1.1792
3151	tauro-beta-muricholate	Lipid	Primary Bile Acid Metabolism	33983	LC/MS Neg	100001250	4774	514.284	168408	25696-60-0		HMDB00932	0.7085	2.0475	4.8551	2.559	3.3441	0.2656	0.2656	0.2656	0.3345	0.2656	0.4828	0.2656	2.314	3.1787	0.2656	0.2656	0.2656	0.2656	0.353	0.2656	0.2656	0.2656	0.6646	0.5583	1	0.5036	0.2656	4.0827	0.2656	0.2656	0.2656	1.08	2.2423	0.2656	0.3873	0.2656	0.2656
3147	taurochenodeoxycholate	Lipid	Primary Bile Acid Metabolism	18494	LC/MS Neg	1629	5250	498.289	387316	6009-98-9	C05465	HMDB00951	1.3111	0.5968	1.1495	1.289	0.8824	0.8736	0.403	0.0855	1.0066	0.5614	1.1824	0.9373	1.4185	0.8356	0.3419	0.4704	0.7697	0.8613	1.0523	0.267	2.2642	1.5801	0.9934	1.7621	1.4138	1.3588	1.3903	1.3679	0.9271	1.1343	1.3286	1.1908	1.1484	1.7098	1.0228	0.6112	0.5085
3220	taurochenodeoxycholic acid 3-sulfate	Lipid	Secondary Bile Acid Metabolism	62890	LC/MS Neg	100021093	4809	288.62				HMDB02486	0.3651	2.1229	2.1893	1.8744	1.7078	1.0795	0.3982	0.3673	1.2064	0.664	0.6383	0.6058	4.7957	1.2589	0.7741	0.7213	1.1976	2.3698	1.1279	0.3626	0.7371	1.0548	1.0076	1.8975	1.4685	1.1394	0.594	4.0671	0.8418	0.6506	0.6826	2.6473	0.8067	2.0821	0.4442	0.6989	0.1797
3140	taurocholate	Lipid	Primary Bile Acid Metabolism	18497	LC/MS Neg	1648	5150	514.284	6675	145-42-6	C05122	HMDB00036	0.7338	0.4163	1.6777	1.8399	0.9994	0.6674	0.154	0.0747	0.5108	0.2157	1.8708	0.8573	2.2463	1.7254	0.5526	0.5202	0.7914	1.1433	1.2798	0.2857	1.5889	1.0658	1.194	1.2457	1.0393	0.9493	0.2417	7.3936	0.1655	0.4059	1.6399	2.1607	2.0477	1.8343	1.6997	0.9858	0.7292
3182	taurolithocholate	Lipid	Secondary Bile Acid Metabolism	31889	LC/MS Neg	100001065	5345	482.295	10595	516-90-5	C02592	HMDB00722	2.5563	5.3492	12.4208	5.6466	3.4423	2.466	0.3717	0.868	0.6958	0.2541	0.4271	0.312	0.9152	2.9619	0.4856	1.5456	0.4888	0.2117	3.325	0.1245	2.4059	2.0373	8.3229	5.7891	18.1059	1	0.623	9.905	0.4433	0.7942	0.7464	3.538	6.5853	8.2634	4.7321	0.4585	0.2027
3183	taurolithocholate 3-sulfate	Lipid	Secondary Bile Acid Metabolism	36850	LC/MS Neg	100001658	5027	280.622	440071	64936-83-0	C03642	HMDB02580	0.4404	2.9614	4.5736	2.0132	1.4972	1.2888	0.4099	1.07	0.3896	0.3029	0.1343	0.1343	1	1.0223	0.4651	1.1166	0.5169	0.2511	2.4304	0.1343	0.5635	1.1453	1.2432	4.5905	5.633	0.9826	0.1585	3.6554	0.1343	0.2055	0.1719	1.2956	0.9551	1.7755	0.6136	0.3383	0.1343
3197	tauroursodeoxycholate	Lipid	Secondary Bile Acid Metabolism	39378	LC/MS Neg	100002912	5025	498.289	9848818	14605-22-2		HMDB00874	1.0727	0.4317	0.6823	0.638	0.5209	0.6136	0.2424	0.2424	1.3111	0.2424	0.6985	0.2424	1.4515	0.2424	0.2424	0.2424	0.3367	0.2424	0.983	0.2424	1.9697	2.6562	0.7177	1.2489	1.5419	1.7343	1.689	0.7207	1.2517	0.7123	1.017	1.3286	0.3026	1.5563	0.2424	0.2424	0.2424
1396	tetradecadienoate (14:2)*	Lipid	Long Chain Polyunsaturated Fatty Acid (n3 and n6)	62850	LC/MS Neg	100020343	5292	223.17	5312409	39039-37-7		HMDB00560	0.7108	0.5479	1.1381	0.8316	1.2721	0.4499	0.6327	4.7411	0.4369	0.5917	0.5758	0.4103	0.9695	1.6042	1.7619	2.2339	2.336	1.4239	0.8653	2.307	1.1376	1.6554	1.4316	1.0168	1.6051	0.9832	1.9391	1.286	1.2742	1.1521	0.8864	0.7096	1.0565	0.6924	1.0714	0.7283	0.4993
1534	tetradecanedioate (C14)	Lipid	Fatty Acid, Dicarboxylate	35669	LC/MS Neg	100001613	3985	257.176	13185	821-38-5		HMDB00872	0.7022	0.5894	0.8134	0.9926	0.8667	0.8786	1.214	6.2748	1	1.3323	0.5118	0.5118	0.7528	1.0576	1.1504	10.8847	20.1609	2.1826	2.1404	5.4176	0.6706	0.5118	0.8695	1.4097	0.6443	1.0335	1.2387	1.3181	1.245	1.2106	0.523	0.6426	0.8946	0.7254	0.8626	1.8912	0.5118
4080	thiamin (Vitamin B1)	Cofactors and Vitamins	Thiamine Metabolism	5341	LC/MS Pos Early	873	3050	265.112	1130	59-43-8	C00378	HMDB00235	1.9535	1.1008	2.3217	1.563	0.3049	1.3443	0.5986	0.3049	0.6533	0.3825	1.6305	0.3049	0.9251	2.2853	1.7759	0.3987	0.384	0.3049	0.3049	0.3049	0.8964	1.5644	1.8748	1.1808	3.6628	1.272	0.9756	0.528	1.4274	1	1.5108	0.5725	0.324	0.5423	0.5306	1.0546	0.3049
5505	thioproline	Xenobiotics	Chemical	53231	LC/MS Pos Early	100009232	1250	134.027	93176	34592-47-4			0.8459	0.7429	1.1236	0.9262	0.9677	0.975	0.797	1.0127	0.7867	1.1317	0.418	0.4497	0.665	1.6165	0.7282	0.8556	1.0238	0.7693	0.8272	1.028	0.4919	0.79	1.7057	1.6353	1.5231	1.5613	1.08	0.9873	1.3781	1.2398	1.1207	0.8746	0.7839	1.0404	0.7545	1.0337	1.2298
4016	threonate	Cofactors and Vitamins	Ascorbate and Aldarate Metabolism	27738	LC/MS Polar	100001022	2384	135.03	151152	70753-61-6	C01620	HMDB00943	1.2452	0.6643	0.8537	0.6062	1.3028	0.9319	1.4922	0.9499	0.9106	0.9343	1.14	0.9873	1.0127	1.2363	0.952	0.8575	0.9387	1.0546	0.7213	0.6988	0.9063	0.9176	1.5758	1.1936	1.1808	0.9405	0.7788	1.1045	0.9133	1.1854	1.0372	0.6815	1.0432	1.1134	1.0133	1.0501	1.7654
16	threonine	Amino Acid	Glycine, Serine and Threonine Metabolism	1284	LC/MS Pos Early	564	1514	120.066	6288	72-19-5	C00188	HMDB00167	1.1023	0.715	0.3128	1.2456	1.012	0.8589	1.1977	0.7348	0.8514	0.9369	1.1264	0.6597	0.9009	0.9098	1.3352	1.1099	0.9529	1.0582	0.8261	1.066	1.3941	1.2209	1.0742	1.3963	1.1843	0.7978	0.988	0.9258	0.7903	1.0644	1.0347	1.2762	1.1033	1.0454	0.4937	0.7531	0.9327
1854	thromboxane B2	Lipid	Eicosanoid	17807	LC/MS Neg	1308	4526	369.228	5283137	54397-85-2	C05963	HMDB03252	1.053	2.3122	1.13	0.7019	2.0472	1.3779	0.0925	1.407	0.2575	0.382	0.066	0.066	0.2252	0.066	0.066	0.066	0.1179	0.066	0.066	0.066	0.066	0.995	1.1344	1.2747	0.5852	0.9846	1.1685	0.066	1.4422	1.626	0.3971	0.2033	0.3354	1.2713	1.6476	1.9647	1
3944	thymidine	Nucleotide	Pyrimidine Metabolism, Thymine containing	2183	LC/MS Neg	872	1963.7	241.083	5789	50-89-5	C00214	HMDB00273	0.9337	0.8067	1.0663	0.8335	2.554	0.558	0.3885	0.7518	0.3362	0.3962	0.4428	0.4599	0.519	0.3953	0.375	0.3808	0.4932	0.2823	0.2099	0.3808	0.5462	1.8842	4.0394	2.7056	3.1586	3.6854	3.226	0.4427	3.0798	3.9997	1.3471	1.3103	1.9456	2.2869	3.0346	3.7714	2.1789
3947	thymine	Nucleotide	Pyrimidine Metabolism, Thymine containing	604	LC/MS Neg	882	1654	125.036	1135	65-71-4	C00178	HMDB00262	0.8969	0.196	0.196	0.196	0.9256	1.995	0.7896	0.5065	0.196	0.196	0.6295	0.196	0.196	0.196	0.8191	0.9245	1.102	0.7743	0.196	0.196	1.4685	0.793	2.1636	1.7212	1.5251	0.5109	1.516	1.7462	2.0487	1.0078	1.2341	0.6792	0.196	1.2761	0.995	1.3994	1.005
452	hydroxyproline	Amino Acid	Urea cycle; Arginine and Proline Metabolism	32306	LC/MS Pos Early	1001	1064	132.065	5810	51-35-4	C01157	HMDB00725	0.6152	0.8155	0.4591	0.7361	0.8043	1.108	1.6782	1.4556	0.9357	1.4356	0.9817	0.9238	1.0344	0.765	1.0128	2.0845	1.5911	1.1836	1.2515	2.0337	1.2318	0.9034	0.786	0.9041	1.1467	1.2054	1.507	1.817	1.433	1.0779	0.8105	0.6812	0.9872	0.8899	1.2055	0.914	0.9632
74	trans-urocanate	Amino Acid	Histidine Metabolism	607	LC/MS Pos Early	537	2285	139.05	736715	104-98-3	C00785	HMDB00301	1.3115	1.2928	1.5353	1.0177	1.0246	1.2156	2.3417	0.6682	1.2349	0.322	1.5632	0.723	1.3337	1.6722	0.7743	0.5255	0.865	0.9823	0.7574	0.4286	0.9131	1.1374	1.1705	1.557	1.8739	0.6168	0.9241	0.5559	0.3874	0.7944	1.618	0.9288	1.104	2.1479	1.5575	1.3726	0.8147
4799	triacetate lactone	Xenobiotics	Bacterial/Fungal	48571	LC/MS Neg	100006246	1238	125.024		675-10-5	C02752		1.013	1.7037	0.9792	1.2713	1.249	0.8657	1.0066	1.0062	1.5529	0.9178	0.75	0.8494	0.7952	0.6463	0.6442	0.674	0.8891	0.8186	0.8186	0.9365	1.0938	0.9938	0.9902	0.9207	0.9024	1.3772	1.4471	0.8656	2.3298	1.4282	0.7042	1.8098	3.0605	1.3158	1.1579	1.7115	1.0861
1319	tricarballylate	Energy	TCA Cycle	15729	LC/MS Polar	2053	4200	175.025	14925	99-14-9	C19806	HMDB31193	1.0101	0.8866	1.7212	0.1648	0.2738	1.5642	1.1213	0.2123	0.1117	0.5821	1.3736	3.127	1.8212	1.6255	0.9834	0.7526	0.191	3.9832	0.2498	0.136	0.2513	0.1913	0.5757	0.7662	1.5362	0.7274	0.3737	3.3174	1.2779	1.7684	2.1381	0.9899	3.2692	8.9286	2.9988	6.6565	7.3787
2821	tricosanoyl sphingomyelin (d18:1/23:0)*	Lipid	Sphingomyelins	52436	LC/MS Pos Late	100008955	3200	801.684				HMDB12105	0.9832	1.3969	1.2373	0.961	0.9399	0.6889	1.2168	1.2323	1.0168	1.2124	0.9627	0.7379	0.7735	0.9216	0.9194	1.0329	1.0711	1.1988	1.0292	1.1518	1.2613	0.6218	0.7218	1.4343	1.4369	0.9598	1.1606	1.166	1.2352	1.1375	1.1297	1.0445	0.8715	0.9786	0.7905	0.9702	0.6524
5476	triethanolamine	Xenobiotics	Chemical	22202	LC/MS Pos Early	100000989	1963	150.113	7618	102-71-6	C06771	HMDB32538	0.4677	0.7511	3.4946	1.4394	1.4038	1822.57	1.9096	1.589	1.8431	0.6993	0.815	0.9022	1.1561	1.572	1.2311	6.3616	3.2945	2.0297	1.4153	1.3534	0.9667	0.823	0.6566	1.2484	0.6232	4.538	0.4766	1.0333	0.5613	0.8217	0.504	0.9195	1.4048	0.7557	0.6137	0.6363	0.4186
3988	trigonelline (N'-methylnicotinate)	Cofactors and Vitamins	Nicotinate and Nicotinamide Metabolism	32401	LC/MS Pos Early	100001092	1388	138.055	5570	535-83-1	C01004	HMDB00875	1.4059	1.0146	1.3583	0.5748	0.5888	1.2095	1.122	0.1758	1.2073	0.3327	0.7545	0.296	0.7277	0.6167	0.4225	0.5526	0.381	0.5852	0.9854	0.2344	0.8715	0.9424	1.7834	1.209	2.4511	1.3741	1.078	0.3414	1.1219	1.5413	1.4365	0.9564	0.8342	1.0196	1.0415	1.7011	1.7626
2008	trimethylamine N-oxide	Lipid	Phospholipid Metabolism	40406	LC/MS Pos Early	100003397	2100	76.0757	1145	1184-78-7	C01104	HMDB00925	1.0223	1.6114	2.4862	0.718	0.6668	0.6731	0.8849	0.637	1.0572	0.5513	1.7112	0.9307	1.25	3.0915	1.8282	0.7669	0.2094	0.9699	0.0945	0.168	0.7807	0.5876	1.459	0.7267	1.2801	0.6276	1.4774	0.5705	0.9777	1.0332	1.3013	1.3905	0.7581	1.8184	1.2965	1.7036	4.1189
269	tryptamine	Amino Acid	Tryptophan Metabolism	6104	LC/MS Pos Early	1095	3062	161.107	1150	61-54-1	C00398	HMDB00303	1.2416	0.7715	0.2716	0.222	1.5839	0.4771	0.5497	0.8127	0.9222	0.483	0.2662	0.222	0.222	0.403	0.222	0.2622	0.222	0.222	0.3146	0.2898	1.3228	1.3528	1.0444	1.4202	1.6746	0.7492	1	0.9188	1.2145	1.2895	4.0188	1.7086	1.2396	1.6164	0.7483	1.73	0.9284
234	tryptophan	Amino Acid	Tryptophan Metabolism	54	LC/MS Pos Early	565	2986	205.097	6305	73-22-3	C00078	HMDB00929	1.2772	1.0737	0.9665	1.096	1.1459	0.9973	1.2615	0.7622	1.1216	1.098	0.9382	1.0252	0.9622	0.8723	1.1214	0.8632	0.5928	0.9872	1.2364	0.8181	1.0366	1.2693	1.0532	1.2558	0.998	0.9895	0.9142	1.1552	0.8469	1.002	1.4344	1.0294	0.63	1.0073	0.6775	0.9022	0.8907
160	tyramine	Amino Acid	Tyrosine Metabolism	1603	LC/MS Pos Early	1133	2540	138.091	5610	60-19-5	C00483	HMDB00306	1.4839	1.2072	0.2245	0.5034	1.218	1.1923	0.8962	1.8252	1.0909	0.8816	0.5385	0.3815	0.4699	0.4075	0.2245	1.0023	0.3972	0.2245	0.6687	0.376	1.8204	1.3996	0.4668	1.1175	0.9537	0.722	1.4113	0.2317	1.454	1.227	1.7676	1.6252	1.3745	1.2788	1.2412	0.9111	0.585
154	tyrosine	Amino Acid	Tyrosine Metabolism	1299	LC/MS Pos Early	815	2430	182.081	6057	60-18-4	C00082	HMDB00158	1.3065	1.3145	0.6604	0.6492	1.0648	1.2221	1.2275	1.0214	1.0503	1.2375	0.8796	0.9349	0.8516	0.7703	0.8467	1.128	0.8003	0.7533	1.2068	0.9017	1.2538	1.5926	0.815	1.1366	0.8252	1.3623	1.3037	0.6119	1.1726	1.219	1.033	0.9748	0.7546	0.9786	1.2762	0.7678	0.7275
3893	uracil	Nucleotide	Pyrimidine Metabolism, Uracil containing	605	LC/MS Polar	825	1089.7	111.02	1174	66-22-8	C00106	HMDB00300	0.6295	0.2505	0.3872	0.5309	1.2222	0.5606	0.4956	0.8485	0.3282	0.5611	0.7827	0.3616	0.4128	0.4608	0.8542	0.7625	2.0312	0.6337	0.4771	0.7365	3.3239	1.4826	4.68	4.1254	4.5314	2.2121	1.7933	3.753	3.6735	2.075	2.239	1.9311	0.7095	1.77	1.6792	1.4536	2.5075
3806	urate	Nucleotide	Purine Metabolism, (Hypo)Xanthine/Inosine containing	1604	LC/MS Neg	1134	757.1	167.021	1175	69-93-2;120K5305	C00366	HMDB00289	1.1293	0.8953	2.0754	0.6942	1.1089	1.2136	0.9255	0.5684	1.5307	0.8699	0.9635	0.6523	1.3468	0.5272	1.3508	0.9881	1.0119	1.3687	1.0648	0.8111	0.9112	1.1332	1.3425	1.2878	2.308	1.0368	0.8764	0.6528	0.8283	0.9398	2.2086	0.8329	0.7894	0.9567	1.0375	1.2919	1.1757
426	urea	Amino Acid	Urea cycle; Arginine and Proline Metabolism	1670	LC/MS Pos Early	533	700	121.072	1176	57-13-6	C00086	HMDB00294	2.259	0.4653	1.4189	1.868	1.1537	0.9808	0.5127	0.4806	0.8891	0.1233	1.0285	0.1233	0.1233	0.605	0.6647	0.4651	0.1233	0.4241	0.1233	0.5589	4.1062	3.4923	1.9697	3.8808	2.3789	0.9223	0.4909	0.1233	0.1233	0.8781	1.743	1.3652	1.5613	1.4031	0.1233	0.3995	0.1233
3892	uridine	Nucleotide	Pyrimidine Metabolism, Uracil containing	606	LC/MS Neg	535	1457.6	243.062	6029	58-96-8	C00299	HMDB00296	0.5471	0.1068	0.6817	0.4631	1.0643	0.4883	0.5173	0.9503	0.3799	0.7564	0.6235	0.3539	0.1929	0.7761	0.5286	0.9921	1.2834	0.6107	0.6677	0.8911	1.4373	1.2909	1.6575	1.7405	1.5143	1.8548	1.6606	2.2212	1.6176	1.7482	1.0079	1.1495	0.484	1.0729	1.0248	1.196	1.429
1346	valerate (5:0)	Lipid	Short Chain Fatty Acid	33443	LC/MS Neg	1136	1718	101.061	7991	109-52-4	C00803	HMDB00892	1.3613	0.5495	1.0321	0.6192	1.7129	0.9703	1.5506	1.2087	1.0844	1.2575	0.9616	0.9734	1	1.7627	1.4474	1.7141	1.5153	2.0305	1.6496	1.843	4.2712	3.2386	3.061	3.6823	0.6558	0.5866	0.8603	0.4234	0.5385	0.9268	0.2283	0.2283	0.5368	0.2283	0.6268	0.5089	0.5333
363	valine	Amino Acid	Leucine, Isoleucine and Valine Metabolism	1649	LC/MS Pos Early	566	2479	118.086	6287	72-18-4	C00183	HMDB00883	1.2787	0.8066	0.6869	0.9893	1.1619	0.9728	1.0598	0.6727	0.8884	0.7881	0.8562	0.7504	0.8254	0.8568	1.3226	0.9198	0.8828	1.0212	1.0665	0.905	1.0251	1.3427	1.3133	1.3037	1.1079	1.0606	0.8728	0.9543	0.8907	1.1037	1.8956	1.0618	0.9783	1.5617	0.9746	1.0107	1.1672
188	vanillactate	Amino Acid	Tyrosine Metabolism	54910	LC/MS Neg	100006129	1625	211.061	160637	2475-56-1		HMDB00913	1.7951	0.7585	1.398	0.7651	1.0179	1.2728	1.4946	0.363	1.4201	0.5787	0.5563	0.4314	1.9362	1.6922	0.4724	0.7591	1.3978	0.7757	0.6025	0.4427	0.8459	0.7577	1.9086	0.9014	2.1684	1.7719	1.2109	1.0908	1.2901	1.1112	0.8957	0.8157	0.6752	0.8762	1.1303	1.2169	1.387
215	vanillic alcohol sulfate	Amino Acid	Tyrosine Metabolism	48733	LC/MS Neg	100006125	1808	233.012		754920-02-0			0.7468	0.9063	1.7261	0.8788	1.051	1.1478	1.1234	0.1585	1.7112	0.6817	0.8895	0.1585	0.8873	0.5527	0.3795	0.3046	0.3204	0.391	2.3226	0.8963	1.8453	0.6912	1.3233	1.2903	2.3214	1.6148	1.7261	0.3696	1.867	1.2474	0.9738	1.2987	0.6707	0.6919	1	1.6086	1.3048
3798	xanthine	Nucleotide	Purine Metabolism, (Hypo)Xanthine/Inosine containing	3147	LC/MS Neg	1004	910	151.026	1188	69-89-6	C00385	HMDB00292	0.6477	0.9111	0.9482	0.5146	1.0892	0.6301	0.425	0.6569	0.5191	0.7168	0.9534	0.4337	0.4315	0.7137	0.6993	0.5031	0.869	0.5657	0.4718	0.5466	0.8975	1.1324	1.9295	1.5918	1.5809	2.1843	1.8202	1.2834	1.8637	1.7053	1.1506	1.1994	1.2024	1.2509	1.2286	1.4647	1.3457
3800	xanthosine	Nucleotide	Purine Metabolism, (Hypo)Xanthine/Inosine containing	15136	LC/MS Neg	100000299	1075	283.068	64959	146-80-5	C01762	HMDB00299	0.9272	0.5261	0.8381	0.3323	2.5519	0.7761	0.416	0.4964	0.5772	0.4607	0.3201	0.226	0.4403	0.5265	0.325	0.4602	0.4086	0.4469	0.5341	0.3674	1.9537	1.2499	5.8033	2.8845	4.0827	5.7116	3.3143	3.2658	3.2919	2.7769	1.2961	0.9732	1.0975	1.4274	1.0268	2.3864	4.5559
1137	xylose	Carbohydrate	Pentose Metabolism	15581	LC/MS Polar	826	1727	195.051	135191	609-06-3	C00181	HMDB00098	0.9112	0.295	1.0618	1.1513	0.6108	1.1134	1.0896	1.5623	0.5699	0.3632	1.0145	1.0051	0.6191	0.295	0.9748	1.2589	1.1523	1.2126	1.2642	1.37	1.1306	0.8182	0.295	0.8083	0.739	1.0004	1.1623	1.5225	0.69	0.4179	1.1306	0.548	0.8657	0.9276	0.909	0.7686	1.1105
[truncated: 3 more columns]
