# Supplementary material for: Effect of host genotype and Eimeria acervulina infection on the metabolome of meat-type chickens
Source: PLoS One. 2019 Oct 16;14(10):e0223417. doi: 10.1371/journal.pone.0223417 (PMC6795442; doi:10.1371/journal.pone.0223417)
Supplement: S2 Table — Metabolites with fold change and the level of significance by genotype, time and genotype by time interaction. (XLSX) [file pone.0223417.s002.xlsx]

## Sheet: Sheet1
	University of Georgia - UNGA-01-19VW host genotype and eimeria acervulina infection on meat-type chickens
	Heat map of statistically significant biochemicals profiled in this study.
											Fold of Change																				Statistical Values
											ANOVA Contrasts												ANOVA Main Effects								ANOVA Contrasts
											ACRB TX ACRB CTRL		COBB TX COBB CTRL		COBB ACRB				6 4				GENOTYPE EFFECT	TREATMENT EFFECT	TIME EFFECT	GENOTYPE: TREATMENT INTERACTION	GENOTYPE: TIME INTERACTION	TREATMENT: TIME INTERACTION	GENOTYPE: TREATMENT: TIME INTERACTION		ACRB TX ACRB CTRL				COBB TX COBB CTRL				COBB ACRB								6 4
			Blue shaded cells indicate significant (p≤0.05) ANOVA effect.; light blue shaded cells indicate 0.05<p<0.10								4	6	4	6	CTRL		TX		ACRB		COBB										4		6		4		6		CTRL				TX				ACRB
															4	6	4	6	CTRL	TX	CTRL	TX																	4		6		4		6		CTRL		TX
	Pathway Sort Order	Super Pathway	Sub Pathway	Biochemical Name	Platform	Comp ID	KEGG	HMDB	PUBCHEM	X																				X	p-value	q-value	p-value	q-value	p-value	q-value	p-value	q-value	p-value	q-value	p-value	q-value	p-value	q-value	p-value	q-value	p-value	q-value	p-value
	1	Amino Acid	Glycine, Serine and Threonine Metabolism	glycine	LC/MS pos early	58	C00037	HMDB00123	750		1.08	0.97	0.81	1.09	0.83	0.71	0.63	0.8	1.19	1.07	0.84	1.37									0.3257	0.2057	0.7349	0.7673	0.0434	0.1132	0.4297	0.3546	0.1324	0.1562	0.0019	0.0176	5.5488e-05	0.0004	0.0317	0.0545	0.0595	0.2127	0.5435
	2			N-acetylglycine	LC/MS polar	27710		HMDB00532	10972		1.01	2.55	1.46	1.5	0.64	0.84	0.92	0.49	0.89	2.25	0.75	1.2									0.965	0.4139	0.0006	0.0162	0.1852	0.2348	0.1462	0.1844	0.0319	0.0699	0.5578	0.6187	0.3574	0.2929	0.0064	0.0219	0.5603	0.6045	0.0033
	4			sarcosine	LC/MS pos early	1516	C00213	HMDB00271	1088		0.85	1.24	0.47	1.32	0.78	0.5	0.43	0.54	0.82	1.2	0.41	1.5									0.418	0.2459	0.2798	0.5535	0.0001	0.0028	0.2333	0.2459	0.1245	0.1506	0.0003	0.0052	1.5205e-05	0.0001	0.0005	0.0038	0.3291	0.5028	0.3598
	5			dimethylglycine	LC/MS pos early	5086	C01026	HMDB00092	673		1.02	0.86	0.7	1.16	1.12	0.81	0.77	1.09	0.99	0.84	0.81	1.18									0.8317	0.3794	0.3484	0.5909	0.03	0.0919	0.4208	0.3493	0.3801	0.3049	0.2415	0.4299	0.1205	0.1414	0.5701	0.3112	0.9975	0.727	0.2511
	6			betaine	LC/MS pos early	3141	C00719	HMDB00043	247		0.98	1.18	0.47	0.98	0.76	0.5	0.37	0.41	0.95	1.15	0.47	1.29									0.6604	0.3277	0.1643	0.4269	5.4852e-07	6.0857e-05	0.8081	0.5145	0.0229	0.0578	1.2556e-06	8.2523e-05	2.3968e-09	2.3834e-07	1.1128e-08	3.5727e-06	0.711	0.6556	0.1452
	9			serine	LC/MS pos early	1648	C00065	HMDB00187	5951		1.43	0.91	0.92	1.21	0.91	0.65	0.58	0.86	1.2	0.76	0.78	1.13									0.0038	0.0076	0.4509	0.6687	0.4768	0.4012	0.1315	0.1717	0.4512	0.3357	0.0011	0.0114	6.3394e-05	0.0004	0.2072	0.1666	0.1278	0.3344	0.0271
	10			N-acetylserine	LC/MS polar	37076		HMDB02931	65249		1.07	1.69	1.39	1.39	0.79	0.93	1.02	0.77	1.04	1.64	0.97	1.23									0.7155	0.3406	0.0024	0.0394	0.0402	0.1103	0.0503	0.0915	0.0963	0.1326	0.7445	0.6896	0.9548	0.5216	0.1228	0.1225	0.9409	0.7194	0.0052
	16			threonine	LC/MS pos early	1284	C00188	HMDB00167	6288		1.12	0.79	1.09	0.92	1.04	0.73	1.02	0.85	1.43	1	1.04	0.84									0.2959	0.1946	0.1341	0.3957	0.591	0.4539	0.5915	0.424	0.4694	0.3415	0.0877	0.2251	0.8331	0.4831	0.4492	0.2666	0.0172	0.101	0.9317
	17			N-acetylthreonine	LC/MS neg	33939		HMDB62557	152204		0.61	1.54	1.17	1.05	0.84	1.11	1.63	0.76	1.06	2.69	1.18	1.25									0.0018	0.0043	0.0092	0.0854	0.2841	0.3003	0.7997	0.5129	0.1648	0.1814	0.487	0.5938	0.0043	0.0112	0.0791	0.0947	0.6996	0.6517	2.1178e-07
	18			allo-threonine	LC/MS polar	15142	C05519	HMDB04041	99289		1.16	0.57	0.84	0.79	1.11	0.77	0.81	1.07	1.44	0.7	1.11	0.94									0.2483	0.1709	0.0851	0.3004	0.606	0.4605	0.3911	0.3331	0.2489	0.2361	0.3205	0.4915	0.6049	0.4023	0.9195	0.4028	0.0573	0.2079	0.3344
	28		Alanine and Aspartate Metabolism	alanine	LC/MS pos early	1126	C00041	HMDB00161	5950		1.25	1.08	1.05	0.89	1.23	1.14	1.03	0.94	1.25	1.07	1.42	0.97									0.0096	0.015	0.4549	0.6713	0.5458	0.434	0.1455	0.1844	0.02	0.0539	0.142	0.3058	0.7638	0.4596	0.463	0.2718	0.0112	0.0797	0.4942
	30			N-acetylalanine	LC/MS polar	1585	C02847	HMDB00766	88064		0.76	1.03	1.22	0.96	0.81	1	1.31	0.92	1.11	1.51	1.11	1.06									0.0311	0.0353	0.8831	0.7927	0.1108	0.1785	0.8146	0.5159	0.0951	0.1322	0.8886	0.735	0.0371	0.06	0.6026	0.3229	0.3462	0.5131	0.002
	31			N-methylalanine	LC/MS pos early	37069	C02721	HMDB0094692	5288725		1.09	1.19	0.75	0.4	1.12	1.97	0.76	0.65	0.62	0.68	1.22	0.58									0.7109	0.3399	0.6912	0.7495	0.4283	0.3787	0.0023	0.0108	0.7598	0.4374	0.0382	0.1448	0.3919	0.3111	0.1316	0.1288	0.1626	0.3705	0.1704
	32			N,N-dimethylalanine	LC/MS pos early	63151			5488191		2.26	0.94	1.4	1.27	2.14	1.82	1.32	2.47	1.44	0.6	2.62	1.12									0.0102	0.0157	0.8444	0.7873	0.5849	0.4535	0.584	0.4211	0.0102	0.0339	0.02	0.0927	0.5855	0.3967	0.0085	0.0258	0.3852	0.5346	0.1082
	35			aspartate	LC/MS pos early	443	C00049	HMDB00191	5960		0.89	0.73	0.71	0.63	1.14	1.37	0.91	1.2	1.53	1.24	2.09	1.64									0.579	0.3006	0.1483	0.4196	0.0895	0.1628	0.0449	0.0856	0.6497	0.3994	0.1777	0.3534	0.4694	0.3516	0.446	0.2657	0.0455	0.1811	0.2544
	36			N-acetylaspartate (NAA)	LC/MS polar	22185	C01042	HMDB00812	65065		1.28	0.89	1.05	0.71	1.97	1.8	1.62	1.43	1.14	0.8	2.06	0.7									0.0394	0.0427	0.2944	0.5647	0.5448	0.434	0.0022	0.0106	2.119e-06	8.0246e-05	1.5737e-05	0.0006	0.0002	0.0009	0.0081	0.0254	0.2194	0.4239	0.0586
	39			asparagine	LC/MS pos early	512	C00152	HMDB00168	6267		1.1	1.26	1.26	2.26	1.41	0.39	1.62	0.69	0.97	1.12	0.38	0.48									0.8691	0.3881	0.654	0.7397	0.1876	0.2349	0.249	0.2529	0.8219	0.455	0.0796	0.2156	0.3475	0.289	0.2843	0.207	0.7163	0.6575	0.5185
	40			N-acetylasparagine	LC/MS polar	33942		HMDB06028	99715		0.53	1.31	1.05	0.83	0.96	1.28	1.88	0.81	1.12	2.74	1.43	1.19									0.013	0.0182	0.307	0.5716	0.5579	0.439	0.4724	0.3752	0.443	0.3349	0.3945	0.5368	0.0202	0.0368	0.3736	0.2363	0.6213	0.6268	0.0002
	41			hydroxyasparagine**	LC/MS pos early	62060	C03124	HMDB32332	97663		1.53	0.78	1.54	0.7	1.83	1.69	1.83	1.53	1.5	0.76	2.54	0.63									1.3655e-05	0.0001	0.0074	0.0773	2.6722e-05	0.0008	0.0003	0.0022	5.7675e-08	4.3683e-06	1.038e-06	8.2523e-05	1.1077e-07	3.5441e-06	3.4234e-05	0.0008	3.1236e-05	0.0021	0.0036
	42		Glutamate Metabolism	glutamate	LC/MS pos early	57	C00025	HMDB00148	611		1.06	0.8	1.04	0.92	1.05	0.95	1.04	1.1	1.35	1.02	1.28	1.08									0.4347	0.2518	0.0109	0.0908	0.6196	0.4678	0.3234	0.3008	0.5678	0.3738	0.53	0.6145	0.7755	0.4639	0.2951	0.211	0.0008	0.0192	0.8255
	43			glutamine	LC/MS pos early	53	C00064	HMDB00641	5961		0.93	0.87	0.88	0.75	1.19	1.14	1.13	0.99	1.06	0.99	1.2	0.87									0.5011	0.2734	0.2183	0.4821	0.2745	0.2942	0.0051	0.0169	0.143	0.1637	0.2498	0.4358	0.2927	0.2592	0.5646	0.3102	0.6468	0.6372	0.911
	44			alpha-ketoglutaramate*	LC/MS polar	62101			48		0.73	0.84	0.96	0.91	1.55	1.39	2.05	1.49	1.15	1.33	1.59	0.97									0.0161	0.0217	0.193	0.4622	0.6995	0.4983	0.3634	0.3195	0.0017	0.0095	0.0126	0.065	3.7852e-06	5.0185e-05	0.0045	0.0176	0.292	0.4781	0.0293
	45			N-acetylglutamate	LC/MS polar	15720	C00624	HMDB01138	70914		0.65	1.47	0.99	1.39	0.94	1.18	1.43	1.11	0.82	1.85	0.96	1.44									0.1073	0.0908	0.1072	0.3497	0.9423	0.5769	0.2152	0.2297	0.634	0.3943	0.49	0.5938	0.2207	0.2163	0.7619	0.3651	0.4812	0.5664	0.0139
	46			N-acetylglutamine	LC/MS polar	33943	C02716	HMDB06029	182230		0.7	0.97	0.84	1.08	0.67	0.75	0.79	0.82	0.84	1.16	0.62	1.21									0.0446	0.0467	0.8471	0.7873	0.3389	0.3304	0.975	0.5588	0.0247	0.0614	0.0943	0.2341	0.2248	0.2197	0.1438	0.1358	0.3287	0.5028	0.3725
	48			4-hydroxyglutamate	LC/MS pos early	40499	C03079	HMDB01344	439902		1.44	0.81	1.03	0.73	2.13	1.37	1.54	1.24	1.42	0.8	1.95	0.65									0.0369	0.0404	0.1797	0.446	0.9782	0.5866	0.0544	0.0949	3.9972e-05	0.0006	0.0521	0.1723	0.0137	0.0267	0.1735	0.1505	0.0369	0.1625	0.1796
	52			pyroglutamine*	LC/MS pos early	46225			134508		2.3	1.12	1.59	1.75	0.6	0.42	0.42	0.66	1.03	0.5	0.44	0.79									0.0042	0.0082	0.5649	0.7125	0.2027	0.2431	0.0413	0.081	0.1085	0.1393	0.0026	0.0211	0.0017	0.0053	0.0936	0.1047	0.9634	0.7207	0.0197
	54			beta-citrylglutamate	LC/MS neg	54923	C20775		72715786		1.59	0.42	1.4	0.98	1.21	0.73	1.07	1.7	2.82	0.74	2.05	1.18									0.1309	0.1053	0.0098	0.0884	0.1561	0.2149	0.7619	0.4965	0.8383	0.4608	0.3501	0.5118	0.915	0.5104	0.1455	0.1358	0.0039	0.0403	0.2446
	56			carboxyethyl-GABA	LC/MS pos early	40007		HMDB02201	2572		1.02	1	1.32	1.22	0.95	0.84	1.23	1.03	1.31	1.28	1.1	1.08									0.9256	0.401	0.8341	0.7873	0.1809	0.2347	0.3213	0.3007	0.8645	0.465	0.5308	0.6145	0.2063	0.2082	0.872	0.393	0.2121	0.4142	0.1243
	57			N-methyl-GABA	LC/MS pos early	39577	C15987		70703		1.78	0.77	1.18	0.61	1.29	0.85	0.86	0.67	1.09	0.47	0.93	0.37									0.0022	0.0051	0.1268	0.3846	0.372	0.3484	0.0167	0.0404	0.0781	0.1187	0.3203	0.4915	0.5501	0.3862	0.0579	0.0789	0.4072	0.5431	0.0003
	58			2-pyrrolidinone	LC/MS pos early	31675		HMDB02039	12025		1.09	1.46	1.21	1.07	1.06	1.09	1.18	0.8	1.01	1.35	1.1	0.92									0.4829	0.2672	0.0019	0.0335	0.0952	0.1668	0.5721	0.4143	0.6598	0.4039	0.3219	0.4921	0.1558	0.1698	0.0803	0.0952	0.9158	0.7134	0.0152
	60			S-1-pyrroline-5-carboxylate	LC/MS pos early	42370	C04322	HMDB01301	1196		0.59	1.08	0.84	1.43	0.46	0.87	0.65	1.15	0.57	1.03	0.49	1.83									0.0465	0.048	0.6728	0.7442	0.354	0.3386	0.1499	0.1863	0.0185	0.0511	0.6608	0.6547	0.1859	0.1921	0.5488	0.3064	0.0749	0.2527	0.5163
	67		Histidine Metabolism	histidine	LC/MS neg	59	C00135	HMDB00177	6274		0.77	0.85	0.77	0.81	0.83	0.86	0.83	0.82	1.16	1.28	1	1.28									0.0804	0.0728	0.2159	0.4821	0.0513	0.1211	0.1195	0.1604	0.1921	0.2014	0.2128	0.3969	0.1306	0.1493	0.1176	0.1196	0.1898	0.3922	0.0688
	68			1-methylhistidine	LC/MS neg	30460	C01152	HMDB00001	92105		1.88	1.06	1.07	1.3	1.11	0.58	0.63	0.71	1.56	0.88	0.9	0.98									0.0001	0.0005	0.6086	0.7276	0.6034	0.4593	0.0877	0.128	0.4362	0.3317	0.0005	0.0068	0.0038	0.01	0.0129	0.0321	0.004	0.0403	0.419
	69			3-methylhistidine	LC/MS neg	15677	C01152	HMDB00479	64969		1.28	1.08	0.6	0.74	0.76	0.4	0.36	0.28	1.17	0.99	0.47	0.77									0.1917	0.1412	0.7337	0.7673	0.0122	0.0545	0.2436	0.2506	0.2113	0.2112	2.7171e-05	0.0009	9.1286e-06	9.8132e-05	3.2042e-07	3.4293e-05	0.3814	0.5344	0.9186
	70			N-acetylhistidine	LC/MS neg	33946	C02997	HMDB32055	75619		0.47	0.92	0.92	0.82	0.75	0.94	1.46	0.84	1.05	2.03	0.99	1.16									0.0006	0.0019	0.6173	0.7306	0.8199	0.5388	0.2546	0.2557	0.1182	0.1463	0.7928	0.7127	0.0591	0.0839	0.3643	0.234	0.676	0.6402	0.0008
	71			N-acetyl-3-methylhistidine*	LC/MS pos early	43256			193270		0.6	0.8	0.26	0.27	0.53	0.4	0.23	0.13	1.29	1.72	0.52	1									0.4003	0.2377	0.9464	0.8036	0.0379	0.1062	0.0458	0.0858	0.2111	0.2112	0.0609	0.1823	0.0144	0.0279	0.0003	0.0027	0.5662	0.6071	0.1435
	72			N-acetyl-1-methylhistidine*	LC/MS pos early	43255			53859791		0.87	0.79	0.87	0.8	1.13	0.75	1.13	0.76	1.51	1.38	1.14	0.94									0.36	0.2208	0.3079	0.5716	0.5078	0.4181	0.1987	0.2233	0.5936	0.3823	0.2217	0.4108	0.4308	0.3301	0.1377	0.1318	0.0443	0.1794	0.0556
	73			hydantoin-5-propionate	LC/MS polar	40473	C05565	HMDB01212	782		2.44	1.05	3.74	2.32	0.6	0.59	0.92	1.3	0.79	0.34	0.47	0.48									0.0272	0.0316	0.708	0.7547	0.0027	0.0217	0.0529	0.0939	0.1052	0.137	0.1539	0.3277	0.475	0.3516	0.865	0.3919	0.7363	0.6681	0.0297
	74			trans-urocanate	LC/MS pos early	607	C00785	HMDB00301	736715		0.98	1.11	0.62	1.41	0.94	0.49	0.59	0.63	1.08	1.21	0.53	1.3									0.7924	0.3673	0.721	0.7587	0.1931	0.2394	0.1547	0.1893	0.3115	0.2706	0.0068	0.0422	0.0444	0.0701	0.0822	0.096	0.8309	0.6853	0.4066
	76			imidazole propionate	LC/MS pos early	40730		HMDB02271	70630		1.01	1.86	0.13	0.45	2.04	0.94	0.27	0.23	0.67	1.24	0.63	1.07									0.9988	0.4212	0.3649	0.6105	0.0574	0.1286	0.6806	0.4622	0.8676	0.4654	0.637	0.643	0.081	0.1077	0.0796	0.095	0.5097	0.577	0.8013
	77			formiminoglutamate	LC/MS pos early	43493	C00439	HMDB00854	439233		3.21	1.25	5.24	1.16	0.87	1.41	1.42	1.31	1.12	0.44	1.58	0.4									0.0122	0.0175	0.6831	0.7491	0.0031	0.0233	0.436	0.357	0.6176	0.3873	0.8043	0.7158	0.9695	0.5248	0.8997	0.3998	0.592	0.6201	0.0982
	78			imidazole lactate	LC/MS pos early	15716	C05568	HMDB02320	793		0.73	1	2.74	1.33	0.45	0.58	1.69	0.77	0.99	1.36	0.57	0.62									0.4871	0.2681	0.7671	0.7723	0.0472	0.1183	0.377	0.3244	0.0284	0.0655	0.1236	0.2811	0.6412	0.4142	0.7013	0.3488	0.9949	0.727	0.6933
	79			carnosine	LC/MS pos early	1768	C00386	HMDB00033	439224		1.96	0.82	0.9	0.7	2.07	1.72	0.95	1.45	1.39	0.58	2.39	0.9									0.1042	0.0893	0.4247	0.6496	0.8442	0.5469	0.2054	0.2264	0.0083	0.0299	0.0578	0.1771	0.3525	0.2921	0.1477	0.1367	0.1272	0.3343	0.3671
	81			N-acetylcarnosine	LC/MS pos early	43488		HMDB12881	9903482		0.9	0.8	1.02	0.83	3.5	2.95	3.99	3.06	1.47	1.32	4.33	1.01									0.6013	0.3075	0.2896	0.5596	0.8364	0.5442	0.2509	0.2531	2.903e-08	2.7484e-06	2.0333e-07	2.8909e-05	3.8442e-09	3.0581e-07	2.6498e-07	3.4293e-05	0.0548	0.2051	0.1583
	82			anserine	LC/MS neg	15747	C01262	HMDB00194	112072		1.76	0.96	0.6	0.75	1.92	0.86	0.66	0.67	1.77	0.96	1.53	0.99									0.0065	0.0116	0.8575	0.7873	0.0094	0.0492	0.1397	0.1798	0.0007	0.0051	0.3815	0.5305	0.0609	0.0862	0.0336	0.0567	0.0022	0.0278	0.816
	83			histamine	LC/MS pos early	1574	C00388	HMDB00870	774		1.69	0.39	3.54	0.36	0.21	1.57	0.44	1.47	1.3	0.3	2.05	0.99									0.3112	0.2014	0.0709	0.2844	0.3497	0.3364	0.0657	0.1052	0.0039	0.0172	0.373	0.5262	0.2641	0.2421	0.3928	0.2429	0.5855	0.6176	0.7748
	85			1-methylhistamine	LC/MS pos early	43831	C05127	HMDB00898	3614		0.46	0.57	0.53	0.55	0.48	1.01	0.56	0.96	0.69	0.86	0.69	1.49									0.0161	0.0217	0.1167	0.3694	0.1026	0.1719	0.1227	0.1623	0.0447	0.0846	0.5829	0.6208	0.2283	0.2215	0.6012	0.3228	0.2931	0.4781	0.8899
	86			1-methyl-4-imidazoleacetate	LC/MS pos early	32350	C05828	HMDB02820	75810		0.49	0.7	0.75	0.89	0.54	0.42	0.83	0.53	1.08	1.55	0.45	0.99									0.0066	0.0116	0.1463	0.4159	0.2489	0.2811	0.5672	0.4121	0.0265	0.0633	0.0004	0.0056	0.5573	0.3881	0.0045	0.0176	0.4259	0.549	0.0333
	87			1-methyl-5-imidazoleacetate	LC/MS pos early	62946		HMDB04988	6451814		1.03	1.11	0.83	0.99	0.27	0.31	0.21	0.28	0.75	0.8	0.23	1.03									0.4206	0.246	0.5947	0.7259	0.5843	0.4535	0.8787	0.5333	0.0401	0.0787	0.0241	0.1061	0.0014	0.0044	0.0045	0.0176	0.9149	0.7134	0.7019
	89			1-ribosyl-imidazoleacetate*	LC/MS pos early	61868	C05131	HMDB02331	5117448		0.47	0.86	1.02	0.78	0.68	0.97	1.48	0.88	0.97	1.79	0.94	1.06									0.0006	0.0019	0.5271	0.6947	0.9078	0.5666	0.262	0.2595	0.1991	0.2049	0.8329	0.7183	0.0133	0.0262	0.4797	0.2795	0.7436	0.6709	0.0014
	90			4-imidazoleacetate	LC/MS pos early	32349	C02835	HMDB02024	96215		0.99	0.77	0.88	0.65	0.54	0.54	0.48	0.46	1.14	0.89	0.62	0.84									0.984	0.4177	0.3346	0.5802	0.4333	0.3814	0.1099	0.1529	0.027	0.0639	0.0128	0.0652	0.0041	0.0108	0.0024	0.0129	0.4452	0.5584	0.8532
	94			N-acetylhistamine	LC/MS pos early	48679	C05135	HMDB13253	69602		0.68	0.73	0.94	0.56	0.72	0.97	0.99	0.74	2.07	2.24	2.01	1.67									0.0394	0.0427	0.2073	0.4697	0.6171	0.4678	0.0254	0.0546	0.2518	0.2361	0.8015	0.7156	0.6375	0.4142	0.1993	0.1627	0.0018	0.0277	0.0002
	98		Lysine Metabolism	lysine	LC/MS pos early	1301	C00047	HMDB00182	5962		1.76	0.88	0.76	1.22	1.18	0.56	0.5	0.77	1.54	0.77	0.86	1.18									0.0017	0.0042	0.4945	0.6829	0.0784	0.1516	0.2423	0.2503	0.2284	0.224	0.002	0.0181	0.0003	0.0016	0.1463	0.1358	0.0116	0.0798	0.1617
	99			N2-acetyllysine	LC/MS polar	36751	C12989	HMDB00446	92907		1.71	0.69	0.9	1.4	0.96	0.53	0.51	1.08	1.85	0.75	0.98	1.59									0.0242	0.0286	0.087	0.3035	0.5912	0.4539	0.1248	0.164	0.9852	0.4986	0.0055	0.0366	0.0062	0.0147	0.7164	0.3528	0.008	0.0633	0.2017
	100			N6-acetyllysine	LC/MS polar	36752	C02727	HMDB00206	92832		1.39	0.8	0.78	1.12	1.47	0.74	0.82	1.03	1.55	0.89	1.14	1.12									0.0254	0.0297	0.1398	0.4049	0.0746	0.1473	0.3772	0.3244	0.0093	0.0321	0.0426	0.1554	0.1649	0.1782	0.7682	0.367	0.0044	0.044	0.4316
	104			N2,N6-diacetyllysine	LC/MS neg	48455			91827		1.13	0.68	0.7	1.2	1.12	0.55	0.69	0.98	1.4	0.84	0.77	1.19									0.374	0.228	0.0444	0.2328	0.0569	0.1285	0.4794	0.378	0.422	0.3254	0.0038	0.0274	0.0472	0.0723	0.7537	0.3628	0.052	0.196	0.3364
	106			N6-carboxyethyllysine	LC/MS polar	37458			22283604		0.45	1.02	0.99	1.26	1.12	1.12	2.47	1.38	1.03	2.34	1.15	1.31									4.6397e-05	0.0003	0.7995	0.781	0.959	0.5782	0.1642	0.1992	0.5686	0.3738	0.448	0.5751	7.4845e-06	8.2693e-05	0.0618	0.0816	0.9252	0.7187	1.6771e-05
	107			N6-methyllysine	LC/MS pos early	62860	C02728	HMDB02038	164795		1.13	0.99	1.15	0.89	2.17	1.31	2.21	1.17	1.27	1.11	1.66	0.59									0.3501	0.2164	0.917	0.8008	0.312	0.3171	0.4559	0.3656	8.6304e-06	0.0002	0.1025	0.2513	6.8555e-06	8.0199e-05	0.3102	0.2179	0.0775	0.257	0.4467
	108			N6,N6-dimethyllysine	LC/MS pos early	62862	C05545	HMDB13287	193344		1.16	0.93	1.2	1.06	1.54	1.17	1.6	1.33	1.37	1.11	1.61	0.92									0.1007	0.0877	0.4327	0.6541	0.0351	0.1025	0.5158	0.3939	4.31e-05	0.0006	0.0928	0.2324	9.7884e-06	0.0001	0.0032	0.0159	0.0012	0.0236	0.2908
	109			N6,N6,N6-trimethyllysine	LC/MS pos early	1498	C03793	HMDB01325	440120		1.08	0.9	1.16	1.01	1.11	1.1	1.2	1.24	1.16	0.97	1.28	1.01									0.3376	0.2099	0.2414	0.5075	0.0634	0.1352	0.919	0.5458	0.1867	0.1976	0.1761	0.3527	0.0282	0.0471	0.0116	0.0307	0.0855	0.275	0.6971
	110			hydroxy-N6,N6,N6-trimethyllysine*	LC/MS pos early	62959					0.78	0.8	1.04	0.98	0.86	0.96	1.15	1.18	1.33	1.37	1.28	1.4									0.1941	0.1419	0.2723	0.5481	0.9025	0.5641	0.8975	0.539	0.4711	0.3415	0.7223	0.6779	0.4764	0.3516	0.534	0.3003	0.1564	0.3661	0.1065
	111			5-hydroxylysine	LC/MS pos early	15685	C16741	HMDB00450	1029		1.41	0.87	1.2	0.78	1.52	1.31	1.3	1.17	1.53	0.94	2	0.85									0.0003	0.0011	0.1287	0.3855	0.0321	0.0961	0.0053	0.017	3.0081e-05	0.0005	0.0027	0.0219	0.005	0.0124	0.078	0.0941	1.9283e-05	0.0018	0.5317
	112			5-(galactosylhydroxy)-L-lysine	LC/MS pos early	43582			123986		1.56	0.93	1.25	0.91	1.8	1.3	1.43	1.27	1.61	0.96	2.1	0.86									4.4414e-06	4.8555e-05	0.3705	0.6164	0.0087	0.0467	0.266	0.2614	1.8491e-08	2.3342e-06	0.0024	0.0204	4.5772e-05	0.0003	0.0044	0.0176	7.703e-07	0.0002	0.7627
	113			fructosyllysine	LC/MS pos early	46227			123708		1.59	0.79	0.74	1.1	1.05	0.7	0.49	0.98	1.28	0.63	0.9	1.27									0.0007	0.0022	0.0806	0.2925	0.0205	0.0758	0.4697	0.3738	0.67	0.406	0.0078	0.0462	2.3347e-06	3.4393e-05	0.764	0.3656	0.0515	0.1954	0.0014
	115			2-aminoadipate	LC/MS polar	6146	C00956	HMDB00510	469		2.27	1.94	1.25	1.1	0.94	0.24	0.52	0.14	3.48	2.96	0.84	0.78									0.0563	0.056	0.8433	0.7873	0.6379	0.475	0.8793	0.5333	0.9273	0.4834	0.0435	0.1566	0.1201	0.1414	0.0394	0.0632	0.0879	0.2807	0.9836
	117			2-oxoadipate	LC/MS polar	38347	C00322	HMDB00225	71		1.71	2.65	1.08	1.16	0.91	0.14	0.57	0.06	5.63	8.73	0.76	0.91									0.3133	0.2019	0.8641	0.7879	0.8904	0.5621	0.8501	0.5284	0.9588	0.4924	0.052	0.1723	0.3554	0.2929	0.054	0.0757	0.1028	0.3006	0.414
	119			glutarylcarnitine (C5-DC)	LC/MS pos early	44664		HMDB13130	71464488		3.28	1.07	0.76	2.15	1.54	0.31	0.36	0.63	2.93	0.95	0.92	1.69									0.0003	0.0011	0.7648	0.7723	0.3387	0.3304	0.0576	0.0982	0.154	0.172	0.0011	0.0115	0.0011	0.0038	0.0637	0.0821	0.0018	0.0277	0.7225
	123			pipecolate	LC/MS pos early	1444	C00408	HMDB00070	849		1.05	1.22	0.68	1.84	1.13	0.58	0.73	0.88	1.01	1.17	0.59	1.41									0.7032	0.3383	0.1553	0.4269	0.0133	0.0584	0.0013	0.0071	0.399	0.3136	0.0024	0.0204	0.0391	0.0628	0.2311	0.1783	0.9405	0.7194	0.3268
	125			6-oxopiperidine-2-carboxylate	LC/MS neg	43231		HMDB61705	3014237		0.71	1.03	0.72	0.96	0.79	0.6	0.81	0.56	1.39	2.03	0.83	1.41									0.2437	0.1694	0.4665	0.6829	0.308	0.315	0.8166	0.5159	0.3891	0.3108	0.2099	0.3941	0.4759	0.3516	0.4433	0.2647	0.5311	0.5926	0.2865
	129			N,N-dimethyl-5-aminovalerate	LC/MS pos early	62819					0.66	1.04	0.22	2	1.23	1.14	0.41	2.19	0.53	0.84	0.6	4.47									0.5761	0.3006	0.8679	0.7879	0.0057	0.0344	0.1464	0.1844	0.443	0.3349	0.8311	0.7183	0.1141	0.1359	0.1344	0.1303	0.4067	0.5431	0.9144
	130			N,N,N-trimethyl-5-aminovalerate	LC/MS pos early	57687			14274897		0.74	1.26	0.71	1.27	0.25	0.36	0.24	0.37	0.89	1.51	0.32	2.28									0.2485	0.1709	0.3476	0.5909	0.1373	0.201	0.2824	0.2727	4.5263e-06	0.0001	0.0001	0.0029	1.6432e-06	2.8649e-05	0.0002	0.0024	0.85	0.6896	0.0615
	132		Phenylalanine Metabolism	phenylalanine	LC/MS pos early	64	C00079	HMDB00159	6140		1.03	1.01	1.11	0.91	0.92	0.94	1	0.84	1.18	1.16	1.11	0.98									0.5697	0.2986	0.9304	0.8033	0.1513	0.213	0.2113	0.228	0.3091	0.2695	0.3889	0.5331	0.8912	0.5021	0.0324	0.0553	0.023	0.1247	0.0663
	133			N-acetylphenylalanine	LC/MS neg	33950	C03519	HMDB00512	74839		0.66	0.77	0.83	0.67	1.15	1.29	1.43	1.12	1.14	1.33	1.47	1.04									0.0077	0.013	0.1053	0.3458	0.4529	0.3903	0.0186	0.0437	0.6838	0.411	0.1407	0.3042	0.0179	0.0336	0.4907	0.2836	0.3809	0.5344	0.047
	138			1-carboxyethylphenylalanine	LC/MS neg	62566					1.63	1	1.5	0.97	0.95	0.93	0.87	0.9	1.79	1.11	1.67	1.15									0.0731	0.0682	0.9805	0.81	0.0462	0.1177	0.905	0.5423	0.5753	0.3759	0.581	0.6208	0.7325	0.4502	0.6473	0.3336	0.0124	0.0809	0.417
	142			phenylpyruvate	LC/MS neg	566	C00166	HMDB00205	997		1.07	0.97	1.03	1.53	0.95	0.43	0.92	0.68	0.85	0.77	0.37	0.57									0.6423	0.3221	0.652	0.7397	0.818	0.5388	0.4847	0.3787	0.9223	0.4828	0.0212	0.0961	0.7397	0.4519	0.2166	0.1714	0.8921	0.7009	0.2967
	143			phenyllactate (PLA)	LC/MS neg	22130	C05607	HMDB00779	3848		0.94	4.06	1.78	3.59	0.33	1.22	0.63	1.08	0.59	2.56	0.72	4.39									0.8188	0.3751	0.0004	0.0133	0.2299	0.2664	0.0019	0.0092	0.0062	0.0245	0.4507	0.5765	0.1502	0.166	0.8285	0.3855	0.1263	0.3337	0.0143
	147			phenylacetate	LC/MS neg	57745	C07086	HMDB00209	999		0.8	2.3	0.5	1.84	0.49	1.09	0.31	0.87	0.48	1.38	0.53	3.94									0.8437	0.3816	0.0388	0.2146	0.354	0.3386	0.5237	0.3944	0.4738	0.3424	0.5746	0.6187	0.0715	0.0984	0.3527	0.232	0.2712	0.4688	0.4091
	148			2-hydroxyphenylacetate	LC/MS polar	1432	C05852	HMDB00669	11970		0.73	1	0.63	1.94	0.84	0.67	0.73	1.3	1.05	1.43	0.71	2.57									0.3778	0.2292	0.9933	0.8125	0.3038	0.3142	0.03	0.0624	0.3427	0.2853	0.1996	0.3758	0.2736	0.2468	0.3393	0.2281	0.8633	0.6912	0.2974
	151			4-hydroxyphenylacetate	LC/MS neg	541	C00642	HMDB00020	127		1.35	1.61	0.85	1.18	0.77	1.13	0.49	0.83	0.9	1.07	1.01	1.83									0.9799	0.4177	0.2029	0.4684	0.672	0.4865	0.5045	0.3885	0.5629	0.3738	0.9815	0.7543	0.3313	0.2792	0.5518	0.307	0.6653	0.6398	0.3809
	154		Tyrosine Metabolism	tyrosine	LC/MS pos early	1299	C00082	HMDB00158	6057		0.86	0.89	0.83	0.68	1.15	1.01	1.12	0.77	1.13	1.17	1.13	0.81									0.4785	0.2657	0.5328	0.6959	0.1981	0.2416	0.0217	0.0482	0.2249	0.2216	0.9816	0.7543	0.5265	0.3739	0.0881	0.1014	0.383	0.5344	0.3389
	155			N-acetyltyrosine	LC/MS neg	32390		HMDB00866	68310		0.59	0.86	0.8	0.49	1.36	1.6	1.87	0.91	1.03	1.53	1.66	0.75									0.0093	0.0147	0.4033	0.6413	0.365	0.3476	0.0011	0.0062	0.121	0.1478	0.0336	0.1307	0.0016	0.0052	0.6066	0.3241	0.6883	0.6467	0.0265
	156			1-carboxyethyltyrosine	LC/MS neg	62564					0.85	0.93	1.01	0.71	0.88	1.08	1.05	0.82	1.28	1.41	1.38	1.11									0.4652	0.2616	0.7147	0.7552	0.7354	0.5147	0.4207	0.3493	0.5851	0.3794	0.9047	0.7363	0.6008	0.4016	0.5743	0.312	0.2664	0.464	0.143
	160			tyramine	LC/MS pos early	1603	C00483	HMDB00306	5610		0.44	1.27	0.45	0.9	1.27	0.88	1.32	0.62	1.24	3.6	1.09	1.7									0.0488	0.05	0.3328	0.5801	0.0104	0.0519	0.8667	0.5333	0.2209	0.2184	0.5027	0.5958	0.5695	0.3908	0.1455	0.1358	0.3213	0.5018	0.0003
	165			4-hydroxyphenylpyruvate	LC/MS neg	1669	C01179	HMDB00707	979		0.88	0.99	1.08	0.65	1.07	1.09	1.31	0.72	0.55	0.62	0.59	0.34									0.9636	0.4139	0.6001	0.7266	0.5978	0.4566	0.2406	0.2503	0.8384	0.4608	0.8919	0.7355	0.4386	0.3342	0.6003	0.3228	0.3329	0.5028	0.1522
	170			3-(4-hydroxyphenyl)lactate	LC/MS neg	32197	C03672	HMDB00755	9378		0.55	1.07	0.99	0.96	0.75	1.04	1.35	0.94	1.06	2.07	1.1	1.44									0.0155	0.0212	0.7109	0.7551	0.9246	0.5745	0.971	0.558	0.1946	0.2019	0.8534	0.7265	0.1941	0.199	0.824	0.3845	0.7122	0.6556	0.0024
	177			phenol sulfate	LC/MS neg	32553	C02180	HMDB60015	74426		1.15	0.89	0.83	0.32	0.94	1.19	0.68	0.43	0.95	0.74	1.13	0.47									0.7521	0.3543	0.712	0.7551	0.957	0.5779	0.0385	0.0772	0.9392	0.4866	0.616	0.6383	0.6559	0.4208	0.0513	0.0731	0.8137	0.6846	0.8554
	188			vanillactate	LC/MS neg	54910		HMDB00913	160637		0.89	0.67	0.78	0.85	0.89	0.98	0.78	1.25	1.15	0.86	1.13	1.38									0.336	0.2093	0.2707	0.5481	0.5076	0.4181	0.5769	0.417	0.5028	0.3522	0.8126	0.7165	0.713	0.4453	0.4318	0.2611	0.738	0.6681	0.8478
	191			3-methoxytyrosine	LC/MS pos early	12017		HMDB01434	1670		1.52	0.98	0.78	0.47	1.08	1.77	0.55	0.84	0.64	0.41	1.13	0.62									0.4663	0.2616	0.8739	0.7884	0.3348	0.3303	0.0122	0.0313	0.4928	0.349	0.0544	0.1752	0.3141	0.2688	0.621	0.3265	0.2067	0.4069	0.0362
	206			gentisate	LC/MS polar	18280	C00628	HMDB00152	3469		0.42	2.1	1.24	2.08	0.43	1.12	1.25	1.11	0.65	3.22	0.73	2.87									0.1646	0.1267	0.0691	0.2809	0.9506	0.5771	0.144	0.1839	0.2085	0.2106	0.5029	0.5958	0.8417	0.4866	0.7703	0.3675	0.4579	0.5601	0.0157
	212			p-cresol glucuronide*	LC/MS neg	48841		HMDB11686	154035		0.62	1.38	0.37	1.27	0.28	0.27	0.17	0.25	0.5	1.12	0.14	1.66									0.3589	0.2208	0.0493	0.2413	0.3754	0.3493	0.1629	0.1981	0.7199	0.4233	0.3662	0.5249	0.0358	0.0584	0.1354	0.1309	0.4007	0.5384	0.7957
	214			N-formylphenylalanine	LC/MS neg	48433			759256		1.09	0.91	0.97	0.78	0.96	0.96	0.86	0.81	1.22	1.02	1.16	0.97									0.3289	0.2065	0.3281	0.5801	0.9383	0.5769	0.013	0.0332	0.6278	0.393	0.6701	0.6571	0.1289	0.1481	0.0469	0.0688	0.038	0.1625	0.8587
	215			vanillic alcohol sulfate	LC/MS neg	48733					0.54	0.62	0.88	0.89	0.91	0.91	1.48	1.32	1.41	1.62	1.29	1.44									0.0685	0.0652	0.2828	0.5543	0.5811	0.4524	0.9533	0.556	0.4493	0.3357	0.7078	0.6723	0.578	0.395	0.517	0.2943	0.4391	0.5541	0.1247
	224			catechol glucuronide	LC/MS neg	53243			75124209		0.67	0.97	1.41	1.33	0.2	0.29	0.43	0.4	0.67	0.97	0.2	0.91									0.8938	0.3952	0.4097	0.6433	0.7696	0.5301	0.8801	0.5333	0.0751	0.1166	0.3996	0.5398	0.1683	0.1809	0.0749	0.0911	0.4585	0.5601	0.8276
	234		Tryptophan Metabolism	tryptophan	LC/MS pos early	54	C00078	HMDB00929	6305		0.88	0.85	0.86	0.94	0.94	0.87	0.91	0.96	1.01	0.97	0.88	1.02									0.3108	0.2014	0.0985	0.3285	0.1662	0.2228	0.5992	0.4262	0.5658	0.3738	0.2643	0.4465	0.3406	0.2843	0.9724	0.4191	0.9433	0.7194	0.5526
	235			N-acetyltryptophan	LC/MS neg	33959	C03137	HMDB13713	700653		0.48	0.57	0.48	0.69	1.58	1.14	1.57	1.37	1.31	1.55	1.48	1.36									0.0013	0.0034	0.0112	0.0908	0.0025	0.021	0.0675	0.1061	0.0638	0.1046	0.3757	0.5262	0.0381	0.0614	0.0992	0.1089	0.1956	0.3961	0.0389
	241			C-glycosyltryptophan	LC/MS pos early	48782			10981970		1.15	1.05	1.22	0.93	1.73	1.63	1.83	1.45	1.15	1.05	1.88	0.83									0.2789	0.185	0.5695	0.7131	0.102	0.1714	0.5973	0.426	8.7214e-05	0.0011	0.0002	0.0035	1.6172e-05	0.0001	0.0039	0.0176	0.298	0.4781	0.599
	245			kynurenine	LC/MS pos early	15140	C00328	HMDB00684	161166		0.45	0.92	1.03	1.1	0.66	0.97	1.52	1.16	1.24	2.52	1.2	1.92									0.003	0.0063	0.4132	0.6449	0.8092	0.5388	0.9232	0.5467	0.1174	0.1463	0.966	0.7497	0.0735	0.1005	0.3397	0.2281	0.4489	0.5601	0.0035
	247			N-acetylkynurenine (2)	LC/MS neg	48757					0.42	0.68	0.39	1.09	0.73	0.57	0.68	0.91	1.59	2.56	0.9	3.43									0.0037	0.0074	0.2313	0.4958	0.0176	0.0702	0.9086	0.5426	0.1386	0.161	0.089	0.2251	0.3782	0.3045	0.679	0.3428	0.1306	0.3359	0.0015
	249			kynurenate	LC/MS neg	1417	C01717	HMDB00715	3845		0.67	0.89	0.6	0.77	1.09	1.11	0.98	0.96	1.33	1.74	1.47	1.72									0.1615	0.1249	0.6797	0.7491	0.1438	0.2065	0.2084	0.2271	0.951	0.4912	0.5902	0.623	0.9971	0.5289	0.7485	0.3619	0.2929	0.4781	0.045
	251			N-formylanthranilic acid	LC/MS neg	43549	C05653	HMDB04089	101399		1	1.34	0.84	1.8	0.66	0.59	0.55	0.79	0.92	1.23	0.54	1.78									0.9218	0.4008	0.2847	0.5549	0.4496	0.3899	0.0986	0.1402	0.1107	0.1412	0.132	0.292	0.0277	0.0467	0.3581	0.2332	0.7071	0.6543	0.4251
	254			3-hydroxykynurenine	LC/MS pos early	22110	C02794	HMDB00732	89		1.42	1.5	0.75	0.28	7.21	5.6	3.83	1.04	0.97	1.03	5.44	0.28									0.6146	0.3117	0.8324	0.7873	0.4166	0.3728	0.011	0.0291	4.6649e-05	0.0006	0.0033	0.0253	0.002	0.0059	0.7923	0.3735	0.9492	0.7207	0.8188
	259			picolinate	LC/MS pos early	1512	C10164	HMDB02243	1018		0.81	1.12	1.18	0.91	0.93	1.05	1.35	0.85	0.95	1.32	1	0.83									0.3157	0.2025	0.9816	0.81	0.3639	0.3473	0.5243	0.3944	0.6317	0.3941	0.8232	0.7165	0.155	0.1693	0.6615	0.3366	0.8855	0.6977	0.3762
	264			serotonin	LC/MS pos early	2342	C00780	HMDB00259	5202		0.79	1.36	0.67	1.33	1.81	1.03	1.54	1	0.96	1.65	0.98	1.07									0.1804	0.1344	0.1795	0.446	0.0539	0.1251	0.0793	0.1184	0.0111	0.0359	0.7372	0.6886	0.0471	0.0723	0.9195	0.4028	0.8382	0.6854	0.0163
	265			N-acetylserotonin	LC/MS pos early	1500	C00978	HMDB01238	903		0.26	1.88	0.41	1.26	0.76	1.23	1.18	0.82	0.88	6.33	1.08	4.41									0.0105	0.0159	0.1863	0.4548	0.0363	0.1045	0.104	0.1464	0.8078	0.4491	0.445	0.5733	0.7742	0.4638	0.6554	0.3358	0.9606	0.7207	0.0002
	267			5-hydroxyindoleacetate	LC/MS pos early	437	C05635	HMDB00763	1826		0.79	1.19	0.78	0.74	0.99	1.29	0.98	0.8	1.38	2.07	1.78	1.69									0.1801	0.1344	0.2169	0.4821	0.1559	0.2149	0.2036	0.2256	0.9596	0.4924	0.1976	0.3758	0.8942	0.5021	0.2233	0.1736	0.1693	0.3713	0.0003
	269			tryptamine	LC/MS pos early	6104	C00398	HMDB00303	1150		0.33	1.37	0.4	1.31	0.79	0.76	0.98	0.73	1.67	6.99	1.26	5.17									0.0031	0.0065	0.5418	0.7033	0.0029	0.0225	0.3385	0.306	0.9785	0.4986	0.3061	0.4846	0.9978	0.5289	0.4982	0.2856	0.0076	0.0618	1.6015e-07
	271			indolelactate	LC/MS neg	18349	C02043	HMDB00671	92904		0.42	1.61	0.64	1.81	0.59	0.76	0.89	0.86	0.92	3.5	0.7	3.37									0.0022	0.0051	0.0762	0.2925	0.1083	0.1771	0.019	0.0438	0.0371	0.0751	0.2897	0.4738	0.6169	0.4058	0.6637	0.3366	0.9384	0.7194	1.5912e-05
	272			indoleacetate	LC/MS neg	27513	C00954	HMDB00197	802		0.58	1.08	0.61	1	0.85	0.77	0.89	0.71	0.81	1.52	0.62	1.21									0.0454	0.0472	0.7217	0.7587	0.0659	0.1378	0.8155	0.5159	0.3795	0.3049	0.3754	0.5262	0.4809	0.3522	0.1451	0.1358	0.5023	0.5757	0.0874
	275			indolepropionate	LC/MS neg	32405		HMDB02302	3744		0.3	3.37	1.2	2.48	0.28	1.27	1.12	0.93	0.21	2.38	0.27	1.99									0.2621	0.1772	0.0259	0.1604	0.6959	0.4973	0.1248	0.164	0.2898	0.2594	0.3357	0.5013	0.7441	0.4531	0.8298	0.3855	0.0294	0.1422	0.2397
	280			indole-3-carboxylate	LC/MS neg	38116	C19837	HMDB03320	69867		0.97	0.98	1.23	0.65	1.33	1.52	1.67	1.01	0.93	0.93	1.42	0.56									0.999	0.4212	0.9245	0.8028	0.1824	0.2347	0.0081	0.0227	0.1114	0.1416	0.012	0.0632	0.0052	0.0128	0.949	0.4113	0.6903	0.6475	0.6231
	285			7-hydroxyindole sulfate	LC/MS neg	52915					0.32	0.42	0.91	2.1	0.03	0.02	0.09	0.1	1.09	1.44	0.02	1.51									0.0341	0.0378	0.4956	0.6829	0.7731	0.5303	0.2033	0.2256	3.7463e-06	0.0001	8.3437e-07	8.2523e-05	0.0009	0.0033	0.0003	0.0027	0.8303	0.6853	0.2001
	286			3-indoxyl sulfate	LC/MS neg	27672		HMDB00682	10258		0.49	1.61	0.6	1.9	0.77	0.93	0.93	1.1	0.71	2.31	0.66	2.72									0.2067	0.149	0.1676	0.4288	0.2293	0.2664	0.1421	0.1822	0.449	0.3357	0.978	0.7538	0.4869	0.3547	0.9043	0.401	0.4758	0.5664	0.0565
	294		Leucine, Isoleucine and Valine Metabolism	leucine	LC/MS pos early	60			6106		1.15	1.09	1.1	1.17	0.88	0.82	0.85	0.87	1.18	1.12	0.96	1.16									0.125	0.1008	0.3689	0.6155	0.2471	0.2797	0.1306	0.1711	0.2033	0.2069	0.0549	0.1752	0.0997	0.1228	0.1858	0.1562	0.0809	0.265	0.2636
	295			N-acetylleucine	LC/MS neg	1587	C02710	HMDB11756	70912		0.78	0.92	0.91	0.96	0.95	0.87	1.1	0.9	1.13	1.33	0.98	1.09									0.2061	0.1489	0.6622	0.7403	0.894	0.5628	0.9362	0.5499	0.5321	0.363	0.3917	0.5342	0.6035	0.4023	0.615	0.326	0.4816	0.5664	0.1283
	299			1-carboxyethylleucine	LC/MS neg	62559					1.16	1.12	1.08	1.12	0.85	0.89	0.8	0.9	1.96	1.89	1.75	2.13									0.3599	0.2208	0.6542	0.7397	0.5995	0.4572	0.5482	0.4036	0.4342	0.3315	0.5766	0.6187	0.2426	0.2299	0.6849	0.3452	0.0023	0.0278	0.0078
	301			4-methyl-2-oxopentanoate	LC/MS neg	22116	C00233	HMDB00695	70		1.15	1.47	1.14	1.23	0.85	0.81	0.85	0.68	0.75	0.97	0.61	0.78									0.2723	0.1813	0.0048	0.0605	0.2702	0.2925	0.1779	0.2105	0.1933	0.2017	0.1993	0.3758	0.1949	0.1993	0.0057	0.02	0.0312	0.1498	0.7377
	305			alpha-hydroxyisocaproate	LC/MS neg	22132	C03264	HMDB00746	83697		0.91	4.56	1.52	3.02	0.46	0.76	0.77	0.5	0.86	4.32	0.66	2.85									0.8111	0.3732	2.9543e-05	0.003	0.2247	0.2645	0.0012	0.0065	0.0265	0.0633	0.6061	0.6324	0.4028	0.3162	0.0787	0.0946	0.4846	0.5687	0.0001
	309			isovalerate (i5:0)	LC/MS neg	44656	C08262	HMDB00718	10430		1.11	0.72	1.55	1.57	0.87	0.38	1.21	0.82	1.5	0.97	0.57	0.66									0.5375	0.2878	0.2073	0.4697	0.0376	0.1062	0.0506	0.0916	0.6699	0.406	0.0001	0.0029	0.273	0.2468	0.3171	0.2199	0.0627	0.2211	0.9855
	312			isovalerylcarnitine (C5)	LC/MS pos early	34407		HMDB00688	6426851		1.19	1.17	1.25	1.82	0.3	0.54	0.31	0.84	1.21	1.19	0.65	3.2									0.5472	0.2906	0.3189	0.5776	0.2094	0.2491	0.0634	0.1027	6.6195e-05	0.0008	0.1167	0.2743	0.0004	0.0019	0.4879	0.2828	0.6957	0.6503	0.4303
	319			beta-hydroxyisovalerate	LC/MS neg	12129		HMDB00754	69362		0.91	1.33	1.31	1.13	0.93	0.93	1.34	0.79	1.64	2.41	1.53	1.43									0.9674	0.4139	0.4249	0.6496	0.3319	0.3303	0.6659	0.4551	0.8528	0.4625	0.6192	0.6383	0.4546	0.3445	0.3884	0.2429	0.1004	0.2968	0.0195
	322			3-methylglutaconate	LC/MS polar	38667		HMDB00522	1551553		2.57	0.44	1.73	0.48	0.64	0.81	0.43	0.89	1.51	0.26	1.23	0.53									0.0049	0.0094	0.1365	0.3991	0.2599	0.2884	0.0118	0.031	0.856	0.4625	0.8208	0.7165	0.048	0.0732	0.1799	0.1542	0.1674	0.3709	0.0037
	339			isoleucine	LC/MS pos early	1125	C00407	HMDB00172	6306		1.05	1.09	1.15	1.17	0.9	0.83	0.98	0.89	1.22	1.27	1.02	1.15									0.5594	0.2956	0.4792	0.6829	0.1549	0.2149	0.1526	0.1878	0.3031	0.2676	0.0844	0.2222	0.8584	0.4906	0.31	0.2179	0.0463	0.1811	0.0352
	341			N-acetylisoleucine	LC/MS neg	33967		HMDB61684	306109		0.54	0.8	0.66	0.95	1.06	0.98	1.28	1.15	1.15	1.69	1.12	1.52									0.0023	0.0052	0.2404	0.5071	0.0858	0.1579	0.8245	0.5201	0.9365	0.4859	0.9476	0.7484	0.1543	0.1691	0.3714	0.2363	0.5081	0.5765	0.0089
	345			1-carboxyethylisoleucine	LC/MS neg	62558					1.09	0.88	1.47	1.18	0.69	0.66	0.93	0.89	1.7	1.37	1.12	1.32									0.8412	0.3813	0.5305	0.6959	0.0371	0.1056	0.3748	0.3237	0.0531	0.0936	0.0745	0.2086	0.9724	0.5248	0.7587	0.3641	0.0315	0.15	0.1674
	346			3-methyl-2-oxovalerate	LC/MS neg	15676	C00671	HMDB03736	47		1.2	1.34	1.21	1.15	0.91	0.81	0.93	0.7	0.94	1.05	0.76	0.79									0.1648	0.1267	0.0385	0.2146	0.1425	0.2054	0.3647	0.3195	0.5286	0.3627	0.1888	0.3665	0.5826	0.3963	0.0146	0.0335	0.6144	0.6225	0.8211
	347			2-hydroxy-3-methylvalerate	LC/MS neg	36746		HMDB00317	164623		1.06	6.47	2.14	5.26	0.43	0.95	0.86	0.77	0.85	5.17	0.81	4.66									0.7884	0.3659	1.6846e-06	0.0005	0.0527	0.1238	2.6406e-05	0.0004	0.015	0.0432	0.8174	0.7165	0.4121	0.3208	0.4808	0.2797	0.4366	0.5539	3.6578e-05
	349			2-methylbutyrylcarnitine (C5)	LC/MS pos early	45095		HMDB00378	6426901		0.86	1.02	1.24	1.59	0.49	0.59	0.71	0.92	1.2	1.42	0.71	1.86									0.5472	0.2906	0.9638	0.8079	0.1165	0.1833	0.0847	0.1252	0.0007	0.0049	0.0648	0.1909	0.1343	0.1518	0.8591	0.3912	0.5899	0.6201	0.2395
	355			3-hydroxy-2-ethylpropionate	LC/MS polar	32397		HMDB00396	188979		1.05	1.84	1.54	2.22	0.91	1.2	1.33	1.45	0.82	1.44	0.98	1.57									0.754	0.3547	0.0669	0.2768	0.1623	0.2189	0.0092	0.0249	0.6109	0.3872	0.5691	0.6187	0.5524	0.3868	0.156	0.1407	0.5855	0.6176	0.3108
	357			ethylmalonate	LC/MS polar	15765		HMDB00622	11756		0.99	0.98	1.35	1.05	0.99	1.05	1.35	1.12	0.79	0.79	0.83	0.65									0.9928	0.4202	0.8745	0.7884	0.0822	0.1552	0.8386	0.5265	0.8071	0.4491	0.5881	0.6228	0.1292	0.1481	0.5572	0.3085	0.2277	0.4272	0.2964
	358			methylsuccinate	LC/MS polar	15745		HMDB01844	10349		2.81	1.95	1.81	2.1	1.76	0.9	1.13	0.96	1.53	1.06	1.37	0.9									0.0008	0.0023	0.0073	0.0773	0.0273	0.0879	0.0078	0.0222	0.0418	0.0803	0.9412	0.7476	0.4774	0.3517	0.9229	0.4032	0.2258	0.4272	0.703
	364			valine	LC/MS pos early	1649	C00183	HMDB00883	6287		0.94	1.06	1.09	1.13	0.89	0.8	1.04	0.86	1.24	1.4	0.99	1.15									0.6258	0.3159	0.8244	0.7873	0.4239	0.377	0.3538	0.314	0.4082	0.3188	0.0838	0.2217	0.6454	0.415	0.2938	0.211	0.068	0.2367	0.0138
	365			N-acetylvaline	LC/MS neg	1591		HMDB11757	66789		0.93	0.99	0.95	0.91	1.13	0.96	1.15	0.89	1.32	1.39	1.27	1.07									0.5945	0.305	0.6535	0.7397	0.8261	0.5392	0.4752	0.3758	0.4165	0.3239	0.6988	0.6679	0.2629	0.2421	0.5142	0.2932	0.0412	0.1714	0.0342
	368			1-carboxyethylvaline	LC/MS neg	62562					1.12	1.09	1.24	1.14	0.93	0.83	1.03	0.86	1.99	1.93	1.64	1.61									0.685	0.3316	0.9028	0.7986	0.2722	0.2925	0.5498	0.4036	0.5815	0.3777	0.3268	0.4969	0.881	0.4985	0.6104	0.3245	0.0032	0.0357	0.0067
	370			3-methyl-2-oxobutyrate	LC/MS neg	44526	C00141	HMDB00019	49		1.13	1.44	1.38	1.09	0.96	0.93	1.17	0.71	0.88	1.12	0.82	0.68									0.4062	0.2404	0.0088	0.0832	0.0297	0.0919	0.5406	0.4003	0.8012	0.4484	0.7756	0.7057	0.2466	0.2313	0.0195	0.0385	0.246	0.4484	0.4491
	371			alpha-hydroxyisovalerate	LC/MS neg	33937		HMDB00407	99823		0.72	2.39	1.61	2.83	0.42	0.78	0.94	0.93	0.98	3.25	0.76	3.22									0.247	0.1706	0.0022	0.0366	0.1003	0.1706	0.0036	0.0137	0.0068	0.0256	0.7569	0.6954	0.9803	0.5262	0.6196	0.3265	0.6294	0.6291	0.0003
	373			isobutyrylcarnitine (C4)	LC/MS pos early	33441		HMDB00736	168379		0.99	1.17	0.86	2.54	0.26	0.5	0.22	1.08	1.28	1.51	0.63	7.32									0.7268	0.3437	0.4748	0.6829	0.8205	0.5388	0.0192	0.044	0.0001	0.0014	0.1127	0.2682	0.0001	0.0007	0.9115	0.4026	0.3919	0.5346	0.2245
	375			3-hydroxyisobutyrate	LC/MS polar	1549	C06001	HMDB00336	87		1.18	0.97	1.14	1	1.06	0.91	1.03	0.94	1.07	0.88	0.98	0.8									0.2498	0.1711	0.8382	0.7873	0.4184	0.3736	0.8717	0.5333	0.6751	0.4078	0.5367	0.6145	0.9441	0.5192	0.5649	0.3102	0.6139	0.6225	0.3917
	376			2,3-dihydroxy-2-methylbutyrate	LC/MS polar	57547		HMDB29576	301941		0.74	1.23	1.53	1.32	0.49	1.03	1.01	1.11	0.8	1.33	0.83	1.46									0.1101	0.0926	0.3858	0.6266	0.0202	0.0758	0.2581	0.2574	0.0008	0.0056	0.829	0.7176	0.6904	0.4373	0.6276	0.3277	0.289	0.4781	0.1584
	381		Methionine, Cysteine, SAM and Taurine Metabolism	methionine	LC/MS pos early	1302	C00073	HMDB00696	6137		0.92	1.02	0.7	1.19	0.92	0.71	0.7	0.83	0.98	1.09	0.69	1.29									0.6828	0.3316	0.9225	0.8022	0.0571	0.1285	0.3406	0.3073	0.3949	0.3136	0.0582	0.1771	0.0212	0.0378	0.2817	0.2055	0.904	0.708	0.7
	382			N-acetylmethionine	LC/MS neg	1589	C02712	HMDB11745	448580		0.65	0.79	1.03	0.85	0.74	0.84	1.16	0.9	1.06	1.28	0.89	1									0.0667	0.064	0.3151	0.5776	0.8203	0.5388	0.9749	0.5588	0.135	0.1588	0.1302	0.2904	0.5565	0.3881	0.6197	0.3265	0.7568	0.6751	0.2426
	384			N-formylmethionine	LC/MS neg	2829	C03145	HMDB01015	439750		0.96	1.03	1.13	0.92	0.98	0.92	1.16	0.82	1.11	1.2	1.03	0.85									0.6595	0.3277	0.6675	0.741	0.2635	0.2909	0.5248	0.3944	0.8268	0.4571	0.4219	0.5623	0.1826	0.1906	0.0678	0.0861	0.4111	0.5446	0.0967
	385			S-methylmethionine	LC/MS pos early	38127	C05319	HMDB38670	458		0.32	1.15	1.46	0.38	0.28	1.36	1.29	0.45	0.93	3.39	1.27	1.19									0.0129	0.0181	0.8017	0.781	0.8346	0.5439	0.019	0.0438	0.0024	0.012	0.621	0.6383	0.3929	0.3113	0.0332	0.0564	0.9531	0.7207	0.006
	386			methionine sulfone	LC/MS pos early	44878			69961		0.49	1.02	0.7	0.84	1.91	1.1	2.7	0.9	0.97	2.01	1.06	0.67									3.3151e-06	4.0423e-05	0.9138	0.8003	0.0102	0.0513	0.1719	0.205	3.149e-05	0.0005	0.5658	0.6187	8.286e-09	4.7082e-07	0.3612	0.234	0.8832	0.6977	3.7128e-06
	387			methionine sulfoxide	LC/MS pos early	18374	C02989	HMDB02005	158980		0.65	1.11	0.61	1.2	0.9	0.69	0.84	0.74	1.05	1.8	0.72	1.58									0.029	0.0335	0.6272	0.7338	0.0296	0.0919	0.2929	0.2803	0.3064	0.268	0.031	0.1232	0.3103	0.2666	0.1031	0.1112	0.7619	0.6782	0.0042
	388			N-acetylmethionine sulfoxide	LC/MS pos early	45428			193368		0.29	0.91	0.55	0.82	1.06	0.86	1.98	0.78	1.15	3.56	1	1.41									4.3955e-05	0.0003	0.5927	0.7248	0.0629	0.1349	0.5328	0.3973	0.717	0.4223	0.3874	0.5331	0.0207	0.0374	0.3411	0.2281	0.5605	0.6045	3.8266e-05
	393			S-adenosylhomocysteine (SAH)	LC/MS neg	42382	C00021	HMDB00939	439155		1.06	1.07	1.38	0.51	1.18	1.85	1.54	0.89	0.8	0.81	1.48	0.47									0.8264	0.3775	0.6644	0.7403	0.2842	0.3003	0.0047	0.0161	0.4957	0.3496	0.0537	0.1752	0.1292	0.1481	0.1501	0.1381	0.3831	0.5344	0.5092
	394			5-methylthioribose**	LC/MS pos early	62100		HMDB01087	494		1.27	1	0.47	0.73	1.96	1.2	0.73	0.88	1.15	0.91	1.38	1.09									0.3352	0.2092	0.9742	0.81	0.0001	0.0028	0.1117	0.1544	0.0074	0.0277	0.4882	0.5938	0.02	0.0367	0.3738	0.2363	0.5389	0.5953	0.6994
	395			2,3-dihydroxy-5-methylthio-4-pentenoate (DMTPA)*	LC/MS neg	62805					0.94	0.88	0.97	1.02	0.97	0.76	1	0.88	0.96	0.9	0.73	0.79									0.7008	0.3377	0.52	0.688	0.8953	0.5628	0.9067	0.5423	0.7787	0.4417	0.0887	0.2251	0.9776	0.5262	0.3311	0.2262	0.6371	0.6311	0.4652
	396			2-hydroxy-4-(methylthio)butanoic acid	LC/MS polar	63739					0.55	2.27	1.01	2.65	0.49	1.59	0.89	1.85	0.62	2.56	0.99	5.34									0.0913	0.0802	0.0187	0.1264	0.8044	0.5388	0.0052	0.0169	0.0173	0.0486	0.2526	0.438	0.6074	0.4024	0.1009	0.1099	0.1529	0.365	0.0096
	399			homocystine	LC/MS pos early	22204	C01817	HMDB00676	439579		1.28	0.82	1.9	0.6	4.33	7.27	6.45	5.29	0.89	0.57	6.45	0.47									0.6254	0.3159	0.4411	0.6605	0.0192	0.0748	0.035	0.0709	3.9061e-06	0.0001	2.807e-08	8.7861e-06	1.4116e-08	7.0185e-07	1.6211e-06	0.0001	0.7549	0.6751	0.1222
	400			cystathionine	LC/MS pos early	15705	C02291	HMDB00099	439258		0.76	1.1	1.17	0.84	1.49	2.56	2.29	1.95	0.67	0.97	1.71	0.83									0.0242	0.0286	0.4707	0.6829	0.2864	0.3019	0.233	0.2459	0.0058	0.0234	8.6862e-08	1.6466e-05	3.3234e-07	8.8126e-06	2.3938e-05	0.0006	0.0057	0.0507	0.8922
	401			alpha-ketobutyrate	LC/MS polar	4968	C00109	HMDB00005	58		0.86	1.48	1.17	0.74	0.75	1.43	1.03	0.72	0.36	0.63	0.52	0.44									0.7149	0.3406	0.2996	0.5647	0.1881	0.2349	0.4034	0.3388	0.1052	0.137	0.3526	0.5141	0.9633	0.5242	0.3453	0.2286	0.0051	0.049	0.1231
	402			cysteine	LC/MS pos early	1868	C00097	HMDB00574	5862		1.07	0.95	1.33	0.8	1.12	1.73	1.38	1.46	1.05	0.93	1.82	0.98									0.8758	0.39	0.848	0.7873	0.1052	0.1748	0.2143	0.2297	0.4774	0.3437	0.0018	0.0174	0.016	0.0306	0.0266	0.0489	0.8533	0.6906	0.8811
	404			S-methylcysteine	LC/MS neg	39592		HMDB02108	24417		1.01	1.07	1.06	0.69	0.8	0.9	0.84	0.58	0.89	0.93	0.8	0.65									0.81	0.3732	0.7725	0.7736	0.9388	0.5769	0.1494	0.1863	0.4684	0.3415	0.8118	0.7165	0.6815	0.4337	0.1636	0.144	0.5598	0.6045	0.5276
	405			S-methylcysteine sulfoxide	LC/MS pos early	43378		HMDB29432	82142		1.5	1.1	0.6	0.81	1.4	0.76	0.56	0.56	1.04	0.77	0.8	0.77									0.0383	0.0418	0.8701	0.7879	0.0078	0.0441	0.2063	0.2264	0.071	0.1138	0.2464	0.4358	0.0037	0.0098	0.0128	0.0321	0.9944	0.727	0.0538
	407			cysteine s-sulfate	LC/MS polar	22176	C05824	HMDB00731	115015		0.5	0.8	0.59	0.39	1.75	1.15	2.06	0.56	0.66	1.05	0.76	0.29									0.0102	0.0157	0.4279	0.6505	0.0299	0.0919	0.003	0.012	0.0216	0.0552	0.7726	0.7045	0.0071	0.0164	0.042	0.0654	0.2218	0.4244	0.4996
	408			cystine	LC/MS pos early	56	C00491	HMDB00192	67678		0.49	0.99	1.1	0.91	0.82	0.98	1.83	0.9	0.85	1.71	0.83	0.84									0.0063	0.0114	0.9601	0.8063	0.8243	0.5388	0.7715	0.4991	0.6095	0.3872	0.996	0.7563	0.0129	0.0256	0.8061	0.3775	0.5963	0.622	0.0257
	412			lanthionine	LC/MS pos early	42002			98504		0.87	3.03	1.84	2.52	0.88	2.23	1.85	1.85	0.68	2.38	1.52	2.37									0.1796	0.1344	2.4842e-05	0.003	0.0135	0.0587	0.0002	0.0017	0.514	0.3565	0.0023	0.0198	0.0022	0.0064	0.0133	0.0326	0.091	0.2811	7.259e-05
	416			hypotaurine	LC/MS pos early	590	C00519	HMDB00965	107812		2.58	0.56	2.55	0.75	1.15	1.32	1.13	1.79	1.3	0.28	1.73	0.44									0.0017	0.0042	0.0803	0.2925	0.0007	0.0082	0.2414	0.2503	0.6036	0.3861	0.1062	0.2559	0.3883	0.3095	0.0297	0.0525	0.5285	0.5922	6.4188e-05
	417			taurine	LC/MS pos early	2125	C00245	HMDB00251	1123		1.24	0.74	0.55	0.77	1.11	0.65	0.49	0.68	1.03	0.61	0.67	0.84									0.317	0.2025	0.1274	0.3846	0.0061	0.0366	0.1878	0.2167	0.3458	0.2865	0.0469	0.1639	0.0052	0.0129	0.0739	0.0904	0.624	0.6273	0.045
	419			N-acetyltaurine	LC/MS neg	48187			159864		1.65	1.1	0.93	0.83	1.71	0.95	0.96	0.71	1.26	0.84	1.19	0.62									0.0127	0.0181	0.9336	0.8033	0.7328	0.5142	0.3643	0.3195	0.0058	0.0234	0.7693	0.7045	0.9797	0.5262	0.2029	0.1641	0.1703	0.3713	0.2569
	420			succinoyltaurine	LC/MS polar	63678					1.09	0.79	0.72	0.61	1.98	0.64	1.31	0.49	1.2	0.86	0.77	0.32									0.5231	0.2816	0.2622	0.5385	0.1067	0.1753	0.0495	0.0904	0.0082	0.0299	0.1159	0.2734	0.6119	0.4036	0.017	0.0362	0.4471	0.5594	0.3167
	423			3-sulfo-L-alanine	LC/MS polar	47089	C00506	HMDB02757	72886		0.32	0.77	0.44	0.69	3.17	1.35	4.32	1.2	1.48	3.57	2.01	1									0.015	0.0205	0.4872	0.6829	0.0035	0.025	0.3043	0.2885	0.0004	0.0029	0.3879	0.5331	0.0018	0.0056	0.5969	0.3216	0.1372	0.3429	0.0019
	425		Urea cycle; Arginine and Proline Metabolism	arginine	LC/MS pos early	1638	C00062	HMDB00517	232		1.05	0.96	1.04	0.92	1.12	1.15	1.1	1.1	1.08	0.99	1.25	0.98									0.5027	0.2737	0.6478	0.7397	0.6397	0.4755	0.3243	0.3008	0.1984	0.2047	0.1287	0.2904	0.2761	0.2473	0.3156	0.2198	0.3429	0.5109	0.8612
	426			argininosuccinate	LC/MS pos early	15497	C03406	HMDB00052	16950		1.87	1.35	1.65	1.28	2.11	1.21	1.86	1.16	2.08	1.49	2.52	0.92									0.0158	0.0215	0.2324	0.4958	0.0928	0.1655	0.1832	0.2126	0.0026	0.0126	0.5413	0.6145	0.0199	0.0367	0.4525	0.2671	0.0055	0.0495	0.11
	427			urea	LC/MS pos early	1670	C00086	HMDB00294	1176		0.36	0.39	0.57	1.26	0.42	0.16	0.67	0.52	2.21	2.43	0.35	1.89									0.0346	0.0381	0.0414	0.2244	0.336	0.3303	0.8753	0.5333	0.0992	0.1345	0.0007	0.0084	0.6431	0.4145	0.1452	0.1358	0.1296	0.3359	0.1113
	429			ornithine	LC/MS pos early	1493	C00077	HMDB03374	6262		0.93	1.59	1	1.63	0.65	0.58	0.7	0.6	1.23	2.11	0.72	1.81									0.7199	0.3416	0.0794	0.2925	0.8858	0.5608	0.0597	0.1001	0.0494	0.0898	0.0262	0.1118	0.1344	0.1518	0.0359	0.0588	0.3356	0.5028	0.0035
	431			3-amino-2-piperidone	LC/MS pos early	62853		HMDB00323	5200225		0.4	1.54	1.04	1.63	0.45	0.67	1.15	0.71	0.79	3.02	0.53	1.86									0.0005	0.0016	0.0774	0.2925	0.6598	0.4816	0.0454	0.0856	0.0012	0.0067	0.085	0.2229	0.4479	0.3407	0.1383	0.1318	0.4202	0.5471	2.6555e-05
	433			2-oxoarginine*	LC/MS pos early	55072	C03771	HMDB04225	558		0.89	1.15	0.97	0.79	1.22	1.48	1.32	1.01	1.1	1.43	1.63	1.09									0.6639	0.3289	0.6877	0.7495	0.6215	0.4678	0.5368	0.3996	0.37	0.3	0.2251	0.4143	0.402	0.3162	0.8375	0.3858	0.6754	0.6402	0.2144
	434			citrulline	LC/MS pos early	2132	C00327	HMDB00904	9750		1.14	2.03	0.97	1.9	1.13	0.99	0.96	0.93	0.86	1.54	0.85	1.49									0.3647	0.2232	4.2593e-05	0.003	0.7012	0.4983	7.682e-05	0.0008	0.3599	0.2956	0.932	0.7453	0.7081	0.4444	0.7735	0.3684	0.3614	0.5241	0.0068
	435			homoarginine	LC/MS pos early	22137	C01924	HMDB00670	9085		1.95	0.23	0.66	0.62	7.26	1.52	2.47	4.14	3.68	0.43	5.59	0.72									0.0534	0.0535	0.0015	0.03	0.1868	0.2349	0.2689	0.2632	8.0021e-06	0.0002	0.2916	0.4738	0.059	0.0839	0.0017	0.011	0.0019	0.0278	0.0448
	436			homocitrulline	LC/MS polar	22138	C02427	HMDB00679	65072		1.25	0.87	1.64	1.79	1.38	1.1	1.81	2.27	1.54	1.07	1.69	1.34									0.2191	0.1558	0.4455	0.6654	0.0052	0.0336	0.0091	0.0249	0.1065	0.1381	0.5904	0.623	0.0018	0.0055	0.0003	0.0027	0.0182	0.1057	0.646
	437			proline	LC/MS pos early	1898	C00148	HMDB00162	145742		1.08	1.15	0.97	1.06	1.1	0.91	0.99	0.84	1.14	1.21	1.03	1.02									0.3889	0.2344	0.1628	0.4269	0.8668	0.556	0.6637	0.4551	0.3505	0.2891	0.3664	0.5249	0.9248	0.5135	0.0657	0.084	0.1943	0.3961	0.0691
	440			dimethylarginine (SDMA + ADMA)	LC/MS pos early	36808	C03626	HMDB01539	123831		0.93	0.9	1.18	0.83	1.36	1.32	1.73	1.22	1.28	1.24	1.69	0.87									0.2116	0.1517	0.0857	0.3005	0.0082	0.0455	0.003	0.012	9.9137e-06	0.0002	3.4517e-05	0.001	1.1942e-10	4.7501e-08	0.002	0.0124	0.0002	0.0074	0.0008
	441			N-acetylarginine	LC/MS pos early	33953	C02562	HMDB04620	67427		0.91	1.07	1.15	0.8	1.24	1.68	1.57	1.25	1.01	1.18	1.69	0.95									0.7673	0.3583	0.6885	0.7495	0.4061	0.3678	0.2101	0.2277	0.1154	0.1452	0.0034	0.026	0.0095	0.0205	0.1493	0.1378	0.7801	0.6805	0.3323
	446			N-acetylcitrulline	LC/MS neg	48434	C15532	HMDB00856	656979		0.42	7.94	1.6	3.01	0.55	1	2.13	0.38	0.42	7.94	0.42	1.41									0.1781	0.1338	1.6706e-05	0.003	0.6222	0.4678	0.0198	0.0452	0.3989	0.3136	1	0.7563	0.3156	0.2688	0.0137	0.033	0.1781	0.3799	1.6706e-05
	447			N-acetylproline	LC/MS pos early	34387			322640		0.39	0.74	0.8	0.77	0.7	0.76	1.45	0.8	1.3	2.48	0.99	1.36									0.0039	0.0077	0.2949	0.5647	0.8165	0.5388	0.4141	0.3451	0.1386	0.161	0.2898	0.4738	0.1848	0.1915	0.4078	0.2499	0.2664	0.464	0.0033
	448			N-delta-acetylornithine	LC/MS neg	43249			9920500		1.02	1.05	0.73	0.95	1.46	0.88	1.04	0.8	1.33	1.37	1.18	1.05									0.6483	0.3237	0.9538	0.804	0.1098	0.1784	0.7495	0.4927	0.0166	0.0469	0.5639	0.6187	0.6751	0.4303	0.3425	0.2282	0.0592	0.2127	0.1299
	449			N-alpha-acetylornithine	LC/MS pos early	32984	C00437	HMDB03357	439232		1.12	1.35	0.81	1.1	0.97	0.93	0.7	0.75	1.26	1.52	1.17	1.63									0.6691	0.3294	0.2993	0.5647	0.3453	0.3346	0.631	0.4397	0.8523	0.4625	0.7408	0.6886	0.1246	0.1441	0.3729	0.2363	0.2439	0.4475	0.0796
	450			N2,N5-diacetylornithine	LC/MS neg	43591			65977		0.92	0.86	0.74	0.95	1.37	0.84	1.1	0.92	1.42	1.33	1.2	1.12									0.5852	0.3016	0.4601	0.6758	0.2348	0.2707	0.6612	0.4548	0.1748	0.1902	0.4893	0.5938	0.4716	0.3516	0.696	0.3488	0.1141	0.3233	0.163
	453			trans-4-hydroxyproline	LC/MS pos early	32306	C01157	HMDB00725	5810		1.38	0.92	1.23	0.67	1.93	1.42	1.73	1.03	1.45	0.97	2.05	0.58									0.0129	0.0181	0.4946	0.6829	0.1214	0.1864	0.0049	0.0167	1.2187e-05	0.0002	0.0105	0.0586	0.0002	0.0012	0.7016	0.3488	0.0054	0.0495	0.7341
	455			pro-hydroxy-pro	LC/MS pos early	35127		HMDB06695	11673055		1.46	0.92	1.24	0.75	1.78	1.36	1.51	1.11	1.46	0.92	1.99	0.67									0.002	0.0046	0.5176	0.6863	0.053	0.1238	0.0182	0.0433	2.2949e-05	0.0004	0.0104	0.0586	0.0011	0.0038	0.3808	0.2393	0.0022	0.0278	0.4893
	458			N-methylproline	LC/MS pos early	37431			557		1	1.08	1.45	1.14	0.38	0.84	0.55	0.89	0.78	0.84	0.66	1.36									0.9005	0.3965	0.3195	0.5776	0.1878	0.2349	0.6199	0.4344	0.0046	0.02	0.9899	0.7563	0.0769	0.1041	0.6223	0.3265	0.3127	0.4935	0.8891
	459			N,N,N-trimethyl-alanylproline betaine (TMAP)	LC/MS pos early	62947					1.32	1.06	0.73	1.1	1.47	1.1	0.82	1.15	1.18	0.94	1.3	1.33									0.018	0.0233	0.7431	0.7688	0.0146	0.0613	0.3301	0.3017	0.0021	0.0107	0.4938	0.5938	0.0919	0.1161	0.1863	0.1562	0.1226	0.3294	0.5672
	462			argininate*	LC/MS pos early	57461		HMDB03148	160437		0.78	1.03	1.02	1.3	0.81	0.6	1.05	0.76	1.37	1.82	0.82	1.31									0.3024	0.1977	0.9291	0.8033	0.9567	0.5779	0.1812	0.2113	0.4146	0.323	0.0171	0.0809	0.8686	0.4936	0.2972	0.2121	0.0989	0.2938	0.0122
	467		Creatine Metabolism	guanidinoacetate	LC/MS pos early	43802	C00581	HMDB00128	763		1.5	0.25	2.59	0.46	3.14	2.49	5.43	4.52	1.96	0.33	4.88	0.27									0.5054	0.2737	0.0065	0.0722	0.2299	0.2664	0.1113	0.1543	0.0057	0.0234	0.058	0.1771	0.0013	0.0044	0.0028	0.0144	0.1373	0.3429	0.0473
	468			creatine	LC/MS pos early	27718	C00300	HMDB00064	586		1.98	1.16	1.18	1.15	0.87	0.73	0.52	0.72	1.19	0.7	0.87	0.98									0.002	0.0046	0.4961	0.6829	0.7309	0.5141	0.4752	0.3758	0.541	0.3658	0.1375	0.2997	0.0009	0.0034	0.1462	0.1358	0.3914	0.5346	0.0793
	469			creatinine	LC/MS pos early	513	C00791	HMDB00562	588		1.1	1	0.97	1	1.02	0.9	0.9	0.9	1.08	0.98	0.98	0.99									0.2634	0.1777	0.9455	0.8036	0.6838	0.4935	0.9927	0.5636	0.7938	0.448	0.2285	0.4179	0.2077	0.2088	0.2589	0.1933	0.3506	0.5167	0.7965
	476		Polyamine Metabolism	putrescine	LC/MS pos early	1408	C00134	HMDB01414	1045		0.51	0.51	1.42	0.45	0.45	2.24	1.25	2.01	0.64	0.63	1.42	1.01									0.0252	0.0296	0.0129	0.0978	0.1416	0.2047	0.0044	0.0154	0.0098	0.0334	0.0017	0.0163	0.2761	0.2473	0.0051	0.0188	0.1028	0.3006	0.0581
	477			N-acetylputrescine	LC/MS pos early	37496	C02714	HMDB02064	122356		1.01	1.54	1.22	0.73	0.89	1.63	1.08	0.77	0.58	0.88	0.94	0.63									0.436	0.2518	0.1202	0.3727	0.3692	0.3484	0.5162	0.3939	0.7578	0.4374	0.171	0.3477	0.6679	0.4271	0.4002	0.2457	0.1704	0.3713	0.5562
	482			N-acetyl-isoputreanine	LC/MS pos early	62309			131802901		0.75	0.87	3.35	1.45	0.4	1.06	1.77	1.79	0.88	1.01	0.94	1.02									0.42	0.246	0.6094	0.7276	1.4086e-05	0.0006	0.0761	0.1157	0.0027	0.0127	0.896	0.7355	0.0116	0.024	0.0185	0.0374	0.9728	0.7221	0.7915
	483			spermidine	LC/MS pos early	485	C00315	HMDB01257	1102		0.64	0.71	1.17	0.95	0.4	1.43	0.74	1.91	1.3	1.45	1.86	3.74									0.0748	0.0693	0.2623	0.5385	0.3334	0.3303	0.8277	0.5206	0.0005	0.0036	0.1292	0.2904	0.2949	0.2607	0.0186	0.0374	0.2837	0.4744	0.0827
	488			(N(1) + N(8))-acetylspermidine	LC/MS pos early	57814			123689;496		0.09	0.68	2.78	0.28	0.07	1.59	2.27	0.65	0.3	2.3	0.48	0.66									0.0129	0.0181	0.4238	0.6496	0.0662	0.1378	0.0607	0.1004	0.0129	0.0405	0.6184	0.6383	0.0659	0.0918	0.5326	0.3003	0.9881	0.727	0.0797
	490			spermine	LC/MS pos early	603	C00750	HMDB01256	1103		0.55	0.78	0.51	1.56	0.32	1.35	0.3	2.71	1.28	1.83	1.73	16.71									0.0756	0.0694	0.8714	0.7879	0.4047	0.3678	0.3382	0.306	0.0308	0.0682	0.5399	0.6145	0.2144	0.2121	0.0888	0.1015	0.4117	0.5446	0.0175
	492			N1,N12-diacetylspermine	LC/MS pos early	52987	C03413	HMDB02172	132680		0.18	0.59	9.52	0.43	0.04	1.59	1.83	1.18	0.12	0.38	0.19	0.24									0.1957	0.1427	0.5446	0.7033	0.0028	0.0219	0.2568	0.2573	0.0067	0.0256	0.4913	0.5938	0.1057	0.128	0.8785	0.3932	0.158	0.3661	0.4667
	493			5-methylthioadenosine (MTA)	LC/MS pos early	1419	C00170	HMDB01173	439176		1.52	1.29	1.25	0.83	1.6	1.15	1.31	0.74	0.65	0.55	0.75	0.31									0.0489	0.05	0.1635	0.4269	0.3715	0.3484	0.4401	0.3597	0.0394	0.0781	0.3989	0.5398	0.3213	0.2725	0.1856	0.1562	0.0766	0.2556	0.0199
	497			4-acetamidobutanoate	LC/MS pos early	1558	C02946	HMDB03681	18189		1.09	1.64	0.78	1.02	2.31	1.48	1.66	0.92	1.15	1.73	1.7	0.96									0.7067	0.3387	0.0185	0.126	0.2193	0.26	0.8721	0.5333	0.0009	0.006	0.0889	0.2251	0.0531	0.0782	0.5753	0.312	0.7352	0.6681	0.0202
	500		Guanidino and Acetamido Metabolism	4-guanidinobutanoate	LC/MS pos early	15681	C01035	HMDB03464	500		0.16	1.04	0.49	0.91	0.23	0.13	0.71	0.12	0.63	4.15	0.08	0.67									0.1011	0.0878	0.8129	0.7872	0.3848	0.3557	0.8783	0.5333	0.1945	0.2019	0.0032	0.0253	0.608	0.4024	0.004	0.0176	0.7667	0.6784	0.0899
	504		Glutathione Metabolism	glutathione, oxidized (GSSG)	LC/MS pos early	27727	C00127	HMDB03337	65359		6.47	1.65	0.78	0.72	1	1.63	0.12	0.71	0.77	0.2	1.25	1.17									0.1121	0.0938	0.329	0.5801	0.4745	0.4007	0.4515	0.3641	0.732	0.4278	0.2985	0.4795	0.0527	0.0781	0.4911	0.2836	0.8385	0.6854	0.4027
	507			cysteine-glutathione disulfide	LC/MS pos early	35159		HMDB00656	4247235		1.3	1.23	1.1	0.96	0.93	1.47	0.8	1.14	0.84	0.79	1.23	1.14									0.1494	0.1169	0.1997	0.4673	0.6424	0.4762	0.8069	0.5145	0.8914	0.4741	0.0208	0.0954	0.2603	0.2413	0.3875	0.2429	0.3544	0.5196	0.2763
	511			cysteinylglycine disulfide*	LC/MS pos early	62103		HMDB00709			0.62	0.72	0.83	0.82	0.62	0.72	0.82	0.82	0.62	0.72	0.45	0.72									0.1181	0.0962	0.2004	0.4673	0.4542	0.3906	0.6846	0.4628	0.0989	0.1345	0.2485	0.4358	0.4011	0.3162	0.7829	0.3713	0.1308	0.3359	0.2197
	513			5-oxoproline	LC/MS neg	1494	C01879	HMDB00267	7405		1	1.1	1.37	0.76	0.63	1.21	0.86	0.84	0.77	0.84	0.93	0.82									0.9143	0.4008	0.6645	0.7403	0.1561	0.2149	0.1197	0.1604	0.0093	0.0321	0.2974	0.4791	0.2363	0.2267	0.3358	0.227	0.1656	0.3709	0.3894
	514			2-aminobutyrate	LC/MS pos early	42374	C02261	HMDB00650	439691		1.87	2.27	1.34	1.48	0.93	1.02	0.67	0.67	0.82	1	0.84	1									0.001	0.0028	0.0001	0.0058	0.0913	0.1643	0.0386	0.0772	0.6308	0.3941	0.919	0.7435	0.0249	0.0425	0.0427	0.0655	0.2749	0.4692	0.7284
	516			2-hydroxybutyrate/2-hydroxyisobutyrate	LC/MS polar	52281			440864;11671		1.13	1.06	1.22	0.86	0.81	1.12	0.87	0.91	0.97	0.92	1.09	0.95									0.299	0.1959	0.6411	0.7397	0.0705	0.1422	0.1968	0.2233	0.065	0.1057	0.3129	0.4869	0.2815	0.2511	0.4508	0.267	0.8427	0.6857	0.4382
	518			ophthalmate	LC/MS pos early	34592		HMDB05765	7018721		4.33	2.45	1.61	1.19	0.86	0.99	0.32	0.48	0.88	0.5	0.88	0.75									4.3312e-05	0.0003	0.0068	0.0745	0.0433	0.1132	0.7624	0.4965	0.3771	0.3043	0.9512	0.7484	0.0013	0.0043	0.0124	0.032	0.7693	0.6785	0.0407
	562	Peptide	Gamma-glutamyl Amino Acid	gamma-glutamylalanine	LC/MS pos early	37063		HMDB29142	440103		1.15	1.04	1.02	0.63	1.48	1.41	1.31	0.85	1.04	0.95	1.47	0.61									0.3872	0.2342	0.84	0.7873	0.8816	0.5597	0.0053	0.017	0.0202	0.0539	0.042	0.1553	0.0956	0.1196	0.2897	0.209	0.7353	0.6681	0.7419
	564			gamma-glutamylglutamate	LC/MS pos early	36738	C05282	HMDB11737	92865		0.9	0.58	1.02	0.77	1.38	1.12	1.57	1.48	1.52	0.98	1.69	0.92									0.5519	0.2921	0.0018	0.0333	0.7993	0.5388	0.0617	0.101	0.0354	0.0741	0.3856	0.5331	0.0045	0.0116	0.025	0.0475	0.0088	0.0677	0.9872
	565			gamma-glutamylglutamine	LC/MS pos early	2730	C05283	HMDB11738	150914		0.77	0.86	0.72	0.68	1.29	1.22	1.2	0.96	0.93	1.05	1.13	0.84									0.1066	0.0904	0.3738	0.6185	0.044	0.1137	0.0029	0.012	0.1105	0.1412	0.1677	0.3459	0.2371	0.2267	0.3714	0.2363	0.6088	0.6225	0.8107
	566			gamma-glutamylglycine	LC/MS pos early	33949		HMDB11667	165527		1.06	0.99	0.66	1.15	0.98	0.69	0.61	0.8	1.2	1.12	0.83	1.48									0.5787	0.3006	0.9682	0.8096	0.0119	0.0539	0.5254	0.3944	0.9259	0.4834	0.031	0.1232	0.0022	0.0065	0.1077	0.1138	0.2281	0.4272	0.4841
	567			gamma-glutamylhistidine	LC/MS pos early	18245			7017195		0.5	0.81	0.67	0.76	0.77	0.92	1.05	0.86	0.93	1.53	0.86	1.26									0.0012	0.0031	0.2455	0.5126	0.0477	0.1183	0.0958	0.1378	0.203	0.2069	0.74	0.6886	0.8364	0.4842	0.3919	0.2429	0.8861	0.6977	0.0322
	568			gamma-glutamylisoleucine*	LC/MS pos early	34456		HMDB11170	14253342		0.67	1.07	0.82	1.52	0.89	0.73	1.08	1.03	1.39	2.2	1.01	2.1									0.0832	0.0745	0.891	0.7947	0.5518	0.436	0.068	0.1065	0.4804	0.3452	0.1685	0.3459	0.6394	0.4142	0.7348	0.3575	0.1205	0.3278	0.0013
	569			gamma-glutamylleucine	LC/MS pos early	18369		HMDB11171	151023		0.91	1.06	0.87	1.13	1	0.83	0.95	0.88	1.17	1.36	0.97	1.26									0.7009	0.3377	0.6635	0.7403	0.623	0.4678	0.6342	0.4412	0.7969	0.4483	0.4192	0.5609	0.715	0.4457	0.4428	0.2647	0.4633	0.5603	0.1265
	570			gamma-glutamyl-alpha-lysine	LC/MS pos early	55015			65254		1.45	0.91	0.66	1.2	1.41	0.59	0.64	0.78	1.4	0.88	0.83	1.07									0.0495	0.0503	0.6885	0.7495	0.0386	0.1071	0.4611	0.3684	0.0775	0.1187	0.0175	0.0823	0.0237	0.041	0.1849	0.1562	0.072	0.2469	0.5624
	571			gamma-glutamyl-epsilon-lysine	LC/MS pos early	33934		HMDB03869	7015685		1.41	0.96	0.84	1.52	1.32	0.67	0.78	1.06	1.26	0.86	0.85	1.16									0.0204	0.0256	0.7558	0.7708	0.136	0.1999	0.0078	0.0222	0.0576	0.0983	0.0095	0.0543	0.0541	0.079	0.6982	0.3488	0.1202	0.3278	0.2558
	572			gamma-glutamylmethionine	LC/MS pos early	44872		HMDB29155	7009567		0.75	1.05	0.63	0.86	0.85	0.62	0.72	0.51	0.69	0.96	0.43	0.69									0.2447	0.1698	0.8579	0.7873	0.0602	0.1317	0.3798	0.326	0.3055	0.268	0.0551	0.1752	0.0806	0.1076	0.0044	0.0176	0.1231	0.3294	0.8286
	573			gamma-glutamylphenylalanine	LC/MS pos early	33422		HMDB00594	111299		0.81	0.91	1.02	0.85	0.9	0.95	1.13	0.88	1.2	1.35	1.14	1.05									0.2191	0.1558	0.5839	0.7198	0.8698	0.557	0.3525	0.314	0.4771	0.3437	0.7539	0.695	0.4894	0.3558	0.4851	0.2816	0.2594	0.4636	0.0738
	574			gamma-glutamylthreonine	LC/MS pos early	33364		HMDB29159	76078708		0.88	0.76	0.89	0.79	1.12	0.96	1.13	1	1.19	1.03	1.14	0.91									0.7667	0.3583	0.1628	0.4269	0.5442	0.434	0.2364	0.2479	0.338	0.2832	0.9617	0.7492	0.5147	0.3682	0.8635	0.3919	0.2793	0.4714	0.9773
	575			gamma-glutamyltryptophan	LC/MS pos early	33947		HMDB29160	3989307		0.81	0.78	0.9	0.71	0.95	0.96	1.06	0.87	1.32	1.28	1.27	1.05									0.1859	0.1374	0.1527	0.4269	0.4821	0.4024	0.0179	0.0428	0.8607	0.4643	0.9582	0.7484	0.6459	0.415	0.3352	0.227	0.0722	0.2469	0.0904
	576			gamma-glutamyltyrosine	LC/MS pos early	2734		HMDB11741	94340		0.61	0.77	0.9	0.53	0.95	1.41	1.41	0.96	0.88	1.11	1.23	0.76									0.022	0.027	0.2546	0.5263	0.5574	0.439	0.0059	0.0185	0.9951	0.5018	0.1435	0.3079	0.0781	0.1053	0.7755	0.3684	0.5823	0.6171	0.4943
	577			gamma-glutamylvaline	LC/MS pos early	43829		HMDB11172	7015683		0.75	1.07	0.96	1.17	1.09	0.88	1.4	0.96	1.21	1.73	1.06	1.19									0.0527	0.0532	0.7969	0.781	0.8935	0.5628	0.3718	0.3218	0.6404	0.3957	0.5141	0.6066	0.0252	0.0428	0.9893	0.4244	0.275	0.4692	0.0019
	578			gamma-glutamylserine	LC/MS pos early	54914					1.32	0.88	0.77	1.07	0.99	0.69	0.58	0.84	1.16	0.78	0.8	1.12									0.0399	0.043	0.3407	0.5861	0.0578	0.1288	0.7772	0.5014	0.9824	0.4986	0.0108	0.0593	0.0003	0.0013	0.156	0.1407	0.2522	0.4569	0.0608
	579			gamma-glutamylcitrulline*	LC/MS pos early	62104					0.92	2.78	0.97	2.18	0.99	1	1.05	0.78	0.59	1.8	0.59	1.33									0.6008	0.3075	0.0002	0.0077	0.6271	0.4693	0.0056	0.0177	0.9231	0.4828	0.884	0.7335	0.8932	0.5021	0.2687	0.1991	0.0327	0.153	0.016
	580			gamma-glutamyl-2-aminobutyrate	LC/MS pos early	37092					2.09	2.92	1.24	1.12	1.16	1.3	0.69	0.5	0.59	0.83	0.77	0.6									0.0036	0.0073	0.0002	0.0087	0.3363	0.3303	0.9697	0.558	0.5403	0.3658	0.2963	0.4791	0.1312	0.1495	0.0048	0.0179	0.0428	0.1756	0.2704
	582		Dipeptide Derivative	isoleucylhydroxyproline*	LC/MS pos early	63051		HMDB28908			1.33	0.85	1.28	0.69	1.66	1.36	1.59	1.1	1.37	0.88	1.87	0.61									0.0231	0.0276	0.2692	0.5481	0.0308	0.0937	0.0028	0.012	0.0004	0.0031	0.0115	0.0619	0.0006	0.0022	0.5718	0.3112	0.021	0.1181	0.287
	583			leucylhydroxyproline*	LC/MS pos early	63052		HMDB28930	20847829		1.82	0.61	1.68	0.56	1.47	1.07	1.35	0.99	0.76	0.25	0.81	0.18									0.0224	0.0272	0.0748	0.2924	0.0582	0.1292	0.0037	0.014	0.1135	0.1437	0.6924	0.6663	0.2418	0.2299	0.3808	0.2393	0.3982	0.5379	1.4976e-05
	743		Dipeptide	glycylleucine	LC/MS pos early	34398	C02155	HMDB00759	92843		1.02	0.92	1.44	1.11	0.5	1.63	0.7	1.98	0.74	0.66	1.21	1.87									0.9258	0.401	0.7241	0.7599	0.2049	0.2451	0.5415	0.4003	0.009	0.0317	0.0308	0.1232	0.1738	0.1842	0.0028	0.0145	0.1843	0.3906	0.1152
	857			phenylalanylhydroxyproline*	LC/MS neg	63039		HMDB28996 HMDB11176			1.49	0.65	1.42	0.45	1.59	1.15	1.52	0.8	1.27	0.55	1.46	0.29									0.0808	0.073	0.0663	0.2768	0.1318	0.1982	0.0001	0.0013	0.0486	0.0893	0.4729	0.5923	0.0823	0.1088	0.0981	0.1083	0.3301	0.5028	0.0106
	870			prolylglycine	LC/MS pos early	40703		HMDB11178	6426709		1.39	0.82	2.78	0.96	0.6	0.82	1.21	0.96	0.63	0.37	0.52	0.3									0.3959	0.2363	0.3466	0.5909	0.0151	0.0619	0.9921	0.5636	0.1926	0.2014	0.4418	0.5733	0.7084	0.4444	0.8689	0.3929	0.2232	0.425	0.0045
	1056		Acetylated Peptides	phenylacetylcarnitine	LC/MS pos early	48425			101724840		1.45	2.64	1	4.38	0.38	0.47	0.26	0.78	0.8	1.46	0.38	4.38									0.8588	0.3862	0.0266	0.1631	1	0.5902	0.0531	0.0939	0.1138	0.1437	0.4263	0.5623	0.0805	0.1076	0.2698	0.1992	0.4184	0.546	0.1942
	1091	Carbohydrate	Glycolysis, Gluconeogenesis, and Pyruvate Metabolism	1,5-anhydroglucitol (1,5-AG)	LC/MS neg	20675	C07326	HMDB02712	64960		0.74	0.88	0.84	1	0.79	0.85	0.9	0.97	1.04	1.25	0.89	1.33									0.0658	0.0638	0.3756	0.6199	0.2695	0.2925	0.884	0.5333	0.1525	0.1714	0.3119	0.4869	0.4988	0.3594	0.7843	0.3714	0.608	0.6225	0.1372
	1094			glucose	LC/MS polar	48152	C00031	HMDB00122	5793		0.91	0.99	0.91	1.12	0.86	1.03	0.85	1.16	0.79	0.85	0.81	1.16									0.2497	0.1711	0.8761	0.7886	0.1811	0.2347	0.2224	0.2361	0.0606	0.101	0.7502	0.6938	0.0401	0.0638	0.0946	0.1055	0.0037	0.0398	0.0423
	1110			pyruvate	LC/MS polar	48990	C00022	HMDB00243	1060		1.07	1.26	1.27	0.76	1.08	1.29	1.28	0.78	0.9	1.06	1.17	0.65									0.5851	0.3016	0.2146	0.4821	0.241	0.2757	0.2473	0.2525	0.6826	0.411	0.1771	0.3534	0.299	0.2631	0.2949	0.211	0.6055	0.6225	0.8481
	1111			lactate	LC/MS polar	527	C00186	HMDB00190	612		1.07	1.18	1.04	1.03	1.24	1.03	1.2	0.9	1.69	1.85	1.73	1.39									0.4526	0.2578	0.225	0.4899	0.7809	0.5323	0.765	0.4965	0.0884	0.1277	0.8515	0.726	0.2105	0.2098	0.4606	0.2714	0.0002	0.0065	4.2261e-05
	1114			glycerate	LC/MS polar	1572	C00258	HMDB00139	752		1.05	0.96	0.85	0.97	0.82	0.67	0.66	0.68	0.86	0.79	0.58	0.81									0.4359	0.2518	0.6036	0.7276	0.0835	0.156	0.6848	0.4628	0.0568	0.0977	0.0002	0.0032	7.2644e-05	0.0005	0.0002	0.0025	0.1786	0.3799	0.0113
	1133		Pentose Metabolism	ribitol	LC/MS polar	15772	C00474	HMDB00508	6912		0.94	1.33	1.25	1.13	0.78	0.89	1.04	0.76	1.46	2.05	1.29	1.49									0.762	0.3568	0.0504	0.2413	0.1122	0.1785	0.3956	0.3355	0.1025	0.1358	0.5639	0.6187	0.7982	0.4717	0.0887	0.1015	0.0164	0.101	2.8885e-05
	1134			ribonate	LC/MS polar	27731	C01685	HMDB00867	5460677		0.92	0.9	1.02	0.99	1.01	1.05	1.11	1.16	1.15	1.13	1.22	1.18									0.9229	0.4008	0.4024	0.6413	0.8568	0.5535	0.9628	0.558	0.5318	0.363	0.6989	0.6679	0.3688	0.2982	0.2421	0.1846	0.0974	0.2914	0.3459
	1138			xylose	LC/MS polar	15581	C00181	HMDB00098	135191		0.97	1.16	1.33	1.06	1.17	1.26	1.6	1.16	0.94	1.12	1.19	0.81									0.9439	0.4065	0.4759	0.6829	0.1571	0.2149	0.669	0.4562	0.6389	0.3953	0.4257	0.5623	0.0548	0.0796	0.6087	0.3242	0.884	0.6977	0.5233
	1140			arabinose	LC/MS polar	575	C00216	HMDB00646	66308		0.96	0.7	0.67	0.76	1.07	0.78	0.75	0.84	1.21	0.89	0.94	1									0.6678	0.3293	0.1122	0.3612	0.1692	0.2235	0.1799	0.2113	0.7691	0.4393	0.2325	0.4197	0.2134	0.2117	0.3468	0.2291	0.4109	0.5446	0.7162
	1148			arabitol/xylitol	LC/MS polar	48885			6912;94154		0.6	0.98	1.62	0.91	0.68	1.24	1.81	1.15	1.07	1.75	1.32	1.11									0.0006	0.0019	0.9343	0.8033	0.0021	0.0182	0.4442	0.3602	0.0103	0.0341	0.1073	0.2575	0.0001	0.0007	0.3417	0.2281	0.553	0.6043	0.0001
	1154			arabonate/xylonate	LC/MS polar	48255			122045;6602431		0.72	0.78	0.74	0.91	0.91	0.87	0.94	1.01	1.27	1.37	1.1	1.48									0.0206	0.0257	0.061	0.2655	0.0594	0.1312	0.398	0.3369	0.3651	0.298	0.2914	0.4738	0.665	0.4259	0.9902	0.4244	0.084	0.2719	0.0296
	1157			sedoheptulose	LC/MS polar	53237		HMDB03219	5459879		1.36	0.9	0.75	1.04	1.31	0.73	0.72	0.86	1.85	1.22	1.36	1.45									0.0646	0.0628	0.5142	0.6854	0.07	0.142	0.7936	0.5111	0.0817	0.1223	0.0602	0.1811	0.055	0.0796	0.3131	0.219	0.0005	0.0137	0.1911
	1158			ribulonate/xylulonate/lyxonate*	LC/MS polar	61858					1.41	0.96	0.79	0.98	1.04	0.75	0.58	0.76	1.43	0.97	1.07	1.27									0.0107	0.0161	0.6475	0.7397	0.0815	0.1545	0.8257	0.5201	0.8068	0.4491	0.0266	0.1118	0.0002	0.0009	0.0451	0.0674	0.0091	0.0693	0.6931
	1167		Glycogen Metabolism	maltose	LC/MS polar	15586	C00208	HMDB00163	10991489		4.29	0.7	3.35	1.45	0.32	0.49	0.25	1.02	0.84	0.14	0.41	0.56									0.0007	0.0022	0.4057	0.6413	0.0032	0.0237	0.6413	0.4448	0.0033	0.0153	0.1691	0.3459	0.0008	0.0029	0.9257	0.4038	0.3532	0.5191	4.3443e-06
	1171		Disaccharides and Oligosaccharides	stachyose	LC/MS neg	15960	C01613	HMDB03553	439531		0.85	1.22	1.39	1.3	0.89	1.37	1.45	1.46	0.75	1.08	1.03	1.08									0.848	0.3829	0.7716	0.7736	0.1971	0.2416	0.5023	0.3874	0.8857	0.4724	0.304	0.4829	0.1076	0.1293	0.1622	0.1433	0.8367	0.6854	0.7827
	1193			sucrose	LC/MS polar	1519	C00089	HMDB00258	5988		5.87	2.5	8.58	4.22	0.52	0.97	0.75	1.64	0.76	0.33	0.74	0.71									4.2312e-05	0.0003	0.0343	0.1988	1.7086e-06	0.0001	0.0015	0.0077	0.1018	0.1358	0.7967	0.7146	0.5655	0.3892	0.1365	0.1312	0.3719	0.5319	0.0017
	1203			raffinose	LC/MS neg	586	C00492	HMDB03213	10542		0.89	1.12	1.22	1.22	0.95	1.22	1.3	1.33	0.77	0.97	0.94	0.99									0.849	0.3829	0.9769	0.81	0.3043	0.3142	0.7409	0.4906	0.9636	0.4938	0.4844	0.5938	0.2428	0.2299	0.3192	0.2209	0.6626	0.6398	0.8279
	1214		Fructose, Mannose and Galactose Metabolism	fructose	LC/MS polar	48195	C00095	HMDB00660	5984		0.51	1.14	0.76	1.8	0.79	0.86	1.18	1.36	0.69	1.54	0.59	1.77									0.0036	0.0074	0.5974	0.726	0.0984	0.1686	0.0255	0.0546	0.3776	0.3043	0.5426	0.6147	0.5923	0.3983	0.2412	0.1844	0.1655	0.3709	0.0313
	1219			mannitol/sorbitol	LC/MS polar	46142	C00794	HMDB00247	5780		0.35	3.21	0.79	1.56	0.66	1.63	1.51	0.79	0.45	4.13	0.73	2.18									0.0078	0.013	0.0037	0.0523	0.9664	0.5819	0.3343	0.3042	0.0466	0.0864	0.1675	0.3459	0.4721	0.3516	0.4681	0.2738	0.0469	0.1811	0.0005
	1220			mannose	LC/MS polar	48153	C00159	HMDB00169	18950		1.02	0.92	0.79	1.18	1.26	1.25	0.97	1.6	0.8	0.72	1	1.2									0.8185	0.3751	0.4902	0.6829	0.0915	0.1643	0.2884	0.2778	0.1024	0.1358	0.1053	0.2559	0.7737	0.4638	0.0016	0.0104	0.106	0.3067	0.0142
	1240			galactonate	LC/MS polar	27719	C00880	HMDB00565	128869		0.37	1.49	0.99	1.13	0.47	1.06	1.25	0.81	0.62	2.49	0.66	1.61									0.0001	0.0006	0.0672	0.2768	0.8805	0.5597	0.6203	0.4344	0.002	0.0102	0.6733	0.6586	0.3892	0.3096	0.3398	0.2281	0.06	0.2131	0.0001
	1271		Aminosugar Metabolism	glucuronate	LC/MS polar	15443	C00191	HMDB00127	444791		0.93	0.95	0.99	0.92	1.35	1.31	1.43	1.27	0.96	0.98	1.26	0.87									0.4403	0.2529	0.5732	0.7131	0.8039	0.5388	0.4607	0.3684	0.0019	0.0102	0.007	0.0425	0.0005	0.0019	0.0109	0.0301	0.6509	0.639	0.8083
	1283			N-acetylneuraminate	LC/MS polar	32377	C00270	HMDB00230	439197		1.16	1.06	1	1.47	1.38	1.41	1.18	1.95	1.23	1.13	1.74	1.86									0.3162	0.2025	0.6722	0.7442	0.9921	0.5902	0.0085	0.0238	0.0207	0.0546	0.0117	0.0619	0.1639	0.1776	1.7126e-05	0.0005	0.126	0.3337	0.3344
	1294			N-acetylglucosaminylasparagine	LC/MS pos early	48149	C04540	HMDB00489	123826		1.3	0.96	1.32	0.88	1.59	1.47	1.62	1.34	1.06	0.78	1.55	0.65									0.0237	0.0283	0.6341	0.7373	0.0316	0.0954	0.3664	0.32	0.0003	0.0022	0.005	0.0343	0.0004	0.0017	0.0147	0.0335	0.5594	0.6045	0.0304
	1295			erythronate*	LC/MS polar	42420		HMDB00613	2781043		0.8	0.95	0.99	1.03	1.22	1.35	1.5	1.48	1.01	1.19	1.37	1.18									0.0111	0.0163	0.5052	0.6854	0.8899	0.5621	0.7033	0.4716	0.0215	0.0552	0.0009	0.0099	2.131e-05	0.0002	4.2413e-05	0.0008	0.8584	0.6909	0.0349
	1297			N-acetylglucosamine/N-acetylgalactosamine	LC/MS pos early	46539		HMDB00215	24139		1.76	0.87	1.03	0.77	2.74	1.42	1.61	1.25	1.82	0.91	2.59	0.71									0.0053	0.01	0.4064	0.6413	0.9461	0.5769	0.1447	0.1839	6.3846e-06	0.0002	0.0417	0.1551	0.019	0.0354	0.1519	0.1389	0.0023	0.0278	0.61
	1298			N-glycolylneuraminate	LC/MS polar	37123	C03410	HMDB00833	123802		1.66	1.74	0.73	0.95	1.6	1.3	0.7	0.72	0.87	0.91	1.14	0.93									0.2007	0.1459	0.0831	0.2966	0.5014	0.4144	0.7172	0.4772	0.3013	0.2666	0.3291	0.499	0.3563	0.2929	0.2533	0.1909	0.5995	0.622	0.9619
	1299		Advanced Glycation End-product	N6-carboxymethyllysine	LC/MS pos early	36713			123800		0.47	0.96	0.87	1.01	1.05	1.15	1.95	1.21	1	2.04	1.15	1.26									6.8776e-06	6.5204e-05	0.7531	0.7693	0.3347	0.3303	0.9814	0.5609	0.6919	0.412	0.2965	0.4791	3.7089e-05	0.0003	0.1849	0.1562	0.9266	0.7187	1.322e-05
	1303	Energy	TCA Cycle	citrate	LC/MS neg	1564	C00158	HMDB00094	311		0.89	0.84	1.02	0.95	1.04	0.94	1.2	1.06	1.11	1.04	1.04	0.92									0.2692	0.1808	0.1867	0.4548	0.7411	0.5172	0.6283	0.4393	0.841	0.4616	0.7391	0.6886	0.1067	0.1286	0.6035	0.3229	0.5323	0.5926	0.6872
	1305			aconitate [cis or trans]	LC/MS neg	46173					0.86	0.71	0.98	0.92	1.07	0.92	1.22	1.19	1.18	0.97	1.08	0.95									0.1703	0.1298	0.0076	0.0774	0.8614	0.5556	0.3297	0.3017	0.5748	0.3759	0.6322	0.6424	0.0823	0.1088	0.1777	0.153	0.2204	0.4243	0.8439
	1307			isocitrate	LC/MS pos early	12110	C00311	HMDB00193	1198		1.41	0.68	0.96	0.98	1.53	0.8	1.04	1.16	1.68	0.8	1.34	0.9									0.1408	0.1116	0.0494	0.2413	0.7255	0.5119	0.81	0.5148	0.0333	0.0717	0.3173	0.4915	0.7214	0.446	0.4387	0.2647	0.0117	0.0798	0.3866
	1308			isocitric lactone	LC/MS polar	54724			98259		0.73	0.81	1.48	0.81	1.07	1.35	2.16	1.34	1.17	1.31	1.58	0.81									0.0791	0.0719	0.2065	0.4697	0.0272	0.0879	0.1935	0.2215	0.8561	0.4625	0.086	0.2233	0.0001	0.0008	0.0928	0.1047	0.4398	0.5541	0.2007
	1309			alpha-ketoglutarate	LC/MS polar	528	C00026	HMDB00208	51		1.22	1.03	1.43	1.4	1.06	0.83	1.25	1.13	0.74	0.62	0.62	0.57									0.3938	0.236	0.8286	0.7873	0.0326	0.0971	0.0607	0.1004	0.6898	0.412	0.2786	0.4619	0.0859	0.1112	0.5372	0.3015	0.0927	0.2847	0.0235
	1311			succinylcarnitine (C4-DC)	LC/MS pos early	37058		HMDB61717	71464481		1.03	1.09	0.89	1	0.96	0.91	0.83	0.84	0.9	0.95	0.82	0.97									0.8838	0.3923	0.4721	0.6829	0.4099	0.3695	0.9655	0.558	0.9774	0.4986	0.6434	0.6453	0.479	0.3521	0.2245	0.1741	0.5551	0.6045	0.7824
	1312			succinate	LC/MS polar	1437	C00042	HMDB00254	1110		1.1	0.7	0.99	0.83	1.07	1.02	0.96	1.21	1.8	1.15	1.83	1.44									0.6842	0.3316	0.0543	0.2521	0.73	0.5141	0.2613	0.2593	0.6915	0.412	0.6797	0.6595	0.7225	0.446	0.2128	0.17	0.0022	0.0278	0.3664
	1313			fumarate	LC/MS polar	1643	C00122	HMDB00134	444972		1.12	0.76	1.12	0.84	1.07	0.98	1.07	1.09	1.96	1.32	1.92	1.34									0.3181	0.2025	0.0661	0.2768	0.428	0.3787	0.2503	0.2531	0.5933	0.3823	0.8671	0.7327	0.745	0.4531	0.5774	0.3126	2.9458e-05	0.0021	0.0603
	1315			malate	LC/MS neg	1303	C00149	HMDB00156	525		1.14	0.74	1.21	0.83	1.14	0.93	1.22	1.04	2.04	1.33	1.9	1.14									0.4529	0.2578	0.0482	0.2413	0.2008	0.2422	0.204	0.2256	0.3288	0.2805	0.6315	0.6424	0.1339	0.1518	0.7863	0.3718	1.4498e-05	0.0016	0.0285
	1319			itaconate	LC/MS polar	18373	C00490	HMDB02092	811		4.62	1.86	2.32	1.88	2.78	1.84	1.4	1.85	1.41	0.57	2.6	0.76									0.0008	0.0024	0.0227	0.1468	0.0488	0.1183	0.0565	0.0978	0.0183	0.0509	0.0779	0.2121	0.3995	0.3159	0.1692	0.1472	0.9815	0.7233	0.199
	1320			tricarballylate	LC/MS polar	15729	C19806	HMDB31193	14925		2.2	5.52	1.48	2.44	0.89	2.25	0.59	1	0.82	2.05	1.84	3.44									0.1035	0.0891	0.0088	0.0832	0.9443	0.5769	0.2727	0.2652	0.7355	0.4292	0.1912	0.3686	0.0449	0.0706	0.7361	0.3576	0.8081	0.6837	0.3906
	1325			2-methylcitrate/homocitrate	LC/MS neg	52282			515;439459		0.91	0.96	1.29	1.75	0.6	0.63	0.85	1.15	1.13	1.2	0.71	1.61									0.5053	0.2737	0.9421	0.8033	0.2263	0.2656	0.0103	0.0275	0.0145	0.0428	0.0462	0.1632	0.5023	0.3613	0.5671	0.3102	0.7872	0.6805	0.3158
	1330		Oxidative Phosphorylation	phosphate	LC/MS pos early	42109	C00009	HMDB01429	1061		1.39	0.66	1.1	0.88	0.93	0.51	0.73	0.68	2.02	0.96	1.04	0.89									0.1556	0.1209	0.0934	0.3181	0.9444	0.5769	0.6016	0.4262	0.9158	0.4822	0.0068	0.0422	0.1126	0.1345	0.1002	0.1095	0.0028	0.033	0.9605
	1332	Lipid	Fatty Acid Synthesis	malonylcarnitine	LC/MS pos early	37059		HMDB02095	22833583		0.86	0.82	0.91	1.03	0.77	0.89	0.82	1.11	0.98	0.94	0.87	1.28									0.2457	0.1701	0.3868	0.6266	0.6303	0.4709	0.9134	0.5447	0.1809	0.1941	0.5345	0.6145	0.5068	0.3639	0.7219	0.3539	0.8115	0.6837	0.9489
	1333			malonate	LC/MS polar	15872	C00383	HMDB00691	867		0.94	1.45	0.9	1.3	1.1	1.14	1.05	1.02	0.68	1.04	0.77	1.01									0.7754	0.361	0.0341	0.1988	0.6688	0.4858	0.044	0.0844	0.6991	0.4143	0.7859	0.7118	0.8073	0.4757	0.8764	0.3932	0.0252	0.1322	0.8789
	1346		Short Chain Fatty Acid	butyrate (4:0)	LC/MS neg	40605	C00246	HMDB00039	264		0.94	0.3	1.23	1.04	1.07	0.33	1.4	1.14	2.14	0.69	0.71	0.56									0.756	0.3547	7.304e-05	0.0037	0.3728	0.3484	0.8491	0.5284	0.7991	0.4483	0.0003	0.0052	0.1503	0.166	0.471	0.2749	0.0168	0.101	0.0961
	1347			valerate (5:0)	LC/MS neg	33443	C00803	HMDB00892	7991		1.16	0.12	1.44	0.79	1.15	0.22	1.42	1.42	2.83	0.3	0.63	0.3									0.4437	0.2544	2.3147e-08	1.421e-05	0.1857	0.2348	0.3443	0.3086	0.428	0.3274	2.1378e-05	0.0008	0.1772	0.186	0.1658	0.145	0.0014	0.0244	5.7899e-05
	1348		Medium Chain Fatty Acid	caproate (6:0)	LC/MS neg	32489	C01585	HMDB00535	8892		0.86	0.83	1.9	0.4	0.57	1.26	1.26	0.6	1.21	1.18	1.52	0.56									0.4663	0.2616	0.5718	0.7131	0.1143	0.1805	0.0059	0.0185	0.0356	0.0741	0.5648	0.6187	0.8686	0.4936	0.0818	0.0959	0.6135	0.6225	0.5039
	1349			heptanoate (7:0)	LC/MS neg	1644	C17714	HMDB00666	8094		1.73	1.11	1.37	0.71	0.75	1.19	0.59	0.76	0.82	0.53	0.97	0.67									0.0211	0.0262	0.6275	0.7338	0.1182	0.1846	0.0765	0.116	0.2513	0.2361	0.4424	0.5733	0.0554	0.0798	0.1328	0.1292	0.466	0.5603	0.0117
	1350			caprylate (8:0)	LC/MS neg	32492	C06423	HMDB00482	379		1.38	0.98	1.18	0.69	0.72	0.98	0.62	0.69	1	0.71	0.98	0.79									0.1654	0.1267	0.8539	0.7873	0.4429	0.387	0.1759	0.2086	0.1748	0.1902	0.6594	0.6545	0.0507	0.077	0.1101	0.1159	0.9363	0.7194	0.1372
	1351			pelargonate (9:0)	LC/MS neg	12035	C01601	HMDB00847	8158		1.81	1.07	1.31	0.69	0.66	0.89	0.48	0.58	1.14	0.67	1.01	0.81									0.0143	0.0198	0.9946	0.8125	0.3478	0.3355	0.1612	0.1966	0.3245	0.2793	0.548	0.6187	0.0128	0.0255	0.0502	0.072	0.3825	0.5344	0.0966
	1352			caprate (10:0)	LC/MS neg	1642	C01571	HMDB00511	2969		1.57	1.08	1.4	0.8	0.6	0.95	0.53	0.7	1.16	0.8	1.11	1.05									0.0418	0.0446	0.7427	0.7688	0.0807	0.1544	0.2347	0.2467	0.0159	0.0457	0.6819	0.6595	0.0074	0.0166	0.0592	0.0802	0.3815	0.5344	0.3739
	1353			cis-4-decenoate (10:1n6)*	LC/MS neg	62873			5312351		0.51	0.63	1.33	0.59	0.3	0.81	0.76	0.76	1.38	1.69	1.12	1.69									0.0431	0.0457	0.2288	0.4945	0.0786	0.1516	0.2919	0.2803	0.0001	0.0013	0.2645	0.4465	0.6845	0.4349	0.3343	0.227	0.3696	0.5319	0.083
	1357			laurate (12:0)	LC/MS neg	1645	C02679	HMDB00638	3893		1.13	1.02	1.15	1.02	0.84	1.06	0.85	1.05	1.24	1.12	1.32	1.39									0.4981	0.2723	0.9084	0.799	0.3502	0.3364	0.7496	0.4927	0.2426	0.2351	0.803	0.7158	0.3605	0.2929	0.8534	0.3904	0.1457	0.3588	0.3634
	1358			5-dodecenoate (12:1n7)	LC/MS neg	33968		HMDB00529	5312378		0.94	0.66	1.33	0.62	0.72	0.94	1.02	0.89	1.54	1.09	1.45	0.94									0.5698	0.2986	0.1725	0.4346	0.1492	0.2116	0.1345	0.1752	0.0566	0.0977	0.8365	0.7183	0.9414	0.5192	0.7301	0.3563	0.16	0.3691	0.5413
	1361		Long Chain Saturated Fatty Acid	myristate (14:0)	LC/MS neg	1365	C06424	HMDB00806	11005		0.86	1.02	1.31	0.56	0.81	1.01	1.24	0.55	1.68	2	1.7	0.89									0.3997	0.2377	0.8195	0.7873	0.1212	0.1864	0.0061	0.0187	0.2455	0.2354	0.9663	0.7497	0.2158	0.213	0.0037	0.0174	0.0124	0.0809	0.0007
	1362			pentadecanoate (15:0)	LC/MS neg	1361	C16537	HMDB00826	13849		0.95	0.93	1.08	0.84	0.93	0.93	1.06	0.84	1.24	1.21	1.16	0.96									0.3889	0.2344	0.1932	0.4622	0.1884	0.2349	0.0069	0.02	0.2479	0.2361	0.217	0.4033	0.3059	0.2656	0.0082	0.0256	0.001	0.0227	0.0032
	1363			palmitate (16:0)	LC/MS neg	1336	C00249	HMDB00220	985		0.8	0.97	1.44	0.53	0.78	1.05	1.41	0.57	1.58	1.92	1.66	0.78									0.2156	0.1543	0.8883	0.7938	0.0544	0.1251	0.004	0.0143	0.1384	0.161	0.906	0.7363	0.0914	0.1158	0.0077	0.0245	0.0337	0.1557	0.0021
	1364			margarate (17:0)	LC/MS neg	1121		HMDB02259	10465		0.91	0.74	1.29	0.59	0.83	0.78	1.18	0.62	1.54	1.26	1.2	0.66									0.4574	0.2599	0.06	0.2643	0.075	0.1473	0.0032	0.0126	0.1753	0.1902	0.0981	0.2427	0.2365	0.2267	0.0061	0.0212	0.0081	0.0633	0.1138
	1365			stearate (18:0)	LC/MS neg	1358	C01530	HMDB00827	5281		0.79	0.88	1.28	0.69	0.88	1.02	1.41	0.8	1.22	1.36	1.25	0.78									0.1162	0.0954	0.4084	0.6428	0.0665	0.1378	0.0216	0.0482	0.2594	0.239	0.9359	0.7453	0.0242	0.0415	0.1441	0.1358	0.1553	0.3661	0.0327
	1366			nonadecanoate (19:0)	LC/MS neg	1356	C16535	HMDB00772	12591		0.77	0.8	1.36	0.54	0.75	0.79	1.32	0.54	1.54	1.59	1.22	0.65									0.1138	0.0943	0.1077	0.3497	0.0491	0.1185	0.001	0.0059	0.0661	0.1069	0.1233	0.2811	0.0866	0.1114	0.0012	0.0082	0.0096	0.0708	0.0103
	1367			arachidate (20:0)	LC/MS neg	1118	C06425	HMDB02212	10467		0.77	0.9	1.32	0.5	0.77	0.92	1.32	0.51	1.66	1.93	1.52	0.75									0.1754	0.1324	0.4483	0.6665	0.1518	0.213	0.0028	0.012	0.1544	0.172	0.5676	0.6187	0.1724	0.1834	0.0047	0.0176	0.0241	0.1293	0.0054
	1369			behenate (22:0)*	LC/MS neg	12125	C08281	HMDB00944	8215		0.49	0.64	1.35	0.32	0.6	0.85	1.65	0.42	1.89	2.48	1.6	0.63									0.001	0.0027	0.0269	0.1633	0.1569	0.2149	5.489e-06	0.0002	0.0202	0.0539	0.3687	0.5262	0.0129	0.0256	0.0003	0.0029	0.0072	0.0599	0.0002
	1374		Long Chain Monounsaturated Fatty Acid	myristoleate (14:1n5)	LC/MS neg	32418	C08322	HMDB02000	5281119		1.1	1.19	2.31	0.24	0.83	1.63	1.73	0.33	1.71	1.84	2.78	0.35									0.8419	0.3813	0.7255	0.7601	0.0077	0.0441	0.0008	0.0049	0.2522	0.2361	0.1734	0.3497	0.1498	0.166	0.0117	0.0309	0.2537	0.4569	0.1977
	1377			palmitoleate (16:1n7)	LC/MS neg	33447	C08362	HMDB03229	445638		0.89	1.35	2.63	0.27	0.86	1.72	2.56	0.34	1.78	2.7	3.06	0.36									0.921	0.4008	0.3017	0.5647	0.0116	0.0537	0.0015	0.0079	0.5776	0.3765	0.0694	0.1983	0.0341	0.0559	0.0129	0.0321	0.3254	0.5028	0.0393
	1379			10-heptadecenoate (17:1n7)	LC/MS neg	33971		HMDB60038	5312435		0.85	0.75	1.73	0.33	0.89	0.96	1.82	0.43	2.27	1.99	2.19	0.47									0.4647	0.2616	0.3169	0.5776	0.0234	0.0812	0.0003	0.0022	0.4924	0.349	0.9781	0.7538	0.0211	0.0378	0.0043	0.0176	0.0067	0.057	0.0132
	1381			oleate/vaccenate (18:1)	LC/MS neg	52285			445639;5282761;5281127		0.75	0.81	1.86	0.29	0.85	1.22	2.11	0.44	2.11	2.31	2.58	0.48									0.2289	0.1606	0.3969	0.6388	0.0201	0.0758	0.0001	0.0013	0.4	0.3136	0.4813	0.5938	0.0082	0.0181	0.0095	0.0273	0.0186	0.1073	0.0076
	1387			10-nonadecenoate (19:1n9)	LC/MS neg	33972		HMDB13622	5312513		0.74	0.82	1.57	0.33	0.86	1.07	1.82	0.44	1.99	2.2	2.13	0.53									0.1653	0.1267	0.2959	0.5647	0.0488	0.1183	7.1529e-05	0.0008	0.4232	0.3256	0.863	0.7308	0.0122	0.0245	0.0022	0.0126	0.0079	0.0631	0.0031
	1390			eicosenoate (20:1)	LC/MS neg	33587	C16526	HMDB02231	5282768		0.68	0.82	1.77	0.27	0.92	1.38	2.4	0.45	1.92	2.32	2.64	0.44									0.0789	0.0719	0.3285	0.5801	0.0146	0.0613	5.9841e-06	0.0002	0.5477	0.3684	0.1832	0.3609	0.0006	0.0024	0.0045	0.0176	0.0169	0.101	0.0021
	1394			erucate (22:1n9)	LC/MS neg	1552	C08316	HMDB02068	5281116		0.74	0.87	1.92	0.36	0.82	1.51	2.14	0.61	1.23	1.46	1.86	0.42									0.1058	0.0902	0.5706	0.7131	0.0012	0.0119	1.0801e-05	0.0003	0.1762	0.1906	0.0267	0.1118	0.0006	0.0022	0.0272	0.0497	0.4696	0.5619	0.0776
	1396			nervonate (24:1n9)*	LC/MS neg	52674	C08323	HMDB02368	5281120		0.75	0.94	1.32	0.67	0.93	1.67	1.65	1.2	1.06	1.34	1.77	0.97									0.1841	0.1367	0.9547	0.804	0.0948	0.1668	0.0188	0.0438	0.8901	0.4741	0.0022	0.0197	0.0061	0.0143	0.3708	0.2363	0.6397	0.6325	0.0857
	1397		Long Chain Polyunsaturated Fatty Acid (n3 and n6)	tetradecadienoate (14:2)*	LC/MS neg	62850		HMDB00560	5312409		1.18	0.65	1.34	0.53	1.52	0.97	1.72	0.79	1.52	0.83	1.47	0.38									0.8363	0.3804	0.1671	0.4288	0.0213	0.0767	0.0492	0.0904	0.8497	0.4625	0.8975	0.7355	0.0516	0.0778	0.4524	0.2671	0.1579	0.3661	0.8614
	1398			hexadecatrienoate (16:3n3)	LC/MS neg	57651			5312428		0.74	0.61	2.93	0.4	0.72	0.98	2.83	0.65	2.64	2.18	2.59	0.5									0.4206	0.246	0.2742	0.5501	0.0009	0.0097	0.0155	0.0387	0.3469	0.2868	0.9489	0.7484	0.0012	0.0042	0.1773	0.153	0.0049	0.0478	0.0103
	1404			stearidonate (18:4n3)	LC/MS neg	33969	C16300	HMDB06547	5312508		1.6	1.15	4.29	0.42	2.39	1.71	6.42	0.62	1.76	1.27	3	0.12									0.6432	0.3221	0.7184	0.7578	0.0001	0.0026	0.0303	0.0626	0.4239	0.3256	0.1514	0.3238	4.4424e-05	0.0003	0.2541	0.191	0.2133	0.4151	0.2523
	1407			eicosapentaenoate (EPA; 20:5n3)	LC/MS neg	18467	C06428	HMDB01999	446284		0.58	0.93	2.12	0.6	1.18	1.51	4.29	0.98	1.53	2.43	2.32	0.56									0.0074	0.0127	0.778	0.7749	0.0005	0.0073	0.0094	0.0253	0.6061	0.3867	0.0444	0.1577	2.7674e-08	1.223e-06	0.7014	0.3488	0.0455	0.1811	5.3795e-05
	1409			docosapentaenoate (n3 DPA; 22:5n3)	LC/MS neg	32504	C16513	HMDB06528	6441454		0.56	0.57	1.97	0.49	0.99	1.02	3.46	0.87	1.73	1.76	1.77	0.44									0.0068	0.012	0.0146	0.1046	0.0007	0.0082	0.001	0.0058	0.5862	0.3795	0.7909	0.7127	7.9641e-07	1.8634e-05	0.4397	0.2647	0.0123	0.0809	0.0057
	1410			docosahexaenoate (DHA; 22:6n3)	LC/MS neg	44675	C06429	HMDB02183	445580		0.45	0.49	0.99	0.7	0.67	0.39	1.48	0.55	1.68	1.83	0.65	0.68									0.0026	0.0058	0.0037	0.0522	0.9257	0.5745	0.1042	0.1464	0.103	0.1359	0.0002	0.0039	0.1036	0.1268	0.011	0.0301	0.0134	0.0863	0.0099
	1411			docosatrienoate (22:3n3)	LC/MS neg	32417	C16534	HMDB02823	5312556		0.49	0.97	2.09	0.3	0.95	2.09	4.05	0.64	1.22	2.41	2.56	0.38									0.0013	0.0034	0.9023	0.7986	0.0007	0.0082	3.7498e-06	0.0001	0.7607	0.4374	0.0018	0.0174	6.9145e-08	2.5002e-06	0.0484	0.0703	0.3725	0.5319	0.0001
	1412			nisinate (24:6n3)	LC/MS neg	57810		HMDB02007	11792612		0.34	0.9	2.34	0.2	0.73	1.5	5.07	0.33	1.33	3.56	2	0.23									2.8771e-06	3.6486e-05	0.6101	0.7276	9.6682e-05	0.0023	1.1763e-09	5.0085e-07	0.1266	0.1527	0.0369	0.1417	9.0739e-10	1.203e-07	2.1954e-06	0.0001	0.1298	0.3359	1.439e-07
	1413			hexadecadienoate (16:2n6)	LC/MS neg	57652		HMDB00477	13932172		0.87	0.58	2.54	0.36	0.64	0.9	1.89	0.55	2.71	1.82	2.43	0.53									0.5392	0.2883	0.1188	0.3721	0.001	0.0105	0.004	0.0143	0.0757	0.1169	0.7082	0.6723	0.0218	0.0386	0.0696	0.0876	0.0037	0.0398	0.0389
	1414			linoleate (18:2n6)	LC/MS neg	1105	C01595	HMDB00673	5280450		0.59	0.7	1.89	0.35	0.55	0.89	1.76	0.44	2.76	3.31	2.45	0.83									0.0446	0.0467	0.1846	0.4533	0.0178	0.0704	0.0018	0.0089	0.0289	0.0659	0.4773	0.5938	0.028	0.0469	0.0093	0.0272	0.0012	0.0236	0.0002
	1416			linolenate [alpha or gamma; (18:3n3 or 6)]	LC/MS neg	34035	C06426	HMDB03073	5280934		0.59	0.69	2.5	0.36	0.58	0.95	2.47	0.5	3.33	3.88	3.18	0.79									0.1205	0.0977	0.3126	0.5762	0.0056	0.0344	0.016	0.039	0.1175	0.1463	0.6913	0.6663	0.0058	0.0143	0.0641	0.0824	0.0012	0.0236	0.0003
	1417			dihomo-linoleate (20:2n6)	LC/MS neg	17805	C16525	HMDB05060	6439848		0.61	0.71	1.2	0.55	0.79	1.01	1.55	0.78	1.19	1.38	1.2	0.7									0.0005	0.0018	0.0114	0.0908	0.1846	0.2348	4.0948e-05	0.0006	0.0791	0.1193	0.953	0.7484	0.0019	0.0058	0.0533	0.075	0.1496	0.362	0.0129
	1419			dihomo-linolenate (20:3n3 or n6)	LC/MS neg	35718	C03242	HMDB02925	5280581		0.45	0.89	1.65	0.37	0.85	1.54	3.09	0.63	1.4	2.76	2.15	0.57									3.5982e-05	0.0002	0.5652	0.7125	0.0046	0.0308	6.8751e-07	3.6593e-05	0.2949	0.2634	0.0137	0.0684	1.1583e-07	3.5441e-06	0.0056	0.02	0.0574	0.2079	6.3529e-07
	1420			arachidonate (20:4n6)	LC/MS neg	1110	C00219	HMDB01043	444899		0.35	0.59	1.09	0.59	0.58	0.91	1.82	0.91	1.15	1.96	1.05	0.98									8.1836e-07	1.5491e-05	0.0047	0.0605	0.5467	0.434	0.0038	0.0141	0.0012	0.0069	0.5591	0.6187	0.0035	0.0095	0.5058	0.289	0.386	0.5346	0.0004
	1422			adrenate (22:4n6)	LC/MS neg	32980	C16527	HMDB02226	5497181		0.53	0.65	1.83	0.42	0.65	1.02	2.24	0.66	1.36	1.67	1.39	0.49									0.0078	0.013	0.0742	0.2921	0.0084	0.0457	0.0003	0.0022	0.0281	0.0652	0.925	0.7452	0.0021	0.0063	0.0391	0.0631	0.1668	0.3709	0.022
	1423			docosapentaenoate (n6 DPA; 22:5n6)	LC/MS neg	37478	C16513	HMDB01976	6441454		0.37	0.79	1.48	0.38	0.66	0.97	2.66	0.47	1.17	2.52	1.14	0.44									0.0002	0.0007	0.2804	0.5535	0.1317	0.1982	4.8189e-05	0.0006	0.121	0.1478	0.929	0.7453	0.0002	0.0009	0.0008	0.0063	0.2945	0.4781	0.0002
	1424			docosadienoate (22:2n6)	LC/MS neg	32415	C16533	HMDB61714	5282807		0.71	0.92	1.87	0.51	0.89	1.32	2.36	0.73	1.3	1.69	1.71	0.52									0.0414	0.0443	0.6901	0.7495	0.0005	0.0073	0.0002	0.0017	0.3675	0.2993	0.0941	0.2341	1.5261e-05	0.0001	0.0461	0.0685	0.1166	0.3234	0.0022
	1482		Fatty Acid, Branched	(14 or 15)-methylpalmitate (a17:0 or i17:0)	LC/MS neg	38768			17903417		1.01	1.17	1.34	0.98	0.9	1.02	1.19	0.86	1.23	1.42	1.26	1.03									0.9971	0.4212	0.1353	0.3974	0.0037	0.0259	0.7725	0.4991	0.2519	0.2361	0.786	0.7118	0.0582	0.0833	0.131	0.1286	0.0378	0.1625	0.0008
	1486			(16 or 17)-methylstearate (a19:0 or i19:0)	LC/MS neg	38296		HMDB37397	3083779		0.93	1.19	1.7	0.89	0.85	1.15	1.56	0.86	1.16	1.49	1.33	0.82									0.4945	0.2712	0.4005	0.641	0.0018	0.0168	0.4514	0.3641	0.178	0.1921	0.5014	0.5958	0.0106	0.0222	0.3571	0.233	0.4264	0.549	0.0252
	1501		Fatty Acid, Dicarboxylate	dimethylmalonic acid	LC/MS polar	42978		HMDB02001	11686		0.75	0.95	1.18	0.94	1.15	1.44	1.8	1.42	1.4	1.78	2.02	1.4									0.1511	0.1177	0.9505	0.804	0.3232	0.3275	0.5515	0.4042	0.5372	0.3646	0.0245	0.107	0.004	0.0106	0.0994	0.1089	0.1489	0.3618	0.005
	1503			glutarate (C5-DC)	LC/MS polar	396	C00489	HMDB00661	743		1.08	1.16	1.06	1.3	0.84	0.59	0.82	0.66	1.84	1.97	1.08	1.58									0.8658	0.3871	0.8674	0.7879	0.8494	0.5495	0.3579	0.3167	0.5758	0.3759	0.0749	0.2089	0.59	0.3978	0.4648	0.2723	0.0257	0.1322	0.054
	1506			3-methylglutarate/2-methylglutarate	LC/MS polar	54676		HMDB00752			0.86	0.75	1.46	1.41	0.57	0.86	0.97	1.62	1.12	0.97	0.96	1.61									0.6103	0.3107	0.1648	0.4269	0.2002	0.2422	0.1211	0.1616	0.0521	0.0926	0.4985	0.5958	0.8469	0.4875	0.0263	0.0489	0.3874	0.5346	0.9758
	1507			2-hydroxyglutarate	LC/MS pos early	37253	C02630	HMDB0059655	43		0.85	0.92	1.09	1.16	1.01	0.91	1.29	1.15	1.21	1.31	1.1	1.18									0.1127	0.094	0.3561	0.599	0.5152	0.4203	0.2037	0.2256	0.9281	0.4834	0.4321	0.5649	0.0234	0.0409	0.16	0.1423	0.0939	0.2865	0.0213
	1509			adipate (C6-DC)	LC/MS polar	21134	C06104	HMDB00448	196		0.69	1.1	3.34	0.99	0.88	1.06	4.31	0.95	1.08	1.72	1.14	0.38									0.219	0.1558	0.772	0.7736	0.0027	0.0217	0.7681	0.4978	0.6361	0.3943	0.8374	0.7183	0.0003	0.0015	0.7045	0.3488	0.7469	0.6717	0.0704
	1511			2-hydroxyadipate	LC/MS polar	31934	C02360	HMDB00321	193530		0.73	1.75	1.14	1.2	0.61	0.17	0.95	0.12	4.35	10.4	0.75	1.28									0.5678	0.2986	0.8399	0.7873	0.7805	0.5323	0.6397	0.4443	0.4208	0.3254	0.0414	0.1549	0.9662	0.5247	0.0727	0.0902	0.1087	0.3106	0.0208
	1512			3-hydroxyadipate*	LC/MS polar	62069		HMDB00345	151913		0.71	0.96	1.48	1.65	0.95	0.84	1.98	1.45	1.41	1.91	1.18	1.39									0.1773	0.1335	0.9117	0.7996	0.1224	0.1874	0.0556	0.0966	0.6884	0.412	0.5553	0.6187	0.0153	0.0295	0.2101	0.1683	0.2942	0.4781	0.0155
	1515			maleate	LC/MS polar	20676	C01384	HMDB00176	444266		1.45	1.48	1.57	1.35	0.9	1.07	0.97	0.98	0.95	0.97	1.03	0.98									0.066	0.0638	0.042	0.2244	0.0148	0.0613	0.2115	0.228	0.5683	0.3738	0.6623	0.655	0.9234	0.5135	0.6895	0.347	0.8383	0.6854	0.9924
	1517			pimelate (C7-DC)	LC/MS polar	15704	C02656	HMDB00857	385		0.48	0.9	1.31	1.03	0.6	0.46	1.64	0.52	2.05	3.86	0.94	1.23									0.0203	0.0256	0.8669	0.7879	0.3281	0.3303	0.8546	0.5304	0.1005	0.1349	0.0238	0.1057	0.0909	0.1155	0.0247	0.0472	0.0514	0.1954	5.7364e-05
	1520			suberate (C8-DC)	LC/MS polar	15730	C08278	HMDB00893	10457		1.16	1.13	3.1	1.18	1.36	0.66	3.65	0.69	1.66	1.61	1.09	0.3									0.7317	0.3452	0.6224	0.7306	0.0053	0.0336	0.663	0.4551	0.4499	0.3357	0.2691	0.4501	0.0018	0.0055	0.2459	0.1862	0.138	0.3431	0.1042
	1523			azelaic acid	LC/MS neg	18362	C08261	HMDB00784	2266		1.42	1.49	0.93	1.13	1.15	0.39	0.76	0.3	3.2	3.35	1.25	1.33									0.2207	0.1565	0.0897	0.3111	0.6979	0.498	0.5497	0.4036	0.6143	0.3872	0.0004	0.0054	0.2662	0.2434	1.3518e-05	0.0004	4.259e-05	0.0026	9.9348e-06
	1525			sebacate (C10-DC)	LC/MS neg	32398	C08277	HMDB00792	5192		0.98	1.16	3.45	1.05	1.47	0.83	5.18	0.74	1.27	1.51	1.05	0.22									0.6831	0.3316	0.7673	0.7723	0.0074	0.0432	0.8741	0.5333	0.546	0.3679	0.6245	0.6388	0.0045	0.0116	0.3481	0.2295	0.3035	0.4839	0.3583
	1530			dodecanedioate (C12-DC)	LC/MS neg	32388	C02678	HMDB00623	12736		1.03	0.89	2.14	0.98	1.71	0.92	3.54	1.02	1.28	1.11	1.18	0.32									0.8935	0.3952	0.6636	0.7403	0.0018	0.0167	0.9679	0.558	0.0987	0.1345	0.7425	0.6888	2.1269e-05	0.0002	0.9469	0.4113	0.3305	0.5028	0.6816
	1533			dodecadienoate (12:2)*	LC/MS neg	62276					1.12	0.93	1	0.66	0.9	1.03	0.81	0.73	0.87	0.72	0.89	0.65									0.4929	0.2708	0.6619	0.7403	0.8157	0.5388	0.0119	0.031	0.5211	0.3607	0.9221	0.7438	0.1245	0.1441	0.0411	0.0653	0.4135	0.5448	0.0583
	1535			tetradecanedioate (C14-DC)	LC/MS neg	35669		HMDB00872	13185		1.01	0.89	3.81	0.93	2.7	1.47	10.24	1.54	1.04	0.92	1.53	0.14									0.9118	0.4008	0.8303	0.7873	0.0006	0.0082	0.5973	0.426	0.0509	0.0914	0.1945	0.3737	1.2626e-06	2.3915e-05	0.3212	0.2218	0.9689	0.7219	0.8866
	1539			hexadecanedioate (C16-DC)	LC/MS neg	35678	C19615	HMDB00672	10459		0.68	1.08	6.15	0.83	2.52	1.21	22.79	0.93	1.04	1.64	1.26	0.07									0.2397	0.167	0.7793	0.7749	0.0016	0.0151	0.5902	0.4238	0.254	0.2361	0.5735	0.6187	1.852e-06	2.9465e-05	0.7981	0.3752	0.9569	0.7207	0.1635
	1540			hexadecenedioate (C16:1-DC)*	LC/MS neg	61862					0.63	2.44	6.85	0.62	2.94	3.77	31.95	0.96	0.78	3.01	2.93	0.09									0.3468	0.2147	0.1335	0.3957	0.0023	0.0195	0.173	0.2058	0.1228	0.1493	0.0125	0.065	1.6566e-06	2.8649e-05	0.7756	0.3684	0.6712	0.6402	0.047
	1542			octadecanedioate (C18-DC)	LC/MS neg	36754		HMDB00782	70095		0.5	0.71	7.19	0.63	1.25	0.7	17.86	0.63	1.22	1.71	0.86	0.06									0.0726	0.0681	0.5122	0.6854	0.0019	0.017	0.217	0.231	0.923	0.4828	0.5396	0.6145	7.3427e-06	8.2693e-05	0.2327	0.1791	0.7865	0.6805	0.1521
	1543			octadecenedioate (C18:1-DC)*	LC/MS neg	61861					0.33	0.81	8.95	0.61	0.96	0.77	25.94	0.58	1.26	3.08	0.97	0.07									0.0082	0.0133	0.6218	0.7306	0.002	0.0175	0.2091	0.2271	0.6987	0.4143	0.55	0.6187	1.9268e-06	2.9476e-05	0.1747	0.1512	0.6711	0.6402	0.0097
	1544			octadecadienedioate (C18:2-DC)*	LC/MS neg	61860					0.48	0.86	8.04	0.87	1.27	0.67	21.11	0.67	1.41	2.53	0.94	0.08									0.0905	0.0797	0.7933	0.781	0.0011	0.0116	0.6896	0.4653	0.7217	0.4237	0.3769	0.5267	2.2491e-05	0.0002	0.3084	0.2177	0.5177	0.5825	0.0405
	1545			nonadecanedioate (C19-DC)	LC/MS neg	62867					0.33	0.72	2.12	0.82	0.41	0.41	2.6	0.46	1.44	3.13	0.59	0.56									0.0029	0.0061	0.4897	0.6829	0.1692	0.2235	0.4338	0.3564	0.044	0.0841	0.0765	0.211	0.0161	0.0306	0.0633	0.0821	0.6528	0.639	0.0054
	1546			eicosanedioate (C20-DC)	LC/MS neg	39831			75502		0.25	0.48	2.27	0.56	0.35	0.36	3.2	0.42	1.64	3.19	0.59	0.42									0.0007	0.0022	0.1506	0.4242	0.1571	0.2149	0.1177	0.1598	0.0206	0.0545	0.0483	0.1676	0.0099	0.0211	0.0361	0.0588	0.5405	0.5959	0.0071
	1548			docosadioate (C22-DC)	LC/MS neg	39837	C19625		244872		0.25	0.46	1.5	0.47	0.28	0.31	1.71	0.32	1.91	3.53	0.6	0.67									0.0007	0.0022	0.1202	0.3727	0.3729	0.3484	0.0687	0.1071	0.0087	0.0307	0.0498	0.1706	0.0735	0.1005	0.0265	0.0489	0.4912	0.5715	0.0077
	1553			2-hydroxysebacate	LC/MS polar	63357		HMDB00424	128458		0.78	0.93	2.44	1.12	0.77	0.43	2.38	0.51	2.16	2.57	0.92	0.55									0.2719	0.1813	0.9204	0.8022	0.0111	0.0531	0.5709	0.4141	0.372	0.301	0.0054	0.0364	0.0066	0.0153	0.0276	0.05	0.0195	0.111	0.0015
	1581		Fatty Acid, Amide	N-linoleoylserine*	LC/MS neg	61823					0.52	0.76	2.24	0.69	0.37	0.53	1.6	0.48	1	1.46	0.53	0.44									0.1041	0.0893	0.6023	0.7276	0.1414	0.2047	0.3538	0.314	0.0141	0.0422	0.1302	0.2904	0.5641	0.3889	0.0578	0.0789	0.8179	0.6849	0.3673
	1594		Fatty Acid, Amino	2-aminoheptanoate	LC/MS pos early	43761			227939		0.97	0.56	1.01	0.72	0.94	0.46	0.97	0.6	1.65	0.95	0.77	0.58									0.7564	0.3547	0.0073	0.0773	0.9985	0.5902	0.0936	0.1352	0.7979	0.4483	0.001	0.0114	0.9581	0.5221	0.0193	0.0382	0.0272	0.1342	0.8111
	1612		Fatty Acid Metabolism (also BCAA Metabolism)	butyrylcarnitine (C4)	LC/MS pos early	32412	C02862	HMDB02013	439829		2.43	0.99	1.29	1.28	0.68	0.51	0.36	0.66	1.09	0.45	0.56	0.81									0.046	0.0476	0.6529	0.7397	0.5183	0.4213	0.2928	0.2803	0.3448	0.2863	0.0621	0.1849	0.0233	0.0409	0.197	0.1618	0.9622	0.7207	0.1047
	1615			propionylcarnitine (C3)	LC/MS pos early	32452	C03017	HMDB00824	107738		1.41	1.51	1.1	2.94	0.47	0.44	0.37	0.85	1.27	1.36	0.56	3.17									0.2748	0.1826	0.244	0.5113	0.4689	0.3987	0.0015	0.0077	0.0036	0.0163	0.0091	0.0528	0.0013	0.0044	0.6338	0.3293	0.5454	0.6	0.4971
	1618			methylmalonate (MMA)	LC/MS polar	1496	C02170	HMDB00202	487		0.74	1.06	1.34	1.39	0.7	0.85	1.27	1.12	1.01	1.45	0.86	1.27									0.1687	0.1288	0.9495	0.804	0.2756	0.2947	0.15	0.1863	0.1403	0.1621	0.3618	0.5223	0.3223	0.2725	0.6304	0.328	0.9927	0.727	0.1483
	1640		Fatty Acid Metabolism (Acyl Glycine)	N-palmitoylglycine	LC/MS neg	42092		HMDB13034	151008		0.84	1.22	2.89	0.3	0.62	1.46	2.14	0.36	1.41	2.05	2.06	0.35									0.464	0.2616	0.7137	0.7552	0.0049	0.0327	0.0069	0.02	0.0729	0.1145	0.4783	0.5938	0.0655	0.0918	0.0161	0.0347	0.3221	0.5018	0.0421
	1644			N-linoleoylglycine	LC/MS neg	32462			6433346		0.54	1.07	2.87	0.17	0.41	1.48	2.16	0.24	2	3.93	2.97	0.43									0.0957	0.0836	0.9836	0.8106	0.0273	0.0879	0.0013	0.0071	0.034	0.0727	0.7191	0.6771	0.079	0.1062	0.0036	0.017	0.1321	0.336	0.0028
	1654		Fatty Acid Metabolism (Acyl Carnitine, Short Chain)	acetylcarnitine (C2)	LC/MS pos early	32198	C02571	HMDB00201	1		1.5	1.03	0.61	1.67	0.83	0.59	0.34	0.96	1.08	0.74	0.64	2.11									0.0249	0.0294	0.8307	0.7873	0.0164	0.0666	0.0098	0.0262	0.2673	0.2421	0.0069	0.0422	1.0347e-06	2.1661e-05	0.7238	0.3542	0.5784	0.6153	0.1249
	1658		Fatty Acid Metabolism (Acyl Carnitine, Medium Chain)	hexanoylcarnitine (C6)	LC/MS pos early	32328		HMDB00705	6426853		1.29	0.9	1.41	0.96	0.58	0.63	0.63	0.67	0.89	0.62	0.56	0.66									0.6125	0.3112	0.8483	0.7873	0.3025	0.3142	0.8826	0.5333	0.1296	0.1553	0.1867	0.365	0.3156	0.2688	0.2012	0.1635	0.905	0.708	0.4156
	1661			octanoylcarnitine (C8)	LC/MS pos late	33936	C02838	HMDB00791	123701		0.7	0.97	1.59	0.64	0.3	0.74	0.68	0.49	1.34	1.85	0.99	1.34									0.2657	0.1788	0.8698	0.7879	0.0958	0.1668	0.2703	0.2634	0.0007	0.0049	0.2379	0.4255	0.3718	0.2999	0.0384	0.0623	0.2778	0.4702	0.0464
	1669		Fatty Acid Metabolism (Acyl Carnitine, Long Chain Saturated)	palmitoylcarnitine (C16)	LC/MS pos late	44681	C02990	HMDB00222	461		1.19	0.8	1.23	0.72	1.08	0.88	1.11	0.79	0.84	0.56	0.74	0.4									0.5803	0.3006	0.4759	0.6829	0.3395	0.3304	0.2125	0.2285	0.7467	0.4344	0.7549	0.695	0.9326	0.5167	0.3933	0.2429	0.6638	0.6398	0.0953
	1671			stearoylcarnitine (C18)	LC/MS pos late	34409		HMDB00848	6426855		0.99	0.59	1.17	0.85	0.85	0.67	1	0.97	0.75	0.44	0.5	0.43									0.9804	0.4177	0.059	0.2643	0.3067	0.3144	0.4225	0.35	0.2449	0.2354	0.1216	0.2811	0.9045	0.5067	0.6593	0.3365	0.274	0.4692	0.0046
	1682		Fatty Acid Metabolism (Acyl Carnitine, Monounsaturated)	cis-4-decenoylcarnitine (C10:1)	LC/MS pos late	38178					1.17	0.54	1.98	0.77	0.47	0.56	0.79	0.81	1.19	0.55	0.67	0.56									0.2212	0.1565	0.0654	0.2768	0.0111	0.0531	0.3111	0.2937	0.0308	0.0682	0.0813	0.2181	0.4223	0.3242	0.3639	0.234	0.2643	0.464	0.0519
	1687			palmitoleoylcarnitine (C16:1)*	LC/MS pos late	53223			71464547		2.27	0.6	1.86	0.78	1.13	0.67	0.93	0.87	0.72	0.19	0.48	0.18									0.1161	0.0954	0.4132	0.6449	0.0795	0.1527	0.6836	0.4628	0.9765	0.4986	0.5006	0.5958	0.8687	0.4936	0.7938	0.3737	0.4615	0.5601	0.0032
	1688			oleoylcarnitine (C18:1)	LC/MS pos late	35160		HMDB05065	6441392		1.63	0.5	1.66	0.34	1.22	1.29	1.25	0.88	1	0.31	1.29	0.22									0.1422	0.1121	0.0429	0.2268	0.0613	0.1333	0.0013	0.0073	0.8786	0.4693	0.4798	0.5938	0.56	0.3881	0.4964	0.2856	0.8662	0.6917	0.0016
	1693		Fatty Acid Metabolism (Acyl Carnitine, Polyunsaturated)	linoleoylcarnitine (C18:2)*	LC/MS pos late	46223		HMDB06469	6450015		1.69	0.24	1.62	0.52	0.7	0.51	0.67	1.11	1.14	0.16	0.58	0.27									0.1919	0.1412	0.0084	0.0817	0.111	0.1785	0.0909	0.1316	0.3996	0.3136	0.2525	0.438	0.5876	0.3975	0.9218	0.4032	0.4796	0.5664	0.0017
	1706		Fatty Acid Metabolism (Acyl Carnitine, Dicarboxylate)	adipoylcarnitine (C6-DC)	LC/MS pos early	52988		HMDB61677	71296139		1.29	0.96	2.22	1.13	0.61	0.51	1.05	0.6	1.09	0.81	0.56	0.47									0.4336	0.2518	0.8931	0.7947	0.0264	0.0879	0.7547	0.4951	0.063	0.1037	0.047	0.1639	0.6979	0.4412	0.116	0.1196	0.9647	0.7207	0.3834
	1716		Fatty Acid Metabolism (Acyl Carnitine, Hydroxy)	(R)-3-hydroxybutyrylcarnitine	LC/MS pos early	43264		HMDB13127	53481617		4.63	1.62	0.42	3.2	2.76	0.4	0.25	0.79	3.05	1.07	1.22	3.39									0.0035	0.0071	0.3199	0.5776	0.065	0.1374	0.0068	0.02	0.0361	0.0742	0.0515	0.1723	0.0071	0.0164	0.89	0.3969	0.0266	0.1333	0.857
	1717			(S)-3-hydroxybutyrylcarnitine	LC/MS pos early	52984		HMDB13127			1.99	1.11	1.01	1.11	0.99	0.75	0.5	0.75	1.32	0.73	0.98	1.09									0.0052	0.0098	0.6305	0.7359	0.8171	0.5388	0.7162	0.4772	0.9986	0.5029	0.1975	0.3758	0.0093	0.0201	0.161	0.1428	0.1517	0.3637	0.3041
	1724		Carnitine Metabolism	deoxycarnitine	LC/MS pos early	36747	C01181	HMDB01161	134		1.74	1.15	0.78	1.03	0.83	0.56	0.37	0.5	1.05	0.7	0.58	0.93									0.0112	0.0164	0.5562	0.7099	0.1974	0.2416	0.8606	0.5326	0.546	0.3679	0.0045	0.0313	5.9991e-05	0.0004	0.0015	0.0097	0.5283	0.5922	0.1541
	1725			carnitine	LC/MS pos early	15500	C00318	HMDB00062	10917		1.67	1.34	1.05	1.49	0.68	0.62	0.43	0.68	0.75	0.61	0.47	0.96									0.0074	0.0127	0.1268	0.3846	0.8387	0.5442	0.0605	0.1004	0.1023	0.1358	0.0115	0.0619	0.0001	0.0008	0.028	0.0505	0.215	0.4169	0.0155
	1731		Ketone Bodies	3-hydroxybutyrate (BHBA)	LC/MS polar	542	C01089	HMDB00357	441		1.14	0.97	0.87	1.53	0.98	0.77	0.75	1.22	0.62	0.52	0.48	0.86									0.4695	0.2616	0.5298	0.6959	0.6925	0.4973	0.0878	0.128	0.9521	0.4912	0.3022	0.4814	0.2924	0.2592	0.1873	0.1566	0.1866	0.3914	0.0105
	1735		Fatty Acid Metabolism (Acyl Choline)	palmitoylcholine	LC/MS pos late	52944			151731		0.15	1.13	0.52	1.5	0.55	0.99	1.9	1.32	0.77	5.71	0.76	3.98									4.771e-06	5.0419e-05	0.9408	0.8033	0.0485	0.1183	0.2418	0.2503	0.0939	0.132	0.9836	0.7543	0.0966	0.1202	0.2634	0.1957	0.8254	0.6849	7.331e-06
	1736			oleoylcholine	LC/MS pos late	53260					0.43	1.24	0.52	0.74	0.97	1.67	1.15	0.99	0.89	2.53	1.48	2.17									0.0624	0.061	0.6668	0.741	0.263	0.2909	0.2482	0.2528	0.5799	0.3773	0.1332	0.2935	0.818	0.4795	0.9448	0.411	0.8366	0.6854	0.0149
	1740			linoleoylcholine*	LC/MS pos late	57463					0.14	1.02	0.44	1.4	0.58	0.74	1.83	1.03	0.95	6.89	0.7	3.85									1.5855e-06	2.5133e-05	0.8028	0.781	0.0106	0.0524	0.3298	0.3017	0.088	0.1277	0.3965	0.5382	0.1724	0.1834	0.705	0.3488	0.7873	0.6805	1.4955e-06
	1742			stearoylcholine*	LC/MS pos late	57464					0.14	1.06	0.43	1.73	0.64	0.77	1.97	1.26	0.76	5.77	0.59	3.7									7.6628e-06	6.7483e-05	0.7986	0.781	0.0269	0.0879	0.1222	0.162	0.2041	0.2072	0.5087	0.6015	0.0967	0.1202	0.248	0.1873	0.7986	0.6834	3.42e-05
	1744			arachidonoylcholine	LC/MS pos late	53261					0.15	0.78	0.42	1.62	0.51	0.6	1.42	1.25	0.73	3.81	0.44	3.35									8.2291e-06	7.0511e-05	0.1802	0.446	0.009	0.0473	0.1376	0.1775	0.123	0.1493	0.1309	0.2908	0.3565	0.2929	0.1888	0.1574	0.7755	0.6805	0.0009
	1750		Fatty Acid, Monohydroxy	alpha-hydroxycaproate	LC/MS neg	37073		HMDB01624	99824		0.95	3.1	1.89	0.98	0.57	0.92	1.13	0.29	0.89	2.88	0.82	0.75									0.8791	0.3909	0.0009	0.0184	0.0747	0.1473	0.8447	0.5274	0.1654	0.1816	0.9299	0.7453	0.7893	0.468	0.0012	0.0082	0.6077	0.6225	0.0052
	1751			2-hydroxyheptanoate*	LC/MS polar	61827			2750949		0.57	1.82	0.95	1.4	0.69	0.57	1.15	0.44	1.29	4.09	0.73	1.54									0.0046	0.0089	0.0013	0.0267	0.7984	0.5388	0.0868	0.1275	0.0489	0.0894	0.0059	0.038	0.4642	0.3497	4.6338e-05	0.0008	0.2047	0.4055	5.6718e-09
	1752			2-hydroxyoctanoate	LC/MS neg	22036		HMDB02264	94180		0.87	0.74	3.4	0.65	0.85	0.75	3.34	0.67	1.15	0.98	0.87	0.2									0.423	0.247	0.1433	0.4111	1.2744e-05	0.0006	0.0671	0.1059	0.3233	0.2789	0.2301	0.4181	2.225e-05	0.0002	0.1154	0.1196	0.5082	0.5765	0.9844
	1753			2-hydroxydecanoate	LC/MS neg	42489			21488		1.14	3.32	3.42	1.37	0.77	1.02	2.32	0.42	0.96	2.81	0.98	0.51									0.5133	0.2767	0.0007	0.0176	4.7746e-05	0.0013	0.2494	0.2529	0.203	0.2069	0.9484	0.7484	0.01	0.0213	0.0182	0.0374	0.9768	0.7221	0.0047
	1754			2-hydroxylaurate	LC/MS neg	52916			97783		1.43	0.98	1.15	0.76	1.17	0.82	0.94	0.63	1.54	1.05	1.25	0.7									0.0224	0.0272	0.9353	0.8033	0.3045	0.3142	0.0729	0.1113	0.3203	0.2776	0.1292	0.2904	0.7307	0.4499	0.0022	0.0126	0.0054	0.0495	0.6211
	1756			2-hydroxypalmitate	LC/MS neg	35675		HMDB31057	92836		0.97	1.07	1.84	0.63	0.8	1.18	1.51	0.69	1	1.11	1.18	0.5									0.6704	0.3295	0.5092	0.6854	0.0003	0.0047	0.0052	0.0169	0.0892	0.1284	0.2563	0.4417	0.0091	0.0197	0.0172	0.0363	0.8241	0.6849	0.3891
	1758			2-hydroxystearate	LC/MS neg	17945	C03045		69417		0.73	0.84	1.56	0.71	0.8	0.93	1.72	0.78	0.82	0.95	0.76	0.43									0.0165	0.022	0.1531	0.4269	0.0005	0.0073	0.0065	0.0194	0.0463	0.0863	0.5574	0.6187	0.0001	0.0008	0.0495	0.0714	0.136	0.3426	0.6462
	1759			2-hydroxyarachidate*	LC/MS neg	61700			5225199		0.92	0.88	2.36	0.55	0.81	1	2.07	0.63	0.83	0.8	0.83	0.24									0.7275	0.3437	0.5526	0.7083	1.6127e-05	0.0006	0.0024	0.0109	0.1193	0.1472	0.9103	0.7385	0.0006	0.0022	0.0148	0.0335	0.3688	0.5319	0.2545
	1760			2-hydroxybehenate	LC/MS neg	57663			193484		0.8	0.96	2.45	0.42	0.75	1.25	2.3	0.54	0.66	0.79	0.82	0.19									0.3677	0.2246	0.9941	0.8125	0.0002	0.0043	0.0008	0.0049	0.0834	0.1231	0.3307	0.5001	0.0025	0.0071	0.0106	0.0295	0.0943	0.2865	0.4194
	1762			2-hydroxynervonate*	LC/MS neg	61698			5312783		0.9	0.67	2.39	0.34	1.26	1.84	3.32	0.93	0.76	0.56	1.4	0.16									0.6774	0.3308	0.1396	0.4049	0.0005	0.0073	0.0002	0.0017	0.6859	0.4116	0.032	0.1263	4.542e-05	0.0003	0.6552	0.3358	0.2364	0.4394	0.028
	1765			3-hydroxyhexanoate	LC/MS neg	53230			151492		1.46	0.66	1.78	0.58	1.26	0.84	1.53	0.73	0.63	0.28	0.52	0.14									0.1746	0.1321	0.1569	0.4269	0.0288	0.0912	0.1009	0.1427	0.918	0.4822	0.4429	0.5733	0.3226	0.2725	0.317	0.2199	0.1553	0.3661	0.0002
	1768			3-hydroxydecanoate	LC/MS neg	22053		HMDB02203	26612		1.31	1.12	1.42	0.89	0.84	1.12	0.91	0.89	0.95	0.81	1.06	0.79									0.225	0.1581	0.6103	0.7276	0.0359	0.104	0.4845	0.3787	0.2479	0.2361	0.5597	0.6187	0.8248	0.4813	0.5315	0.3003	0.8004	0.6834	0.3356
	1771			3-hydroxylaurate	LC/MS neg	32457		HMDB00387	94216		1.47	1.12	1.38	0.57	1.14	1.15	1.07	0.58	1.1	0.84	1.27	0.46									0.0774	0.0707	0.6155	0.7306	0.0668	0.1378	0.0062	0.019	0.7561	0.4374	0.5262	0.6121	0.7018	0.4417	0.0087	0.0261	0.4934	0.5728	0.5365
	1786			16-hydroxypalmitate	LC/MS neg	39609	C18218	HMDB06294	10466		1.28	1.07	3.21	0.53	1.92	1.24	4.81	0.62	0.88	0.73	1.09	0.09									0.7806	0.3629	0.8569	0.7873	0.0007	0.0082	0.072	0.1102	0.3875	0.3102	0.565	0.6187	0.0001	0.0008	0.1537	0.1398	0.7197	0.659	0.6478
	1790			13-HODE + 9-HODE	LC/MS neg	37752			43013		0.57	1.21	0.94	0.7	0.61	0.64	1	0.37	3.39	7.19	2.15	2.64									0.0594	0.0587	0.4837	0.6829	0.9994	0.5902	0.4911	0.3823	0.0914	0.1301	0.0779	0.2121	0.8313	0.4827	0.0029	0.0145	0.0003	0.0103	1.3938e-07
	1804			3-hydroxystearate	LC/MS neg	52938			5282907		0.7	1.84	1.97	0.62	0.73	1.46	2.05	0.49	0.85	2.25	1.25	0.54									0.1856	0.1374	0.0307	0.185	0.0226	0.0795	0.0608	0.1004	0.287	0.2582	0.1877	0.3656	0.0119	0.0242	0.0074	0.0242	0.5973	0.622	0.0042
	1815		Fatty Acid, Dihydroxy	12,13-DiHOME	LC/MS neg	38395	C14829	HMDB04705	10236635		0.86	1.26	2.45	0.82	0.73	0.68	2.07	0.44	2.88	4.23	1.97	0.9									0.5884	0.3028	0.5085	0.6854	0.0338	0.0999	0.6158	0.4334	0.3346	0.2816	0.3076	0.4846	0.0837	0.1103	0.0342	0.0569	0.0071	0.0594	0.0003
	1816			9,10-DiHOME	LC/MS neg	38399	C14828	HMDB04704	9966640		0.79	1.4	2.11	0.83	0.57	0.93	1.52	0.56	2.44	4.31	2.28	1.58									0.4695	0.2616	0.33	0.5801	0.0428	0.1132	0.9706	0.558	0.1375	0.161	0.5844	0.6212	0.1969	0.2008	0.1242	0.1235	0.0114	0.0798	0.0001
	1818			2S,3R-dihydroxybutyrate	LC/MS polar	62950		HMDB02453	10964471		1.32	1.11	1.18	1.89	1.16	1.26	1.04	2.14	0.87	0.73	1.1	1.51									0.114	0.0943	0.5824	0.7195	0.2695	0.2925	0.0032	0.0126	0.4447	0.3354	0.1562	0.3302	0.7867	0.4677	0.0003	0.0027	0.462	0.5601	0.0791
	1819			2R,3R-dihydroxybutyrate	LC/MS polar	63109		HMDB00498	13120901		1.18	0.78	1.22	1.25	1.55	1.43	1.6	2.31	1.23	0.81	1.77	1.17									0.2507	0.1713	0.1278	0.3846	0.2381	0.2737	0.2578	0.2574	0.0065	0.0251	0.0497	0.1706	0.0059	0.0143	4.0466e-05	0.0008	0.1195	0.3278	0.2654
	1821			2,4-dihydroxybutyrate	LC/MS polar	62951		HMDB00360	192742		1.02	0.72	1.19	1.1	1.14	1.1	1.33	1.67	1.29	0.92	1.42	1.15									0.8846	0.3923	0.0102	0.0897	0.2268	0.2656	0.4842	0.3787	0.3311	0.2811	0.4511	0.5765	0.0463	0.072	0.0002	0.0024	0.0675	0.2365	0.333
	1822			3,4-dihydroxybutyrate	LC/MS polar	62952					1.15	1.05	1.31	1.4	1.02	1.13	1.17	1.51	0.87	0.8	0.99	1.04									0.2227	0.1572	0.6585	0.7403	0.0455	0.1166	0.0188	0.0438	0.7301	0.4278	0.2846	0.4691	0.2444	0.2303	0.0038	0.0176	0.3581	0.5208	0.0933
	1855		Eicosanoid	thromboxane B2	LC/MS neg	17807	C05963	HMDB03252	5283137		0.07	0.95	0.11	1.14	0.49	1.3	0.78	1.56	0.56	7.88	0.73	15.72									2.4392e-05	0.0002	0.9943	0.8125	0.0029	0.0225	0.4001	0.3374	0.061	0.101	0.6789	0.6595	0.8179	0.4795	0.2156	0.1714	0.1358	0.3426	0.0018
	1921			12-HHTrE	LC/MS neg	57393	C20388	HMDB12535	5283141		0.06	0.9	0.03	1.2	0.59	1.17	0.34	1.56	0.66	10.08	0.77	46.62									0.0002	0.0007	0.777	0.7749	4.984e-05	0.0013	0.2427	0.2503	0.4689	0.3415	0.8015	0.7156	0.2642	0.2421	0.5196	0.2953	0.329	0.5028	0.0011
	1929		Endocannabinoid	oleoyl ethanolamide	LC/MS neg	38102		HMDB02088	5283454		0.71	0.83	1.46	0.07	0.71	1.68	1.46	0.15	5.8	6.73	9.76	0.68									0.4682	0.2616	0.9063	0.799	0.3821	0.3548	5.2664e-08	7.4748e-06	0.4682	0.3415	0.0226	0.1012	0.3821	0.307	7.425e-05	0.0013	0.0004	0.0137	7.425e-05
	1941			N-arachidonoyltaurine	LC/MS neg	54748					0.77	0.43	1	0.43	1.6	0.81	2.09	0.81	1	0.56	0.81	0.22									0.4608	0.2614	0.0099	0.0884	0.931	0.5754	0.0528	0.0939	0.2442	0.2354	0.2248	0.4143	0.0518	0.0778	0.6152	0.326	0.9008	0.7067	0.0708
	1942			N-oleoyltaurine	LC/MS neg	39732			6437033		1.8	0.71	1.75	0.6	2.1	1.3	2.04	1.11	1.06	0.42	1.38	0.23									0.075	0.0693	0.236	0.5014	0.0641	0.1361	0.0581	0.0982	0.0726	0.1145	0.3416	0.5035	0.0621	0.0876	0.8369	0.3858	0.8589	0.6909	0.0072
	1943			N-stearoyltaurine	LC/MS neg	39730			168274		0.74	0.82	0.84	0.84	1.26	0.79	1.42	0.81	0.96	1.05	0.75	0.6									0.1931	0.1417	0.3975	0.6388	0.45	0.3899	0.3507	0.3137	0.5233	0.361	0.3491	0.5117	0.2351	0.2264	0.3063	0.2171	0.8065	0.6837	0.8235
	1944			N-palmitoyltaurine	LC/MS neg	39835					1.45	0.82	1.55	0.85	1.52	0.82	1.63	0.85	0.98	0.55	0.8	0.29									0.4103	0.2422	0.3864	0.6266	0.2669	0.2925	0.5252	0.3944	0.6696	0.406	0.6411	0.6442	0.473	0.3516	0.8158	0.3813	0.8867	0.6977	0.0727
	1946			N-linoleoyltaurine*	LC/MS neg	61826					1.99	0.72	1.68	0.5	1.87	0.98	1.58	0.68	1.53	0.55	1.49	0.24									0.073	0.0682	0.3082	0.5716	0.0405	0.1103	0.0289	0.0609	0.4056	0.3173	0.9357	0.7453	0.2695	0.2458	0.1916	0.1585	0.177	0.3799	0.1411
	1951			linoleoyl ethanolamide	LC/MS neg	52608		HMDB12252	5283446		0.33	1.08	1.66	0.12	0.31	1.07	1.57	0.12	4.25	14.02	4.55	1.09									0.0473	0.0487	0.9952	0.8125	0.4788	0.4017	0.0023	0.0108	0.037	0.0751	0.9782	0.7538	0.5506	0.3862	0.0021	0.0125	0.0171	0.101	6.6334e-05
	1964			N-oleoylserine	LC/MS neg	57664					0.65	0.73	3.8	0.33	0.5	1.12	2.93	0.51	0.92	1.02	1.04	0.18									0.3283	0.2065	0.4768	0.6829	0.0056	0.0344	0.0186	0.0437	0.1208	0.1478	0.622	0.6383	0.024	0.0414	0.2159	0.1714	0.7208	0.659	0.9307
	1965			N-stearoylserine*	LC/MS neg	61822					0.49	0.83	1.45	0.96	0.42	0.5	1.24	0.58	0.57	0.96	0.29	0.45									0.0335	0.0375	0.6845	0.7491	0.2676	0.2925	0.5535	0.4047	0.0111	0.0359	0.066	0.1916	0.5181	0.3693	0.0444	0.067	0.0459	0.1811	0.7925
	1969		Inositol Metabolism	myo-inositol	LC/MS polar	1124	C00137	HMDB00211	892		0.82	0.93	0.8	1.08	0.93	0.92	0.91	1.07	1.16	1.31	1.06	1.54									0.2841	0.1877	0.4921	0.6829	0.0697	0.142	0.5665	0.4121	0.8022	0.4484	0.5236	0.6121	0.3062	0.2656	0.5336	0.3003	0.194	0.3961	0.0948
	1970			chiro-inositol	LC/MS polar	37112	C19891	HMDB34220			0.81	5.81	0.61	3.07	2.03	1.1	1.54	0.58	0.75	5.42	0.83	2.06									0.3094	0.2014	4.9398e-05	0.003	0.084	0.156	0.0014	0.0075	0.065	0.1057	0.6692	0.6571	0.2546	0.2376	0.1143	0.1191	0.3769	0.534	3.3239e-05
	1998		Phospholipid Metabolism	choline	LC/MS pos early	15506	C00114	HMDB00097	305		0.68	0.9	0.65	1	0.77	0.94	0.74	1.05	1.34	1.78	1.26	2.54									0.0001	0.0005	0.2481	0.5146	4.6323e-05	0.0013	0.9254	0.5473	0.0065	0.0251	0.4456	0.5733	0.0032	0.0089	0.6216	0.3265	0.0019	0.0278	1.6958e-07
	1999			choline phosphate	LC/MS pos early	34396	C00588	HMDB01565	1014		4.07	1.71	0.69	1.05	0.71	1.23	0.12	0.76	0.73	0.31	0.89	1.9									0.5697	0.2986	0.1981	0.466	0.3364	0.3303	0.9573	0.5576	0.5557	0.3718	0.5716	0.6187	0.0396	0.0632	0.4316	0.2611	0.5517	0.6043	0.8908
	2002			glycerophosphorylcholine (GPC)	LC/MS pos early	15990	C00670	HMDB00086	71920		0.33	0.96	0.61	0.9	0.65	1.02	1.18	0.96	0.77	2.2	0.79	1.79									1.2205e-09	1.0036e-07	0.8414	0.7873	0.0007	0.0082	0.3056	0.2892	0.0019	0.0102	0.7118	0.6747	0.2051	0.2076	0.6439	0.3324	0.0375	0.1625	9.0113e-07
	2004			phosphoethanolamine	LC/MS neg	1600	C00346	HMDB00224	1015		1.7	1.07	1.02	1.2	0.92	0.68	0.55	0.76	1.19	0.75	0.81	1.04									0.0128	0.0181	0.7492	0.7691	0.8003	0.5388	0.6041	0.4273	0.5081	0.3531	0.0802	0.216	0.0046	0.0116	0.1181	0.1196	0.3902	0.5346	0.1587
	2006			glycerophosphoethanolamine	LC/MS polar	37455	C01233	HMDB00114	123874		1.71	1.08	1.11	0.85	1.14	1.24	0.74	0.97	1.16	0.73	1.44	0.96									5.962e-05	0.0003	0.5326	0.6959	0.5219	0.4227	0.1982	0.2233	0.2191	0.2178	0.0682	0.197	0.0105	0.0221	0.9543	0.413	0.2291	0.4276	0.0094
	2007			glycerophosphoserine*	LC/MS pos early	57404			3081457		1.05	0.96	1.03	0.97	1.31	1.42	1.28	1.43	1.6	1.47	2.28	1.64									0.6827	0.3316	0.9408	0.8033	0.8636	0.5556	0.7416	0.4906	0.0328	0.0714	0.0052	0.0355	0.055	0.0796	0.01	0.0284	0.001	0.0232	0.0037
	2008			glycerophosphoinositol*	LC/MS polar	47155			167572		0.77	0.82	1.1	1.13	0.88	1.14	1.25	1.57	1.05	1.12	1.2	1.4									0.0811	0.073	0.2161	0.4821	0.4818	0.4024	0.3682	0.32	0.4483	0.3357	0.1712	0.3477	0.0906	0.1155	0.0011	0.0081	0.8006	0.6834	0.4332
	2009			trimethylamine N-oxide	LC/MS pos early	40406	C01104	HMDB00925	1145		1.35	1.36	0.58	1.97	0.58	0.97	0.25	1.41	0.74	0.75	0.72	4.18									0.4308	0.2511	0.4572	0.6732	0.0484	0.1183	0.5248	0.3944	0.3263	0.2796	0.9448	0.7484	0.0005	0.0022	0.8588	0.3912	0.6039	0.6225	0.573
	2027		Phosphatidylcholine (PC)	1-myristoyl-2-palmitoyl-GPC (14:0/16:0)	LC/MS pos late	19258		HMDB07869	129657		0.62	1.03	1.15	0.63	1.03	1.2	1.91	0.73	1	1.65	1.2	0.63									0.023	0.0276	0.8238	0.7873	0.4164	0.3728	0.0068	0.02	0.7547	0.4374	0.3206	0.4915	0.0013	0.0043	0.0428	0.0655	0.8489	0.6896	0.0085
	2031			1-myristoyl-2-arachidonoyl-GPC (14:0/20:4)*	LC/MS pos late	53195		HMDB07883			0.65	0.59	1	0.85	1.01	0.75	1.57	1.07	1.01	0.92	0.75	0.63									0.0149	0.0205	0.0049	0.0605	0.9245	0.5745	0.1998	0.2233	0.9041	0.4799	0.1178	0.2756	0.0088	0.0193	0.9183	0.4028	0.9415	0.7194	0.7114
	2043			1,2-dipalmitoyl-GPC (16:0/16:0)	LC/MS pos late	19130		HMDB00564	452110		0.87	1.01	1.03	0.95	0.88	0.93	1.05	0.87	1.05	1.23	0.98	1.03									0.2569	0.1748	0.9218	0.8022	0.8105	0.5388	0.5103	0.3922	0.3096	0.2695	0.5715	0.6187	0.7185	0.4458	0.1908	0.1585	0.6606	0.6398	0.0995
	2044			1-palmitoyl-2-palmitoleoyl-GPC (16:0/16:1)*	LC/MS pos late	52470		HMDB07969			0.39	1.98	0.99	0.4	1	2.57	2.53	0.52	0.57	2.86	1.46	0.59									0.0425	0.0452	0.0311	0.1852	0.6509	0.4782	0.0039	0.0143	0.7836	0.4436	0.0042	0.03	0.0077	0.0171	0.0293	0.0519	0.2662	0.464	0.0028
	2045			1-palmitoyl-2-stearoyl-GPC (16:0/18:0)	LC/MS pos late	52616		HMDB07970			0.7	0.93	1.02	0.93	0.89	0.92	1.31	0.92	1.04	1.39	0.96	0.98									0.0866	0.0769	0.7122	0.7551	0.8785	0.5594	0.266	0.2614	0.647	0.3984	0.8241	0.7165	0.154	0.1691	0.3325	0.2266	0.8538	0.6906	0.1235
	2047			1-palmitoyl-2-oleoyl-GPC (16:0/18:1)	LC/MS pos late	52461		HMDB07972	6436017		0.59	1.39	1.18	0.42	1.11	2.17	2.21	0.65	0.75	1.76	1.62	0.52									0.0338	0.0376	0.1039	0.343	0.3041	0.3142	7.1992e-05	0.0008	0.5984	0.3835	0.0005	0.0069	0.0006	0.0024	0.0244	0.047	0.271	0.4688	0.0092
	2050			1-palmitoyl-2-linoleoyl-GPC (16:0/18:2)	LC/MS pos late	42446		HMDB07973	5287971		0.67	0.9	0.96	0.73	0.91	1	1.31	0.81	1.01	1.35	1.01	0.84									1.1845e-06	2.0863e-05	0.1188	0.3721	0.5196	0.4216	2.6815e-05	0.0004	0.1814	0.1941	0.9565	0.7484	0.0004	0.0018	0.0021	0.0125	0.8413	0.6857	6.9252e-05
	2057			1-palmitoyl-2-dihomo-linolenoyl-GPC (16:0/20:3n3 or 6)*	LC/MS pos late	52454					0.41	1.49	1.13	0.48	0.96	1.84	2.63	0.59	0.82	2.97	1.51	0.67									0.0002	0.0007	0.0384	0.2146	0.4341	0.3814	0.0005	0.0037	0.8636	0.465	0.0035	0.0265	2.8669e-05	0.0002	0.0072	0.0239	0.4589	0.5601	2.8674e-06
	2061			1-palmitoyl-2-arachidonoyl-GPC (16:0/20:4n6)	LC/MS pos late	52462		HMDB07982	10747814		0.78	0.81	1	0.75	0.88	0.95	1.13	0.88	0.88	0.92	0.84	0.72									0.0143	0.0198	0.0494	0.2413	0.9984	0.5902	0.0045	0.0156	0.1913	0.2012	0.6676	0.6571	0.2176	0.2142	0.1576	0.1418	0.1901	0.3922	0.4348
	2067			1-palmitoyl-2-docosahexaenoyl-GPC (16:0/22:6)	LC/MS pos late	52610		HMDB07991	6441886		0.86	0.58	0.76	1.24	0.97	0.34	0.87	0.72	1.04	0.71	0.35	0.59									0.5096	0.2752	0.0119	0.0925	0.2089	0.2491	0.2698	0.2634	0.9841	0.4986	1.4864e-05	0.0006	0.5295	0.3754	0.1996	0.1627	0.8307	0.6853	0.0838
	2074			1-palmitoleoyl-2-linolenoyl-GPC (16:1/18:3)*	LC/MS pos late	53180		HMDB08008			0.41	0.84	1.69	0.55	0.84	1.32	3.47	0.85	0.84	1.74	1.11	0.43									4.8795e-05	0.0003	0.4248	0.6496	0.0113	0.0536	0.0032	0.0126	0.47	0.3415	0.1396	0.303	1.6973e-07	4.8221e-06	0.3916	0.2429	0.4996	0.574	0.0031
	2084			1-stearoyl-2-oleoyl-GPC (18:0/18:1)	LC/MS pos late	52438		HMDB08038			0.52	1.33	1.15	0.33	1.22	2.22	2.68	0.56	0.74	1.87	1.63	0.39									0.0218	0.0267	0.1692	0.431	0.3752	0.3493	1.1081e-05	0.0003	0.33	0.2809	0.0008	0.0097	0.0001	0.0008	0.0065	0.0219	0.2873	0.4781	0.01
	2087			1-stearoyl-2-linoleoyl-GPC (18:0/18:2)*	LC/MS pos late	52452		HMDB08039			0.66	0.93	0.87	0.68	0.98	1	1.29	0.73	1.01	1.41	1.01	0.8									2.6024e-05	0.0002	0.4169	0.6464	0.12	0.1856	3.0616e-05	0.0005	0.7724	0.4399	0.9641	0.7497	0.005	0.0124	0.0004	0.0032	0.9446	0.7194	0.0002
	2095			1-stearoyl-2-arachidonoyl-GPC (18:0/20:4)	LC/MS pos late	42450		HMDB08048	16219824		0.82	0.68	0.83	0.76	0.92	0.79	0.93	0.87	0.93	0.77	0.73	0.73									0.1501	0.1172	0.0139	0.1019	0.1514	0.213	0.0305	0.0627	0.5551	0.3718	0.1232	0.2811	0.5582	0.3881	0.222	0.1731	0.5069	0.5765	0.0816
	2101			1-stearoyl-2-docosahexaenoyl-GPC (18:0/22:6)	LC/MS pos late	52611		HMDB08057			1.02	0.55	0.63	1.33	1.08	0.33	0.67	0.79	1.15	0.62	0.38	0.73									0.9765	0.4172	0.0244	0.1545	0.0938	0.1662	0.2596	0.2583	0.7605	0.4374	0.0001	0.0029	0.1741	0.1842	0.4117	0.2518	0.6979	0.6512	0.0611
	2109			1-oleoyl-2-linoleoyl-GPC (18:1/18:2)*	LC/MS pos late	52453					0.59	0.8	0.88	0.53	0.99	1.06	1.47	0.69	0.94	1.28	0.99	0.6									2.0882e-05	0.0002	0.0383	0.2146	0.2547	0.2869	1.1645e-06	4.9621e-05	0.8735	0.4672	0.6221	0.6383	0.0009	0.0033	0.0023	0.0126	0.5914	0.6201	0.0294
	2119			1-oleoyl-2-docosahexaenoyl-GPC (18:1/22:6)*	LC/MS pos late	52697		HMDB08123			0.55	0.6	0.82	0.3	0.94	0.6	1.4	0.3	0.89	0.97	0.53	0.21									0.0047	0.0091	0.0112	0.0908	0.3123	0.3171	5.094e-07	3.1168e-05	0.7315	0.4278	0.0107	0.0592	0.1059	0.128	4.818e-07	3.8673e-05	0.4961	0.5734	0.7346
	2120			1,2-dilinoleoyl-GPC (18:2/18:2)	LC/MS pos late	52603		HMDB08138	5288075		0.37	0.7	1.01	0.35	0.84	1.04	2.29	0.52	1.07	2.03	1.12	0.46									8.3063e-07	1.5491e-05	0.0336	0.1986	0.9975	0.5902	3.9285e-07	3.1168e-05	0.3317	0.2811	0.9215	0.7438	1.4696e-05	0.0001	0.0003	0.0029	0.5988	0.622	0.0001
	2121			1-linoleoyl-2-linolenoyl-GPC (18:2/18:3)*	LC/MS pos late	53176		HMDB08141			0.81	0.57	1.52	0.58	1.13	0.79	2.12	0.8	1.16	0.82	0.91	0.31									0.2807	0.1858	0.0195	0.1301	0.0569	0.1285	0.0158	0.0387	0.6121	0.3872	0.3122	0.4869	0.0011	0.0038	0.2727	0.2004	0.4229	0.548	0.5858
	2125			1-linoleoyl-2-arachidonoyl-GPC (18:2/20:4n6)*	LC/MS pos late	52710		HMDB08147			0.45	0.51	1.26	0.32	0.72	0.87	2.01	0.55	0.93	1.06	0.81	0.29									7.4107e-06	6.7128e-05	0.0002	0.0087	0.1322	0.1982	7.1867e-09	1.5301e-06	0.0352	0.0741	0.5503	0.6187	4.9562e-05	0.0003	0.0002	0.0023	0.4796	0.5664	0.6278
	2163		Phosphatidylethanolamine (PE)	1,2-dipalmitoyl-GPE (16:0/16:0)*	LC/MS pos late	57341		HMDB08923	445468		0.24	1.39	0.58	0.75	0.38	0.94	0.91	0.5	0.92	5.31	0.86	2.95									0.0269	0.0313	0.372	0.6172	0.4238	0.377	0.1862	0.2155	0.0482	0.089	0.9986	0.7563	0.5896	0.3978	0.0311	0.0539	0.9777	0.7221	0.0027
	2166			1-palmitoyl-2-stearoyl-GPE (16:0/18:0)*	LC/MS pos late	57388		HMDB08925	5326793		0.36	0.96	0.54	1.02	0.66	0.76	0.99	0.81	1	2.68	0.76	2.2									0.0007	0.0022	0.9798	0.81	0.0206	0.0758	0.4929	0.3823	0.1584	0.1754	0.379	0.5282	0.8832	0.499	0.1169	0.1196	0.9779	0.7221	0.0006
	2167			1-palmitoyl-2-oleoyl-GPE (16:0/18:1)	LC/MS pos late	19263		HMDB05320	5283496		0.29	1.9	0.75	0.32	0.89	2.78	2.29	0.46	0.54	3.49	1.49	0.7									0.0618	0.0607	0.122	0.3765	0.6636	0.4836	0.005	0.0168	0.8714	0.4668	0.0157	0.0771	0.1919	0.1972	0.0483	0.0703	0.4317	0.549	0.0103
	2169			1-palmitoyl-2-linoleoyl-GPE (16:0/18:2)	LC/MS pos late	42449		HMDB05322	9546747		0.46	1.08	0.73	0.65	0.76	1.02	1.21	0.61	1.06	2.49	1.08	1.27									0.0069	0.012	0.789	0.7788	0.1416	0.2047	0.1061	0.1486	0.2791	0.2517	0.9147	0.741	0.7808	0.4656	0.0496	0.0714	0.7046	0.653	0.0012
	2172			1-palmitoyl-2-arachidonoyl-GPE (16:0/20:4)*	LC/MS pos late	52464		HMDB05323	9546800		0.56	1.03	0.74	0.68	0.8	1.01	1.05	0.67	0.85	1.55	0.86	0.99									0.0003	0.0011	0.7976	0.781	0.0421	0.1119	0.0072	0.0206	0.0976	0.1339	0.9337	0.7453	0.8279	0.4814	0.0046	0.0176	0.254	0.4569	0.0036
	2174			1-palmitoyl-2-docosahexaenoyl-GPE (16:0/22:6)*	LC/MS pos late	52465		HMDB05324	9546799		0.81	0.66	0.68	1.19	1.07	0.42	0.89	0.76	1.04	0.85	0.44	0.72									0.1743	0.1321	0.0079	0.0784	0.0128	0.0569	0.2664	0.2614	0.506	0.3522	3.9911e-06	0.0002	0.5699	0.3908	0.1222	0.1225	0.7167	0.6575	0.2893
	2181			1-stearoyl-2-oleoyl-GPE (18:0/18:1)	LC/MS pos late	42448		HMDB08993			0.27	1.09	0.76	0.38	0.85	1.73	2.36	0.61	0.72	2.87	1.24	0.74									0.0003	0.0011	0.7462	0.7688	0.4054	0.3678	0.0009	0.0057	0.5339	0.363	0.0519	0.1723	0.0134	0.0263	0.0596	0.0803	0.393	0.5346	0.0012
	2184			1-stearoyl-2-linoleoyl-GPE (18:0/18:2)*	LC/MS pos late	52446		HMDB08994	9546749		0.33	0.78	0.66	0.59	0.73	0.93	1.43	0.7	0.98	2.3	0.91	1.12									1.8067e-06	2.5173e-05	0.2009	0.4673	0.0262	0.0879	0.0052	0.0169	0.083	0.1231	0.6698	0.6571	0.0983	0.1214	0.0414	0.0654	0.9764	0.7221	8.7218e-05
	2189			1-stearoyl-2-arachidonoyl-GPE (18:0/20:4)	LC/MS pos late	52447		HMDB09003	5289133		0.67	0.82	0.78	0.76	0.93	0.97	1.08	0.9	0.91	1.1	0.88	0.92									0.0002	0.0007	0.0504	0.2413	0.0117	0.0537	0.003	0.012	0.451	0.3357	0.8075	0.7165	0.4049	0.3164	0.1625	0.1433	0.2622	0.464	0.2762
	2193			1-stearoyl-2-docosahexaenoyl-GPE (18:0/22:6)*	LC/MS pos late	52466		HMDB05334	9546798		1.04	0.51	0.74	1.76	1.29	0.47	0.92	1.59	1.13	0.56	0.53	0.97									0.7057	0.3387	0.0032	0.0485	0.2023	0.2431	0.0121	0.0313	0.1973	0.2042	0.0013	0.0132	0.7168	0.4458	0.0267	0.0489	0.4123	0.5446	0.01
	2195			1-oleoyl-2-linoleoyl-GPE (18:1/18:2)*	LC/MS pos late	52687		HMDB05349	9546753		0.32	0.81	0.84	0.36	0.77	1.24	2	0.56	0.81	2.01	1.01	0.56									8.7766e-05	0.0005	0.4139	0.6449	0.4635	0.3956	0.0003	0.0024	0.2999	0.266	0.3725	0.5262	0.0112	0.0234	0.0286	0.0513	0.4971	0.5734	0.0056
	2198			1-oleoyl-2-arachidonoyl-GPE (18:1/20:4)*	LC/MS pos late	55041		HMDB09069			0.54	0.97	0.8	0.59	0.97	1.53	1.45	0.93	0.62	1.12	0.95	0.72									0.0004	0.0014	0.8332	0.7873	0.2007	0.2422	0.0007	0.0045	0.8481	0.4625	0.0076	0.0457	0.0204	0.037	0.4926	0.284	0.0053	0.0495	0.4673
	2201			1-oleoyl-2-docosahexaenoyl-GPE (18:1/22:6)*	LC/MS pos late	53209					0.47	0.47	1.26	0.37	1.08	1.18	2.89	0.91	0.49	0.5	0.58	0.16									0.0009	0.0025	0.0006	0.0162	0.3465	0.335	4.3901e-05	0.0006	0.6344	0.3943	0.5759	0.6187	1.5102e-05	0.0001	0.722	0.3539	0.0021	0.0278	0.0015
	2202			1,2-dilinoleoyl-GPE (18:2/18:2)*	LC/MS pos late	53174		HMDB09093	9546812		0.53	0.68	0.99	0.37	0.65	0.92	1.23	0.51	1.02	1.32	0.94	0.54									0.0065	0.0116	0.1569	0.4269	0.7721	0.5303	0.0019	0.0091	0.1492	0.1682	0.5942	0.6258	0.2624	0.2421	0.0185	0.0374	0.83	0.6853	0.1032
	2204			1-linoleoyl-2-arachidonoyl-GPE (18:2/20:4)*	LC/MS pos late	53189		HMDB09102			0.5	0.78	0.97	0.38	0.77	1.09	1.51	0.53	0.83	1.3	0.91	0.46									0.0005	0.0016	0.1935	0.4622	0.9448	0.5769	6.5445e-06	0.0002	0.1436	0.1638	0.6589	0.6545	0.0269	0.0455	0.001	0.0076	0.345	0.5126	0.119
	2255		Phosphatidylserine (PS)	1-stearoyl-2-oleoyl-GPS (18:0/18:1)	LC/MS pos late	19265		HMDB10163	9547087		0.78	0.82	0.69	0.63	0.85	1.52	0.75	1.16	1.17	1.24	1.77	1.91									0.053	0.0534	0.503	0.6847	0.0971	0.1677	0.0227	0.0497	0.5256	0.3619	0.0865	0.2237	0.7347	0.4502	0.9595	0.4146	0.5823	0.6171	0.0682
	2256			1-stearoyl-2-linoleoyl-GPS (18:0/18:2)	LC/MS pos late	53009			9547091		2.07	0.8	0.88	0.67	0.75	1.22	0.32	1.02	0.92	0.36	1.13	1.14									0.796	0.3679	0.5109	0.6854	0.5901	0.4539	0.1789	0.211	0.4357	0.3317	0.6229	0.6383	0.2913	0.2592	0.8328	0.3858	0.8572	0.6909	0.5623
	2258			1-stearoyl-2-arachidonoyl-GPS (18:0/20:4)	LC/MS pos late	52235		HMDB12383			1.51	1.01	0.79	0.84	1.52	0.78	0.79	0.65	1.53	1.02	1.19	0.84									0.0509	0.0515	0.851	0.7873	0.092	0.1646	0.3838	0.3282	0.0291	0.0659	0.2646	0.4465	0.1485	0.166	0.0345	0.0572	0.035	0.1569	0.7194
	2283		Phosphatidylinositol (PI)	1-palmitoyl-2-oleoyl-GPI (16:0/18:1)*	LC/MS pos late	52669		HMDB09783			0.25	1.45	0.54	0.34	1.06	2.01	2.36	0.47	0.77	4.56	1.55	0.91									0.0024	0.0054	0.3414	0.5861	0.335	0.3303	0.0017	0.0086	0.7655	0.4386	0.0768	0.211	0.0527	0.0781	0.0154	0.0339	0.7868	0.6805	0.0004
	2285			1-palmitoyl-2-linoleoyl-GPI (16:0/18:2)	LC/MS pos late	52450		HMDB09784			0.46	0.75	0.76	0.62	0.68	0.81	1.13	0.67	1.27	2.1	1.02	1.23									0.0011	0.0029	0.2718	0.5481	0.1981	0.2416	0.0152	0.0382	0.0852	0.1246	0.4268	0.5623	0.6181	0.4058	0.0312	0.0539	0.3324	0.5028	0.0016
	2287			1-palmitoyl-2-arachidonoyl-GPI (16:0/20:4)*	LC/MS pos late	52467		HMDB09789			0.46	0.89	0.93	0.52	0.83	0.97	1.68	0.57	1.13	2.2	1.1	0.74									0.0034	0.007	0.8706	0.7879	0.8997	0.5641	0.0028	0.012	0.3978	0.3136	0.8892	0.735	0.0363	0.059	0.0062	0.0215	0.775	0.6805	0.0024
	2290			1-stearoyl-2-oleoyl-GPI (18:0/18:1)*	LC/MS pos late	52726					0.33	0.99	0.54	0.43	1.28	1.33	2.1	0.58	1.12	3.39	1.48	0.94									0.0001	0.0007	0.8929	0.7947	0.0148	0.0613	0.0006	0.0041	0.3527	0.2903	0.2804	0.4636	0.0118	0.0242	0.0152	0.0336	0.49	0.5713	2.9397e-05
	2291			1-stearoyl-2-linoleoyl-GPI (18:0/18:2)	LC/MS pos late	52468		HMDB09809			0.36	0.77	0.7	0.55	0.76	0.97	1.48	0.68	1.03	2.2	0.99	1.02									8.9353e-09	5.1811e-07	0.0535	0.2509	0.01	0.0513	2.6835e-05	0.0004	0.0444	0.0845	0.7933	0.7127	0.0073	0.0165	0.0035	0.0169	0.7858	0.6805	1.1925e-06
	2302			1-stearoyl-2-arachidonoyl-GPI (18:0/20:4)	LC/MS pos late	52449		HMDB09815			0.65	0.72	1.02	0.67	0.85	1	1.33	0.94	0.94	1.03	0.94	0.73									0.001	0.0026	0.0114	0.0908	0.8638	0.5556	0.001	0.0059	0.1831	0.1954	0.9054	0.7363	0.02	0.0367	0.4261	0.2591	0.5048	0.5763	0.7842
	2332		Lysophospholipid	1-linoleoyl-GPA (18:2)*	LC/MS neg	52690		HMDB07856			0.69	0.51	0.8	0.8	0.47	0.64	0.54	1	1.5	1.12	0.96	2.06									0.0713	0.0676	0.005	0.0605	0.1954	0.2408	0.3424	0.3076	0.0016	0.0091	0.0625	0.1851	0.0068	0.0157	0.9059	0.4012	0.0909	0.2811	0.5554
	2336			1-arachidonoyl-GPA (20:4)	LC/MS neg	46325					0.6	0.48	0.55	0.9	0.6	0.62	0.56	1.17	1.22	0.98	0.76	2.06									0.0089	0.0142	0.0008	0.0181	0.0035	0.025	0.5996	0.4262	0.015	0.0432	0.0334	0.1307	0.006	0.0143	0.3541	0.2325	0.4225	0.548	0.9234
	2343			1-palmitoyl-GPC (16:0)	LC/MS pos late	33955		HMDB10382	86554		0.58	0.97	0.84	0.77	0.85	0.96	1.22	0.75	1.11	1.84	1.06	1.14									4.6246e-05	0.0003	0.9441	0.8036	0.1818	0.2347	0.0155	0.0387	0.1166	0.1462	0.7783	0.7071	0.0931	0.1168	0.0093	0.0272	0.4281	0.549	5.5108e-06
	2344			2-palmitoyl-GPC (16:0)*	LC/MS neg	35253		HMDB61702	15061532		0.44	0.73	0.81	0.69	0.62	0.85	1.13	0.81	1.1	1.81	0.94	1.29									5.0678e-07	1.1476e-05	0.0225	0.1468	0.0989	0.1688	0.0051	0.0169	0.0008	0.0052	0.2279	0.4179	0.4031	0.3162	0.0755	0.0914	0.4811	0.5664	6.721e-05
	2345			1-palmitoleoyl-GPC (16:1)*	LC/MS pos late	33230		HMDB10383	24779461		0.5	1.04	0.99	0.33	1.07	1.98	2.1	0.63	0.7	1.46	1.39	0.44									0.0063	0.0114	0.7631	0.7723	0.7705	0.5301	0.0001	0.0011	0.9061	0.4799	0.0104	0.0586	0.0022	0.0064	0.058	0.0789	0.1319	0.336	0.1025
	2346			2-palmitoleoyl-GPC (16:1)*	LC/MS neg	47118		HMDB10383			0.33	1.16	0.89	0.27	0.85	2.09	2.26	0.49	0.54	1.86	1.12	0.4									0.0012	0.0032	0.4831	0.6829	0.9465	0.5769	6.807e-05	0.0008	0.5223	0.361	0.0128	0.0652	0.0079	0.0175	0.0124	0.032	0.0364	0.1618	0.0462
	2352			1-stearoyl-GPC (18:0)	LC/MS pos late	33961		HMDB10384	497299		0.51	0.91	0.71	0.71	0.83	0.86	1.16	0.67	1.18	2.1	1.01	1.21									0.0002	0.0007	0.7589	0.7723	0.0729	0.1458	0.0253	0.0546	0.1544	0.172	0.4183	0.5609	0.3361	0.2815	0.0075	0.0242	0.4312	0.549	3.7906e-05
	2354			1-oleoyl-GPC (18:1)	LC/MS pos late	48258		HMDB02815	16081932		0.39	0.99	0.69	0.43	1.19	1.51	2.1	0.66	0.99	2.49	1.5	0.78									0.0003	0.0012	0.9385	0.8033	0.4728	0.4005	0.0007	0.0045	0.9144	0.4822	0.0754	0.2091	0.0031	0.0086	0.0544	0.076	0.9257	0.7187	0.0003
	2357			1-linoleoyl-GPC (18:2)	LC/MS pos late	34419	C04100	HMDB10386	11988421		0.39	0.83	0.6	0.68	1.24	0.9	1.92	0.74	1.15	2.45	1.03	0.94									2.4694e-05	0.0002	0.4253	0.6496	0.1263	0.1913	0.0508	0.0916	0.9899	0.4998	0.6811	0.6595	0.0021	0.0063	0.1115	0.1169	0.609	0.6225	5.7332e-05
	2359			1-linolenoyl-GPC (18:3)*	LC/MS pos late	45951		HMDB10388			0.66	0.81	1.23	0.68	1.12	1.04	2.07	0.88	0.98	1.2	1.03	0.51									0.0119	0.0172	0.4154	0.6457	0.2594	0.2884	0.0485	0.0898	0.5754	0.3759	0.5618	0.6187	0.0001	0.0007	0.5269	0.2983	0.6345	0.6311	0.1829
	2375			1-arachidonoyl-GPC (20:4n6)*	LC/MS pos late	33228	C05208	HMDB10395			0.51	0.7	0.63	0.97	0.89	0.77	1.1	1.07	0.85	1.16	0.65	1.13									0.0095	0.015	0.178	0.446	0.094	0.1662	0.99	0.5635	0.4919	0.349	0.2366	0.4245	0.7379	0.4516	0.8752	0.3932	0.4428	0.5566	0.5497
	2397			1-palmitoyl-GPE (16:0)	LC/MS pos late	35631		HMDB11503	9547069		0.55	0.95	0.66	0.86	0.75	0.73	0.9	0.66	1.12	1.92	0.81	1.41									0.0006	0.0019	0.8467	0.7873	0.0101	0.0513	0.2825	0.2727	0.0739	0.1157	0.0742	0.2086	0.4386	0.3342	0.0099	0.0283	0.5523	0.6043	0.0002
	2404			1-stearoyl-GPE (18:0)	LC/MS pos late	42398		HMDB11130	9547068		0.46	0.79	0.71	0.79	0.76	0.81	1.16	0.81	1.24	2.11	1	1.47									6.6636e-06	6.5204e-05	0.1658	0.4276	0.0233	0.0812	0.0719	0.1102	0.0592	0.0998	0.1908	0.3686	0.3074	0.2656	0.0846	0.0984	0.1871	0.3914	8.1796e-06
	2405			2-stearoyl-GPE (18:0)*	LC/MS neg	41220		HMDB11129			0.5	0.96	0.69	0.79	0.72	0.85	0.99	0.69	1.2	2.29	1.01	1.6									2.8078e-05	0.0002	0.9572	0.805	0.0184	0.0724	0.0831	0.1234	0.0266	0.0633	0.3903	0.5335	0.9429	0.5192	0.0138	0.033	0.3191	0.5	1.7315e-06
	2406			1-oleoyl-GPE (18:1)	LC/MS pos late	35628		HMDB11506	9547071		0.31	0.91	0.83	0.33	0.81	1.51	2.19	0.54	0.89	2.66	1.35	0.66									2.8558e-05	0.0002	0.7879	0.7788	0.643	0.4762	2.764e-05	0.0004	0.2151	0.2144	0.0569	0.1767	0.0036	0.0097	0.0127	0.0321	0.629	0.6291	0.0003
	2408			1-linoleoyl-GPE (18:2)*	LC/MS pos late	36600		HMDB11507	52925130		0.36	0.85	0.85	0.4	0.76	1.08	1.83	0.51	1.3	3.09	1.4	0.86									1.0837e-05	9.0415e-05	0.4868	0.6829	0.4309	0.3802	8.4934e-05	0.0009	0.1302	0.1553	0.6582	0.6545	0.0074	0.0167	0.0021	0.0125	0.2953	0.4781	3.7947e-06
	2420			1-arachidonoyl-GPE (20:4n6)*	LC/MS pos late	35186		HMDB11517	42607465		0.5	0.98	0.66	0.66	1.04	1.13	1.37	0.77	0.98	1.92	1.11	1.07									0.0002	0.0007	0.9304	0.8033	0.0661	0.1378	0.0134	0.0339	0.7118	0.4199	0.3358	0.5013	0.0528	0.0781	0.0933	0.1047	0.764	0.6782	0.0003
	2434			1-palmitoyl-GPS (16:0)*	LC/MS neg	46130			9547100		0.29	0.56	0.7	1.29	0.41	0.89	1	2.03	1.57	3.08	1.39	6.25									0.0025	0.0055	0.3308	0.5801	0.3338	0.3303	0.3275	0.3012	0.0281	0.0652	0.8975	0.7355	1	0.5289	0.0426	0.0655	0.2766	0.4697	0.0018
	2435			1-stearoyl-GPS (18:0)*	LC/MS neg	45966			9547101		0.18	0.47	0.77	2.05	0.23	0.68	1	2.94	0.99	2.66	0.68	7.81									0.0007	0.0021	0.2899	0.5596	0.5789	0.4523	0.0969	0.1384	0.0032	0.0148	0.9049	0.7363	1	0.5289	0.0119	0.0311	0.6658	0.6398	0.0321
	2436			1-oleoyl-GPS (18:1)	LC/MS neg	19260		HMDB61694	9547099		0.1	0.48	0.2	1.14	0.27	0.92	0.57	2.17	1.84	9.37	1.7	35.78									6.9927e-06	6.5204e-05	0.3267	0.5801	0.001	0.0105	0.6571	0.4527	0.0228	0.0578	0.9995	0.7563	0.5167	0.369	0.1582	0.1419	0.3345	0.5028	7.3286e-06
	2438			1-linoleoyl-GPS (18:2)*	LC/MS neg	43676					2.67	0.78	0.42	1	0.2	0.98	0.03	1.24	1.48	0.43	1.45	16.86									0.0454	0.0472	0.652	0.7397	0.0894	0.1628	0.869	0.5333	0.0136	0.0416	0.9549	0.7484	0.0294	0.0489	0.7316	0.3564	0.458	0.5601	0.0235
	2443			1-stearoyl-GPG (18:0)	LC/MS neg	34437					0.4	1.21	0.9	1.52	0.55	0.57	1.25	0.71	1.12	3.44	0.64	1.96									0.0009	0.0025	0.339	0.5861	0.6271	0.4693	0.1806	0.2113	0.0216	0.0552	0.0546	0.1752	0.4596	0.3475	0.12	0.1208	0.9414	0.7194	4.7435e-05
	2445			1-oleoyl-GPG (18:1)*	LC/MS neg	45968					0.6	1.49	0.7	0.77	1.17	1.4	1.35	0.72	0.77	1.9	1.07	1.01									0.0215	0.0265	0.0248	0.1551	0.0876	0.1606	0.1803	0.2113	0.4939	0.349	0.0567	0.1767	0.1873	0.193	0.09	0.1024	0.096	0.29	0.0045
	2447			1-linoleoyl-GPG (18:2)*	LC/MS neg	54885					0.65	1.03	0.99	0.66	0.82	0.87	1.26	0.56	1.32	2.1	1.15	0.94									0.0061	0.0112	0.8356	0.7873	0.9554	0.5779	0.0086	0.0238	0.1845	0.1963	0.389	0.5331	0.1116	0.1337	0.0005	0.0038	0.0895	0.2811	2.6861e-05
	2448			1-palmitoyl-GPI (16:0)	LC/MS neg	35305		HMDB61695			0.16	0.82	0.94	0.93	0.36	0.81	2.13	0.92	0.61	3.19	0.5	1.38									1.6704e-07	5.2113e-06	0.5696	0.7131	0.113	0.1791	0.7026	0.4716	0.0009	0.0058	0.4929	0.5938	0.184	0.1911	0.6175	0.3265	0.0883	0.2807	0.0001
	2451			1-stearoyl-GPI (18:0)	LC/MS neg	19324		HMDB61696			0.17	0.65	0.98	1.1	0.34	0.72	2.01	1.22	0.52	2.03	0.37	1.23									1.8081e-07	5.2113e-06	0.1414	0.4076	0.3355	0.3303	0.8428	0.5269	0.0005	0.0037	0.2672	0.4483	0.0858	0.1112	0.5669	0.3102	0.0272	0.1342	0.0086
	2453			1-oleoyl-GPI (18:1)	LC/MS neg	36602					0.11	0.58	0.73	0.47	0.59	1.29	3.81	1.04	0.76	3.89	0.98	1.06									1.0935e-09	1.0036e-07	0.0546	0.2521	0.1737	0.2281	0.0036	0.0138	0.033	0.0714	0.2595	0.4445	3.0044e-05	0.0002	0.9965	0.4255	0.2958	0.4781	5.857e-06
	2455			1-linoleoyl-GPI (18:2)*	LC/MS neg	36594					0.16	0.61	1.14	0.46	0.42	1	3.13	0.75	0.7	2.74	0.7	0.66									5.6293e-10	1.0036e-07	0.0209	0.1382	0.9308	0.5754	0.0006	0.004	0.0006	0.0043	0.9288	0.7453	1.9819e-05	0.0002	0.2038	0.1644	0.1572	0.3661	3.0448e-05
	2460			1-arachidonoyl-GPI (20:4)*	LC/MS neg	34214		HMDB61690			0.22	0.59	1.51	0.58	0.47	1	3.29	0.97	0.78	2.15	0.78	0.64									9.8053e-09	5.1811e-07	0.0137	0.1013	0.1032	0.1722	0.0063	0.019	0.0013	0.0075	0.8965	0.7355	1.8201e-06	2.9465e-05	0.8549	0.3904	0.2995	0.4788	0.0003
	2529		Plasmalogen	1-(1-enyl-palmitoyl)-2-oleoyl-GPE (P-16:0/18:1)*	LC/MS pos late	52477		HMDB11342			0.63	1.1	1.04	0.51	1.09	1.61	1.82	0.74	0.9	1.58	1.44	0.64									0.008	0.0131	0.6093	0.7276	0.7395	0.5168	0.0001	0.0011	0.4909	0.349	0.0057	0.0374	0.0005	0.0022	0.0572	0.0789	0.6915	0.6475	0.006
	2530			1-(1-enyl-palmitoyl)-2-linoleoyl-GPE (P-16:0/18:2)*	LC/MS pos late	52677		HMDB11343			0.76	1.07	1.19	0.63	0.65	1.15	1.02	0.68	0.8	1.13	0.91	0.75									0.0434	0.0459	0.5752	0.7134	0.4254	0.3776	0.0527	0.0939	0.0809	0.1216	0.403	0.543	0.276	0.2473	0.0931	0.1047	0.2929	0.4781	0.1194
	2531			1-(1-enyl-palmitoyl)-2-palmitoyl-GPC (P-16:0/16:0)*	LC/MS pos late	52716		HMDB11206	11146967		0.67	1.07	0.89	0.76	1.01	1.19	1.34	0.85	0.99	1.58	1.18	1.01									0.0196	0.0248	0.5619	0.7125	0.4717	0.4003	0.0851	0.1254	0.8027	0.4484	0.2486	0.4358	0.0562	0.0807	0.2437	0.1854	0.8623	0.6912	0.003
	2533			1-(1-enyl-palmitoyl)-2-arachidonoyl-GPE (P-16:0/20:4)*	LC/MS pos late	52673		HMDB11352			1.08	0.98	1.17	0.81	0.91	0.99	0.99	0.82	1.14	1.04	1.13	0.86									0.4372	0.2519	0.9012	0.7986	0.1472	0.2095	0.0534	0.0939	0.4532	0.336	0.9582	0.7484	0.9519	0.5208	0.062	0.0816	0.1675	0.3709	0.6202
	2535			1-(1-enyl-palmitoyl)-2-oleoyl-GPC (P-16:0/18:1)*	LC/MS pos late	52478					0.8	1.55	0.78	1.08	1.32	1.02	1.28	0.72	1.11	2.14	1.13	1.19									0.2723	0.1813	0.0125	0.0958	0.1803	0.2347	0.6986	0.4699	0.0899	0.1284	0.8168	0.7165	0.1443	0.1622	0.0515	0.0731	0.4968	0.5734	9.6959e-05
	2537			1-(1-enyl-stearoyl)-2-oleoyl-GPE (P-18:0/18:1)	LC/MS pos late	52614		HMDB11375			0.41	2.74	1.33	0.31	1.09	2.7	3.58	0.3	0.65	4.38	1.76	0.37									0.0109	0.0163	0.0018	0.0333	0.1348	0.1988	0.0003	0.0022	0.9861	0.4986	0.0024	0.0204	0.0002	0.0009	0.0002	0.0024	0.1999	0.4013	3.6526e-05
	2538			1-(1-enyl-stearoyl)-2-linoleoyl-GPE (P-18:0/18:2)*	LC/MS pos late	52748		HMDB11376			0.67	1.5	1.42	0.54	0.72	1.11	1.53	0.4	0.95	2.13	1.05	0.55									0.0186	0.0238	0.0115	0.0908	0.0208	0.0758	0.0005	0.0037	0.0353	0.0741	0.4585	0.5795	0.0106	0.0222	2.0387e-06	0.0001	0.6555	0.6398	4.6099e-05
	2542			1-(1-enyl-palmitoyl)-2-linoleoyl-GPC (P-16:0/18:2)*	LC/MS pos late	52682		HMDB11211			0.59	1.55	1.69	0.94	0.77	1.16	2.18	0.7	0.92	2.41	1.07	0.78									0.0173	0.0227	0.0599	0.2643	0.0208	0.0758	0.7072	0.4727	0.2975	0.2651	0.5991	0.6263	0.0005	0.0021	0.0815	0.0959	0.9498	0.7207	0.0001
	2546			1-(1-enyl-stearoyl)-2-arachidonoyl-GPE (P-18:0/20:4)*	LC/MS pos late	52475		HMDB05779	9547058		1.17	1.15	1.18	0.86	1.13	0.94	1.13	0.7	1.14	1.12	1.08	0.7									0.1203	0.0977	0.1574	0.4269	0.0813	0.1545	0.1371	0.1774	0.3343	0.2816	0.5704	0.6187	0.2451	0.2305	0.0012	0.0082	0.2039	0.4055	0.2593
	2561		Lysoplasmalogen	1-(1-enyl-palmitoyl)-GPC (P-16:0)*	LC/MS pos late	52474		HMDB10407	10917802		0.15	0.85	0.23	1.28	0.56	0.86	0.86	1.3	0.81	4.63	0.7	7.01									1.8084e-08	7.1665e-07	0.6961	0.7495	1.7342e-06	0.0001	0.2822	0.2727	0.0253	0.0627	0.4957	0.5948	0.4632	0.3496	0.4303	0.2611	0.3563	0.5201	7.8503e-07
	2562			1-(1-enyl-palmitoyl)-GPE (P-16:0)*	LC/MS pos late	39270					0.12	0.84	0.27	1.11	0.52	1.03	1.14	1.38	0.87	5.94	0.9	7.16									1.2662e-09	1.0036e-07	0.5859	0.7208	1.9022e-05	0.0006	0.6061	0.428	0.0082	0.0299	0.937	0.7453	0.5615	0.3884	0.2583	0.1933	0.4986	0.574	3.6732e-08
	2564			1-(1-enyl-oleoyl)-GPE (P-18:1)*	LC/MS pos late	44621					0.18	0.9	0.4	1.19	0.6	1.14	1.36	1.5	0.93	4.71	1.06	5.2									3.0986e-08	1.0915e-06	0.7406	0.7688	0.0009	0.0097	0.453	0.3646	0.0302	0.0678	0.6326	0.6424	0.1999	0.2033	0.1248	0.1236	0.8196	0.6849	1.5194e-07
	2566			1-(1-enyl-stearoyl)-GPE (P-18:0)*	LC/MS pos late	39271					0.38	1.16	0.73	1.09	0.75	0.9	1.43	0.85	1.22	3.68	1.09	2.17									2.0444e-07	5.4013e-06	0.2212	0.4836	0.0417	0.1119	0.868	0.5333	0.0593	0.0998	0.5609	0.6187	0.0176	0.0332	0.1051	0.1128	0.1895	0.3922	1.8126e-10
	2569		Glycerolipid Metabolism	glycerol	LC/MS neg	15122	C00116	HMDB00131	753		0.9	0.89	1.28	0.48	0.61	1.01	0.86	0.55	2.26	2.22	2.29	1.41									0.6303	0.3167	0.406	0.6413	0.2197	0.26	0.0027	0.0118	0.0192	0.0526	0.8512	0.726	0.4714	0.3516	0.0141	0.0333	0.0006	0.0155	0.0015
	2570			glycerol 3-phosphate	LC/MS pos early	43847	C00093	HMDB00126	754		1.58	1.17	1.09	1.67	0.43	0.53	0.29	0.76	1.12	0.83	0.6	2.14									0.6524	0.3252	0.5965	0.726	0.7028	0.4983	0.0665	0.1052	0.0086	0.0307	0.0288	0.1187	0.0073	0.0165	0.3623	0.234	0.564	0.6059	0.5121
	2575			glycerophosphoglycerol	LC/MS polar	48857	C03274		439964		1.09	1.27	1.02	1.62	1.11	1.14	1.04	1.45	1.03	1.19	1.17	1.66									0.7189	0.3416	0.1463	0.4159	0.8232	0.5388	0.039	0.0775	0.643	0.3966	0.2753	0.4577	0.7435	0.4531	0.0856	0.0992	0.7396	0.6685	0.4349
	2576		Monoacylglycerol	1-myristoylglycerol (14:0)	LC/MS neg	35625	C01885	HMDB11561	79050		0.62	1.48	0.77	1.01	1.27	0.93	1.59	0.63	1.27	3.06	1.18	1.22									0.139	0.1107	0.1601	0.4269	0.718	0.5082	0.995	0.5641	0.6526	0.4005	0.878	0.7335	0.1178	0.1394	0.1224	0.1225	0.3989	0.5379	0.0006
	2580			1-palmitoleoylglycerol (16:1)*	LC/MS neg	52431		HMDB11565			0.16	4.07	0.61	0.61	0.37	1.72	1.37	0.26	1.08	26.74	1.86	5.01									0.1331	0.1068	0.0775	0.2925	0.8009	0.5388	0.2517	0.2533	0.4556	0.3366	0.2419	0.4299	0.5985	0.4007	0.0815	0.0959	0.881	0.6977	0.0013
	2583			1-oleoylglycerol (18:1)	LC/MS neg	21184		HMDB11567	5283468		0.14	1	1.04	0.24	0.31	1.17	2.34	0.28	3.38	24.64	3.94	2.97									0.0103	0.0157	0.7517	0.7692	0.8188	0.5388	0.0232	0.0506	0.0836	0.1231	0.8343	0.7183	0.4824	0.3527	0.0728	0.0902	0.043	0.1756	8.0693e-05
	2584			1-linoleoylglycerol (18:2)	LC/MS neg	27447			5283469		0.24	0.72	1.53	0.39	0.22	0.69	1.37	0.37	2.81	8.34	1.92	2.23									0.0171	0.0225	0.3844	0.6266	0.6451	0.4763	0.1181	0.1598	0.006	0.0239	0.3189	0.4915	0.9703	0.5248	0.0921	0.1045	0.0374	0.1625	0.0006
	2585			1-linolenoylglycerol (18:3)	LC/MS neg	34393		HMDB11569	53480978		0.21	1.14	1.33	0.68	0.28	0.72	1.74	0.43	2.01	10.69	1.44	2.63									0.0111	0.0163	0.9815	0.81	0.5869	0.4538	0.5221	0.3944	0.024	0.0603	0.3321	0.501	0.3869	0.309	0.1175	0.1196	0.0908	0.2811	0.0001
	2589			1-dihomo-linolenylglycerol (20:3)	LC/MS neg	48341					0.22	1.17	1.73	0.28	0.28	1.37	2.21	0.33	1.88	9.83	2.58	1.49									0.0013	0.0034	0.5026	0.6847	0.2307	0.2666	0.0016	0.0082	0.0044	0.0195	0.2656	0.4469	0.1043	0.1273	0.0053	0.0192	0.1561	0.3661	3.0654e-06
	2590			1-arachidonylglycerol (20:4)	LC/MS neg	34397	C13857	HMDB11549	5282281		0.42	1.19	1.23	0.48	0.49	1.02	1.45	0.41	1.79	5.11	1.83	1.46									0.0079	0.013	0.6475	0.7397	0.4843	0.4025	0.0158	0.0387	0.031	0.0682	0.6878	0.6641	0.2079	0.2088	0.0138	0.033	0.1155	0.3234	2.5518e-05
	2593			1-docosahexaenoylglycerol (22:6)	LC/MS neg	35153		HMDB11587			0.67	0.88	0.87	0.71	0.86	0.43	1.12	0.35	2.95	3.92	1.28	1.21									0.3265	0.2058	0.697	0.7495	0.6938	0.4973	0.649	0.4486	0.6897	0.412	0.0655	0.1916	0.8456	0.4875	0.0571	0.0789	0.0343	0.1557	0.0083
	2598			2-oleoylglycerol (18:1)	LC/MS neg	21232		HMDB11537	5319879		0.11	1.01	0.84	0.22	0.36	1.27	2.77	0.27	3.34	31.07	4.25	3.05									0.006	0.0111	0.703	0.7519	0.65	0.4782	0.0221	0.0487	0.2049	0.2075	0.7552	0.695	0.2433	0.2299	0.0975	0.108	0.0392	0.165	4.6615e-05
	2599			2-linoleoylglycerol (18:2)	LC/MS neg	32506		HMDB11538	5365676		0.36	0.89	1.3	0.36	0.32	0.7	1.14	0.28	3.44	8.47	2.4	2.12									0.1215	0.0983	0.5701	0.7131	0.8081	0.5388	0.1521	0.1877	0.0746	0.1163	0.3401	0.5035	0.9941	0.5289	0.0719	0.0899	0.025	0.1322	0.002
	2600			2-arachidonoylglycerol (20:4)	LC/MS neg	19266	C13856	HMDB04666	5282280		1.11	1.62	1.07	0.57	1.4	1.25	1.36	0.44	2.58	3.76	3.22	1.23									0.8564	0.3857	0.181	0.4462	0.8225	0.5388	0.1442	0.1839	0.5009	0.3519	0.4627	0.5834	0.474	0.3516	0.0418	0.0654	0.047	0.1811	0.0027
	2611			1-dihomo-linoleoylglycerol (20:2)	LC/MS neg	35103					0.42	0.92	1.03	0.38	0.57	0.78	1.4	0.32	4.32	9.53	3.38	2.19									0.0322	0.0364	0.8617	0.7879	0.7027	0.4983	0.0572	0.0982	0.1312	0.1553	0.6803	0.6595	0.7625	0.4595	0.0341	0.0569	0.0109	0.0787	3.8961e-05
	2631		Diacylglycerol	palmitoyl-oleoyl-glycerol (16:0/18:1) [1]*	LC/MS pos late	54943	C13861	HMDB07102			0.26	1.81	0.8	1.13	0.32	0.61	1	0.38	0.68	4.82	0.42	1.84									0.0165	0.022	0.0507	0.2413	0.6956	0.4973	0.8413	0.5268	0.0403	0.0787	0.81	0.7165	1	0.5289	0.0465	0.0685	0.1673	0.3709	0.0035
	2632			palmitoyl-oleoyl-glycerol (16:0/18:1) [2]*	LC/MS pos late	54942	C13861	HMDB07102			0.14	1.56	0.37	0.95	0.39	0.76	1	0.46	0.83	8.97	0.63	4.14									0.0023	0.0052	0.2999	0.5647	0.1575	0.2149	0.5226	0.3944	0.0721	0.1145	0.7913	0.7127	0.9987	0.5289	0.0579	0.0789	0.8098	0.6837	0.0002
	2633			palmitoyl-linoleoyl-glycerol (16:0/18:2) [1]*	LC/MS pos late	52633		HMDB07103	9543695		0.27	0.92	0.65	1.15	0.3	0.38	0.73	0.48	1.29	4.39	0.49	2.88									8.964e-05	0.0005	0.694	0.7495	0.1377	0.201	0.585	0.4211	0.0001	0.0011	0.001	0.0108	0.1498	0.166	0.0112	0.0303	0.309	0.4897	1.4183e-05
	2634			palmitoyl-linoleoyl-glycerol (16:0/18:2) [2]*	LC/MS pos late	52634		HMDB07103			0.28	0.85	0.56	1.04	0.31	0.42	0.6	0.51	1.25	3.73	0.52	3.17									0.0002	0.0007	0.4796	0.6829	0.0507	0.1205	0.935	0.5499	0.0001	0.0013	0.0021	0.0193	0.0437	0.0693	0.0161	0.0347	0.296	0.4781	6.3375e-05
	2640			palmitoyl-arachidonoyl-glycerol (16:0/20:4) [1]*	LC/MS pos late	54957		HMDB07112			0.35	1	1.01	0.94	0.47	0.63	1.34	0.59	0.89	2.52	0.56	1.12									0.0003	0.0011	0.8866	0.7935	0.7803	0.5323	0.705	0.472	0.006	0.0239	0.0428	0.1554	0.4138	0.3209	0.0252	0.0477	0.8735	0.6942	0.0007
	2641			palmitoyl-arachidonoyl-glycerol (16:0/20:4) [2]*	LC/MS pos late	54958		HMDB07112			0.31	1.01	0.79	0.6	0.46	0.52	1.19	0.31	1.13	3.69	0.59	0.97									0.0034	0.007	0.9045	0.799	0.2686	0.2925	0.0417	0.0812	0.0402	0.0787	0.06	0.1811	0.9224	0.5135	0.0004	0.0034	0.4749	0.5664	0.0007
	2646			stearoyl-linoleoyl-glycerol (18:0/18:2) [1]*	LC/MS pos late	54948					0.51	0.79	0.44	5.63	0.57	0.21	0.49	1.51	1.43	2.22	0.3	6.84									0.1605	0.1244	0.356	0.599	0.1018	0.1714	0.0009	0.0056	0.1868	0.1976	0.0003	0.0052	0.1201	0.1414	0.5717	0.3112	0.1675	0.3709	0.0648
	2647			stearoyl-linoleoyl-glycerol (18:0/18:2) [2]*	LC/MS pos late	54947					0.43	0.76	0.34	2.1	0.52	0.37	0.41	1.03	1.23	2.15	0.46	5.41									0.0186	0.0238	0.3301	0.5801	0.0037	0.0259	0.0406	0.0805	0.0146	0.0429	0.0037	0.0273	0.0028	0.008	0.9918	0.4244	0.4663	0.5603	0.0329
	2649			oleoyl-oleoyl-glycerol (18:1/18:1) [1]*	LC/MS pos late	54945		HMDB07218			0.15	1.02	0.27	0.39	0.99	1.11	1.73	0.42	0.7	4.67	0.77	1.14									0.0076	0.013	0.8638	0.7879	0.0983	0.1686	0.0418	0.0812	0.6625	0.4047	0.6591	0.6545	0.4864	0.3547	0.0738	0.0904	0.7972	0.6834	0.0095
	2650			oleoyl-oleoyl-glycerol (18:1/18:1) [2]*	LC/MS pos late	54946		HMDB07218			0.29	1.03	0.25	0.41	1.2	1.69	1.03	0.68	0.65	2.29	1.11	1.51									0.0297	0.034	0.9152	0.8004	0.0404	0.1103	0.0409	0.0806	0.7424	0.4326	0.2325	0.4197	0.8488	0.4877	0.3149	0.2198	0.6147	0.6225	0.07
	2652			oleoyl-linoleoyl-glycerol (18:1/18:2) [1]	LC/MS pos late	46798		HMDB07219			0.44	0.66	0.67	0.82	0.56	0.44	0.86	0.55	1.22	1.84	0.54	1.17									1.6304e-08	7.1665e-07	0.0008	0.0181	0.0011	0.0116	0.0793	0.1184	1.1438e-05	0.0002	3.0898e-08	8.7861e-06	0.2093	0.2092	6.7497e-06	0.0002	0.0808	0.265	3.552e-06
	2653			oleoyl-linoleoyl-glycerol (18:1/18:2) [2]	LC/MS pos late	46799		HMDB07219			0.47	0.65	0.68	0.8	0.55	0.44	0.79	0.54	1.25	1.74	0.55	1.19									5.2472e-06	5.3663e-05	0.004	0.0539	0.0072	0.0426	0.1122	0.1545	0.0001	0.0013	1.306e-06	8.2523e-05	0.0865	0.1114	9.1546e-05	0.0015	0.09	0.2811	0.0003
	2657			linoleoyl-linoleoyl-glycerol (18:2/18:2) [1]*	LC/MS pos late	54968		HMDB07248			0.27	0.67	0.63	0.92	0.35	0.37	0.82	0.5	1.58	3.94	0.58	2.41									1.8262e-06	2.5173e-05	0.0815	0.2925	0.0475	0.1183	0.9678	0.558	6.2533e-05	0.0008	2.563e-05	0.0009	0.4045	0.3164	0.0043	0.0176	0.0414	0.1714	7.0968e-07
	2659			linoleoyl-linolenoyl-glycerol (18:2/18:3) [1]*	LC/MS pos late	54963		HMDB07249			0.32	0.85	0.72	1.68	0.46	0.36	1.04	0.71	1.92	5.08	0.69	3.48									0.0037	0.0074	0.5903	0.7234	0.4105	0.3695	0.0286	0.0605	0.0365	0.0746	0.0008	0.0096	0.9078	0.5074	0.3892	0.2429	0.0556	0.206	6.768e-05
	2660			linoleoyl-linolenoyl-glycerol (18:2/18:3) [2]*	LC/MS pos late	54964		HMDB07250			0.25	0.4	0.65	1.66	0.15	0.25	0.38	1.05	1.64	2.61	0.42	7.1									0.0003	0.0012	0.0136	0.1013	0.3829	0.3548	0.0472	0.0882	1.9946e-06	8.0246e-05	7.6409e-05	0.0019	0.012	0.0243	0.8881	0.3966	0.117	0.3234	0.0051
	2663			stearoyl-arachidonoyl-glycerol (18:0/20:4) [1]*	LC/MS pos late	57450					0.41	0.91	0.71	1	0.83	1	1.45	1.1	0.88	1.97	0.88	1.49									4.1826e-06	4.7358e-05	0.5441	0.7033	0.0369	0.1056	0.7498	0.4927	0.3332	0.2816	0.8818	0.7335	0.0237	0.041	0.6619	0.3366	0.4598	0.5601	0.0002
	2664			stearoyl-arachidonoyl-glycerol (18:0/20:4) [2]*	LC/MS pos late	57449					0.41	0.62	0.71	1.38	0.64	0.56	1.1	1.25	0.89	1.35	0.5	1.54									0.008	0.0131	0.0676	0.2768	0.4824	0.4024	0.2627	0.2596	0.078	0.1187	0.0429	0.1554	0.7671	0.4609	0.3628	0.234	0.7564	0.6751	0.5359
	2665			oleoyl-arachidonoyl-glycerol (18:1/20:4) [1]*	LC/MS pos late	54960		HMDB07228			0.44	0.74	1.17	0.44	0.72	0.81	1.9	0.48	0.92	1.54	0.74	0.39									8.6844e-05	0.0005	0.0919	0.3171	0.622	0.4678	3.7525e-05	0.0005	0.0863	0.1256	0.1722	0.3486	0.003	0.0083	0.0001	0.0015	0.7862	0.6805	0.0186
	2666			oleoyl-arachidonoyl-glycerol (18:1/20:4) [2]*	LC/MS pos late	54961		HMDB07228			0.43	0.7	1.13	0.4	0.66	0.81	1.72	0.47	0.87	1.41	0.71	0.38									0.0002	0.0007	0.0624	0.2694	0.6919	0.4973	2.0531e-05	0.0004	0.0406	0.0788	0.2128	0.3969	0.0153	0.0295	0.0001	0.0019	0.6318	0.6305	0.0688
	2667			linoleoyl-arachidonoyl-glycerol (18:2/20:4) [1]*	LC/MS pos late	54955		HMDB07257			0.51	0.45	1.13	0.64	0.71	0.37	1.57	0.53	1.28	1.11	0.48	0.38									0.0164	0.022	0.0049	0.0605	0.5276	0.4249	0.0813	0.121	0.0571	0.0978	0.0008	0.0096	0.2402	0.2292	0.0186	0.0374	0.3338	0.5028	0.6285
	2668			linoleoyl-arachidonoyl-glycerol (18:2/20:4) [2]*	LC/MS pos late	54956		HMDB07257			0.55	0.36	1.53	0.57	0.45	0.4	1.25	0.63	1.23	0.81	0.49	0.4									0.0215	0.0265	0.0004	0.0133	0.0626	0.1349	0.0244	0.053	0.001	0.0063	0.0014	0.0145	0.4667	0.3509	0.0631	0.0821	0.4281	0.549	0.4875
	2671			linoleoyl-docosahexaenoyl-glycerol (18:2/22:6) [1]*	LC/MS pos late	54949					0.62	0.48	0.62	2.08	0.93	0.15	0.93	0.67	1.8	1.38	0.28	1									0.3236	0.2052	0.0372	0.2133	0.1009	0.171	0.0338	0.0689	0.8112	0.4498	3.3354e-06	0.0002	0.3607	0.2929	0.2309	0.1783	0.0568	0.2079	0.4271
	2672			linoleoyl-docosahexaenoyl-glycerol (18:2/22:6) [2]*	LC/MS pos late	54950		HMDB07266			0.46	0.15	1.15	0.9	0.32	0.14	0.79	0.84	1.49	0.48	0.21	0.51									0.1942	0.1419	0.0002	0.0087	0.4749	0.4007	0.9169	0.5453	0.0101	0.0338	0.0003	0.005	0.4971	0.359	0.8495	0.3896	0.4519	0.5601	0.0471
	2723		Sphingolipid Synthesis	sphinganine	LC/MS pos late	17769	C00836	HMDB00269	3126		0.54	1.23	0.9	1.14	0.76	1.2	1.25	1.11	2.73	6.17	3.28	5.52									0.0194	0.0247	0.3788	0.6235	0.6804	0.4918	0.9225	0.5467	0.1704	0.1865	0.3641	0.5243	0.5241	0.3729	0.9004	0.3998	0.0005	0.0152	3.461e-08
	2724			sphinganine-1-phosphate	LC/MS pos late	52605		HMDB01383	520		0.3	1.27	0.29	1.53	1	0.98	0.94	1.18	1.78	7.42	1.75	9.38									1.4406e-05	0.0001	0.3335	0.5801	1.5924e-05	0.0006	0.1715	0.205	0.9699	0.4964	0.6071	0.6324	0.9972	0.5289	0.3562	0.2329	0.0828	0.2694	5.3865e-09
	2729		Dihydroceramides	N-palmitoyl-sphinganine (d18:0/16:0)	LC/MS pos late	52604		HMDB11760	5283572		0.5	0.71	0.71	0.85	0.87	1.3	1.24	1.55	0.98	1.39	1.28	1.74									0.0027	0.0059	0.2644	0.541	0.7228	0.5108	0.3669	0.32	0.2727	0.2465	0.4272	0.5623	0.085	0.1112	0.313	0.219	0.9909	0.727	0.0413
	2737		Ceramides	N-palmitoyl-sphingosine (d18:1/16:0)	LC/MS pos late	44877		HMDB04949	5283564		1.03	0.76	1.28	0.87	0.55	0.97	0.69	1.11	1.05	0.78	1.02	1.26									0.0717	0.0677	0.316	0.5776	0.4773	0.4012	0.4954	0.3835	0.0553	0.0961	0.9352	0.7453	0.5576	0.3881	0.8065	0.3775	0.7845	0.6805	0.2712
	2741			N-stearoyl-sphingosine (d18:1/18:0)*	LC/MS pos late	54979		HMDB04950	5283565		1.03	0.74	1.51	0.7	0.81	1.33	1.18	1.26	0.84	0.6	1.12	0.64									0.5263	0.2828	0.2835	0.5543	0.1447	0.2071	0.1817	0.2114	0.5053	0.3522	0.3004	0.4799	0.1535	0.1691	0.4422	0.2647	0.6426	0.6342	0.3651
	2745			N-tetracosadienoyl-sphingosine (d18:1/24:2)*	LC/MS pos late	57441					1.57	0.93	1.2	0.71	0.85	0.98	0.65	0.75	1.05	0.62	1.03	0.72									0.2522	0.1719	0.7415	0.7688	0.3921	0.3596	0.1215	0.1617	0.4657	0.3415	0.8718	0.7334	0.3075	0.2656	0.1651	0.1449	0.7219	0.659	0.2628
	2764			ceramide (d18:1/17:0, d17:1/18:0)*	LC/MS pos late	57434					1.05	0.56	1.23	0.85	0.46	0.43	0.54	0.65	1.46	0.78	0.62	0.95									0.1106	0.0927	0.0938	0.3181	0.6574	0.4816	0.4323	0.356	0.0294	0.0663	0.0288	0.1187	0.8497	0.4877	0.184	0.1562	0.3281	0.5028	0.3711
	2766			ceramide (d18:1/20:0, d16:1/22:0, d20:1/18:0)*	LC/MS pos late	57440					0.82	0.62	3.67	0.42	0.13	1.43	0.59	0.97	0.58	0.44	0.83	0.72									0.4514	0.2578	0.2963	0.5647	0.1118	0.1785	0.2153	0.2297	0.001	0.0062	0.9676	0.7497	0.23	0.2226	0.8727	0.393	0.2458	0.4484	0.1482
	2772		Hexosylceramides (HCER)	glycosyl-N-palmitoyl-sphingosine (d18:1/16:0)	LC/MS pos late	53013					0.97	1.34	1.21	1.38	0.93	1.23	1.15	1.27	0.83	1.14	1.02	1.27									0.7728	0.3603	0.0603	0.2643	0.2721	0.2925	0.0422	0.0817	0.6732	0.4072	0.2605	0.4446	0.333	0.28	0.1983	0.1624	0.1955	0.3961	0.3661
	2773			glycosyl-N-stearoyl-sphingosine (d18:1/18:0)	LC/MS pos late	52234					0.91	1.1	1.02	1.74	0.96	1.28	1.09	2.03	0.75	0.91	0.96	1.7									0.6545	0.3257	0.5387	0.7021	0.877	0.5592	0.0079	0.0222	0.8087	0.4491	0.4314	0.5649	0.7185	0.4458	0.005	0.0186	0.1171	0.3234	0.5948
	2779			glycosyl-N-(2-hydroxynervonoyl)-sphingosine (d18:1/24:1(2OH))*	LC/MS pos late	57444					0.74	0.8	1.36	0.59	1.2	2.2	2.21	1.63	0.85	0.91	1.86	0.67									0.1139	0.0943	0.2152	0.4821	0.0741	0.1473	0.0063	0.019	0.2307	0.2258	0.0002	0.0031	4.8265e-05	0.0003	0.013	0.0321	0.3768	0.534	0.5963
	2797			glycosyl ceramide (d18:2/24:1, d18:1/24:2)*	LC/MS pos late	57453					1.81	1.64	1.21	2.46	0.91	1.21	0.61	1.81	1.04	0.94	1.25	2.79									0.0167	0.0222	0.0579	0.2643	0.5257	0.4242	0.0005	0.0037	0.8536	0.4625	0.7224	0.6779	0.0467	0.0722	0.0309	0.0539	0.8416	0.6857	0.7241
	2802		Lactosylceramides (LCER)	lactosyl-N-palmitoyl-sphingosine (d18:1/16:0)	LC/MS pos late	53010					0.69	0.89	0.8	0.85	0.99	0.89	1.14	0.85	0.86	1.1	0.77	0.82									0.0104	0.0159	0.4955	0.6829	0.1345	0.1988	0.1507	0.1865	0.798	0.4483	0.5014	0.5958	0.3606	0.2929	0.1532	0.1398	0.2039	0.4055	0.4679
	2813		Dihydrosphingomyelins	myristoyl dihydrosphingomyelin (d18:0/14:0)*	LC/MS pos late	57365		HMDB12085			0.46	1.02	0.95	0.81	1.1	1.03	2.28	0.82	0.99	2.2	1.02	0.79									0.0089	0.0142	0.7463	0.7688	0.9484	0.5769	0.1985	0.2233	0.8554	0.4625	0.8635	0.7308	0.0047	0.012	0.2546	0.191	0.9782	0.7221	0.0207
	2814			palmitoyl dihydrosphingomyelin (d18:0/16:0)*	LC/MS pos late	52434			9939965		0.8	1.06	0.99	0.84	1.26	1.51	1.55	1.2	0.92	1.21	1.39	0.94									0.2017	0.1463	0.6994	0.7507	0.8237	0.5388	0.2443	0.2506	0.2624	0.24	0.0193	0.0897	0.0118	0.0242	0.3805	0.2393	0.5132	0.5798	0.3098
	2815			behenoyl dihydrosphingomyelin (d18:0/22:0)*	LC/MS pos late	57331		HMDB12091			1.08	1.09	1.1	0.57	1.34	1.97	1.37	1.04	0.97	0.98	1.91	0.74									0.9144	0.4008	0.7865	0.7788	0.369	0.3484	0.0906	0.1316	0.6685	0.406	0.0258	0.1118	0.2258	0.2199	0.7509	0.3625	0.6866	0.6467	0.81
	2816			sphingomyelin (d18:0/18:0, d19:0/17:0)*	LC/MS pos late	57473		HMDB12087			1.17	0.97	1.1	0.95	1.17	1.57	1.1	1.54	0.87	0.72	1.36	1.01									0.3946	0.2361	0.9858	0.8113	0.5105	0.4196	0.8846	0.5333	0.4991	0.3514	0.0399	0.1504	0.6301	0.4109	0.0526	0.0744	0.4547	0.5601	0.1113
	2818		Sphingomyelins	palmitoyl sphingomyelin (d18:1/16:0)	LC/MS pos late	37506			9939941		0.92	0.92	1	0.92	1.07	1.03	1.16	1.04	1.03	1.02	1.06	0.91									0.3237	0.2052	0.3848	0.6266	0.9866	0.5898	0.3266	0.3012	0.4196	0.3254	0.6687	0.6571	0.0755	0.1028	0.7534	0.3628	0.8682	0.692	0.7748
	2819			hydroxypalmitoyl sphingomyelin (d18:1/16:0(OH))**	LC/MS pos late	62851					0.53	0.68	0.9	0.52	0.88	1.12	1.49	0.86	1.04	1.33	1.16	0.78									0.0028	0.006	0.0707	0.2844	0.5138	0.4201	0.001	0.0058	0.6148	0.3872	0.5405	0.6145	0.0463	0.072	0.2624	0.1954	0.7771	0.6805	0.1072
	2820			stearoyl sphingomyelin (d18:1/18:0)	LC/MS pos late	19503	C00550	HMDB01348	6453725		1.15	0.88	0.88	1.3	1.29	0.97	0.98	1.43	1.05	0.8	1.02	1.17									0.3124	0.2017	0.389	0.6285	0.4501	0.3899	0.0452	0.0856	0.0951	0.1322	0.8794	0.7335	0.9437	0.5192	0.0085	0.0258	0.8201	0.6849	0.1046
	2821			behenoyl sphingomyelin (d18:1/22:0)*	LC/MS pos late	48492		HMDB12103			0.85	1	0.99	0.8	1.1	1.2	1.29	0.95	0.95	1.13	1.14	0.84									0.1806	0.1344	0.8027	0.781	0.9489	0.5769	0.0579	0.0982	0.4251	0.3259	0.0822	0.2195	0.0321	0.0527	0.6741	0.3409	0.5748	0.6127	0.2999
	2822			tricosanoyl sphingomyelin (d18:1/23:0)*	LC/MS pos late	52436		HMDB12105			0.78	0.88	1.02	0.69	0.97	1.03	1.27	0.82	0.99	1.12	1.03	0.72									0.0716	0.0677	0.5538	0.7083	0.7441	0.5176	0.0066	0.0197	0.7724	0.4399	0.4897	0.5938	0.0663	0.0919	0.118	0.1196	0.6713	0.6402	0.4089
	2823			lignoceroyl sphingomyelin (d18:1/24:0)	LC/MS pos late	57330					0.77	0.96	1.02	0.66	0.92	1.08	1.22	0.74	0.97	1.2	1.04	0.73									0.0677	0.0646	0.9337	0.8033	0.8036	0.5388	0.0035	0.0134	0.5983	0.3835	0.482	0.5938	0.1172	0.1392	0.0244	0.047	0.7554	0.6751	0.1452
	2824			sphingomyelin (d18:2/18:1)*	LC/MS pos late	57474					1.08	0.74	1.37	0.57	1.24	1.51	1.58	1.16	1.33	0.91	2.01	0.67									0.6668	0.3293	0.2326	0.4958	0.1334	0.1988	0.0025	0.0109	0.3396	0.2833	0.069	0.1982	0.0461	0.072	0.8545	0.3904	0.2004	0.4013	0.7332
	2825			sphingomyelin (d18:2/23:1)*	LC/MS pos late	57482					0.96	0.84	0.65	1.07	1.28	0.91	0.86	1.15	1.31	1.15	1.19	1.54									0.666	0.3293	0.6126	0.7289	0.0508	0.1205	0.8147	0.5159	0.2998	0.266	0.8835	0.7335	0.5928	0.3983	0.5528	0.307	0.4145	0.5449	0.4581
	2828			sphingomyelin (d18:1/14:0, d16:1/16:0)*	LC/MS pos late	42463		HMDB12097	11433862		0.58	0.82	1.04	0.66	1.06	1.07	1.9	0.86	1.07	1.51	1.15	0.68									0.0016	0.0039	0.2472	0.5145	0.7577	0.5254	0.0041	0.0145	0.5585	0.373	0.5642	0.6187	0.0001	0.0008	0.192	0.1585	0.658	0.6398	0.0103
	2830			sphingomyelin (d17:1/16:0, d18:1/15:0, d16:1/17:0)*	LC/MS pos late	52433					0.66	0.81	0.74	0.91	1.08	0.86	1.22	0.96	0.93	1.15	0.8	0.9									0.0111	0.0163	0.2317	0.4958	0.0718	0.1442	0.4344	0.3564	0.6646	0.4053	0.3356	0.5013	0.2123	0.2111	0.5861	0.3168	0.5156	0.5813	0.4182
	2832			sphingomyelin (d18:2/16:0, d18:1/16:1)*	LC/MS pos late	42459					0.56	0.74	1.08	0.52	1.23	1.48	2.37	1.02	1.03	1.38	1.53	0.6									0.0006	0.0019	0.081	0.2925	0.5762	0.451	3.4703e-05	0.0005	0.1	0.1347	0.0062	0.0391	9.0908e-07	2.0088e-05	0.9404	0.4097	0.8066	0.6837	0.0316
	2833			sphingomyelin (d18:1/17:0, d17:1/18:0, d19:1/16:0)	LC/MS pos late	52615					0.77	0.76	0.77	0.92	1.04	0.65	1.04	0.79	1.12	1.1	0.73	0.84									0.0663	0.0639	0.0981	0.3285	0.0771	0.15	0.4416	0.3597	0.7791	0.4417	0.0085	0.0498	0.7232	0.446	0.0693	0.0876	0.6515	0.639	0.5182
	2834			sphingomyelin (d18:1/18:1, d18:2/18:0)	LC/MS pos late	37529		HMDB12101	6443882		1.19	0.94	1.17	0.81	1.48	1.63	1.45	1.41	0.97	0.77	1.58	0.74									0.1173	0.0958	0.6179	0.7306	0.1521	0.213	0.0378	0.0762	0.0011	0.0063	7.3134e-05	0.0019	0.0015	0.005	0.0069	0.0232	0.7688	0.6785	0.0219
	2835			sphingomyelin (d18:1/19:0, d19:1/18:0)*	LC/MS pos late	57475					0.68	0.78	0.92	0.97	0.74	0.85	1.01	1.06	0.88	1.01	0.75	1.06									0.0188	0.024	0.1629	0.4269	0.67	0.4859	0.7419	0.4906	0.0701	0.113	0.3617	0.5223	0.8643	0.4932	0.8653	0.3919	0.332	0.5028	0.9502
	2836			sphingomyelin (d18:1/20:0, d16:1/22:0)*	LC/MS pos late	48490		HMDB12102			0.88	0.98	0.96	1.08	1.08	1.01	1.18	1.12	0.99	1.1	1	1.04									0.3165	0.2025	0.9878	0.8119	0.867	0.556	0.6304	0.4397	0.5972	0.3835	0.8091	0.7165	0.1764	0.1856	0.4619	0.2716	0.8215	0.6849	0.4441
	2837			sphingomyelin (d18:1/20:1, d18:2/20:0)*	LC/MS pos late	48491					0.99	0.71	1.34	0.81	1.23	1.45	1.66	1.66	0.93	0.66	1.35	0.66									0.9221	0.4008	0.2753	0.5502	0.2599	0.2884	0.5159	0.3939	0.636	0.3943	0.2905	0.4738	0.1368	0.1541	0.1364	0.1312	0.8011	0.6834	0.1534
	2838			sphingomyelin (d18:1/20:2, d18:2/20:1, d16:1/22:2)*	LC/MS pos late	57481					1.05	0.89	0.84	1.04	1.14	0.8	0.92	0.94	1	0.85	0.8	0.86									0.9154	0.4008	0.6581	0.7403	0.6327	0.4719	0.9493	0.5544	0.8298	0.4581	0.5413	0.6145	0.7117	0.4453	0.9157	0.4028	0.8227	0.6849	0.4414
	2839			sphingomyelin (d18:1/21:0, d17:1/22:0, d16:1/23:0)*	LC/MS pos late	52495					0.89	0.9	0.99	1.16	1.03	0.95	1.15	1.24	1.03	1.03	0.98	1.11									0.4357	0.2518	0.5889	0.7231	0.9015	0.5641	0.4088	0.3413	0.9306	0.4834	0.8951	0.7355	0.4147	0.3209	0.2203	0.1725	0.9423	0.7194	0.8657
	2841			sphingomyelin (d18:1/22:1, d18:2/22:0, d16:1/24:1)*	LC/MS pos late	48493		HMDB12104			0.98	0.98	1.25	0.78	1.39	1.66	1.76	1.33	1.03	1.02	1.71	0.77									0.9665	0.4139	0.9366	0.8033	0.0701	0.142	0.0777	0.1172	0.0262	0.0633	0.0006	0.0075	0.0002	0.0009	0.0451	0.0674	0.8665	0.6917	0.8961
	2842			sphingomyelin (d18:1/22:2, d18:2/22:1, d16:1/24:2)*	LC/MS pos late	57477					1.29	0.72	0.92	1.41	1.07	0.74	0.76	1.44	1.31	0.73	0.96	1.38									0.1378	0.1101	0.0928	0.3181	0.8016	0.5388	0.0615	0.101	0.8517	0.4625	0.1367	0.2991	0.1224	0.1427	0.0398	0.0635	0.2069	0.4069	0.058
	2843			sphingomyelin (d18:2/23:0, d18:1/23:1, d17:1/24:1)*	LC/MS pos late	52435					0.99	0.93	1.03	0.87	1.51	1.63	1.57	1.52	1.11	1.04	1.8	1.01									0.9928	0.4202	0.6971	0.7495	0.6667	0.4851	0.4016	0.3379	0.0113	0.0361	0.0028	0.0226	0.0037	0.0098	0.0091	0.027	0.5382	0.5953	0.813
	2844			sphingomyelin (d18:1/24:1, d18:2/24:0)*	LC/MS pos late	47153		HMDB12107			0.86	1	1.13	0.65	1.27	1.65	1.67	1.07	0.99	1.16	1.64	0.74									0.3315	0.2077	0.8362	0.7873	0.2928	0.3079	0.0025	0.0109	0.0579	0.0983	0.0004	0.0061	0.0003	0.0015	0.6657	0.3371	0.9959	0.727	0.2391
	2845			sphingomyelin (d18:2/24:1, d18:1/24:2)*	LC/MS pos late	52437					1.07	0.95	0.87	1	1.07	0.82	0.87	0.86	1.3	1.15	1.06	1.14									0.5638	0.2974	0.9693	0.8096	0.3273	0.3303	0.9696	0.558	0.6065	0.3867	0.2359	0.4245	0.298	0.2628	0.236	0.1813	0.1091	0.3106	0.3124
	2849		Ceramide PEs	palmitoyl-sphingosine-phosphoethanolamine (d18:1/16:0)	LC/MS pos late	62984					0.92	0.86	1.06	0.88	1.24	1.29	1.43	1.33	1.09	1.01	1.4	0.94									0.4688	0.2616	0.2286	0.4945	0.5952	0.4562	0.3539	0.314	0.1046	0.137	0.1057	0.2559	0.006	0.0143	0.0598	0.0803	0.4786	0.5664	0.8253
	2874		Sphingosines	sphingosine	LC/MS pos late	17747	C00319	HMDB00252	5353955		0.45	1	0.75	1.02	0.76	1.41	1.27	1.43	2.87	6.43	4.05	7.21									0.0019	0.0045	0.8554	0.7873	0.244	0.2779	0.7646	0.4965	0.3061	0.268	0.1183	0.2758	0.255	0.2376	0.2714	0.1998	0.0006	0.0167	2.3109e-08
	2876			sphingosine 1-phosphate	LC/MS polar	34445	C06124	HMDB00277	5283560		0.28	1.1	0.32	1.49	0.86	0.96	0.99	1.3	1.63	6.35	1.56	8.3									7.3039e-07	1.5437e-05	0.8236	0.7873	4.4221e-06	0.0002	0.0653	0.105	0.6172	0.3873	0.8715	0.7334	0.9083	0.5074	0.074	0.0904	0.0319	0.1502	7.7973e-10
	2877			N-acetylsphingosine	LC/MS neg	17772	C00195	HMDB04950	5497136		1.13	1.2	0.91	0.72	1.42	1.82	1.14	1.09	0.94	0.99	1.71	0.95									0.3924	0.2356	0.2992	0.5647	0.6439	0.4762	0.0572	0.0982	0.06	0.1005	0.0012	0.0121	0.5421	0.383	0.5963	0.3216	0.7936	0.6834	0.9402
	2892		Mevalonate Metabolism	3-hydroxy-3-methylglutarate	LC/MS polar	531	C03761	HMDB00355	1662		1.13	1.47	0.75	1.39	1.79	1.24	1.18	1.18	1.3	1.69	1.62	1.68									0.4864	0.2681	0.1034	0.343	0.1945	0.2405	0.1125	0.1545	0.0077	0.0286	0.334	0.5013	0.421	0.3241	0.3561	0.2329	0.1994	0.4013	0.0292
	2893			mevalonate	LC/MS polar	39583	C02104	HMDB00227	439230		2.31	1.15	1.37	1.68	0.65	1.02	0.38	1.5	0.79	0.39	0.8	1.53									0.0493	0.0503	0.5006	0.6845	0.1837	0.2348	0.0644	0.1039	0.0766	0.118	0.8367	0.7183	0.0172	0.0325	0.1591	0.1423	0.2755	0.4692	0.019
	2894			mevalonolactone	LC/MS pos early	48118		HMDB06024	10428		3.4	1.51	1.3	1.43	0.82	1.71	0.31	1.63	0.69	0.31	1.19	1.6									0.0033	0.0069	0.1597	0.4269	0.3024	0.3142	0.1949	0.2225	0.494	0.349	0.0568	0.1767	0.0082	0.0181	0.072	0.0899	0.2371	0.4394	0.0061
	2906		Sterol	desmosterol	LC/MS pos late	6065	C01802	HMDB02719	439577		0.46	0.82	0.57	0.5	0.93	1.02	1.16	0.62	0.85	1.52	0.87	0.82									0.1063	0.0904	0.6387	0.7397	0.1473	0.2095	0.0301	0.0624	0.7611	0.4374	0.8567	0.7282	0.6321	0.4115	0.1163	0.1196	0.8596	0.6909	0.1814
	2907			cholesterol	LC/MS pos late	63	C00187	HMDB00067	11025495		0.7	0.95	0.98	0.68	1.11	1.35	1.54	0.97	0.86	1.16	1.16	0.73									0.0103	0.0157	0.8214	0.7873	0.9551	0.5779	0.0038	0.0141	0.398	0.3136	0.0213	0.0961	0.0013	0.0043	0.6383	0.33	0.2238	0.425	0.2167
	2918			7-alpha-hydroxy-3-oxo-4-cholestenoate (7-Hoca)	LC/MS neg	36776	C17337	HMDB12458	3081085		0.33	1.15	0.44	0.9	1.01	0.92	1.37	0.73	0.64	2.25	0.6	1.2									0.0002	0.0007	0.6524	0.7397	0.0079	0.0444	0.6696	0.4562	0.7911	0.4471	0.5374	0.6145	0.2573	0.2391	0.1411	0.1341	0.1429	0.3537	0.003
	2932			beta-sitosterol	LC/MS pos late	27414	C01753	HMDB00852	222284		0.3	0.42	0.75	0.27	0.56	1.01	1.41	0.65	0.95	1.33	0.96	0.61									9.4098e-05	0.0005	0.0018	0.0333	0.3107	0.317	6.8469e-05	0.0008	0.0994	0.1345	0.8183	0.7165	0.0923	0.1162	0.1687	0.1472	0.8604	0.6909	0.2228
	2935			campesterol	LC/MS pos late	33997	C01789	HMDB02869	173183		0.35	0.42	0.8	0.28	0.63	1.03	1.44	0.68	0.73	0.88	0.75	0.42									0.0008	0.0024	0.0035	0.0505	0.4507	0.3899	0.0001	0.0011	0.1412	0.1621	0.9914	0.7563	0.1673	0.1803	0.2196	0.1724	0.3366	0.5029	0.6567
	3008		Corticosteroids	corticosterone	LC/MS neg	5983	C02140	HMDB01547	5753		3.06	1.11	3.3	0.92	1.13	0.32	1.21	0.26	1.48	0.54	0.47	0.12									0.0615	0.0606	0.9083	0.799	0.0761	0.1489	0.8396	0.5265	0.5338	0.363	0.1581	0.3329	0.6038	0.4023	0.087	0.1005	0.5033	0.5757	0.2608
	3139		Primary Bile Acid Metabolism	cholate	LC/MS neg	22842	C00695	HMDB00619	221493		0.49	9.24	2.35	11.7	0.16	0.95	0.77	1.2	0.47	8.81	0.44	13.71									0.0674	0.0645	3.2092e-05	0.003	0.2278	0.266	9.7988e-05	0.001	0.0031	0.0146	0.4452	0.5733	0.9381	0.5189	0.7018	0.3488	0.0153	0.0953	0.0002
	3140			glycocholate	LC/MS neg	18476	C01921	HMDB00138	10140		0.64	3.15	1	1.72	0.64	1	0.99	0.55	0.64	3.1	0.64	1.72									0.2089	0.1502	4.9214e-05	0.003	1	0.5902	0.0453	0.0856	0.1876	0.1978	1	0.7563	0.9493	0.5201	0.0139	0.033	0.1876	0.3914	5.9229e-05
	3141			taurocholate	LC/MS neg	18497	C05122	HMDB00036	6675		1.28	1.53	2.48	0.49	0.29	1.49	0.55	0.48	1.08	1.29	1.62	1.12									0.5792	0.3006	0.3572	0.5991	0.028	0.0893	0.4929	0.3823	0.0047	0.0202	0.184	0.3609	0.204	0.207	0.1198	0.1208	0.661	0.6398	0.4202
	3142			chenodeoxycholate	LC/MS neg	1563	C02528	HMDB00518	10133		0.32	3.09	1.84	1.56	0.25	2.26	1.41	1.15	0.41	3.93	0.93	3.2									0.0545	0.0545	0.042	0.2244	0.4059	0.3678	0.3681	0.32	0.0259	0.0633	0.2301	0.4181	0.6191	0.4058	0.9854	0.4236	0.1617	0.3699	0.0115
	3148			taurochenodeoxycholate	LC/MS neg	18494	C05465	HMDB00951	387316		0.9	0.8	1.17	0.41	0.56	0.77	0.73	0.39	1.53	1.36	1.18	0.73									0.6027	0.3077	0.5175	0.6863	0.3032	0.3142	0.0057	0.018	0.0135	0.0416	0.4563	0.5792	0.3046	0.2656	0.0044	0.0176	0.1778	0.3799	0.2207
	3151			tauro-alpha-muricholate	LC/MS neg	42605					1.33	1.81	1.39	0.65	0.69	1.3	0.72	0.47	1.11	1.51	1.45	0.99									0.4964	0.2718	0.114	0.3626	0.4515	0.3899	0.1488	0.1863	0.2427	0.2351	0.5787	0.6197	0.2727	0.2468	0.016	0.0347	0.6364	0.6311	0.167
	3152			tauro-beta-muricholate	LC/MS neg	33983		HMDB00932	168408		0.48	1.54	1.01	0.25	0.1	1.95	0.22	0.31	0.2	0.65	0.4	0.94									0.0293	0.0337	0.7022	0.7519	0.9823	0.5883	0.1702	0.2046	0.0001	0.0013	0.8733	0.7335	0.0472	0.0723	0.1133	0.1185	0.0029	0.0334	0.5835
	3183		Secondary Bile Acid Metabolism	taurolithocholate	LC/MS neg	31889	C02592	HMDB00722	10595		0.17	0.65	1.22	0.11	0.16	0.35	1.12	0.06	1.25	4.68	0.43	0.24									0.0026	0.0057	0.5461	0.7033	0.8041	0.5388	0.0158	0.0387	0.0021	0.0107	0.017	0.0809	0.7486	0.4539	9.5749e-05	0.0015	0.9321	0.7194	0.0099
	3184			taurolithocholate 3-sulfate	LC/MS neg	36850	C03642	HMDB02580	440071		0.24	0.37	1.29	0.17	0.3	0.39	1.61	0.18	1.15	1.75	0.45	0.2									0.0184	0.0238	0.154	0.4269	0.9118	0.5683	0.1168	0.1594	0.0783	0.1187	0.026	0.1118	0.5828	0.3963	0.0183	0.0374	0.9632	0.7207	0.2921
	3198			tauroursodeoxycholate	LC/MS neg	39378		HMDB00874	9848818		0.86	0.55	0.77	0.2	0.79	0.75	0.71	0.27	2.43	1.55	1.83	0.59									0.3082	0.2011	0.0531	0.2509	0.6461	0.4763	0.0003	0.0024	0.2561	0.2372	0.4874	0.5938	0.5631	0.3888	0.0104	0.0293	0.0345	0.1557	0.2254
	3221			taurochenodeoxycholic acid 3-sulfate	LC/MS neg	62890		HMDB02486			0.98	1.08	1.56	0.32	0.45	1.18	0.72	0.35	0.75	0.83	0.88	0.4									0.6281	0.3166	0.8317	0.7873	0.4071	0.368	0.0203	0.0459	0.1045	0.137	0.8703	0.7334	0.7346	0.4502	0.0227	0.0443	0.6881	0.6467	0.8972
	3797	Nucleotide	Purine Metabolism, (Hypo)Xanthine/Inosine containing	inosine	LC/MS neg	1123	C00294	HMDB00195	6021		2.29	0.64	1.53	0.7	0.78	1.62	0.52	1.75	2.76	0.78	4.48	2.6									0.0085	0.0138	0.072	0.2862	0.0699	0.142	0.1987	0.2233	0.289	0.2593	0.0551	0.1752	0.0533	0.0783	0.0162	0.0347	0.0001	0.0047	0.7978
	3798			hypoxanthine	LC/MS neg	3127	C00262	HMDB00157	790		1.01	0.63	1.09	0.78	0.51	0.99	0.55	1.21	2.06	1.3	2.04	2.87									0.8097	0.3732	0.0032	0.0485	0.5379	0.4317	0.071	0.1099	0.0001	0.0012	0.9841	0.7543	0.0003	0.0015	0.1912	0.1585	3.8483e-06	0.0007	0.0402
	3799			xanthine	LC/MS neg	3147	C00385	HMDB00292	1188		0.79	0.85	1	0.79	0.72	1.24	0.91	1.17	1.73	1.87	2.15	2.38									0.1142	0.0943	0.4009	0.641	0.9738	0.5848	0.1494	0.1863	0.0517	0.0924	0.1348	0.2961	0.6701	0.4278	0.3706	0.2363	0.0012	0.0236	0.0001
	3801			xanthosine	LC/MS neg	15136	C01762	HMDB00299	64959		0.36	0.36	0.81	0.74	0.53	1.15	1.21	2.33	3.09	3.17	3.55	6.11									0.0043	0.0083	0.0026	0.0411	0.487	0.404	0.1964	0.2233	0.1305	0.1553	0.3733	0.5262	0.4187	0.3234	0.0076	0.0245	6.8428e-05	0.0036	0.0001
	3804			N1-methylinosine	LC/MS pos early	48351		HMDB02721	65095		0.97	0.8	1.19	0.66	1.33	1.48	1.63	1.22	1.25	1.03	1.84	0.77									0.8401	0.3813	0.0176	0.1227	0.0416	0.1119	2.4801e-05	0.0004	0.002	0.0102	6.0898e-05	0.0016	2.6559e-06	3.6427e-05	0.0357	0.0587	0.0124	0.0809	0.7289
	3805			2'-deoxyinosine	LC/MS neg	15076	C05512	HMDB00071	65058		0.16	0.56	0.34	1.16	0.31	1.31	0.64	2.7	1.81	6.14	2.36	26.03									0.0004	0.0014	0.5462	0.7033	0.0966	0.1675	0.4436	0.3602	0.0164	0.0468	0.6108	0.635	0.7803	0.4656	0.0665	0.0848	0.5745	0.6127	0.0004
	3807			urate	LC/MS neg	1604	C00366	HMDB00289	1175		0.82	0.83	1.03	1.21	0.87	0.62	1.08	0.9	1.18	1.2	0.73	1									0.3781	0.2292	0.3481	0.5909	0.7669	0.5301	0.4837	0.3787	0.5646	0.3738	0.0558	0.1763	0.5458	0.3842	0.7483	0.3619	0.4021	0.5389	0.435
	3809			allantoin	LC/MS polar	1107	C02350	HMDB00462	204		0.48	1.45	0.5	0.99	0.93	0.96	0.98	0.66	0.82	2.47	0.79	1.66									9.0403e-05	0.0005	0.0504	0.2413	0.0003	0.0057	0.9332	0.5499	0.679	0.4095	0.8217	0.7165	0.967	0.5247	0.0254	0.0477	0.2967	0.4781	5.3898e-06
	3810			allantoic acid	LC/MS polar	33434	C00499	HMDB01209	203		0.21	0.66	1.35	0.66	0.34	0.97	2.19	0.96	1.14	3.58	1.1	1.57									1.7699e-06	2.5173e-05	0.0627	0.2694	0.3868	0.3569	0.066	0.1052	0.0002	0.0016	0.86	0.7299	0.0188	0.0351	0.8792	0.3932	0.6767	0.6402	0.0001
	3812			1-methylhypoxanthine	LC/MS pos early	57771		HMDB13141	70765		0.89	0.78	1.42	1.42	0.4	0.34	0.65	0.62	1.37	1.2	0.46	1.14									0.8981	0.396	0.4347	0.6541	0.2395	0.2746	0.319	0.2992	0.0712	0.1138	0.1954	0.3742	0.5941	0.3985	0.279	0.2041	0.8352	0.6854	0.4826
	3815		Purine Metabolism, Adenine containing	adenosine 5'-monophosphate (AMP)	LC/MS pos early	32342	C00020	HMDB00045	6083		6.87	0.61	1.37	1.39	0.43	0.89	0.09	2.02	1.03	0.09	0.92	2.13									0.5799	0.3006	0.3237	0.5794	0.6216	0.4678	0.5139	0.3939	0.0953	0.1322	0.8252	0.7165	0.0846	0.1111	0.1597	0.1423	0.9647	0.7207	0.1181
	3839			N6-carbamoylthreonyladenosine	LC/MS neg	35157		HMDB41623	161466		1.07	0.91	1.48	0.83	1.53	1.49	2.11	1.36	1.28	1.09	1.91	0.7									0.481	0.2666	0.3317	0.5801	0.0002	0.0043	0.0622	0.1011	9.1717e-05	0.0011	0.0002	0.0035	5.0581e-09	3.3531e-07	0.0026	0.0137	0.0109	0.0787	0.3233
	3844			2'-deoxyadenosine	LC/MS pos early	1553	C00559	HMDB00101	13730		0.28	0.48	0.28	0.52	0.43	2.05	0.42	2.24	1.04	1.75	2.14	9.32									0.0115	0.0167	0.3184	0.5776	0.0345	0.1013	0.526	0.3944	0.1413	0.1621	0.2472	0.4358	0.3078	0.2656	0.1307	0.1286	0.9285	0.7191	0.1246
	3849			N6-succinyladenosine	LC/MS neg	48130		HMDB00912	165243		0.64	0.82	1.27	0.82	0.85	1.54	1.68	1.55	1.07	1.35	1.64	1.24									0.0175	0.0228	0.2832	0.5543	0.1086	0.1771	0.2458	0.2516	0.2653	0.2416	0.0169	0.0809	0.0049	0.0123	0.021	0.041	0.7374	0.6681	0.0893
	3857		Purine Metabolism, Guanine containing	guanosine	LC/MS neg	1573	C00387	HMDB00133	6802		1.6	0.55	1.9	0.94	0.53	1.22	0.63	2.1	1.26	0.43	1.54	1.43									0.6299	0.3167	0.0813	0.2925	0.1236	0.188	0.7999	0.5129	0.0843	0.1237	0.4816	0.5938	0.4974	0.359	0.031	0.0539	0.3927	0.5346	0.1653
	3858			guanine	LC/MS pos early	32352	C00242	HMDB00132	764		1.45	0.54	1.37	0.94	0.12	1.29	0.11	2.26	0.72	0.27	0.93	5.32									0.8633	0.3868	0.3418	0.5861	0.2593	0.2884	0.9394	0.5502	3.5764e-05	0.0006	0.6356	0.643	0.0006	0.0022	0.1383	0.1318	0.4157	0.5451	0.0584
	3861			7-methylguanine	LC/MS pos early	35114	C02242	HMDB00897	11361		0.68	1.01	1.2	0.91	0.81	1.05	1.45	0.96	1.12	1.67	1.18	1.1									6.1359e-05	0.0003	0.911	0.7996	0.044	0.1137	0.3697	0.3206	0.02	0.0539	0.5984	0.6263	0.0002	0.0009	0.6271	0.3277	0.2386	0.4408	1.3508e-06
	3867			N2,N2-dimethylguanosine	LC/MS pos early	35137		HMDB04824	92919		0.97	0.78	1.3	0.68	1.23	1.53	1.65	1.35	1.21	0.97	1.85	0.79									0.8639	0.3868	0.0095	0.0873	0.0053	0.0336	0.0002	0.0017	0.0288	0.0659	5.0109e-05	0.0014	5.2955e-06	6.7944e-05	0.0028	0.0144	0.0342	0.1557	0.7121
	3875			2'-deoxyguanosine	LC/MS neg	1411	C00330	HMDB00085	187790		0.16	0.57	0.32	1.12	0.26	1.3	0.52	2.54	2.04	7.24	2.65	35.56									0.0005	0.0016	0.4833	0.6829	0.0848	0.1568	0.4757	0.3758	0.0033	0.0153	0.6172	0.6383	0.3032	0.265	0.0618	0.0816	0.3488	0.5155	0.0002
	3879		Pyrimidine Metabolism, Orotate containing	N-carbamoylaspartate	LC/MS polar	1594	C00438	HMDB00828	93072		0.33	0.92	0.85	1.09	0.34	0.89	0.88	1.06	1.18	3.32	1.05	4									0.0006	0.0019	0.4972	0.6829	0.7564	0.5253	0.7124	0.4755	0.0009	0.006	0.8454	0.724	0.8779	0.4974	0.3951	0.2435	0.4896	0.5713	0.0006
	3880			dihydroorotate	LC/MS polar	601	C00337	HMDB03349	648		1.52	1.77	1.25	0.31	1.57	1.55	1.29	0.27	1.23	1.42	1.9	0.3									0.4509	0.2578	0.9021	0.7986	0.3342	0.3303	0.464	0.37	0.5544	0.3718	0.6955	0.667	0.4212	0.3241	0.2167	0.1714	0.5946	0.6216	0.9196
	3881			orotate	LC/MS polar	1505	C00295	HMDB00226	967		0.36	1.16	0.76	1.14	0.4	1.1	0.83	1.08	0.43	1.37	0.47	1.78									0.0002	0.0007	0.4528	0.6698	0.4356	0.382	0.4982	0.385	9.6103e-05	0.0011	0.6999	0.6679	0.3481	0.289	0.7555	0.3632	0.0013	0.0239	0.1359
	3883			orotidine	LC/MS polar	35172		HMDB00788	92751		0.94	1.3	1	1.36	0.74	1.03	0.78	1.08	0.89	1.22	0.92	1.69									0.6106	0.3107	0.2027	0.4684	1	0.5902	0.069	0.1073	0.1484	0.1681	0.9994	0.7563	0.3409	0.2843	0.5659	0.3102	0.5571	0.6045	0.2308
	3893		Pyrimidine Metabolism, Uracil containing	uridine	LC/MS neg	606	C00299	HMDB00296	6029		0.86	0.62	1.44	0.71	1.08	1.19	1.8	1.37	2.67	1.91	3.18	1.46									0.9319	0.4025	0.0669	0.2768	0.1707	0.2248	0.2086	0.2271	0.3617	0.2961	0.5263	0.6121	0.0217	0.0386	0.2189	0.1724	0.0001	0.0046	0.0132
	3894			uracil	LC/MS polar	605	C00106	HMDB00300	1174		0.95	0.46	1.66	0.58	0.93	0.74	1.62	0.95	6.01	2.9	4.47	1.7									0.9182	0.4008	0.0115	0.0908	0.1594	0.2163	0.0583	0.0982	0.9497	0.4912	0.3604	0.5223	0.1709	0.1828	0.8345	0.3858	2.8724e-07	0.0002	0.0009
	3895			pseudouridine	LC/MS neg	33442	C02067	HMDB00767	15047		1.02	1.24	1.24	0.9	0.78	1.13	0.95	0.82	0.99	1.2	1.11	1.04									0.9841	0.4177	0.2772	0.5508	0.2841	0.3003	0.5282	0.3953	0.2632	0.2402	0.4871	0.5938	0.945	0.5192	0.3061	0.2171	0.9603	0.7207	0.2646
	3896			5,6-dihydrouridine	LC/MS neg	61833			94312		1.18	1.03	1.24	0.84	0.88	1.03	0.93	0.85	1.01	0.89	1.05	0.81									0.5509	0.2921	0.9523	0.804	0.2801	0.2981	0.3143	0.2954	0.5287	0.3627	0.8207	0.7165	0.8886	0.5013	0.3995	0.2457	0.969	0.7219	0.6182
	3897			2'-O-methyluridine	LC/MS neg	57655			102212		0.86	0.73	1.39	0.53	0.95	1.22	1.54	0.88	1.5	1.27	1.83	0.73									0.1351	0.1082	0.0151	0.1062	0.0204	0.0758	1.4378e-05	0.0003	0.764	0.4384	0.115	0.2724	0.0009	0.0032	0.3637	0.234	0.0026	0.0312	0.0332
	3898			5-methyluridine (ribothymidine)	LC/MS neg	35136		HMDB00884	445408		0.78	0.86	0.98	0.77	1.62	1.63	2.03	1.47	1.04	1.14	1.7	0.83									0.0053	0.0099	0.0496	0.2413	0.884	0.5605	0.0024	0.0108	1.3962e-06	7.5534e-05	9.2228e-07	8.2523e-05	5.1884e-10	1.0318e-07	3.6318e-05	0.0008	0.569	0.6089	0.1357
	3909			2'-deoxyuridine	LC/MS neg	1412	C00526	HMDB00012	13712		1.2	0.95	1.3	1.1	1.15	1.06	1.25	1.24	1.48	1.17	1.57	1.16									0.103	0.089	0.6945	0.7495	0.0381	0.1062	0.5451	0.4023	0.2097	0.2107	0.5213	0.6121	0.087	0.1117	0.1074	0.1138	0.0012	0.0236	0.1524
	3912			3-ureidopropionate	LC/MS pos early	3155	C02642	HMDB00026	111		2.35	0.78	1.36	0.81	1.77	1.09	1.03	1.14	1.83	0.61	1.99	0.67									0.0005	0.0018	0.4994	0.6843	0.0837	0.156	0.3232	0.3008	0.0215	0.0552	0.4228	0.5623	0.7211	0.446	0.6262	0.3277	0.026	0.1322	0.0357
	3913			beta-alanine	LC/MS pos early	55	C00099	HMDB00056	239		1.91	0.95	1.1	0.79	1.7	1.37	0.98	1.15	0.85	0.42	1.17	0.5									0.002	0.0047	0.7491	0.7691	0.4926	0.4078	0.3923	0.3334	0.0101	0.0338	0.1987	0.3758	0.9483	0.5201	0.4481	0.2664	0.4696	0.5619	0.0001
	3914			N-acetyl-beta-alanine	LC/MS neg	37432	C01073		76406		1.06	0.91	1.15	0.74	1.44	1.38	1.57	1.12	1.34	1.15	1.85	0.82									0.6468	0.3234	0.4281	0.6505	0.2794	0.298	0.0215	0.0482	0.0054	0.0229	0.0133	0.067	0.001	0.0035	0.3225	0.222	0.0288	0.1406	0.3134
	3917			3-(3-amino-3-carboxypropyl)uridine*	LC/MS neg	62924			171198		1.34	1	1.35	0.77	1.87	1.7	1.87	1.32	1.42	1.05	2.41	0.74									0.005	0.0096	0.9743	0.81	0.0039	0.0265	0.0174	0.0419	1.0413e-06	6.5724e-05	1.009e-05	0.0005	7.7399e-07	1.8634e-05	0.0112	0.0303	0.0014	0.0244	0.6123
	3924		Pyrimidine Metabolism, Cytidine containing	cytidine	LC/MS pos early	514	C00475	HMDB00089	6175		0.67	0.58	1.25	0.73	0.65	1.1	1.21	1.38	2.03	1.77	2.24	2.02									0.1709	0.1299	0.0475	0.2413	0.3392	0.3304	0.2086	0.2271	0.2581	0.2384	0.674	0.6586	0.2315	0.2235	0.2382	0.1825	0.0021	0.0278	0.0114
	3925			cytosine	LC/MS pos early	573	C00380	HMDB00630	597		0.73	0.93	1.3	2.66	0.59	1.37	1.05	3.94	0.82	1.04	1.13	3.92									0.4378	0.2519	0.7046	0.7523	0.1671	0.2232	0.0005	0.0038	0.0933	0.1319	0.2611	0.4446	0.6415	0.4142	6.8648e-06	0.0002	0.9436	0.7194	0.7421
	3927			5-methylcytidine	LC/MS pos early	22119		HMDB00982	92918		0.94	0.83	1.06	0.67	0.97	1.43	1.1	1.15	1.15	1.02	1.65	1.07									0.6764	0.3308	0.0791	0.2925	0.5303	0.4263	0.0002	0.002	0.905	0.4799	0.001	0.011	0.3566	0.2929	0.2022	0.1639	0.1169	0.3234	0.8283
	3928			N4-acetylcytidine	LC/MS pos early	35130		HMDB05923	107461		1.25	0.86	1.25	0.68	2.43	1.83	2.42	1.43	1.75	1.2	3.2	0.71									0.3435	0.2131	0.6189	0.7306	0.4834	0.4025	0.0526	0.0939	0.0003	0.0021	0.0033	0.0253	0.0005	0.0021	0.1056	0.1128	0.0219	0.1195	0.3509
	3930			5-methylcytosine	LC/MS pos early	21106	C02376	HMDB02894	65040		0.6	5.23	2.74	7.63	0.23	0.86	1.05	1.25	0.44	3.83	0.37	4.57									0.619	0.3135	0.0006	0.0162	0.0836	0.156	0.0003	0.0022	0.0136	0.0416	0.8269	0.7169	0.7473	0.4538	0.6376	0.33	0.1768	0.3799	0.006
	3934			2'-deoxycytidine	LC/MS pos early	15949	C00881	HMDB00014	13711		0.39	0.84	0.83	1.08	0.5	1.25	1.06	1.6	1.6	3.5	2	5.28									0.0014	0.0034	0.795	0.781	0.514	0.4201	0.4553	0.3656	0.014	0.0422	0.4132	0.5556	0.8035	0.4742	0.074	0.0904	0.1235	0.3294	3.2601e-05
	3935			2'-O-methylcytidine	LC/MS pos early	57554			150971		1.21	0.83	1.16	0.59	1.53	1.32	1.48	0.94	1.63	1.12	2.16	0.72									0.0754	0.0694	0.1241	0.3809	0.1856	0.2348	5.0195e-05	0.0006	0.0002	0.002	0.0145	0.0719	0.0009	0.0033	0.6088	0.3242	7.1465e-05	0.0036	0.2623
	3936			5-methyl-2'-deoxycytidine	LC/MS pos early	38159	C03592	HMDB02224	440055		0.87	0.84	0.92	0.98	0.84	1.19	0.89	1.38	1.54	1.48	1.84	2.31									0.5042	0.2737	0.4323	0.6541	0.7439	0.5176	0.6966	0.4693	0.395	0.3136	0.6285	0.6417	0.6093	0.4025	0.1032	0.1112	0.0384	0.1628	0.0497
	3945		Pyrimidine Metabolism, Thymine containing	thymidine	LC/MS neg	2183	C00214	HMDB00273	5789		0.35	0.8	0.72	1.16	0.39	1.17	0.8	1.69	1.99	4.53	2.33	9.62									0.0078	0.013	0.8109	0.7864	0.3306	0.3303	0.324	0.3008	0.0127	0.0401	0.7185	0.6771	0.4349	0.3327	0.118	0.1196	0.0759	0.2547	0.0001
	3948			thymine	LC/MS neg	604	C00178	HMDB00262	1135		0.84	0.57	0.87	0.78	1.53	0.89	1.57	1.22	3.18	2.15	2.83	1.67									0.8329	0.3794	0.1325	0.3948	0.9959	0.5902	0.7331	0.487	0.4828	0.3463	0.7027	0.6694	0.3656	0.2962	0.4213	0.2567	0.0039	0.0403	0.0847
	3951			3-aminoisobutyrate	LC/MS pos early	1566	C05145	HMDB03911	64956		2.1	0.91	1.24	0.45	1.37	1.35	0.81	0.67	0.66	0.29	0.89	0.24									0.044	0.0464	0.6841	0.7491	0.5888	0.4539	0.0719	0.1102	0.2093	0.2107	0.6566	0.6545	0.7895	0.468	0.324	0.222	0.43	0.549	0.0023
	3952		Purine and Pyrimidine Metabolism	methylphosphate	LC/MS pos early	37070		HMDB61711	13130		0.67	0.77	1.2	0.83	0.93	0.88	1.68	0.95	1.35	1.57	1.2	0.89									0.0071	0.0123	0.084	0.2981	0.1998	0.2422	0.1706	0.2046	0.8664	0.4654	0.4525	0.577	0.0003	0.0015	0.7073	0.3494	0.0214	0.1181	0.0013
	3968	Cofactors and Vitamins	Nicotinate and Nicotinamide Metabolism	quinolinate	LC/MS pos early	1899	C03722	HMDB00232	1066		1.03	1.58	1.91	0.88	1.72	2.66	3.17	1.48	0.94	1.43	2.49	0.67									0.7073	0.3387	0.0765	0.2925	0.0224	0.0794	0.4061	0.3398	0.0273	0.0643	0.0003	0.0052	0.0001	0.0008	0.1812	0.1548	0.9508	0.7207	0.1743
	3972			nicotinamide	LC/MS pos early	594	C00153	HMDB01406	936		0.57	0.62	0.69	0.96	0.93	0.94	1.14	1.45	1.64	1.79	1.54	2.28									0.0013	0.0034	0.0058	0.0668	0.0249	0.0856	0.846	0.5274	0.9588	0.4924	0.6377	0.643	0.2711	0.2467	0.029	0.0518	0.0017	0.0275	0.0003
	3975			nicotinamide riboside	LC/MS pos early	33013	C03150	HMDB00855	439924		0.54	1.01	0.85	1.02	1.16	1.6	1.81	1.62	0.75	1.39	1.19	1.24									0.0857	0.0763	0.8486	0.7873	0.4165	0.3728	0.9394	0.5502	0.0941	0.132	0.0345	0.1335	0.0117	0.024	0.0613	0.0816	0.6603	0.6398	0.1378
	3989			trigonelline (N'-methylnicotinate)	LC/MS pos early	32401	C01004	HMDB00875	5570		0.57	0.73	0.68	1.34	0.82	0.75	0.97	1.38	1.47	1.88	1.1	2.67									0.1077	0.0908	0.4481	0.6665	0.4688	0.3987	0.295	0.2812	0.2539	0.2361	0.3405	0.5035	0.8118	0.4777	0.3935	0.2429	0.2621	0.464	0.0509
	4000		Pantothenate and CoA Metabolism	pantoate	LC/MS neg	63061	C00522		439251		1.45	0.94	0.75	1.14	1.95	1.21	1.01	1.46	0.83	0.54	1.01	0.79									0.0625	0.061	0.7657	0.7723	0.3664	0.3482	0.5399	0.4003	0.0048	0.0205	0.3133	0.4869	0.8557	0.4897	0.0607	0.0812	0.3979	0.5379	0.0041
	4001			pantothenate	LC/MS neg	1508	C00864	HMDB00210	6613		1.67	0.92	0.54	1.19	2.37	1.04	0.78	1.35	1.36	0.75	1.42	1.31									0.0015	0.0039	0.4789	0.6829	0.0006	0.0082	0.3007	0.2858	2.0696e-06	8.0246e-05	0.741	0.6886	0.149	0.166	0.0435	0.0662	0.0258	0.1322	0.0752
	4013		Ascorbate and Aldarate Metabolism	ascorbic acid 2-sulfate	LC/MS polar	63590			86484		0.76	0.62	0.47	1.2	2.95	1.2	1.83	2.32	1.15	0.95	1.39	1.2									0.0872	0.0772	0.0594	0.2643	0.0111	0.0531	0.5855	0.4211	0.0002	0.0021	0.5239	0.6121	0.0031	0.0087	0.0035	0.0169	0.4619	0.5601	0.5833
	4014			ascorbic acid 3-sulfate*	LC/MS polar	63687			11425365		0.43	0.73	0.68	0.55	1.51	1.48	2.37	1.11	0.68	1.14	1	0.53									0.0069	0.012	0.1618	0.4269	0.1106	0.1785	0.0296	0.062	0.0453	0.0854	0.1545	0.3279	0.0022	0.0064	0.5444	0.305	0.3709	0.5319	0.587
	4016			2-O-methylascorbic acid	LC/MS polar	63990			99779		0.95	0.89	0.88	1.47	0.91	0.65	0.84	1.06	1.13	1.05	0.73	1.33									0.5774	0.3006	0.4378	0.6572	0.3421	0.3322	0.0121	0.0313	0.4629	0.3411	0.0045	0.0313	0.2609	0.2414	0.6991	0.3488	0.4173	0.5459	0.5535
	4017			threonate	LC/MS polar	27738	C01620	HMDB00943	151152		1.14	0.85	0.82	1.17	1.12	0.85	0.8	1.18	1.24	0.92	1.05	1.35									0.2315	0.162	0.276	0.5502	0.1891	0.2351	0.3585	0.3167	0.3374	0.2832	0.3076	0.4846	0.1222	0.1427	0.3233	0.222	0.1059	0.3067	0.5115
	4020			oxalate (ethanedioate)	LC/MS neg	20694	C00209	HMDB02329	971		0.99	0.99	0.74	1.15	1.02	0.84	0.77	0.98	1	1	0.84	1.27									0.9311	0.4025	0.9739	0.81	0.0271	0.0879	0.2387	0.2497	0.837	0.4608	0.1599	0.3356	0.0517	0.0778	0.8388	0.3858	0.9995	0.727	0.9577
	4021			gulonate*	LC/MS polar	46957	C00257	HMDB03290	152304		0.89	1.51	1.05	1.58	1.54	1.54	1.81	1.61	0.93	1.58	1.44	1.4									0.5902	0.3033	0.0595	0.2643	0.8162	0.5388	0.0495	0.0904	0.0456	0.0855	0.0514	0.1723	0.0229	0.0404	0.0427	0.0655	0.7455	0.6716	0.0375
	4024		Tocopherol Metabolism	alpha-tocopherol	LC/MS pos late	1561	C02477	HMDB01893	14985		0.39	0.58	0.7	0.34	0.93	1.02	1.68	0.61	0.64	0.96	0.65	0.35									2.4321e-06	3.2128e-05	0.0039	0.0538	0.0627	0.1349	1.2819e-06	4.9621e-05	0.7056	0.4175	0.8824	0.7335	0.0018	0.0055	0.0114	0.0304	0.0214	0.1181	0.8468
	4030			alpha-tocotrienol	LC/MS pos late	37502	C14153	HMDB06327	5282347		0.11	0.93	1.21	0.3	0.58	1.58	6.43	0.51	0.59	5.05	0.93	0.4									1.3551e-05	0.0001	0.5651	0.7125	0.5801	0.4524	0.0039	0.0142	0.2454	0.2354	0.2494	0.4358	8.2688e-05	0.0005	0.1836	0.1562	0.2281	0.4272	0.0022
	4032			gamma-CEHC	LC/MS neg	44876		HMDB01931	133098		0.14	0.6	0.69	0.51	0.2	0.59	0.99	0.5	0.31	1.33	0.18	0.67									0.0002	0.0007	0.5141	0.6854	0.3051	0.3142	0.2246	0.2379	0.0019	0.0102	0.4342	0.5663	0.8773	0.4974	0.1801	0.1542	0.0064	0.0555	0.4965
	4046			gamma-tocopherol/beta-tocopherol	LC/MS pos late	52473					0.31	0.81	1.52	0.31	0.84	2.09	4.1	0.79	0.68	1.76	1.41	0.34									8.5348e-05	0.0005	0.1563	0.4269	0.1237	0.188	2.1917e-05	0.0004	0.5049	0.3522	0.0062	0.0391	6.1496e-06	7.6195e-05	0.5634	0.3102	0.1089	0.3106	0.1725
	4068		Hemoglobin and Porphyrin Metabolism	heme	LC/MS pos late	41754	C00032	HMDB03178	26945		2.56	1.79	1.15	0.68	0.44	1.19	0.2	0.45	0.45	0.32	0.54	0.72									0.7208	0.3416	0.6456	0.7397	0.9875	0.5898	0.2062	0.2264	0.2253	0.2216	0.5732	0.6187	0.1237	0.1439	0.2446	0.1857	0.1477	0.3606	0.1772
	4069			bilirubin (Z,Z)	LC/MS pos late	43807	C00486	HMDB00054	5280352		0.65	0.59	1.16	0.31	1.12	1.5	2	0.79	1.26	1.15	1.89	0.45									0.0171	0.0226	0.0078	0.0784	0.2721	0.2925	5.1239e-07	3.1168e-05	0.777	0.4417	0.0731	0.2068	0.0004	0.0019	0.1262	0.1247	0.2426	0.4466	0.3916
	4072			biliverdin	LC/MS neg	2137	C00500	HMDB01008	5353439		0.85	0.87	1.41	0.5	1.65	1.77	2.72	1.02	1.73	1.77	3.08	0.66									0.6781	0.3308	0.4771	0.6829	0.1349	0.1988	0.0092	0.0249	0.0531	0.0936	0.0305	0.1232	0.0004	0.0017	0.8357	0.3858	0.0147	0.0938	0.0296
	4081		Thiamine Metabolism	thiamin (Vitamin B1)	LC/MS pos early	5341	C00378	HMDB00235	1130		0.96	0.38	0.52	0.47	0.45	0.57	0.25	0.7	1.27	0.5	0.72	1.43									0.8954	0.3954	0.0109	0.0908	0.1579	0.2149	0.0278	0.0591	0.0543	0.095	0.1821	0.3608	0.0023	0.0066	0.3407	0.2281	0.3994	0.5379	0.0959
	4089		Vitamin A Metabolism	retinol (Vitamin A)	LC/MS pos late	1806	C00473	HMDB00305	445354		0.69	0.61	0.45	0.7	1.94	0.71	1.27	0.82	1.17	1.03	0.83	0.67									0.0335	0.0375	0.0059	0.0668	5.2475e-05	0.0013	0.0474	0.0882	0.0002	0.002	0.0572	0.1767	0.0973	0.1206	0.2866	0.2078	0.2622	0.464	0.6837
	4091			carotene diol (1)	LC/MS pos late	57635					0.63	0.5	0.93	0.35	0.8	0.89	1.18	0.63	0.94	0.74	0.83	0.39									0.0107	0.0161	3.4618e-05	0.003	0.6578	0.4816	1.2798e-07	1.3624e-05	0.2535	0.2361	0.5245	0.6121	0.2794	0.2497	0.0147	0.0335	0.8035	0.6837	0.0251
	4092			carotene diol (2)	LC/MS pos late	57636					0.72	0.4	1.02	0.29	0.53	0.81	0.75	0.57	0.82	0.46	0.66	0.35									0.0772	0.0707	0.0007	0.0175	0.8999	0.5641	1.5751e-05	0.0003	0.0391	0.0778	0.4662	0.5854	0.8432	0.4868	0.0463	0.0685	0.6201	0.6268	0.0214
	4093			carotene diol (3)	LC/MS pos late	57637					0.52	0.44	0.92	0.29	0.67	0.86	1.18	0.56	0.85	0.72	0.73	0.34									0.011	0.0163	0.0004	0.012	0.7335	0.5142	1.1838e-06	4.9621e-05	0.1487	0.1681	0.5965	0.6263	0.3868	0.309	0.0175	0.0367	0.6133	0.6225	0.0799
	4095			beta-cryptoxanthin	LC/MS pos late	57591		HMDB33844	6384256		0.32	0.31	1.08	0.15	0.5	1.06	1.69	0.5	0.61	0.6	0.65	0.18									0.0029	0.0061	7.2509e-05	0.0037	0.7826	0.5327	1.5301e-06	5.4293e-05	0.0922	0.1308	0.7726	0.7045	0.0859	0.1112	0.3074	0.2174	0.222	0.4244	0.0151
	4096			retinal	LC/MS pos late	40807	C00376	HMDB01358	638015		0.61	0.6	0.61	0.51	1.2	0.74	1.21	0.64	1.39	1.37	1.03	0.72									0.057	0.0565	0.0183	0.126	0.0256	0.0872	0.0029	0.012	0.1794	0.193	0.1837	0.3609	0.3223	0.2725	0.0439	0.0665	0.0465	0.1811	0.1291
	4106		Vitamin B6 Metabolism	pyridoxamine	LC/MS pos early	2150	C00534	HMDB01431	1052		1.05	0.63	0.9	0.85	1.25	0.8	1.08	1.09	1.72	1.03	1.38	1.04									0.8142	0.3741	0.4755	0.6829	0.3993	0.3646	0.8039	0.5139	0.4885	0.349	0.9962	0.7563	0.6988	0.4412	0.637	0.33	0.3919	0.5346	0.9279
	4109			pyridoxal	LC/MS neg	1651	C00250	HMDB01545	1050		1.3	0.78	0.94	1.73	1.41	0.55	1.01	1.23	0.93	0.56	0.51	0.67									0.318	0.2025	0.2039	0.4688	0.5139	0.4201	0.1141	0.1562	0.1084	0.1393	0.0264	0.1118	0.9818	0.5263	0.5573	0.3085	0.9785	0.7221	0.0291
	4110			pyridoxate	LC/MS neg	31555	C00847	HMDB00017	6723		0.68	0.75	1.05	1.23	0.5	0.54	0.78	0.89	0.84	0.93	0.46	1.06									0.4783	0.2657	0.5738	0.7131	0.7677	0.5301	0.4418	0.3597	0.0727	0.1145	0.0921	0.2318	0.4068	0.3173	0.6997	0.3488	0.7946	0.6834	0.9104
	4126	Xenobiotics	Benzoate Metabolism	benzoate	LC/MS neg	15778	C00180	HMDB01870	243		0.62	0.68	0.81	0.74	0.56	1.15	0.72	1.26	0.77	0.84	0.89	1.46									0.2239	0.1577	0.2377	0.5033	0.4492	0.3899	0.1993	0.2233	0.145	0.1649	0.3835	0.532	0.3155	0.2688	0.4435	0.2647	0.5862	0.6176	0.6116
	4146			catechol sulfate	LC/MS neg	35320		HMDB59724	3083879		0.65	1.31	1.53	1.09	0.49	1.1	1.16	0.91	0.62	1.26	0.68	0.99									0.3746	0.228	0.1949	0.4634	0.4563	0.3916	0.8948	0.5381	0.1619	0.1787	0.3376	0.5027	0.8252	0.4813	0.8294	0.3855	0.1473	0.3606	0.4651
	4149			guaiacol sulfate	LC/MS neg	46111		HMDB60013	22473		0.69	0.91	1.9	0.83	0.58	1.26	1.59	1.14	0.58	0.76	0.73	0.55									0.4669	0.2616	0.7449	0.7688	0.183	0.2347	0.665	0.4551	0.4218	0.3254	0.3441	0.5056	0.2085	0.2089	0.8465	0.3888	0.3132	0.4935	0.9686
	4153			4-methylcatechol sulfate	LC/MS neg	46146					0.4	1.64	1.43	1.1	0.6	1.13	2.14	0.76	0.59	2.42	0.66	0.86									0.6774	0.3308	0.1911	0.4622	0.9416	0.5769	0.9698	0.558	0.9825	0.4986	0.2535	0.4382	0.6403	0.4142	0.8938	0.398	0.4564	0.5601	0.3241
	4163			4-acetylphenol sulfate	LC/MS neg	44620			4684006		0.51	1.1	0.84	2.76	0.77	0.38	1.27	0.96	0.6	1.29	0.23	0.97									0.5438	0.2898	0.5147	0.6854	0.4621	0.3951	0.0622	0.1011	0.6602	0.4039	0.1751	0.3518	0.7563	0.4565	0.9104	0.4026	0.636	0.6311	0.4327
	4167			4-ethylphenylsulfate	LC/MS neg	36099	C13637	HMDB62551	20822574		0.43	1.83	0.74	1.36	1.01	0.92	1.74	0.68	0.61	2.56	0.56	1.01									0.7145	0.3406	0.2197	0.4834	0.3687	0.3484	0.3373	0.306	0.3048	0.268	0.9506	0.7484	0.6203	0.4058	0.8309	0.3855	0.6645	0.6398	0.2454
	4168			4-ethylphenol glucuronide	LC/MS neg	52937					0.52	1.11	0.83	1.44	0.65	0.29	1.04	0.37	0.77	1.67	0.22	0.59									0.6942	0.3355	0.4341	0.6541	0.3699	0.3484	0.6192	0.4344	0.9849	0.4986	0.1657	0.3459	0.6249	0.4082	0.0972	0.1079	0.8189	0.6849	0.3452
	4169			4-vinylphenol sulfate	LC/MS neg	36098	C05627	HMDB62775	6426766		0.36	1.84	0.79	1.78	0.86	1.14	1.9	1.1	0.74	3.82	0.84	2.21									0.0371	0.0405	0.1962	0.4634	0.1828	0.2347	0.1706	0.2046	0.9101	0.4814	0.7165	0.6769	0.3604	0.2929	0.6569	0.3358	0.804	0.6837	0.0027
	4181			3-methoxycatechol sulfate (1)	LC/MS neg	48763					0.2	0.18	0.3	1.39	0.73	0.33	1.09	2.54	1.01	0.92	0.34	2.13									0.0722	0.0679	0.0815	0.2925	0.3061	0.3144	0.8084	0.5145	0.5918	0.3823	0.3417	0.5035	0.7833	0.4664	0.2889	0.2089	0.8754	0.6947	0.9226
	4191			p-cresol sulfate	LC/MS neg	36103		HMDB11635	4615423		0.62	2.25	0.45	2.76	0.93	0.88	0.68	1.07	0.48	1.72	0.42	2.74									0.5362	0.2876	0.0244	0.1545	0.1776	0.2326	0.109	0.1521	0.3392	0.2833	0.4861	0.5938	0.3091	0.2662	0.9927	0.4244	0.3567	0.5201	0.4283
	4209			2-(4-hydroxyphenyl)propionate	LC/MS neg	35632	C03080	HMDB41683	102526		0.74	1.06	0.44	0.4	1.4	1.22	0.82	0.46	0.9	1.28	1.1	0.72									0.4858	0.2681	0.8541	0.7873	0.1649	0.2218	0.1545	0.1893	0.5638	0.3738	0.7874	0.7119	0.8951	0.5021	0.3243	0.222	0.8701	0.6926	0.7249
	4210			3-(3-hydroxyphenyl)propionate	LC/MS neg	35635	C11457	HMDB00375	91		0.44	4.88	2.69	0.7	1.15	3.6	7.08	0.52	0.52	5.81	1.86	0.42									0.2595	0.1758	0.1124	0.3612	0.5402	0.4328	0.3127	0.2946	0.9134	0.4822	0.1223	0.2811	0.0697	0.0962	0.2921	0.2103	0.3761	0.534	0.0688
	4211			3-(4-hydroxyphenyl)propionate	LC/MS neg	39587	C01744	HMDB02199	10394		0.4	5.17	1.49	2.8	0.92	1.61	3.42	0.87	0.49	6.28	0.78	1.6									0.1445	0.1137	0.0022	0.0366	0.6589	0.4816	0.0579	0.0982	0.8498	0.4625	0.3716	0.5262	0.0896	0.1146	0.6518	0.3354	0.2718	0.4688	0.0008
	4212			3-phenylpropionate (hydrocinnamate)	LC/MS neg	15749	C05629	HMDB00764	107		0.39	0.68	0.67	1.56	0.33	0.43	0.56	0.99	0.59	1.03	0.25	1.81									0.3247	0.2055	0.8046	0.7816	0.2443	0.2779	0.8571	0.5312	0.2497	0.2361	0.6345	0.643	0.1839	0.1911	0.9612	0.4148	0.1866	0.3914	0.5534
	4253		Food Component/Plant	maltol sulfate	LC/MS neg	48696					0.4	0.7	0.34	1.23	1.79	1.03	1.53	1.8	1.33	2.34	1.37	2.75									0.0734	0.0682	0.4898	0.6829	0.0144	0.0613	0.6527	0.4504	0.4479	0.3357	0.9593	0.7484	0.9751	0.5256	0.2788	0.2041	0.429	0.549	0.0595
	4256			2-piperidinone	LC/MS pos early	43400		HMDB11749	12665		0.24	0.24	0.81	21.38	0.47	0.2	1.55	18.34	1.14	1.11	0.23	13.04									0.0409	0.0439	0.1727	0.4346	0.5969	0.4566	0.1198	0.1604	0.3211	0.2776	0.1061	0.2559	0.5599	0.3881	0.1929	0.1588	0.6231	0.6273	0.8118
	4302			genistein	LC/MS neg	32448	C06563	HMDB03217	5280961		0.39	1.15	0.5	0.75	0.31	0.5	0.4	0.32	0.57	1.69	0.28	1.36									0.0345	0.0381	0.7634	0.7723	0.3991	0.3646	0.6078	0.4285	0.0496	0.0898	0.108	0.2581	0.497	0.359	0.0188	0.0375	0.9134	0.7134	0.0223
	4303			genistein glucuronide*	LC/MS neg	62063					0.65	1.6	0.71	0.95	0.74	0.65	0.8	0.38	0.92	2.27	0.6	1.08									0.1168	0.0956	0.1604	0.4269	0.5696	0.4467	0.9867	0.5624	0.2662	0.2417	0.12	0.2787	0.9257	0.5135	0.0046	0.0176	0.9998	0.727	0.0046
	4309			1-aminocyclopropanecarboxylic acid	LC/MS pos early	38098	C01234		535		1.41	1.11	0.42	1.21	0.76	0.34	0.23	0.37	0.92	0.73	0.31	1.19									0.0834	0.0745	0.561	0.7125	0.0005	0.0074	0.2952	0.2812	0.1312	0.1553	1.0623e-05	0.0005	3.5711e-08	1.4204e-06	4.2413e-05	0.0008	0.7721	0.6798	0.1456
	4357			2,3-dihydroxyisovalerate	LC/MS polar	38276	C04039	HMDB12141	677		0.53	0.68	3.15	1.05	0.52	1.45	3.07	2.26	1.23	1.57	1.79	1.15									0.002	0.0047	0.0491	0.2413	1.3281e-06	0.0001	0.9409	0.5503	0.0011	0.0065	0.0658	0.1916	2.5929e-06	3.6427e-05	0.0003	0.0029	0.3702	0.5319	0.0334
	4362			2,8-quinolinediol sulfate	LC/MS neg	48691					0.59	1.97	1.15	1.65	0.88	4.31	1.71	3.62	0.17	0.55	0.71	1.17									0.9407	0.4058	0.6321	0.7364	0.9469	0.5769	0.9797	0.5607	0.5631	0.3738	0.0376	0.1437	0.4729	0.3516	0.1067	0.1135	0.0558	0.206	0.1633
	4366			2-oxindole-3-acetate	LC/MS neg	40479		HMDB35514	3080590		0.84	0.99	1.17	0.93	1	0.96	1.39	0.9	1.32	1.57	1.27	1.01									0.7941	0.3675	0.7387	0.7688	0.5521	0.436	0.8722	0.5333	0.5313	0.363	0.8848	0.7335	0.8186	0.4795	0.7267	0.3551	0.628	0.6291	0.2843
	4390			gluconate	LC/MS polar	587	C00257	HMDB00625	10690		1.14	0.88	0.93	0.78	1.34	0.93	1.1	0.82	1.6	1.25	1.49	0.93									0.4065	0.2404	0.5803	0.7182	0.769	0.5301	0.1891	0.2176	0.0898	0.1284	0.6472	0.648	0.5447	0.3842	0.2221	0.1731	0.0093	0.0696	0.1807
	4413			beta-guanidinopropanoate	LC/MS pos early	35101	C03065	HMDB13222	67701		1.23	0.82	1.59	0.9	3.57	3.57	4.6	3.91	0.87	0.58	3.11	0.49									0.2917	0.1923	0.4869	0.6829	0.5498	0.4357	0.3996	0.3374	4.7989e-05	0.0006	0.0001	0.0029	0.0002	0.0009	0.0002	0.0024	0.8231	0.6849	0.054
	4437			cinnamate	LC/MS neg	12115	C00423	HMDB00930	444539		0.5	0.69	0.62	1.4	0.55	0.69	0.68	1.42	0.53	0.72	0.37	1.51									0.2708	0.1813	0.5465	0.7033	0.1675	0.2232	0.7474	0.4927	0.4533	0.336	0.8749	0.7335	0.3011	0.2644	0.4436	0.2647	0.1613	0.3699	0.3629
	4455			daidzein	LC/MS neg	32453	C10208	HMDB03312	5281708		0.49	1.31	0.45	1.19	0.48	0.35	0.44	0.31	0.69	1.85	0.24	1.3									0.0812	0.073	0.5273	0.6947	0.1606	0.2173	0.6751	0.4592	0.2427	0.2351	0.029	0.1187	0.4147	0.3209	0.0176	0.0368	0.9385	0.7194	0.017
	4456			daidzein 7-O-glucuronide	LC/MS neg	62070		HMDB41718	11316354		0.55	1.36	0.54	1.15	0.84	0.55	0.83	0.47	0.82	2.02	0.45	1.14									0.031	0.0353	0.3818	0.6266	0.1062	0.1752	0.7576	0.4955	0.4399	0.3339	0.0548	0.1752	0.8516	0.4881	0.0151	0.0336	0.6755	0.6402	0.0105
	4458			genistein sulfate*	LC/MS neg	62061					0.41	1.45	0.48	1.23	1.24	0.88	1.44	0.75	0.77	2.71	0.67	1.41									0.0002	0.0007	0.2181	0.4821	0.0084	0.0457	0.3806	0.3261	0.6155	0.3872	0.5575	0.6187	0.0646	0.0908	0.3443	0.2286	0.2807	0.4718	0.0001
	4463			dihydroferulate	LC/MS neg	40481			14340		0.34	3.3	1.1	2.76	0.47	1.55	1.51	1.29	0.48	4.68	0.75	3.99									0.0889	0.0785	0.0055	0.0646	0.8728	0.5573	0.0042	0.0146	0.2367	0.231	0.5985	0.6263	0.7011	0.4417	0.5268	0.2983	0.2635	0.464	0.0011
	4464			dihydroferulic acid sulfate	LC/MS neg	62857		HMDB41724	187489		0.45	1.65	0.94	3.11	0.63	1.59	1.31	3.01	0.45	1.65	0.72	3.78									0.2576	0.1748	0.3008	0.5647	0.9303	0.5754	0.0022	0.0105	0.6127	0.3872	0.4232	0.5623	0.5839	0.3963	0.0041	0.0176	0.2576	0.4618	0.3008
	4475			equol glucuronide	LC/MS neg	41948					0.41	1.81	0.5	1.23	0.71	0.42	0.87	0.28	0.54	2.37	0.23	0.77									0.3968	0.2364	0.0957	0.3227	0.1342	0.1988	0.8653	0.5333	0.7608	0.4374	0.9063	0.7363	0.7132	0.4453	0.1058	0.1128	0.254	0.4569	0.167
	4476			equol sulfate	LC/MS neg	40478					0.53	1.64	0.57	1.15	0.92	1.04	0.99	0.73	0.55	1.7	0.58	1.25									0.2052	0.1485	0.0723	0.2862	0.0958	0.1668	0.8856	0.5333	0.8448	0.4625	0.3116	0.4869	0.8232	0.4813	0.4979	0.2856	0.0742	0.252	0.2007
	4477			ergothioneine	LC/MS pos early	37459	C05570	HMDB03045	3032311		1.17	0.63	0.72	0.81	0.85	0.79	0.53	1.01	1.28	0.69	1.01	1.32									0.3333	0.2084	0.0007	0.0175	0.0214	0.0767	0.1182	0.1598	0.2544	0.2361	0.086	0.2233	7.071e-05	0.0005	0.7045	0.3488	0.0719	0.2469	0.007
	4479			erythritol	LC/MS polar	20699	C00503	HMDB02994	222285		0.59	1.38	1.3	1.42	0.62	0.97	1.37	1	0.94	2.19	0.91	1.6									0.0066	0.0116	0.0768	0.2925	0.1177	0.1846	0.054	0.0946	0.0114	0.0361	0.9943	0.7563	0.0766	0.104	0.8703	0.393	0.701	0.6519	0.0001
	4485			ferulic acid 4-sulfate	LC/MS neg	47114		HMDB29200	6305574		0.3	0.57	0.39	0.66	1.41	1.36	1.82	1.57	1.18	2.22	1.6	1.92									0.0077	0.013	0.1701	0.4315	0.0421	0.1119	0.5405	0.4003	0.699	0.4143	0.8486	0.7257	0.272	0.2468	0.3357	0.227	0.5537	0.6043	0.0497
	4488			quinate	LC/MS polar	18335	C00296	HMDB03072	6508		0.29	0.61	0.71	0.91	0.78	0.91	1.91	1.35	1.28	2.66	1.16	1.88									0.0001	0.0006	0.1133	0.3622	0.3909	0.3591	0.4053	0.3397	0.2199	0.218	0.7324	0.6862	0.0317	0.0523	0.663	0.3366	0.4507	0.5601	0.0014
	4505			glycitein	LC/MS pos late	34024	C14536	HMDB05781	5317750		0.31	1.17	0.81	1.1	0.16	0.2	0.42	0.19	0.51	1.9	0.1	0.84									0.1054	0.0901	0.5984	0.726	0.9707	0.5837	0.7946	0.5111	0.041	0.0793	0.0163	0.079	0.6204	0.4058	0.0085	0.0258	0.9599	0.7207	0.0315
	4508			glycitein sulfate (2)	LC/MS neg	62887					0.62	1.27	0.72	1.4	0.82	0.68	0.94	0.74	0.79	1.62	0.54	1.27									0.056	0.0558	0.4205	0.6496	0.4407	0.3858	0.3422	0.3076	0.6095	0.3872	0.3002	0.4799	0.4972	0.359	0.3722	0.2363	0.7096	0.6554	0.0212
	4513			histidine betaine (hercynine)*	LC/MS pos early	62278			3083620		0.58	0.94	0.68	1.37	0.7	0.77	0.83	1.12	0.91	1.48	0.7	2.01									0.0009	0.0025	0.761	0.7723	0.0484	0.1183	0.0988	0.1402	0.0259	0.0633	0.1691	0.3459	0.4798	0.3521	0.5527	0.307	0.4642	0.5603	0.0131
	4516			homostachydrine*	LC/MS pos early	33009	C08283	HMDB33433	441447		0.63	1.03	0.11	1.04	3.91	1.02	0.66	1.02	0.64	1.04	0.65	1.62									0.0056	0.0103	0.7762	0.7749	8.2e-14	1.8095e-11	0.7647	0.4965	1.2328e-08	2.3342e-06	0.9721	0.7521	0.066	0.0918	0.9841	0.4235	0.015	0.0942	0.4966
	4520			indolin-2-one	LC/MS pos early	43374	C12312		321710		0.67	1.92	2.13	1.09	0.21	0.61	0.67	0.35	0.34	0.99	0.21	0.51									0.9834	0.4177	0.3235	0.5794	0.2657	0.2925	0.8696	0.5333	0.0501	0.0903	0.5327	0.6145	0.3842	0.3081	0.1519	0.1389	0.1696	0.3713	0.7052
	4539			mannonate*	LC/MS polar	62864			3246006		0.58	0.74	0.98	1.14	0.93	1.03	1.57	1.58	1.16	1.49	1.2	1.5									5.1486e-05	0.0003	0.0141	0.1021	0.808	0.5388	0.3343	0.3042	0.5619	0.3738	0.8136	0.7165	0.0005	0.0022	0.0006	0.0045	0.2111	0.4138	0.0021
	4553			nicotianamine	LC/MS pos early	43026	C05324		9882882		0.77	1.62	1.52	1.73	0.72	1.14	1.41	1.21	0.77	1.62	0.88	1.39									0.4122	0.2429	0.2213	0.4836	0.091	0.1643	0.0779	0.1172	0.2511	0.2361	0.5857	0.6214	0.1696	0.1819	0.2691	0.1991	0.533	0.5926	0.1574
	4629			stachydrine	LC/MS pos early	34384	C10172	HMDB04827	115244		0.94	1.1	1.22	1.35	0.92	1.12	1.19	1.38	1.13	1.31	1.27	1.53									0.6722	0.3299	0.3501	0.5922	0.1114	0.1785	0.0216	0.0482	0.4889	0.349	0.2718	0.4534	0.1821	0.1906	0.0145	0.0335	0.3884	0.5346	0.0315
	4636			syringic acid	LC/MS neg	37091	C10833	HMDB02085	10742		0.73	1.53	0.99	1.62	0.82	0.99	1.12	1.05	0.89	1.88	0.88	1.75									0.2351	0.1641	0.0496	0.2413	0.8726	0.5573	0.0312	0.0639	0.4717	0.3415	0.9572	0.7484	0.7509	0.4539	0.7916	0.3735	0.7031	0.6527	0.0073
	4653			ethyl alpha-glucopyranoside	LC/MS neg	63152			428040		0.72	0.91	6.84	1	0.22	1.35	2.13	1.5	1.2	1.5	1.62	1.06									0.0283	0.0327	0.5594	0.7125	5.6e-14	1.8095e-11	0.9168	0.5453	7.0984e-11	2.6882e-08	0.044	0.1572	6.3217e-06	7.6195e-05	0.0146	0.0335	0.1755	0.3799	0.0041
	4654			methyl glucopyranoside (alpha + beta)	LC/MS neg	46144					0.92	0.92	1.72	0.83	0.64	1.01	1.2	0.91	1.09	1.09	1.1	0.82									0.9451	0.4065	0.8524	0.7873	0.0541	0.1251	0.4271	0.3532	0.2621	0.24	0.8001	0.7156	0.3608	0.2929	0.7202	0.3539	0.5332	0.5926	0.6122
	4680			4-vinylguaiacol sulfate	LC/MS neg	48442					0.4	0.77	1.47	1.13	0.49	1.25	1.8	1.84	1.28	2.48	1.6	2.53									0.0113	0.0165	0.3231	0.5794	0.5856	0.4535	0.5307	0.3964	0.0358	0.0742	0.773	0.7045	0.303	0.265	0.0627	0.0821	0.3085	0.4897	0.0105
	4684			daidzein sulfate (2)	LC/MS neg	48728			12114465		0.41	1.35	0.48	1.15	1.44	0.84	1.69	0.72	0.8	2.66	0.67	1.12									0.0019	0.0046	0.5111	0.6854	0.0502	0.1204	0.6016	0.4262	0.5048	0.3522	0.6389	0.6431	0.0523	0.0781	0.5455	0.3051	0.4511	0.5601	0.0025
	4688			N-acetylpyrraline	LC/MS neg	48438					0.38	0.76	0.7	1.04	0.63	0.88	1.14	1.21	1.13	2.25	1	2.38									0.0336	0.0375	0.6794	0.7491	0.8055	0.5388	0.5664	0.4121	0.1274	0.1531	0.5332	0.6145	0.6867	0.4356	0.7164	0.3528	0.6748	0.6402	0.0331
	4689			daidzein sulfate (1)	LC/MS neg	48727			12114465		0.49	1.21	0.56	1.34	1.29	0.59	1.48	0.66	1.06	2.61	0.63	1.16									0.0102	0.0157	0.6372	0.7394	0.119	0.185	0.3621	0.3192	0.7689	0.4393	0.1688	0.3459	0.1637	0.1776	0.3446	0.2286	0.9924	0.727	0.003
	4720			furaneol sulfate	LC/MS neg	54795					0.75	1.05	1.09	1.32	0.83	1.21	1.2	1.51	1.77	2.47	2.14	3.09									0.2969	0.1949	0.78	0.7749	0.5177	0.4213	0.3269	0.3012	0.2607	0.2396	0.7139	0.6755	0.573	0.3923	0.2865	0.2078	0.1231	0.3294	0.0063
	4740			4-hydroxycinnamate	LC/MS neg	36770	C00811	HMDB02035	637542		0.78	0.73	0.73	1.05	1.18	0.87	1.1	1.24	1.3	1.23	1.13	1.39									0.3113	0.2014	0.2886	0.5596	0.2448	0.2779	0.935	0.5499	0.7099	0.4194	0.5659	0.6187	0.8278	0.4814	0.5652	0.3102	0.3168	0.4978	0.3409
	4760			caffeic acid sulfate	LC/MS polar	53254		HMDB41708			0.6	0.64	0.55	0.7	1.36	1.63	1.26	1.79	0.9	0.97	1.47	1.37									0.1018	0.0881	0.1959	0.4634	0.0561	0.1284	0.192	0.2203	0.362	0.2961	0.1008	0.2481	0.5347	0.3784	0.1031	0.1112	0.6736	0.6402	0.9515
	4763			tartronate (hydroxymalonate)	LC/MS neg	20693	C02287	HMDB35227	45		0.61	1.12	0.64	1.47	0.63	0.55	0.67	0.73	0.59	1.08	0.32	1.18									0.1393	0.1107	0.7504	0.7691	0.2243	0.2645	0.1361	0.1767	0.0611	0.101	0.0515	0.1723	0.1058	0.128	0.4212	0.2567	0.1509	0.3634	0.7173
	4770			3-indoleglyoxylic acid	LC/MS neg	63583			73863		0.56	0.79	0.55	0.97	0.93	0.74	0.93	0.91	0.96	1.37	0.71	1.34									0.0227	0.0275	0.4898	0.6829	0.1062	0.1752	0.9977	0.5649	0.3264	0.2796	0.2584	0.444	0.792	0.4688	0.6565	0.3358	0.7629	0.6782	0.1741
	4807		Bacterial/Fungal	triacetate lactone	LC/MS neg	48571	C02752				0.59	1.64	0.77	1.25	0.86	1.52	1.12	1.16	0.79	2.18	1.2	2.25									0.02	0.0253	0.0777	0.2925	0.2562	0.2872	0.4819	0.3787	0.4674	0.3415	0.083	0.2205	0.5817	0.3963	0.5025	0.2876	0.2982	0.4781	0.003
	5303		Drug - Topical Agents	salicylate	LC/MS neg	1515	C00805	HMDB01895	338		0.36	1.18	1.08	1	0.68	1.25	2.04	1.06	0.87	2.82	1.09	1.46									0.0009	0.0026	0.6067	0.7276	0.7778	0.5323	0.9586	0.5576	0.1409	0.1621	0.3728	0.5262	0.0212	0.0378	0.7424	0.36	0.7662	0.6784	0.0005
	5305			2,6-dihydroxybenzoic acid	LC/MS polar	63042		HMDB13676	9338		0.38	0.9	0.56	1.2	0.66	0.6	0.97	0.81	0.78	1.86	0.47	1.54									0.0002	0.0007	0.8235	0.7873	0.0481	0.1183	0.5541	0.4047	0.0378	0.0756	0.0699	0.1989	0.9992	0.5289	0.3006	0.214	0.2813	0.4718	0.0067
	5309			hydroquinone sulfate	LC/MS neg	35322	C00530	HMDB02434	161220		0.48	0.93	0.96	1.48	0.49	0.61	0.98	0.97	0.76	1.48	0.46	1.46									0.0928	0.0813	0.6809	0.7491	0.6959	0.4973	0.3254	0.3012	0.2021	0.2069	0.456	0.5792	0.9715	0.5248	0.8654	0.3919	0.5623	0.6053	0.1281
	5361		Chemical	diethanolamine	LC/MS pos early	20691	C06772	HMDB04437	8113		0.83	0.96	0.03	0.49	39.99	2.09	1.28	1.06	0.67	0.78	1.4	0.65									0.5849	0.3016	0.9813	0.81	0.1192	0.185	0.491	0.3823	0.0963	0.1326	0.4663	0.5854	0.5111	0.3663	0.9493	0.4113	0.5356	0.594	0.9225
	5383			sulfate*	LC/MS neg	46960	C00059	HMDB01448	1118		1.39	1	0.93	0.92	1.3	1.42	0.86	1.3	0.83	0.6	1.18	0.9									0.0086	0.0139	0.8169	0.7873	0.5659	0.4445	0.5233	0.3944	0.0349	0.0741	0.0041	0.0292	0.249	0.233	0.0338	0.0568	0.0975	0.2914	0.0002
	5386			O-sulfo-L-tyrosine	LC/MS neg	45413			514186		1.08	1.1	1.23	1.02	1.45	1.37	1.65	1.26	1.33	1.35	1.82	1.03									0.3904	0.2349	0.2703	0.5481	0.0206	0.0758	0.9849	0.5621	0.0001	0.0011	0.0008	0.0096	1.1222e-06	2.2318e-05	0.0151	0.0336	0.002	0.0278	0.001
	5405			2-aminophenol sulfate	LC/MS neg	43266		HMDB61116	181670		0.85	1.12	1.59	1.74	0.45	0.98	0.84	1.52	0.56	0.74	0.55	1.35									0.8718	0.3888	0.7817	0.7753	0.3883	0.3575	0.1684	0.2037	0.0822	0.1226	0.9029	0.7363	0.4547	0.3445	0.2194	0.1724	0.1922	0.395	0.38
	5435			S-(3-hydroxypropyl)mercapturic acid (HPMA)	LC/MS neg	44552			3371179		0.44	1.05	1.13	0.99	0.87	1.1	2.21	1.04	0.94	2.22	1.04	1.04									0.0004	0.0013	0.8837	0.7927	0.4571	0.3916	0.8831	0.5333	0.3696	0.3	0.6938	0.6665	0.0006	0.0022	0.9197	0.4028	0.7514	0.6747	0.0006
	5450			dimethyl sulfone	LC/MS pos early	43424	C11142	HMDB04983	6213		0.78	1.18	0.5	0.48	0.45	0.49	0.29	0.2	1.02	1.55	0.5	1.07									0.8229	0.3764	0.9645	0.8079	0.0268	0.0879	0.0428	0.0825	0.1178	0.1463	0.0887	0.2251	0.0008	0.003	0.0005	0.0037	0.8115	0.6837	0.6128
	5452			ectoine	LC/MS pos early	35651	C06231		126041		0.61	0.96	1.05	1.65	1.12	0.78	1.92	1.34	1.15	1.8	0.89	1.26									0.023	0.0276	0.954	0.804	0.5444	0.434	0.0969	0.1384	0.9538	0.4914	0.374	0.5262	0.006	0.0143	0.3924	0.2429	0.6808	0.643	0.0098
	5494			triethanolamine	LC/MS pos early	22202	C06771	HMDB32538	7618		0.75	0.97	0.01	0.51	241.99	1.72	2.55	0.89	0.57	0.74	0.98	0.26									0.9186	0.4008	0.941	0.8033	0.2706	0.2925	0.647	0.4479	0.0544	0.095	0.8171	0.7165	0.3352	0.2813	0.8782	0.3932	0.6533	0.639	0.6736
	5499			4-methylbenzenesulfonate	LC/MS neg	43592	C06677		6101		0.19	1.06	0.04	0.97	5.88	1.27	1.2	1.17	0.21	1.21	0.27	1.17									3.9309e-06	4.6156e-05	0.8844	0.7927	1.4134e-11	2.0908e-09	0.9068	0.5423	1.2533e-05	0.0002	0.4582	0.5795	0.6059	0.4023	0.63	0.328	1.2762e-05	0.0016	0.5855
	5505			1,2,3-benzenetriol sulfate (2)	LC/MS neg	48762					0.52	2.01	0.36	1.44	8.26	2.11	5.71	1.5	1.36	5.24	2.85	1.38									0.3573	0.2204	0.622	0.7306	0.2562	0.2872	0.8037	0.5139	0.1551	0.1722	0.5227	0.6121	0.2261	0.2199	0.9192	0.4028	0.7952	0.6834	0.1001
	5508			3-hydroxypyridine sulfate	LC/MS neg	48448					0.36	0.71	0.65	1.36	0.79	0.99	1.42	1.89	1.22	2.42	1.21	3.22									0.0312	0.0353	0.5092	0.6854	0.296	0.3105	0.4497	0.3641	0.3905	0.3114	0.8845	0.7335	0.7504	0.4539	0.2075	0.1666	0.4389	0.5541	0.024
	5510			1,2,3-benzenetriol sulfate (1)	LC/MS neg	48761					0.61	2.95	0.84	1.43	4.97	2.47	6.82	1.2	0.83	4.02	2.06	0.71									0.5058	0.2737	0.1914	0.4622	0.5256	0.4242	0.9344	0.5499	0.1078	0.1393	0.3235	0.4932	0.1016	0.1247	0.805	0.3775	0.7877	0.6805	0.0922
	5523			thioproline	LC/MS pos early	53231			93176		0.84	0.74	0.96	1.12	1.02	1.02	1.16	1.52	1.33	1.18	1.36	1.55									0.1463	0.1148	0.3117	0.5762	0.8388	0.5442	0.5948	0.4256	0.918	0.4822	0.5825	0.6208	0.1749	0.1845	0.0418	0.0654	0.3351	0.5028	0.1597
	5537			3-hydroxy-2-methylpyridine sulfate	LC/MS neg	63227					0.38	0.77	0.56	1.44	0.9	0.89	1.33	1.67	1.05	2.12	0.93	2.65									0.1417	0.1121	0.643	0.7397	0.1689	0.2235	0.3873	0.3305	0.9301	0.4834	0.6799	0.6595	0.9918	0.5289	0.3604	0.234	0.4898	0.5713	0.092
	5543			3,5-dichloro-2,6-dihydroxybenzoic acid	LC/MS polar	63589					0.34	0.67	0.62	0.54	0.79	0.96	1.44	0.78	0.62	1.21	0.59	0.66									1.3254e-06	2.2116e-05	0.0393	0.2152	0.0117	0.0537	0.0024	0.0109	0.3286	0.2805	0.7599	0.697	0.0304	0.0503	0.1552	0.1407	0.0261	0.1322	0.1572
	5548			4-chlorobenzoic acid	LC/MS neg	63988					1.06	0.9	1.17	1.11	0.81	0.93	0.9	1.14	0.96	0.82	0.89	1.03									0.5413	0.2889	0.2064	0.4697	0.0598	0.1314	0.2417	0.2503	0.0144	0.0428	0.3556	0.5173	0.2191	0.2151	0.1321	0.1289	0.6147	0.6225	0.0216
	5638	Partially Characterized Molecules	Partially Characterized Molecules	pentose acid*	LC/MS polar	63264					0.37	0.81	0.65	0.97	1.18	1.13	2.06	1.34	1.08	2.35	1.21	1.53									2.8668e-07	6.9914e-06	0.1611	0.4269	0.017	0.0685	0.7561	0.4953	0.456	0.3366	0.429	0.5634	4.7685e-05	0.0003	0.0635	0.0821	0.605	0.6225	4.0102e-06
	5648			branched-chain, straight-chain, or cyclopropyl 12:1 fatty acid*	LC/MS neg	63683					1.18	1.63	2.19	0.32	0.6	1.63	1.11	0.33	0.91	1.25	1.49	0.37									0.8633	0.3868	0.5522	0.7083	0.029	0.0912	0.0663	0.1052	0.0377	0.0756	0.4922	0.5938	0.9563	0.5218	0.0802	0.0952	0.9621	0.7207	0.7069
[truncated: 41 more columns]
